# Supplementary material for: The enantioselective construction of tetracyclic diterpene skeletons with Friedel–Crafts alkylation and palladium-catalyzed cycloalkenylation reactions
Source: Royal Society of Chemistry journal article supplement (doi:10.1039/c4ob02489c), 2015-01-01

## Supporting Information

### The Enantioselective Construction of Complex Tetracyclic Natural Product Skeletons with Friedel-Crafts Alkylation and Palladium-Catalyzed Cycloalkenylation Reactions

Sarah J. Burke, William P. Malachowski\*, Sharan K. Mehta and Roselyn Appenteng

Department of Chemistry, Bryn Mawr College, Bryn Mawr, Pennsylvania 19010-2899 USA.

| Page Number | Item                                                                                 |
|-------------|--------------------------------------------------------------------------------------|
| S3-S5       | <sup>1</sup> H NMR, <sup>13</sup> C NMR and GC/MS for <b>2a</b>                      |
| S6-S9       | <sup>1</sup> H NMR, <sup>13</sup> C NMR and GC/MS for <b>2b</b>                      |
| S10-S13     | <sup>1</sup> H NMR, <sup>13</sup> C NMR and GC/MS for <b>2c</b>                      |
| S14-S17     | <sup>1</sup> H NMR, <sup>13</sup> C NMR and GC/MS for <b>2d</b>                      |
| S18-S20     | <sup>1</sup> H NMR, <sup>13</sup> C NMR and GC/MS for <b>2e</b>                      |
| S21-S24     | <sup>1</sup> H NMR, <sup>13</sup> C NMR and GC/MS for <b>3a</b>                      |
| S25-S29     | <sup>1</sup> H NMR, <sup>13</sup> C NMR and GC/MS for <b>3b</b>                      |
| S30-S34     | <sup>1</sup> H NMR, <sup>13</sup> C NMR and GC/MS for <b>3c</b>                      |
| S35-S37     | <sup>1</sup> H NMR, <sup>13</sup> C NMR and GC/MS for <b>3d</b>                      |
| S38-S42     | <sup>1</sup> H NMR, <sup>13</sup> C NMR and GC/MS for <b>3e</b>                      |
| S43-S46     | <sup>1</sup> H NMR, <sup>13</sup> C NMR and GC/MS for <b>4a</b>                      |
| S47-S51     | <sup>1</sup> H NMR, <sup>13</sup> C NMR and GC/MS for <b>4b</b>                      |
| S52-S55     | <sup>1</sup> H NMR, <sup>13</sup> C NMR and GC/MS for <b>4c</b>                      |
| S56-S58     | <sup>1</sup> H NMR, <sup>13</sup> C NMR and GC/MS for <b>4d</b>                      |
| S59-S63     | <sup>1</sup> H NMR, <sup>13</sup> C NMR and GC/MS for <b>4e</b>                      |
| S64         | <sup>1</sup> H NMR and <sup>13</sup> C NMR for <b>5a</b>                             |
| S65         | <sup>1</sup> H NMR and <sup>13</sup> C NMR for <b>5b</b>                             |
| S66         | <sup>1</sup> H NMR and <sup>13</sup> C NMR for <b>5c</b>                             |
| S67         | <sup>1</sup> H NMR and <sup>13</sup> C NMR for <b>5d</b>                             |
| S68         | <sup>1</sup> H NMR and <sup>13</sup> C NMR for <b>5e</b>                             |
| S69         | <sup>1</sup> H NMR and <sup>13</sup> C NMR for <b>6a</b>                             |
| S70         | <sup>1</sup> H NMR and <sup>13</sup> C NMR for <b>6b</b>                             |
| S71         | <sup>1</sup> H NMR and <sup>13</sup> C NMR for <b>6c</b>                             |
| S72-S75     | <sup>1</sup> H NMR, <sup>13</sup> C NMR and LC Enantioselectivity data for <b>6d</b> |
| S76         | <sup>1</sup> H NMR and <sup>13</sup> C NMR for <b>6e</b>                             |
| S77         | <sup>1</sup> H NMR and <sup>13</sup> C NMR for <b>7a</b>                             |
| S78         | <sup>1</sup> H NMR and <sup>13</sup> C NMR for <b>7b</b>                             |
| S79         | <sup>1</sup> H NMR and <sup>13</sup> C NMR for <b>7c</b>                             |
| S80         | <sup>1</sup> H NMR and <sup>13</sup> C NMR for <b>7d</b>                             |
| S81         | <sup>1</sup> H NMR and <sup>13</sup> C NMR for <b>7e</b>                             |
| S82         | <sup>1</sup> H NMR and <sup>13</sup> C NMR for <b>8a</b>                             |
| S83         | <sup>1</sup> H NMR and <sup>13</sup> C NMR for <b>8b</b>                             |
| S84         | <sup>1</sup> H NMR and <sup>13</sup> C NMR for <b>8c</b>                             |
| S85         | <sup>1</sup> H NMR and <sup>13</sup> C NMR for <b>8d</b>                             |
| S86         | <sup>1</sup> H NMR and <sup>13</sup> C NMR for <b>8e</b>                             |
| S87-S89     | <sup>1</sup> H NMR, <sup>13</sup> C NMR and GC/MS for <b>9a</b>                      |
| S90-S92     | <sup>1</sup> H NMR, <sup>13</sup> C NMR and GC/MS for <b>9b</b>                      |

|           |                                                                                     |
|-----------|-------------------------------------------------------------------------------------|
| S93-S96   | <sup>1</sup> H NMR, <sup>13</sup> C NMR and GC/MS for <b>9c</b>                     |
| S97-S99   | <sup>1</sup> H NMR, <sup>13</sup> C NMR and GC/MS for <b>9d</b>                     |
| S100-S102 | <sup>1</sup> H NMR, <sup>13</sup> C NMR and GC/MS for <b>9e</b>                     |
| S103-S106 | <sup>1</sup> H NMR, <sup>13</sup> C NMR and GC/MS for <b>10a</b>                    |
| S107-S111 | <sup>1</sup> H NMR, <sup>13</sup> C NMR and GC/MS for <b>10b</b>                    |
| S112-S115 | <sup>1</sup> H NMR, <sup>13</sup> C NMR and GC/MS for <b>10c</b>                    |
| S116-S119 | <sup>1</sup> H NMR, <sup>13</sup> C NMR and GC/MS for <b>10d</b>                    |
| S120-S123 | <sup>1</sup> H NMR, <sup>13</sup> C NMR and GC/MS for <b>10e</b>                    |
| S124      | <sup>1</sup> H NMR and <sup>13</sup> C NMR for <b>11b</b>                           |
| S125-S126 | <sup>1</sup> H NMR and <sup>13</sup> C NMR for <b>11d</b>                           |
| S127      | <sup>1</sup> H NMR and <sup>13</sup> C NMR for <b>11e</b>                           |
| S128      | <sup>1</sup> H NMR and <sup>13</sup> C NMR for <b>12a</b>                           |
| S129-S130 | <sup>1</sup> H NMR and <sup>13</sup> C NMR for <b>12b</b>                           |
| S131-S132 | <sup>1</sup> H NMR and <sup>13</sup> C NMR for <b>12d</b>                           |
| S133-S134 | <sup>1</sup> H NMR and <sup>13</sup> C NMR for <b>12e</b>                           |
| S135-S17  | <sup>1</sup> H NMR, <sup>13</sup> C NMR and GC/MS for <b>13b</b>                    |
| S138-S140 | <sup>1</sup> H NMR, <sup>13</sup> C NMR and GC/MS for <b>13d</b>                    |
| S141-S143 | <sup>1</sup> H NMR, <sup>13</sup> C NMR and GC/MS for <b>13e</b>                    |
| S144-S146 | <sup>1</sup> H NMR, <sup>13</sup> C NMR and GC/MS for <b>14b</b>                    |
| S147-S149 | <sup>1</sup> H NMR, <sup>13</sup> C NMR and GC/MS for <b>14d</b>                    |
| S150-S152 | <sup>13</sup> C NMR and GC/MS for <b>14e</b>                                        |
| S153-S156 | <sup>1</sup> H NMR, <sup>13</sup> C NMR, GC/MS, COSY and NOESY for <b>15b</b>       |
| S157-S160 | <sup>1</sup> H NMR, <sup>13</sup> C NMR, GC/MS, COSY and NOESY for <b>15d</b>       |
| S161-S163 | <sup>1</sup> H NMR, <sup>13</sup> C NMR and GC/MS for <b>15e</b>                    |
| S164-S167 | <sup>1</sup> H NMR, <sup>13</sup> C NMR, GC/MS, COSY and NOESY for <b>16b</b>       |
| S168-S172 | <sup>1</sup> H NMR, <sup>13</sup> C NMR, GC/MS, COSY, NOESY and HSQC for <b>16d</b> |
| S173-S175 | <sup>1</sup> H NMR, <sup>13</sup> C NMR and GC/MS for <b>16e</b>                    |
| S176-S181 | <sup>1</sup> H NMR, COSY and GC/MS for <b>17</b> and <b>18</b>                      |
| S182-S187 | <sup>1</sup> H NMR, COSY and GC/MS for <b>19</b> and <b>20</b>                      |
| S188-S193 | <sup>1</sup> H NMR, <sup>13</sup> C NMR and GC/MS for <b>21</b>                     |
| S194-S198 | <sup>1</sup> H NMR and GC/MS for <b>25-28</b>                                       |
| S199-S202 | <sup>1</sup> H NMR, <sup>13</sup> C NMR, GC/MS, COSY, HSQC and NOESY for <b>26</b>  |

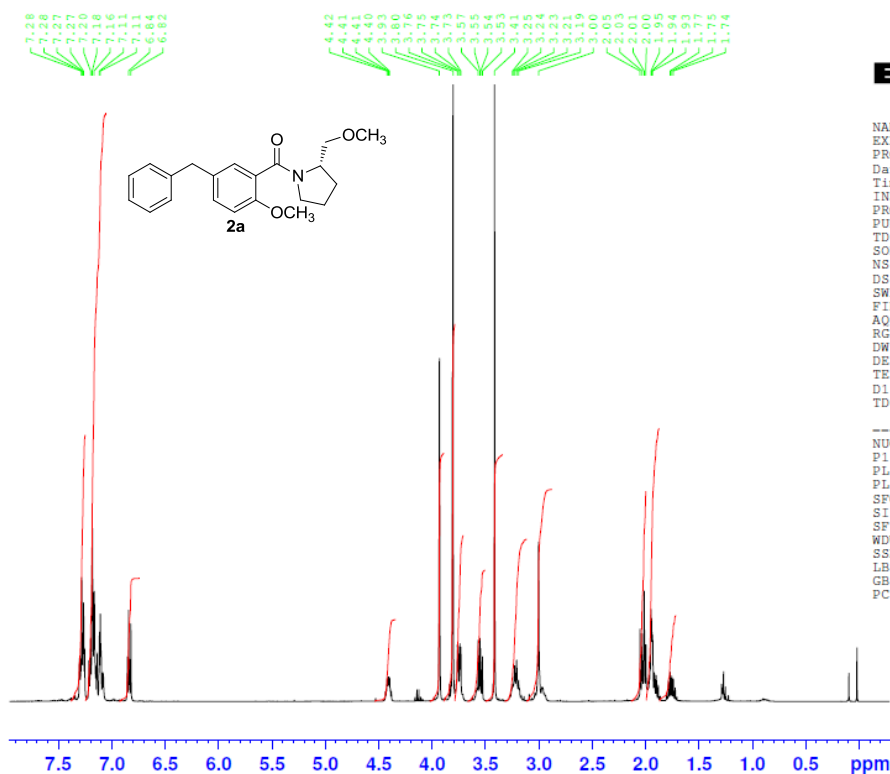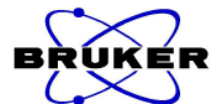

NAME sjb\_77\_106fp4  
EXPNO 1  
PROCNO 1  
Date\_ 20130617  
Time 7.50  
INSTRUM spect  
PROBHD 5 mm PABBO BB-  
PULPROG zg30  
TD 65536  
SOLVENT CDCl3  
NS 16  
DS 2  
SWH 8223.685 Hz  
FIDRES 0.125483 Hz  
AQ 3.9846387 sec  
RG 45.2  
DW 60.800 usec  
DE 6.50 usec  
TE 301.2 K  
D1 1.00000000 sec  
TDO 1

----- CHANNEL f1 -----  
NUC1 1H  
P1 12.50 usec  
PL1 -2.00 dB  
PL1W 12.14226913 W  
SFO1 400.1524711 MHz  
SI 32768  
SF 400.1500000 MHz  
WDW EM  
SSB 0  
LB 0.30 Hz  
GB 0  
PC 1.00

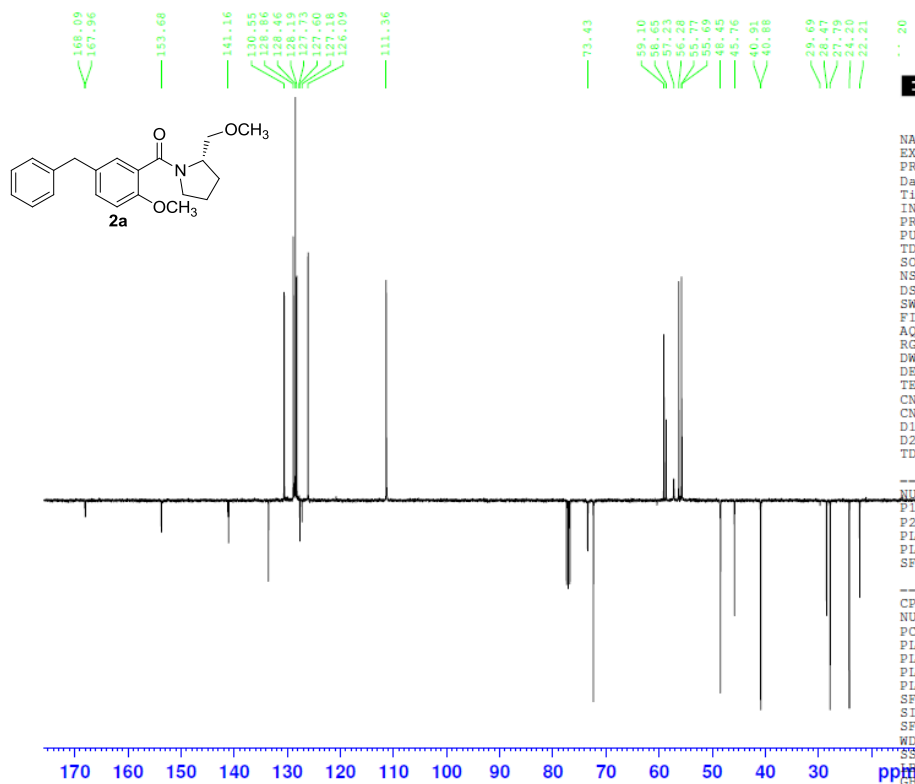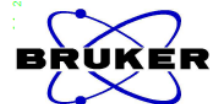

NAME sjb\_77\_106fp APT2  
EXPNO 1  
PROCNO 1  
Date\_ 20130617  
Time 9.07  
INSTRUM spect  
PROBHD 5 mm PABBO BB-  
PULPROG jmod  
TD 65536  
SOLVENT CDCl3  
NS 1024  
DS 4  
SWH 24038.461 Hz  
FIDRES 0.366798 Hz  
AQ 1.3631988 sec  
RG 203  
DW 20.800 usec  
DE 6.50 usec  
TE 301.2 K  
CNST2 145.0000000  
CNST11 1.0000000  
D1 2.00000000 sec  
D20 0.00689655 sec  
TDO 1

----- CHANNEL f1 -----  
NUC1 13C  
P1 8.00 usec  
P2 16.00 usec  
PL1 -2.00 dB  
PL1W 56.13311005 W  
SFO1 100.6278593 MHz  
----- CHANNEL f2 -----  
CPDPRG2 waltz16  
NUC2 1H  
PCPD2 80.00 usec  
PL2 -2.00 dB  
PL12 14.00 dB  
PL2W 12.14226913 W  
PL12W 0.30500001 W  
SFO2 400.1515629 MHz  
SI 32768  
SF 100.6177980 MHz  
WDW EM  
SSB 0  
LB 1.00 Hz  
GB 0  
PC 1.40

# Area Percent Report

Data Path : C:\msdchem\1\DATA\  
 Data File : sjb\_77\_106 fr6-10.D  
 Acq On : 11 Jun 2013 19:45  
 Operator : sjb  
 Sample : sjb\_77\_106 fr6-10  
 Misc :  
 ALS Vial : 95 Sample Multiplier: 1

Integration Parameters: autoint1.e  
 Integrator: ChemStation

Method : C:\msdchem\1\5973N\PRECISION.M  
 Title :

Signal : TIC: sjb\_77\_106 fr6-10.D\data.ms

| peak<br># | R.T.<br>min | first<br>scan | max<br>scan | last<br>scan | PK<br>TY | peak<br>height | corr.<br>area | corr.<br>% max. | % of<br>total |
|-----------|-------------|---------------|-------------|--------------|----------|----------------|---------------|-----------------|---------------|
| 1         | 7.462       | 495           | 503         | 539          | BV 3     | 88847          | 5339264       | 0.53%           | 0.524%        |
| 2         | 8.516       | 679           | 688         | 720          | BV 3     | 78689          | 3977198       | 0.40%           | 0.390%        |
| 3         | 11.592      | 1205          | 1225        | 1232         | PV 7     | 20748          | 714829        | 0.07%           | 0.070%        |
| 4         | 11.765      | 1241          | 1255        | 1306         | PV 2     | 38376200       | 1003659892    | 100.00%         | 98.448%       |
| 5         | 12.060      | 1306          | 1307        | 1314         | VV 4     | 119329         | 2690695       | 0.27%           | 0.264%        |
| 6         | 12.107      | 1314          | 1315        | 1321         | VV 6     | 81401          | 1599566       | 0.16%           | 0.157%        |
| 7         | 12.145      | 1321          | 1322        | 1337         | VV 9     | 51004          | 1503320       | 0.15%           | 0.147%        |

Sum of corrected areas: 1019484764

Abundance

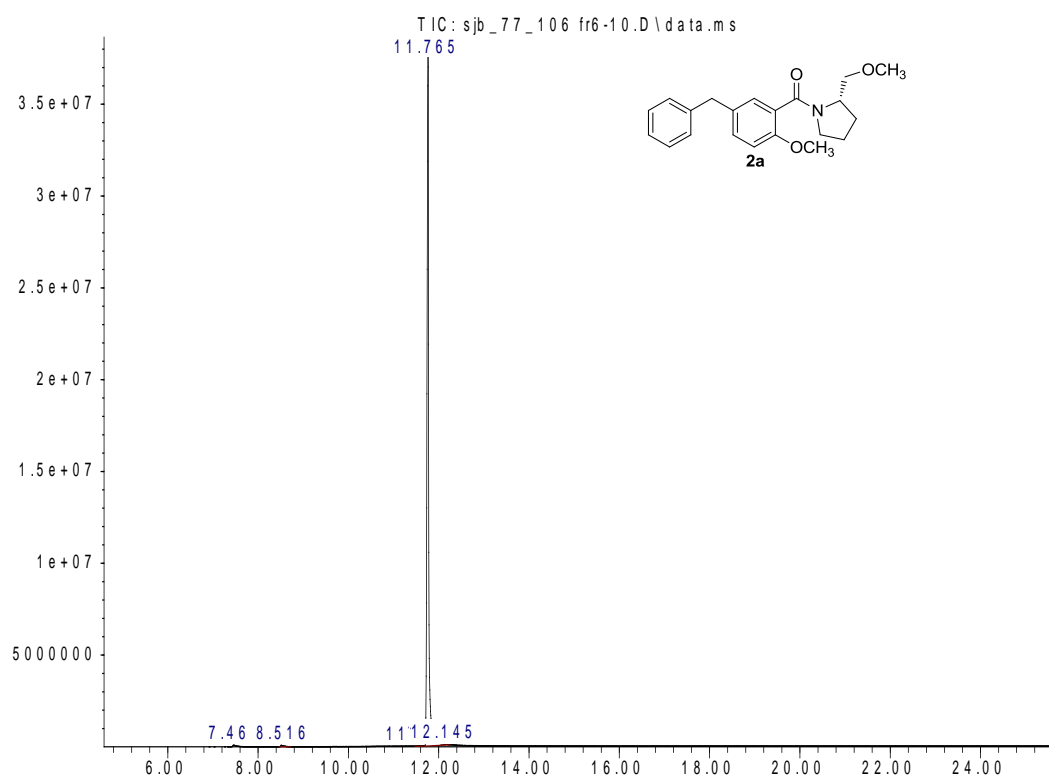

Time-->

Abundance

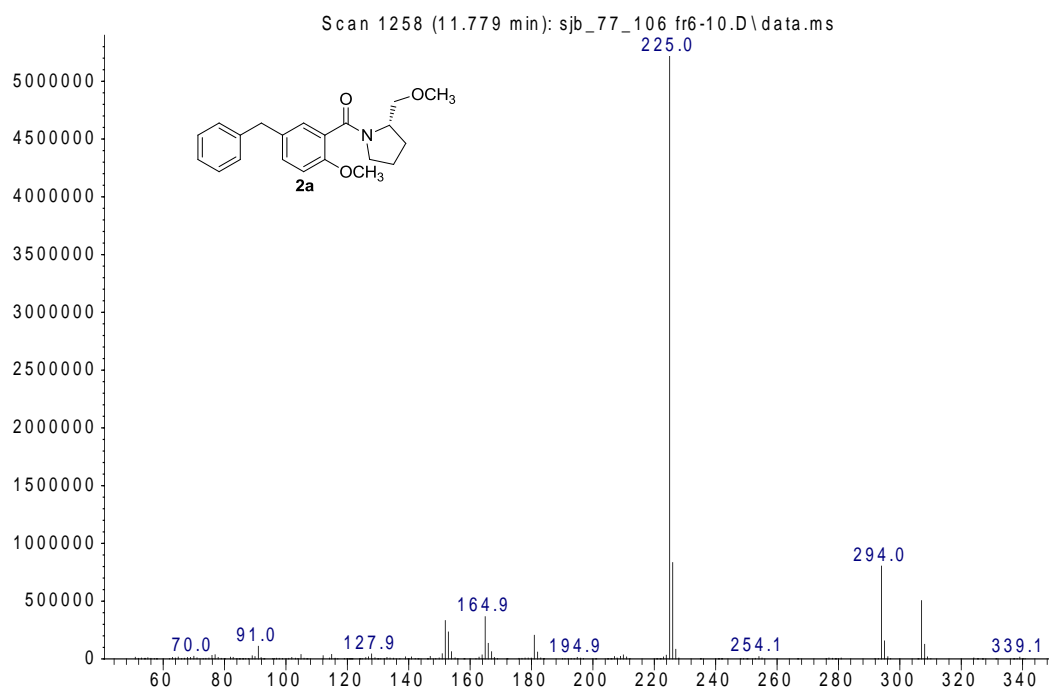

m/z-->

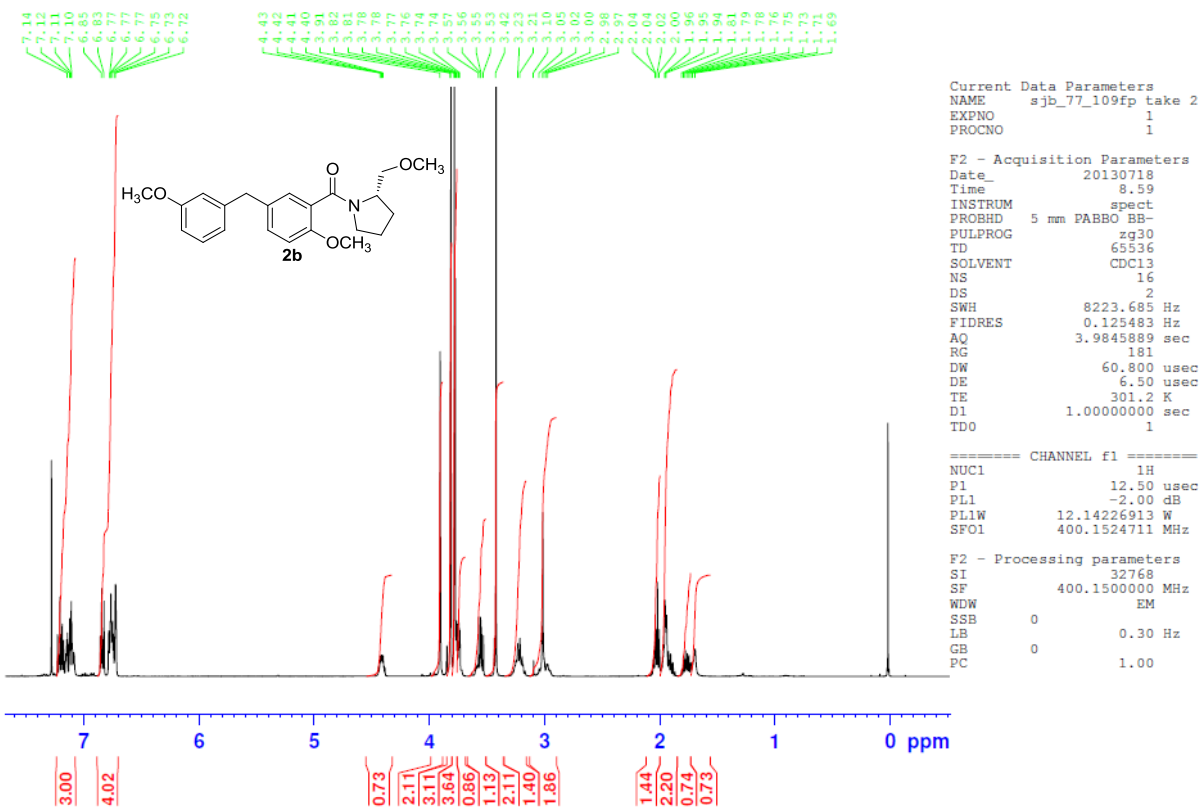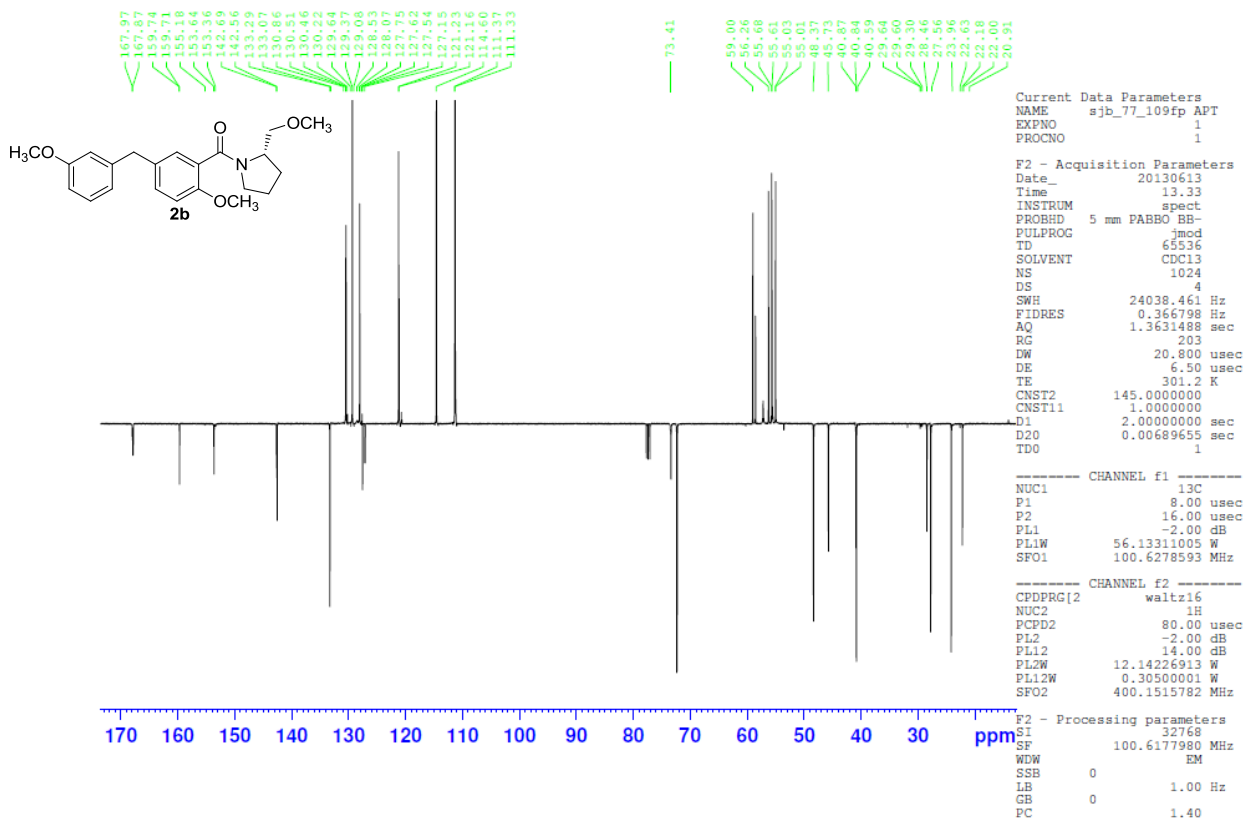

# Area Percent Report

Data Path : C:\msdchem\1\DATA\  
 Data File : sjb\_77\_140fp.D  
 Acq On : 9 Jul 2013 13:36  
 Operator : AK  
 Sample : sjb\_77\_140fp  
 Misc :  
 ALS Vial : 80 Sample Multiplier: 1

Integration Parameters: autoint1.e  
 Integrator: ChemStation

Method : C:\msdchem\1\5973N\PRECISION.M  
 Title :

Signal : TIC: sjb\_77\_140fp.D\data.ms

| peak<br># | R.T.<br>min | first<br>scan | max<br>scan | last<br>scan | PK<br>TY | peak<br>height | corr.<br>area | corr.<br>% max. | % of<br>total |
|-----------|-------------|---------------|-------------|--------------|----------|----------------|---------------|-----------------|---------------|
| 1         | 7.369       | 479           | 487         | 520          | BV       | 1310017        | 25296056      | 4.59%           | 4.282%        |
| 2         | 7.889       | 572           | 578         | 614          | PV       | 448612         | 11314701      | 2.05%           | 1.916%        |
| 3         | 13.511      | 1536          | 1561        | 1634         | PV       | 14301284       | 551191459     | 100.00%         | 93.314%       |
| 4         | 13.937      | 1634          | 1635        | 1642         | VV 6     | 65507          | 1414234       | 0.26%           | 0.239%        |
| 5         | 13.986      | 1642          | 1644        | 1649         | VV 6     | 40178          | 838374        | 0.15%           | 0.142%        |
| 6         | 14.025      | 1649          | 1650        | 1656         | VV 6     | 31550          | 525723        | 0.10%           | 0.089%        |
| 7         | 14.066      | 1656          | 1658        | 1660         | VV 3     | 14484          | 107248        | 0.02%           | 0.018%        |

Sum of corrected areas: 590687795

Abundance

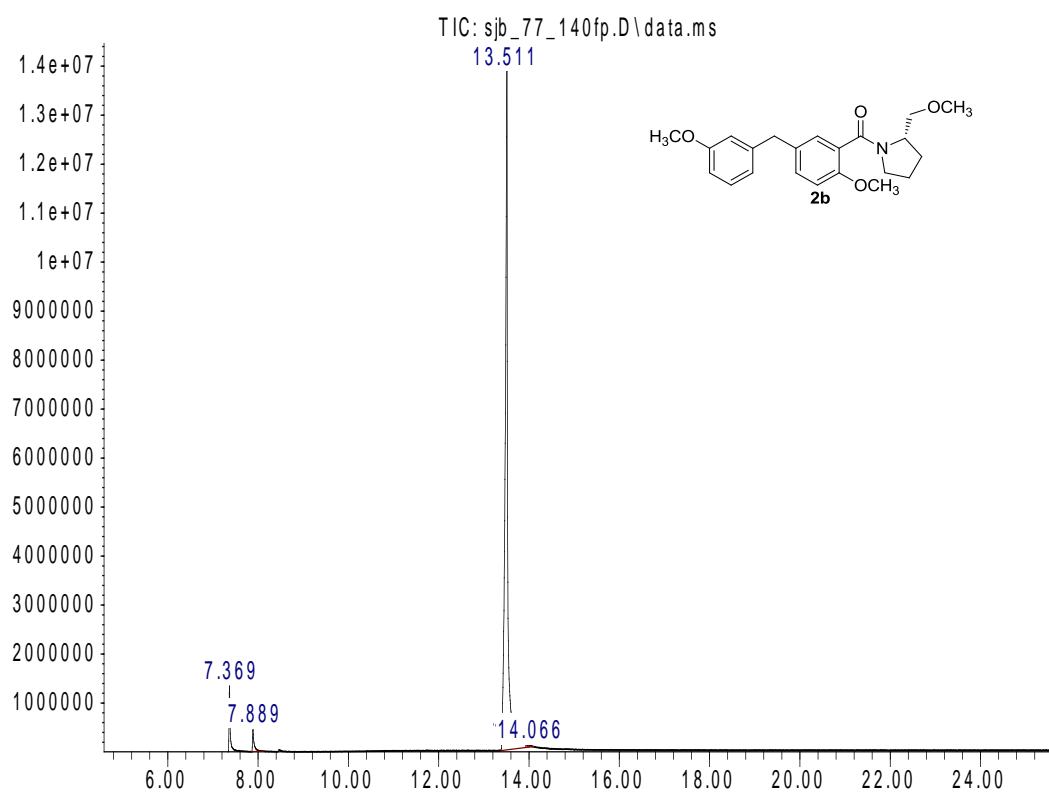

Time-->

Abundance

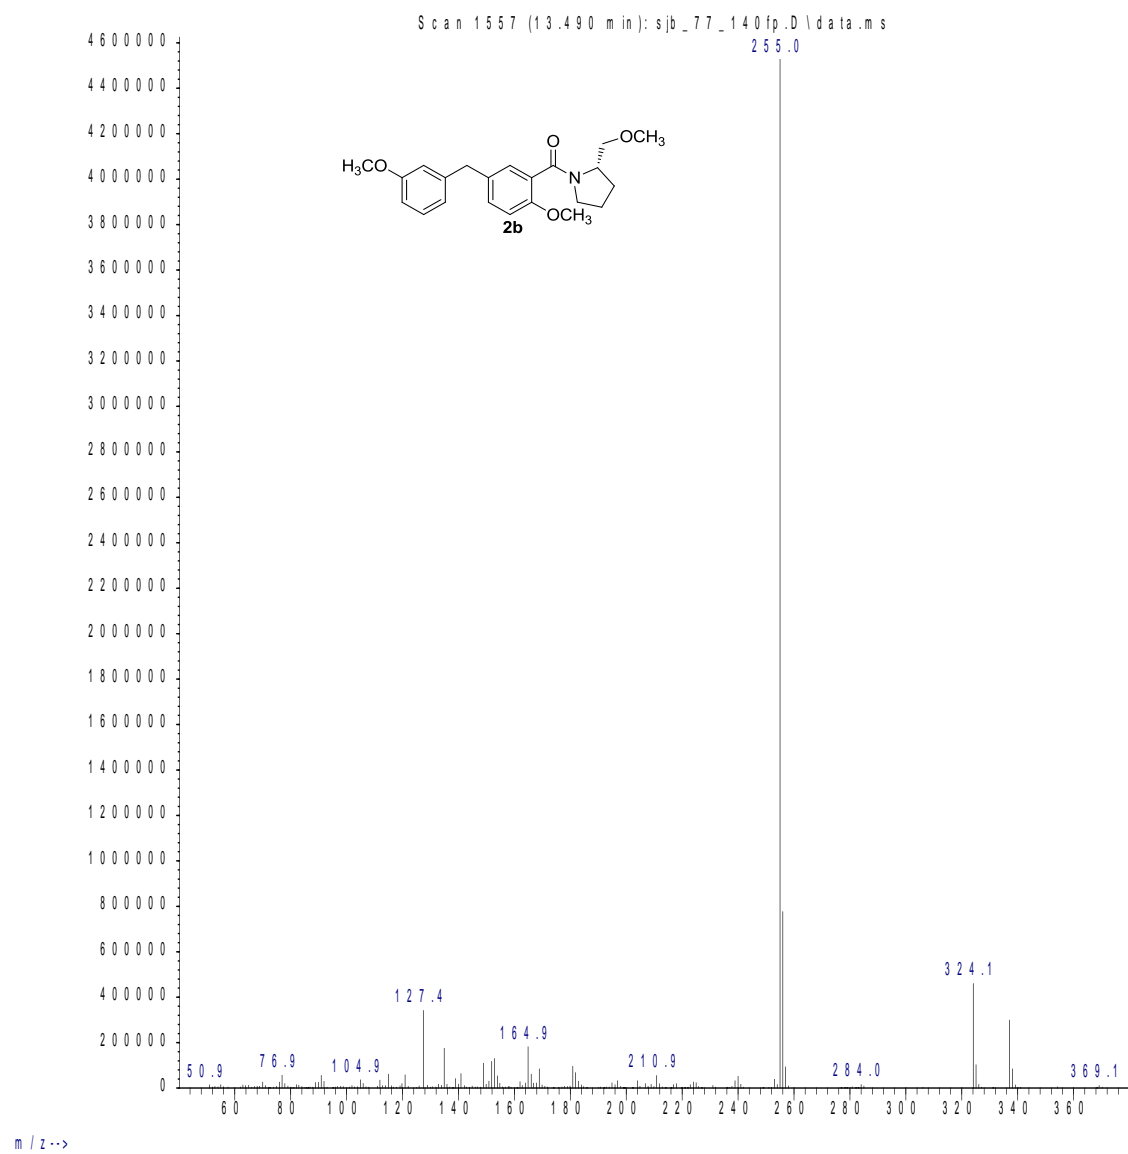

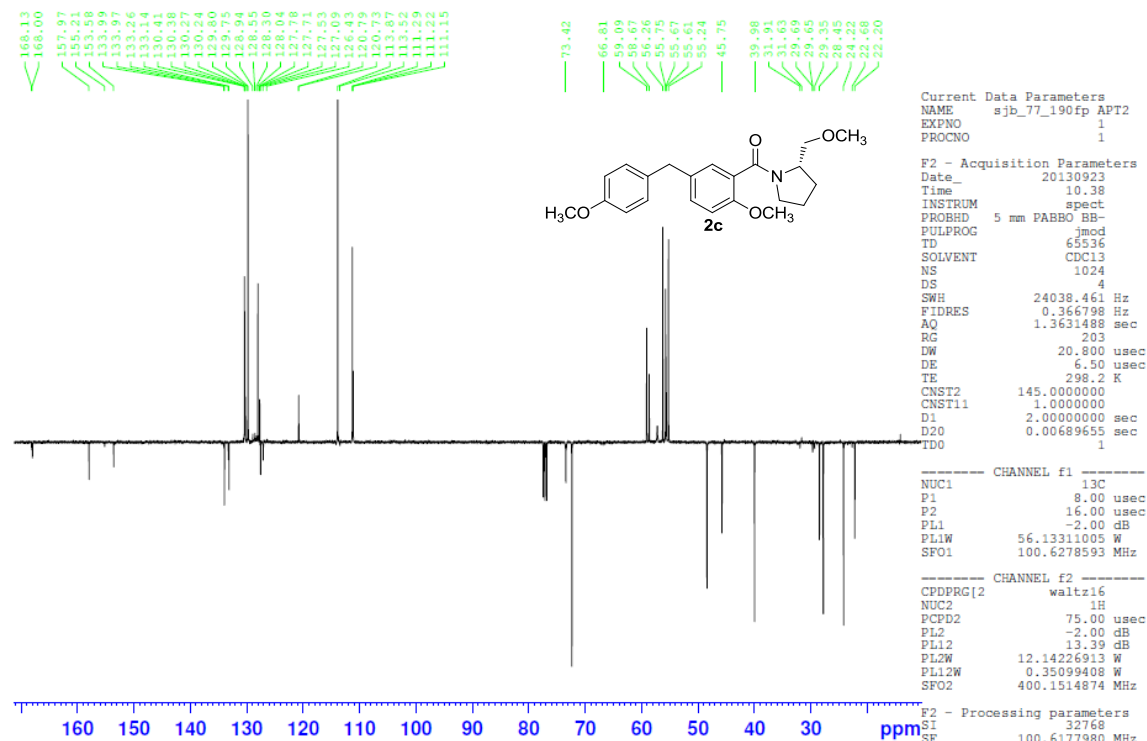

# Area Percent Report

Data Path : C:\msdchem\1\DATA\  
Data File : sjb\_77\_190fp.D  
Acq On : 10 Sep 2013 9:25  
Operator : sjb  
Sample : sjb\_77\_190fp  
Misc :  
ALS Vial : 85 Sample Multiplier: 1

Integration Parameters: autoint1.e  
Integrator: ChemStation

Method : C:\msdchem\1\5973N\PRECISION.M  
Title :

Signal : TIC: sjb\_77\_190fp.D\data.ms

| peak<br># | R.T.<br>min | first<br>scan | max<br>scan | last<br>scan | PK<br>TY | peak<br>height | corr.<br>area | corr.<br>% max. | % of<br>total |
|-----------|-------------|---------------|-------------|--------------|----------|----------------|---------------|-----------------|---------------|
| 1         | 7.370       | 481           | 487         | 517          | BV       | 1069928        | 19231620      | 7.04%           | 6.523%        |
| 2         | 13.905      | 1598          | 1629        | 1660         | BV       | 6770640        | 273181350     | 100.00%         | 92.651%       |
| 3         | 14.085      | 1660          | 1661        | 1687         | VV 6     | 69181          | 2435562       | 0.89%           | 0.826%        |

Sum of corrected areas: 29484853

Abundance

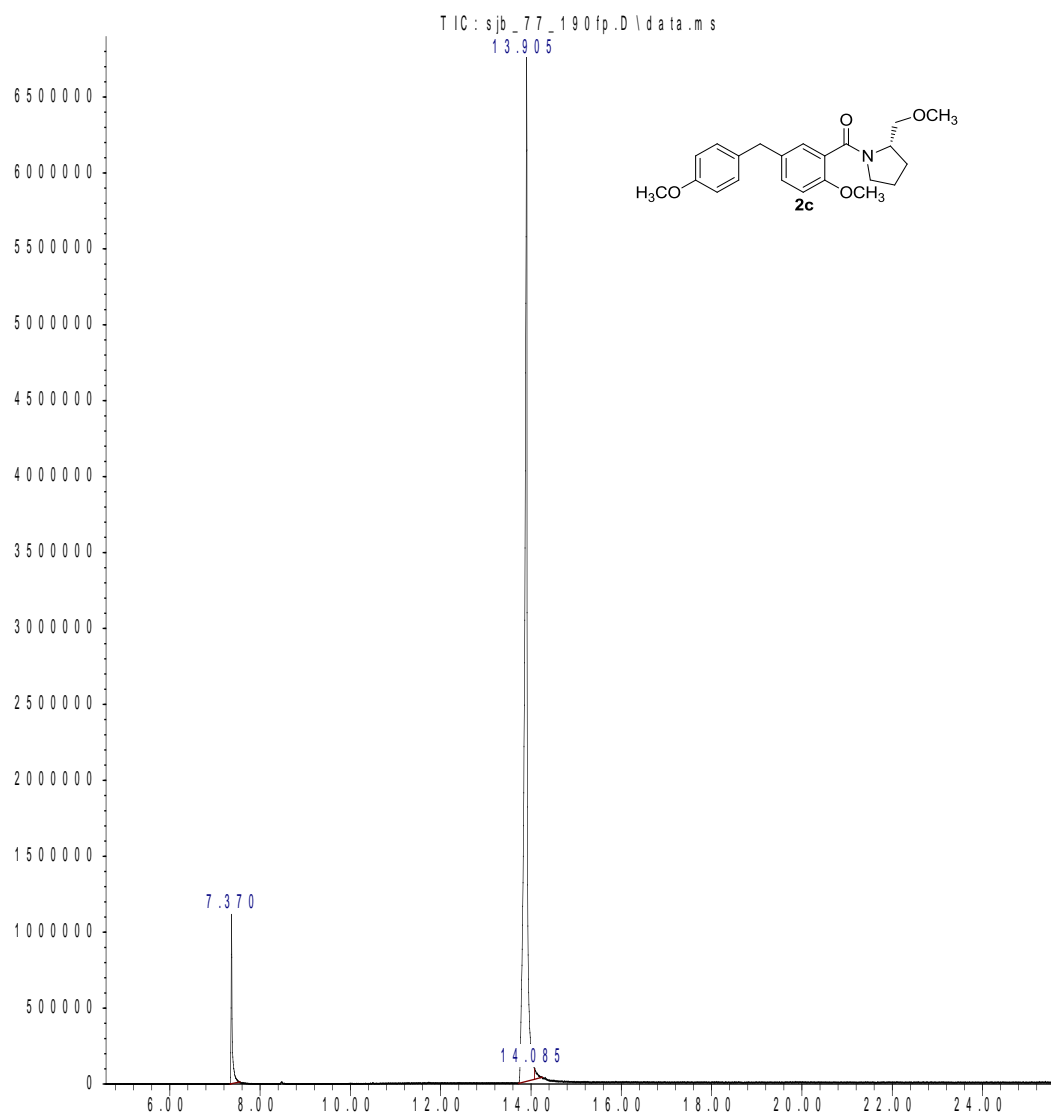

Abundance

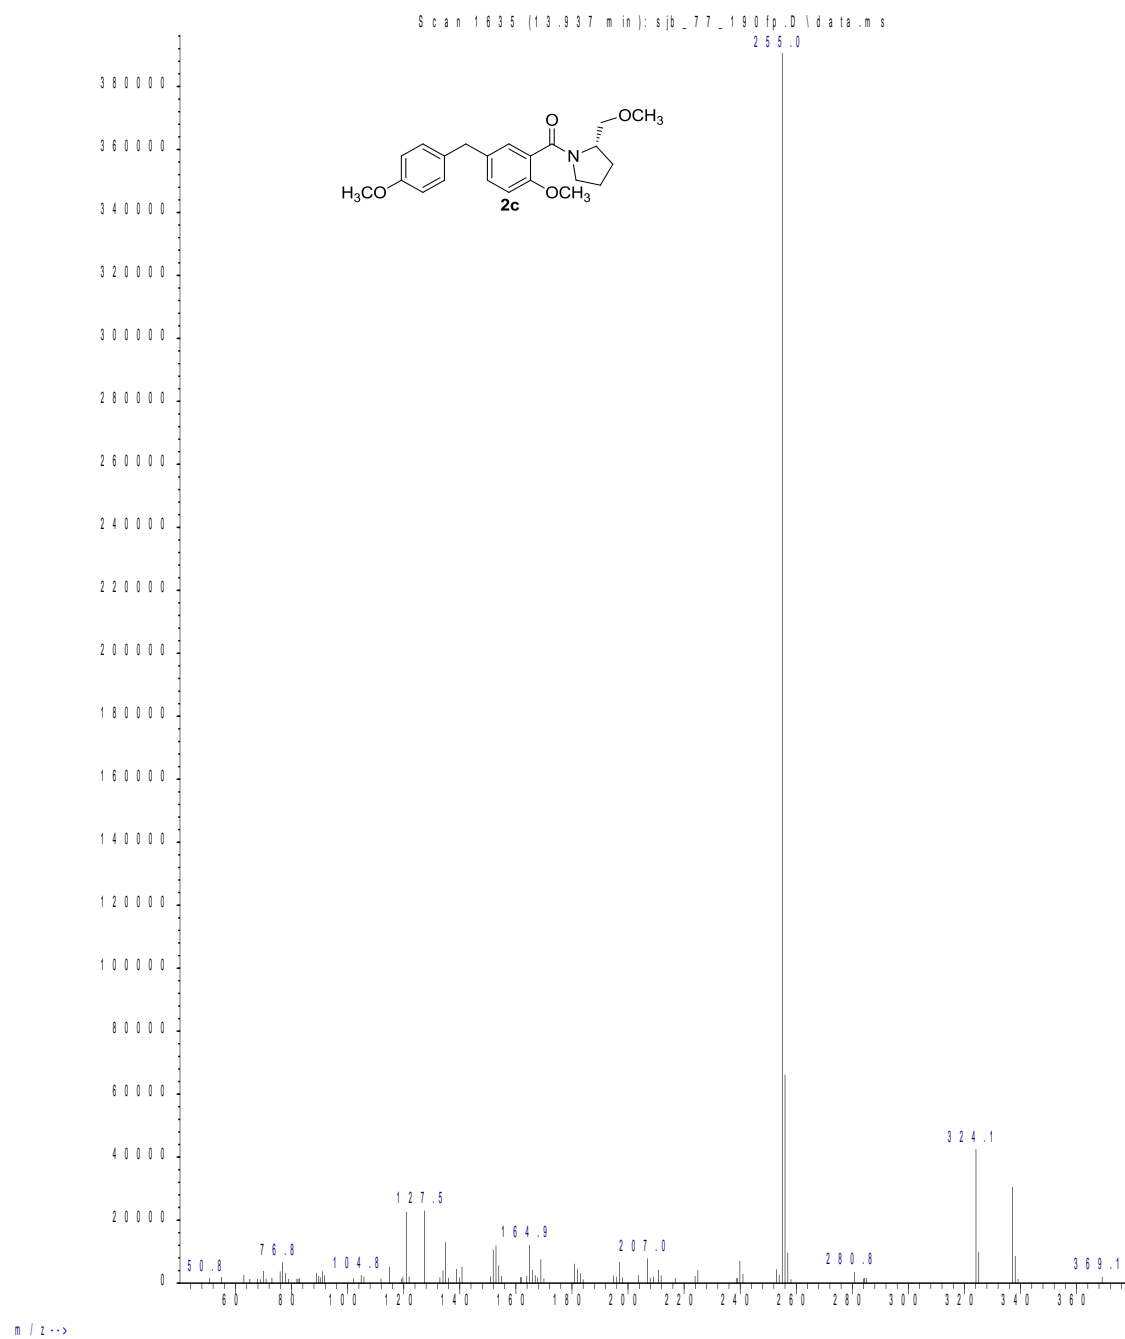

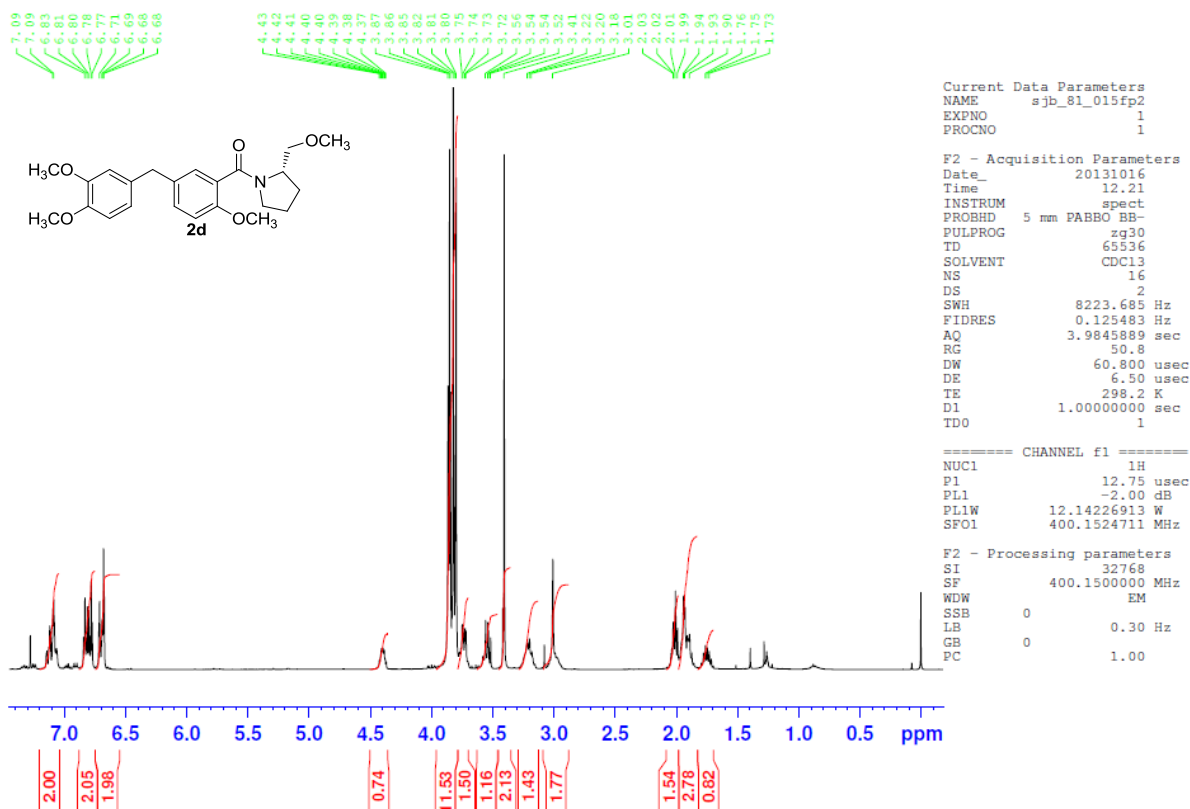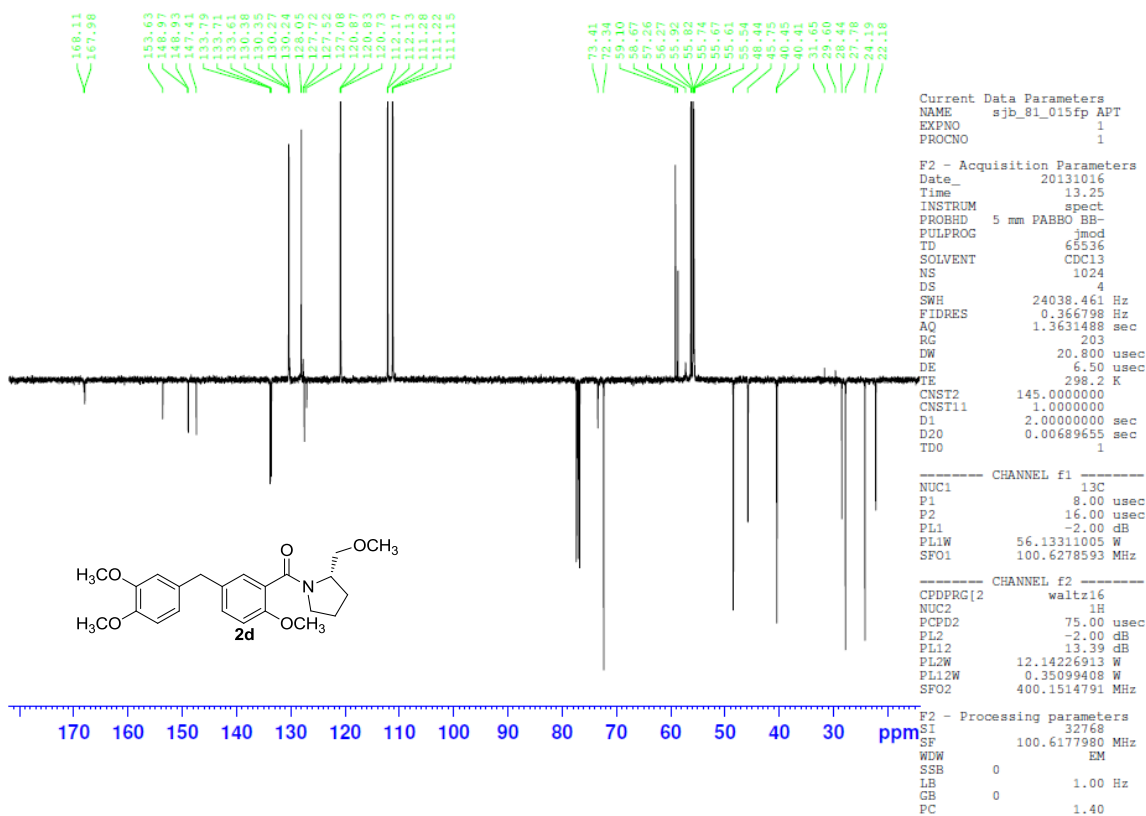

Area Percent Report

Data Path : C:\msdchem\1\DATA\  
Data File : sjb\_81\_015fp2.D  
Acq On : 11 Oct 2013 15:54  
Operator : sjb  
Sample : sjb\_81\_015fp2  
Misc :  
ALS Vial : 90 Sample Multiplier: 1

Integration Parameters: atuneWPMMar14.e  
Integrator: ChemStation

Method : C:\msdchem\1\METHODS\ckr3.m  
Title :

Signal : TIC: sjb\_81\_015fp2.D\data.ms

| peak<br># | R.T.<br>min | first<br>scan | max<br>scan | last<br>scan | PK<br>TY | peak<br>height | corr.<br>area | corr.<br>% max. | % of<br>total |
|-----------|-------------|---------------|-------------|--------------|----------|----------------|---------------|-----------------|---------------|
| 1         | 15.643      | 1895          | 1933        | 1951         | BV       | 864446         | 36310266      | 100.00%         | 100.000%      |

Sum of corrected areas: 36310266

ckr3.m Wed Mar 19 11:39:48 2014

Abundance

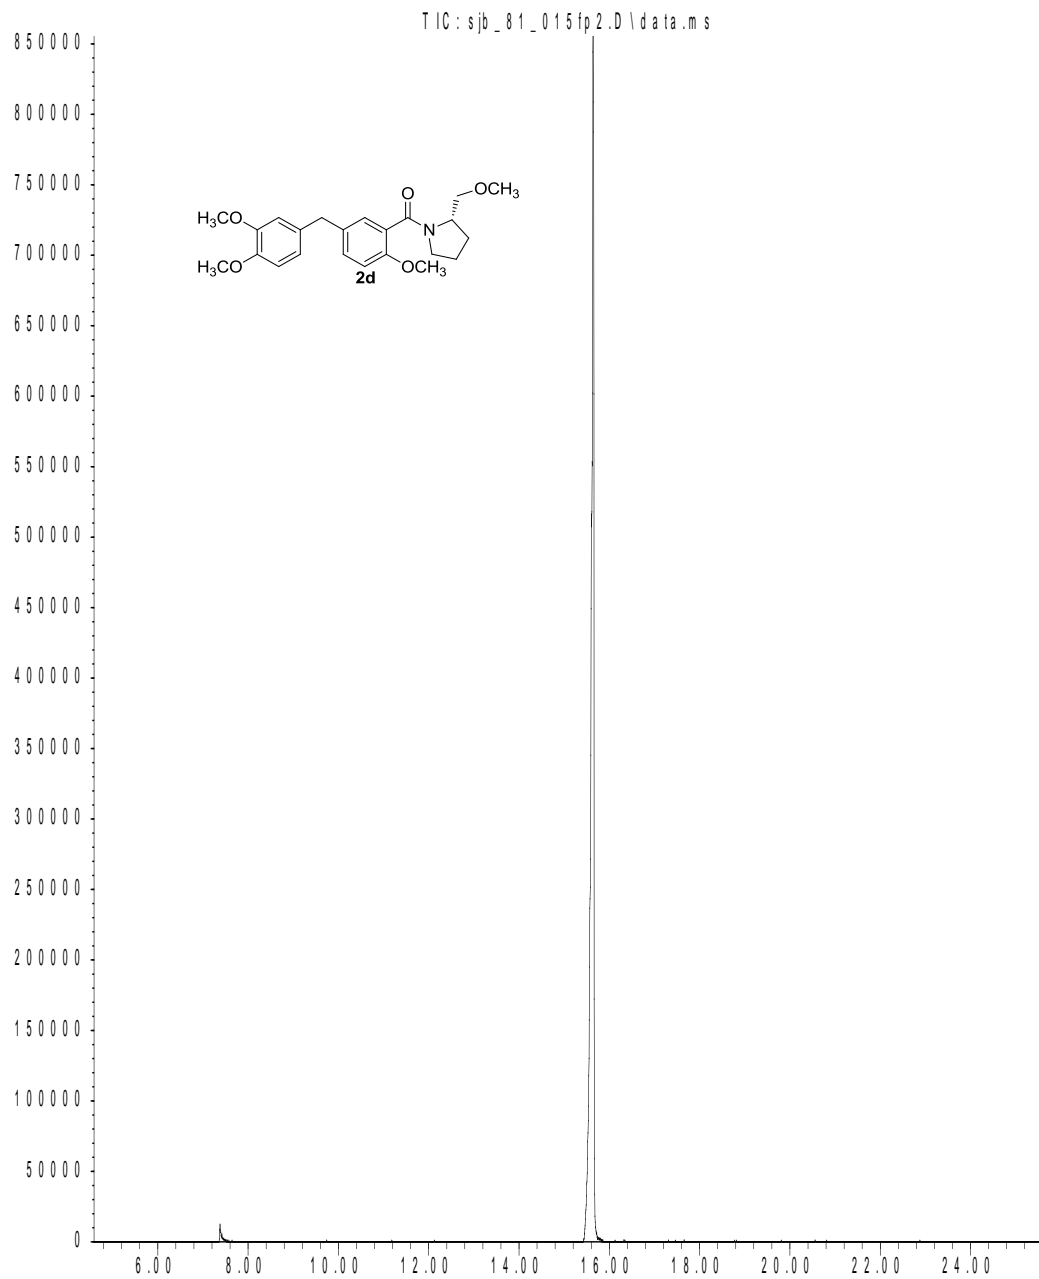

Time -->

Abundance

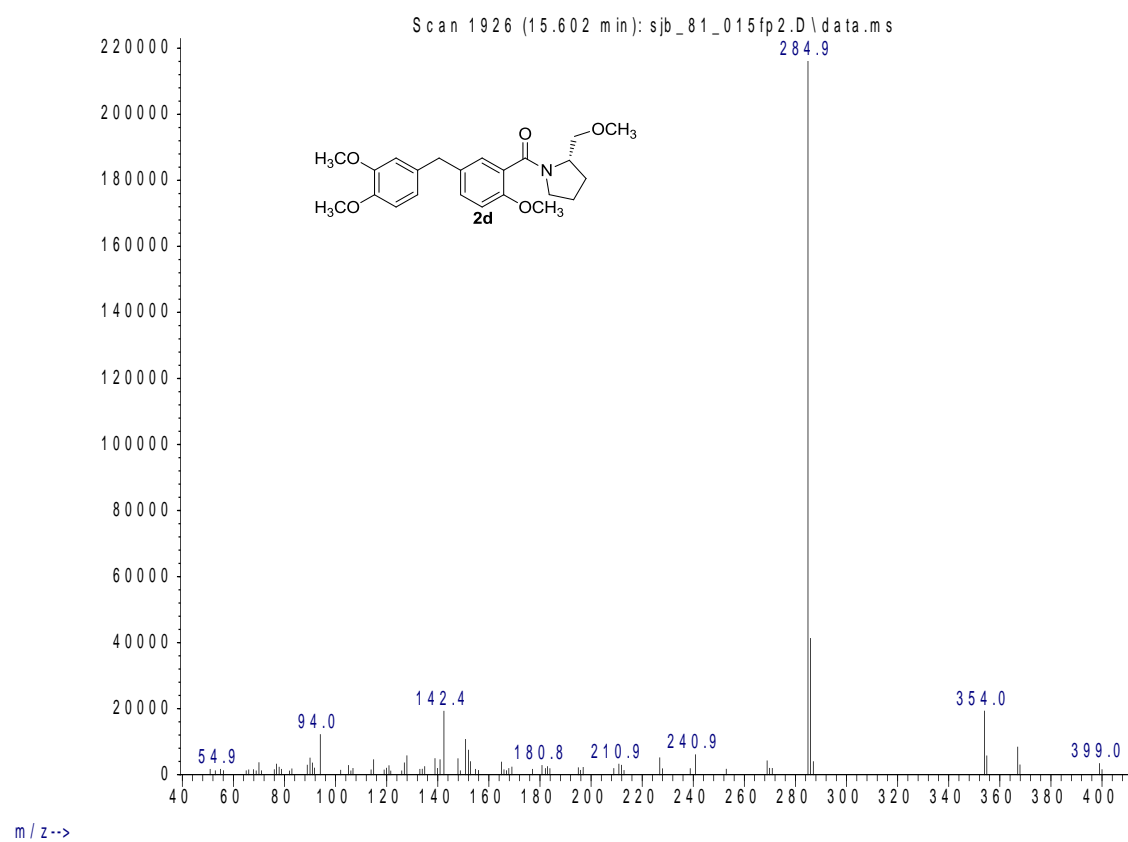

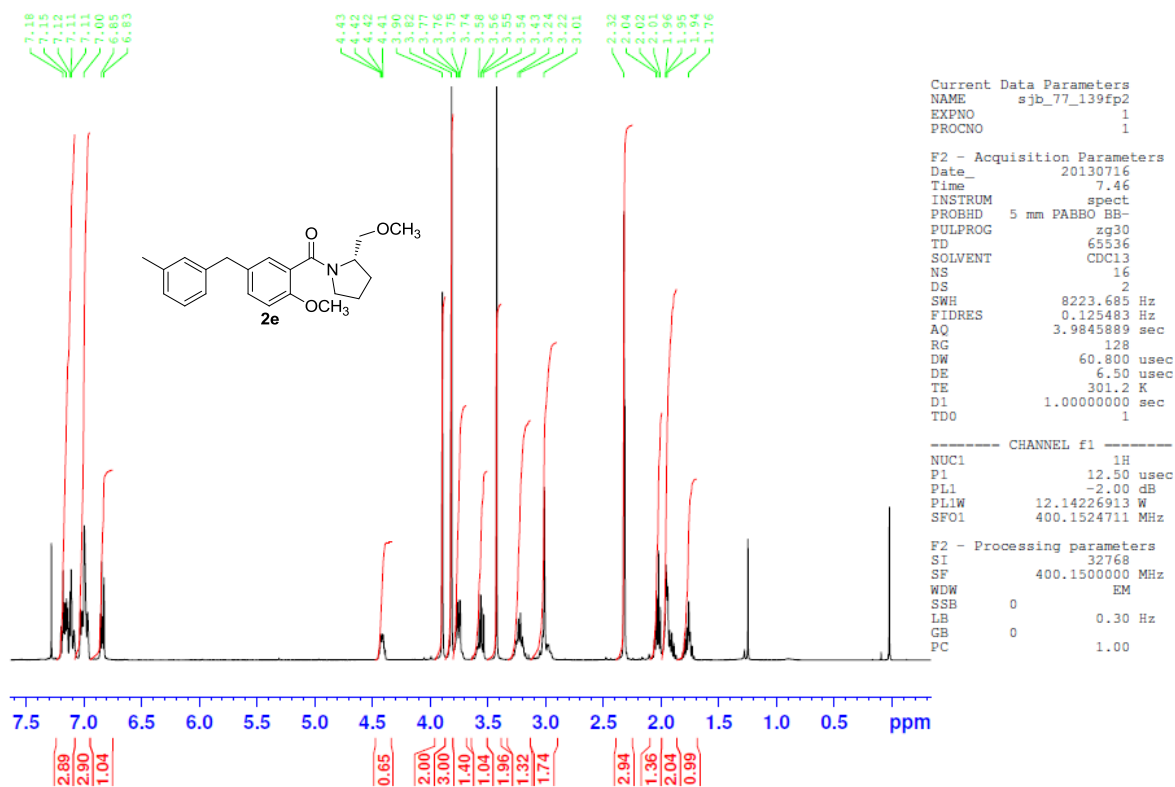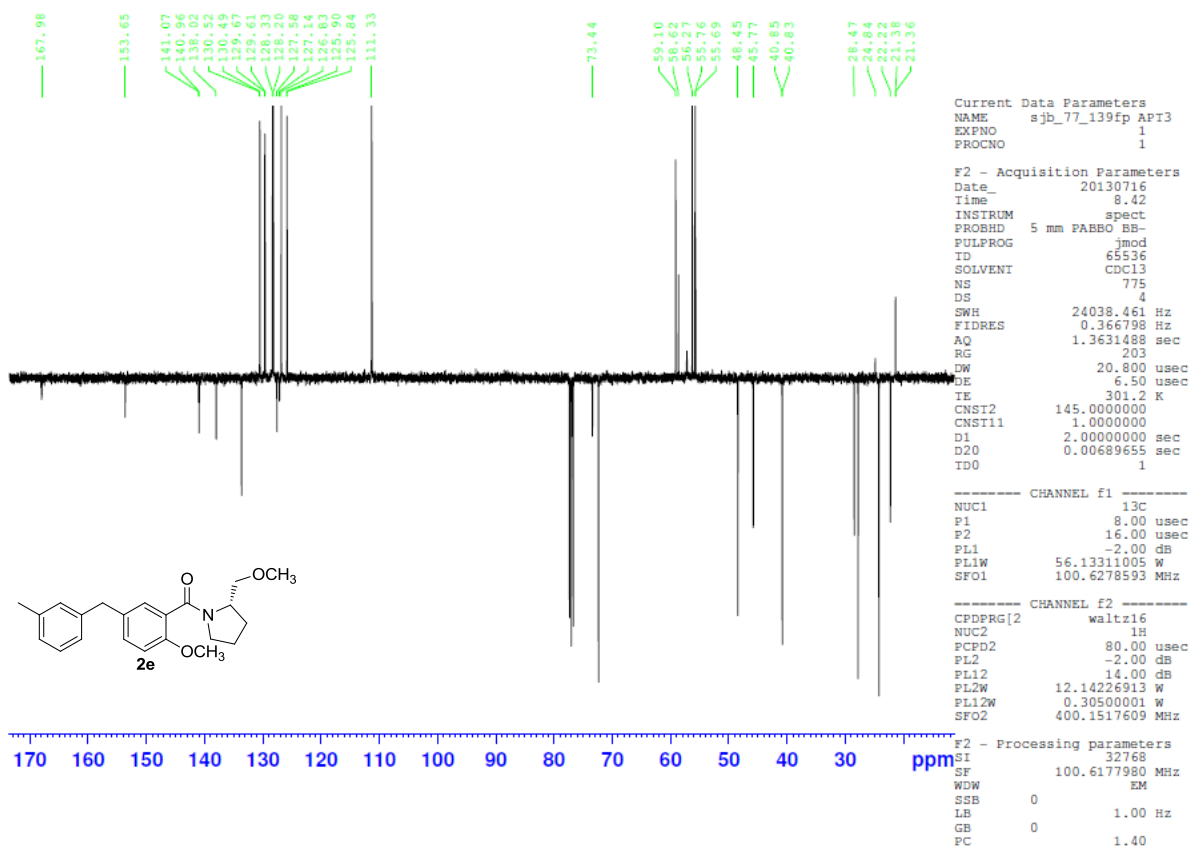

# Area Percent Report

Data Path : C:\msdchem\1\DATA\  
 Data File : sjb\_77\_139fp.D  
 Acq On : 8 Jul 2013 9:53  
 Operator : ep  
 Sample : sjb\_77\_139fp  
 Misc :  
 ALS Vial : 90 Sample Multiplier: 1

Integration Parameters: autoint1.e  
 Integrator: ChemStation

Method : C:\msdchem\1\5973N\PRECISION.M  
 Title :

Signal : TIC: sjb\_77\_139fp.D\data.ms

| peak<br># | R.T.<br>min | first<br>scan | max<br>scan | last<br>scan | PK<br>TY | peak<br>height | corr.<br>area | corr.<br>% max. | % of<br>total |
|-----------|-------------|---------------|-------------|--------------|----------|----------------|---------------|-----------------|---------------|
| 1         | 7.929       | 561           | 585         | 599          | BV       | 28577          | 573288        | 0.06%           | 0.056%        |
| 2         | 8.475       | 675           | 680         | 704          | BV 3     | 44818          | 1476917       | 0.15%           | 0.144%        |
| 3         | 11.749      | 1236          | 1253        | 1264         | PV 4     | 20623          | 556794        | 0.06%           | 0.054%        |
| 4         | 12.282      | 1323          | 1346        | 1410         | PV 2     | 33061394       | 1005291419    | 100.00%         | 98.150%       |
| 5         | 12.662      | 1410          | 1412        | 1429         | VV 8     | 191146         | 9977408       | 0.99%           | 0.974%        |
| 6         | 12.770      | 1429          | 1431        | 1452         | VB 8     | 109101         | 6364368       | 0.63%           | 0.621%        |

Sum of corrected areas: 1024240193

Abundance

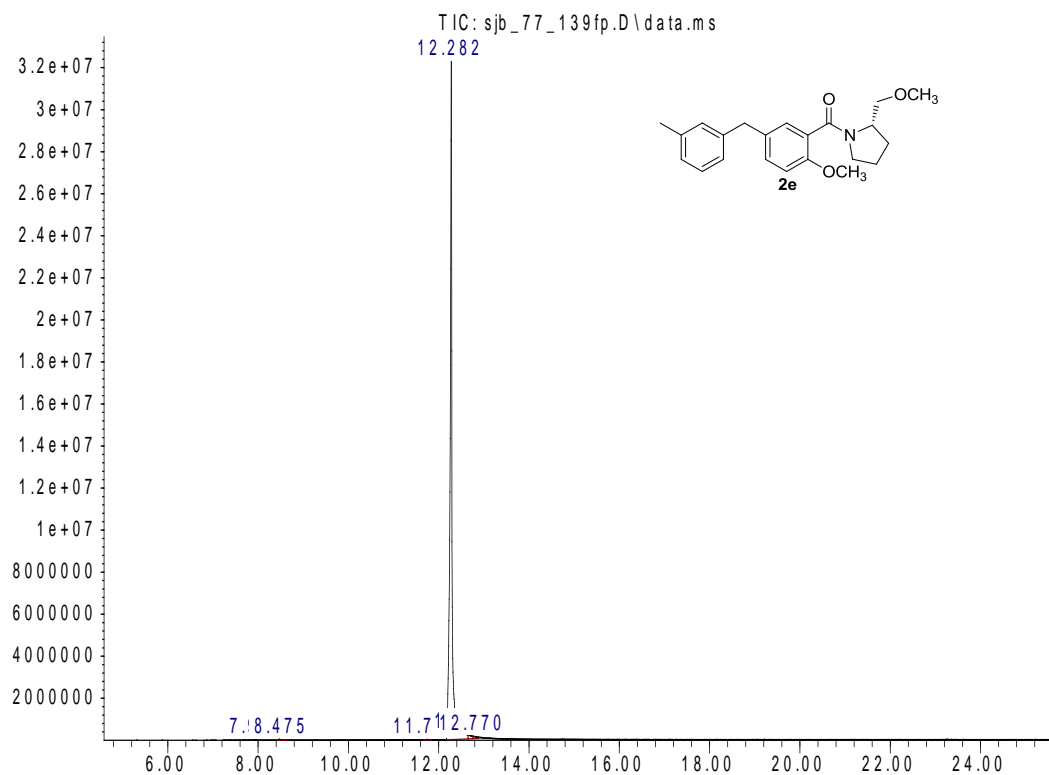

Time-->

Abundance

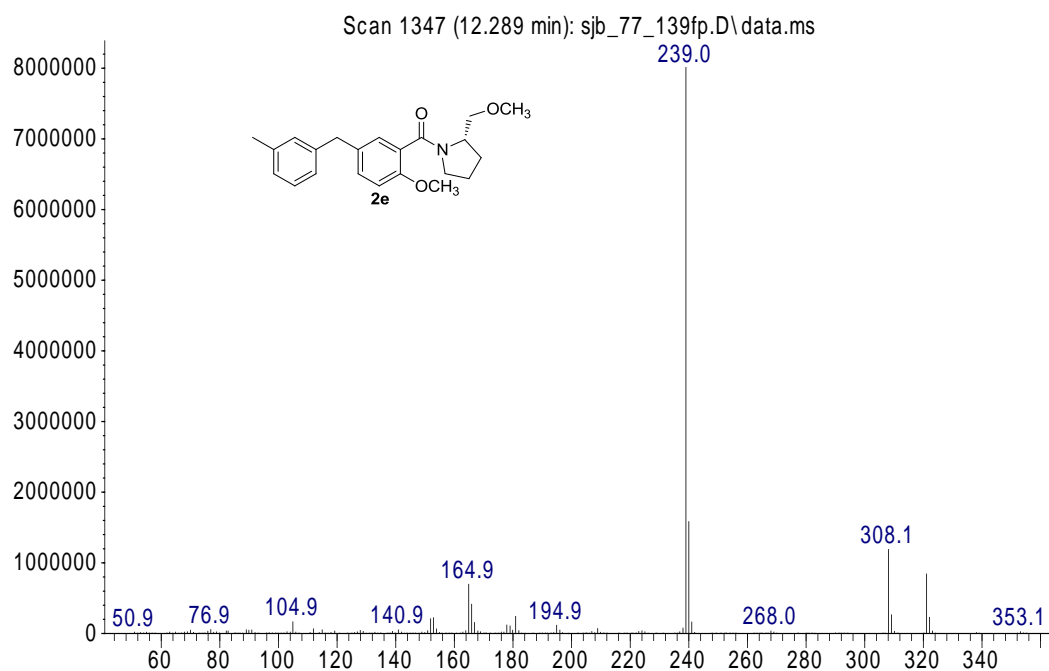

m/z-->

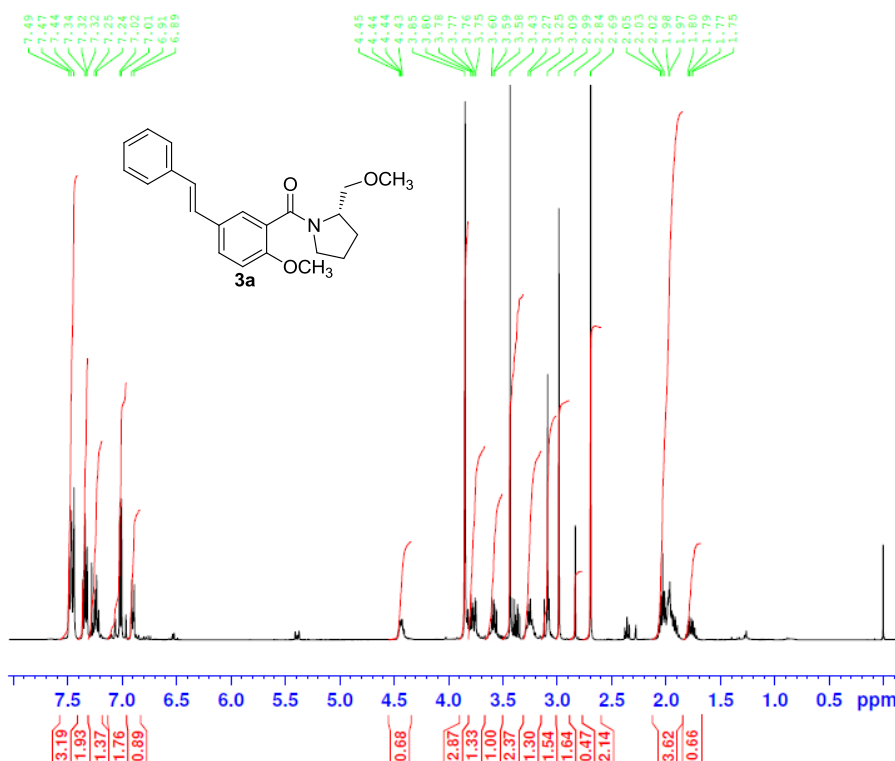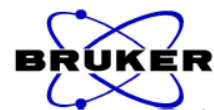

NAME sjb\_74\_196  
 EXPNO 1  
 PROCNO 1  
 Date\_ 20130712  
 Time 8.37  
 INSTRUM spect  
 PROBHD 5 mm PABBO BB-  
 PULPROG zg30  
 TD 65536  
 SOLVENT CDCl3  
 NS 16  
 DS 2  
 SWH 8223.685 Hz  
 FIDRES 0.125483 Hz  
 AQ 3.9846387 sec  
 RG 50.8  
 DW 60.800 usec  
 DE 6.50 usec  
 TE 301.2 K  
 D1 1.00000000 sec  
 TDO 1

----- CHANNEL f1 -----  
 NUC1 1H  
 P1 12.50 usec  
 PL1 -2.00 dB  
 PL1W 12.14226913 W  
 SFO1 400.1524711 MHz  
 SI 32768  
 SF 400.1500000 MHz  
 WDW EM  
 SSB 0  
 LB 0.30 Hz  
 GB 0  
 PC 1.00

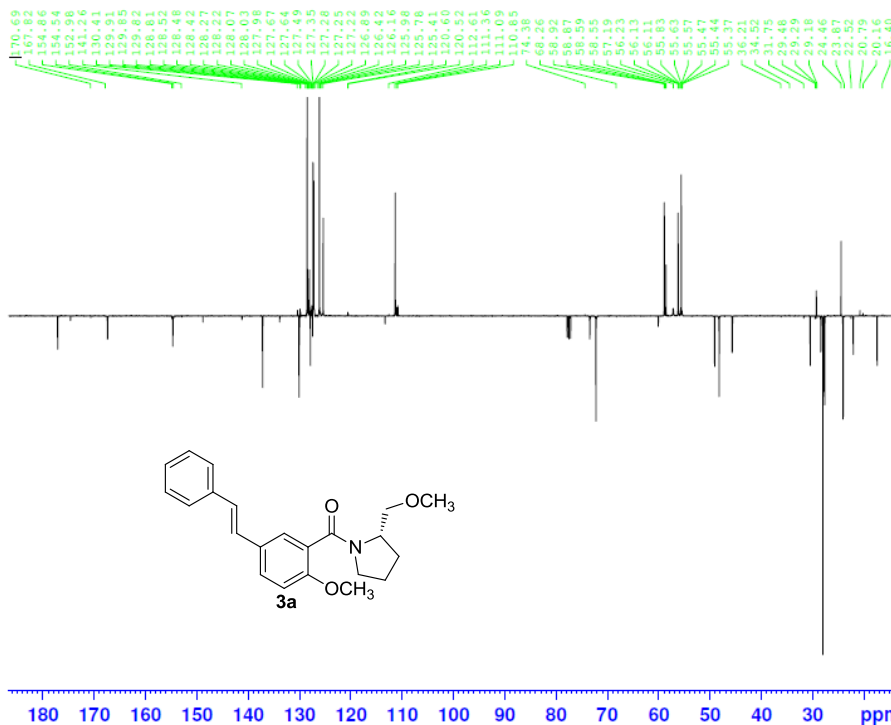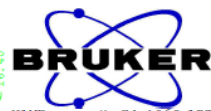

NAME sjb\_74\_196fpAPT  
 EXPNO 1  
 PROCNO 1  
 Date\_ 20121107  
 Time 10.01  
 INSTRUM spect  
 PROBHD 5 mm PABBO BB-  
 PULPROG jmod  
 TD 65536  
 SOLVENT CDCl3  
 NS 704  
 DS 4  
 SWH 17482.518 Hz  
 FIDRES 0.266762 Hz  
 AQ 1.8743796 sec  
 RG 203  
 DW 28.600 usec  
 DE 6.50 usec  
 TE 301.2 K  
 CNST2 145.0000000  
 CNST11 1.0000000  
 D1 2.00000000 sec  
 D20 0.00689655 sec  
 TDO 1

----- CHANNEL f1 -----  
 NUC1 13C  
 P1 8.00 usec  
 P2 16.00 usec  
 PL1 -2.00 dB  
 PL1W 56.13311005 W  
 SFO1 100.6278332 MHz

----- CHANNEL f2 -----  
 CPDPRG2 waltz16  
 NUC2 1H  
 PCPD2 80.00 usec  
 PL2 -2.00 dB  
 PL12 14.00 dB  
 PL2W 12.14226913 W  
 PL12W 0.30500001 W  
 SFO2 400.1514494 MHz  
 SI 32768  
 SF 100.6177980 MHz  
 WDW EM  
 SSB 0  
 LB 1.00 Hz  
 GB 0  
 PC 1.40

# Area Percent Report

Data Path : C:\msdchem\1\DATA\  
Data File : sjb\_74\_196fp.D  
Acq On : 6 Nov 2012 17:26  
Operator : sjb  
Sample : sjb\_74\_196fp  
Misc :  
ALS Vial : 5 Sample Multiplier: 1

Integration Parameters: autoint1.e  
Integrator: ChemStation

Method : C:\msdchem\1\METHODS\JMB2.m  
Title :

Signal : TIC: sjb\_74\_196fp.D\data.ms

| peak<br># | R.T.<br>min | first<br>scan | max<br>scan | last<br>scan | PK<br>TY | peak<br>height | corr.<br>area | corr.<br>% max. | % of<br>total |
|-----------|-------------|---------------|-------------|--------------|----------|----------------|---------------|-----------------|---------------|
| 1         | 7.958       | 585           | 590         | 614          | BV       | 93249          | 2391488       | 0.67%           | 0.638%        |
| 2         | 12.347      | 1348          | 1357        | 1377         | BV 2     | 754583         | 16444164      | 4.62%           | 4.385%        |
| 3         | 15.286      | 1828          | 1871        | 1901         | BV       | 6269080        | 356146758     | 100.00%         | 94.977%       |

Sum of corrected areas: 374982409

JMB2.m Mon Nov 12 09:46:30 2012

Abundance

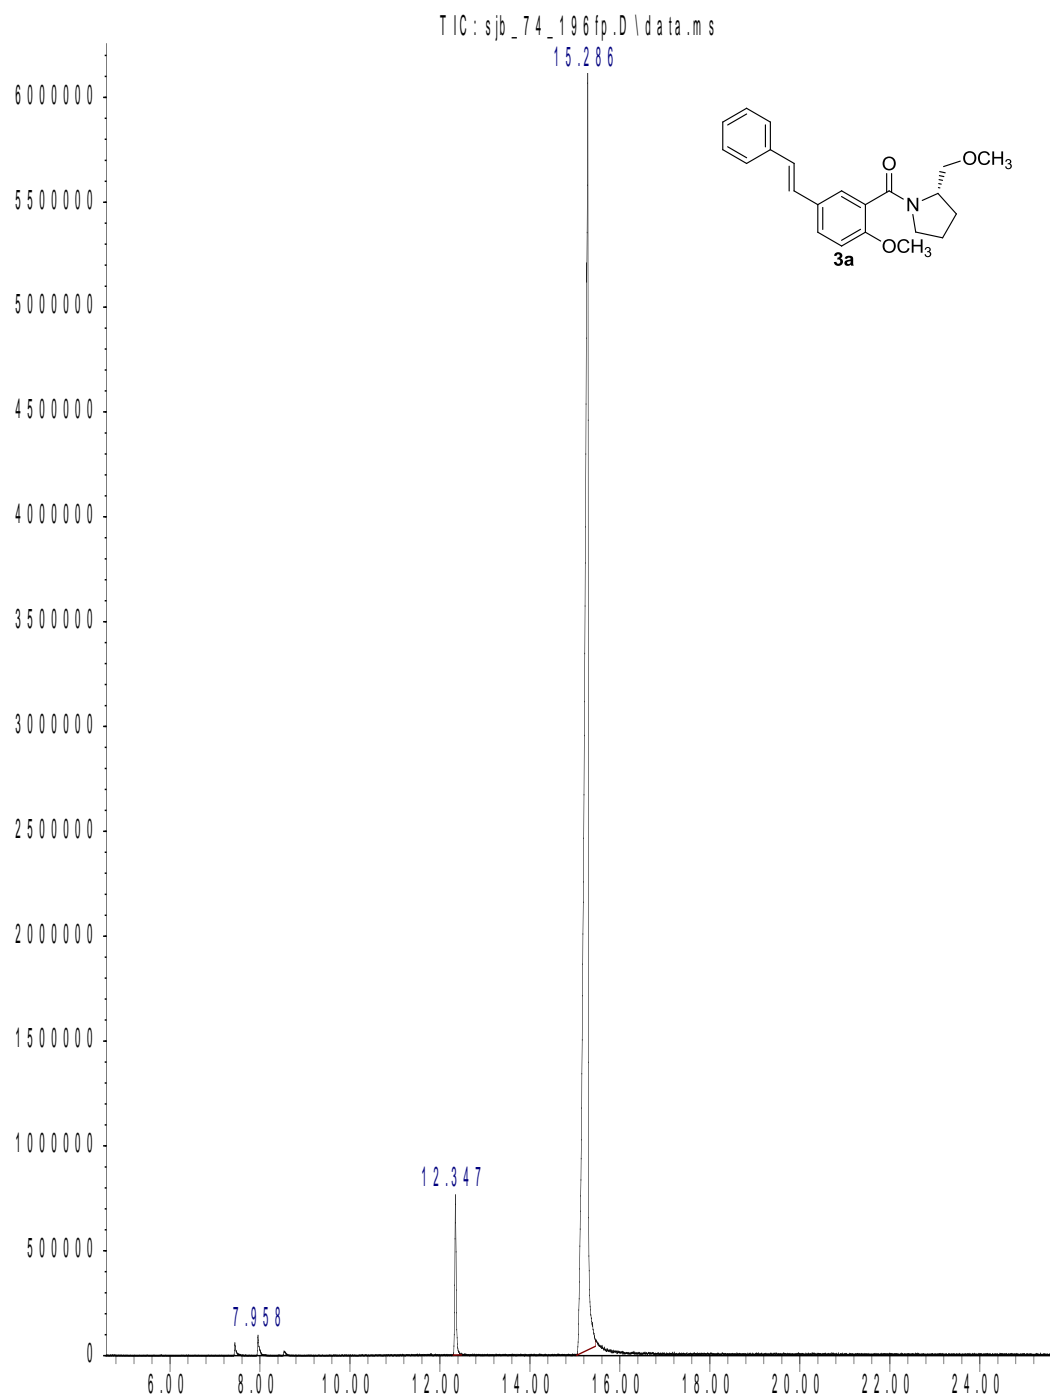

Time-->

Abundance

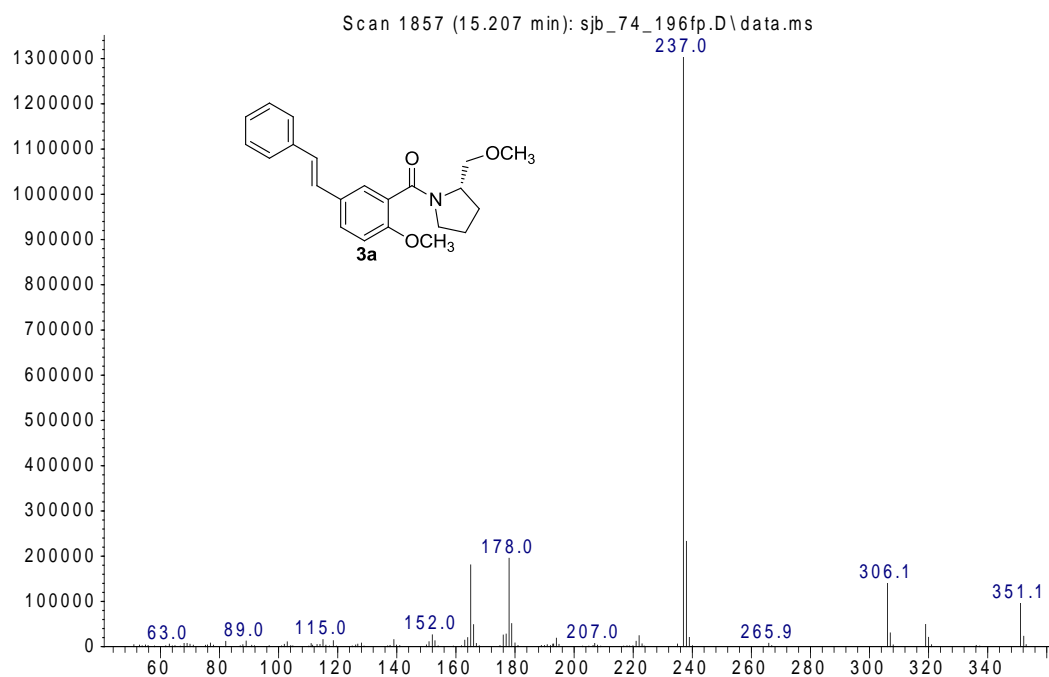

m/z-->

Abundance

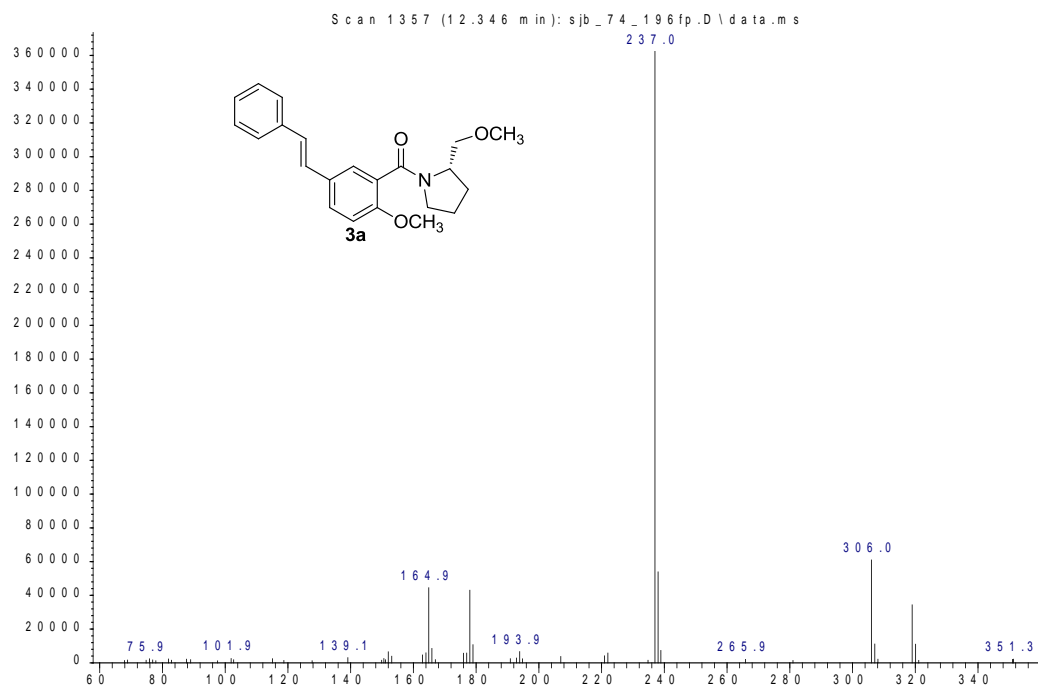

m / z-->

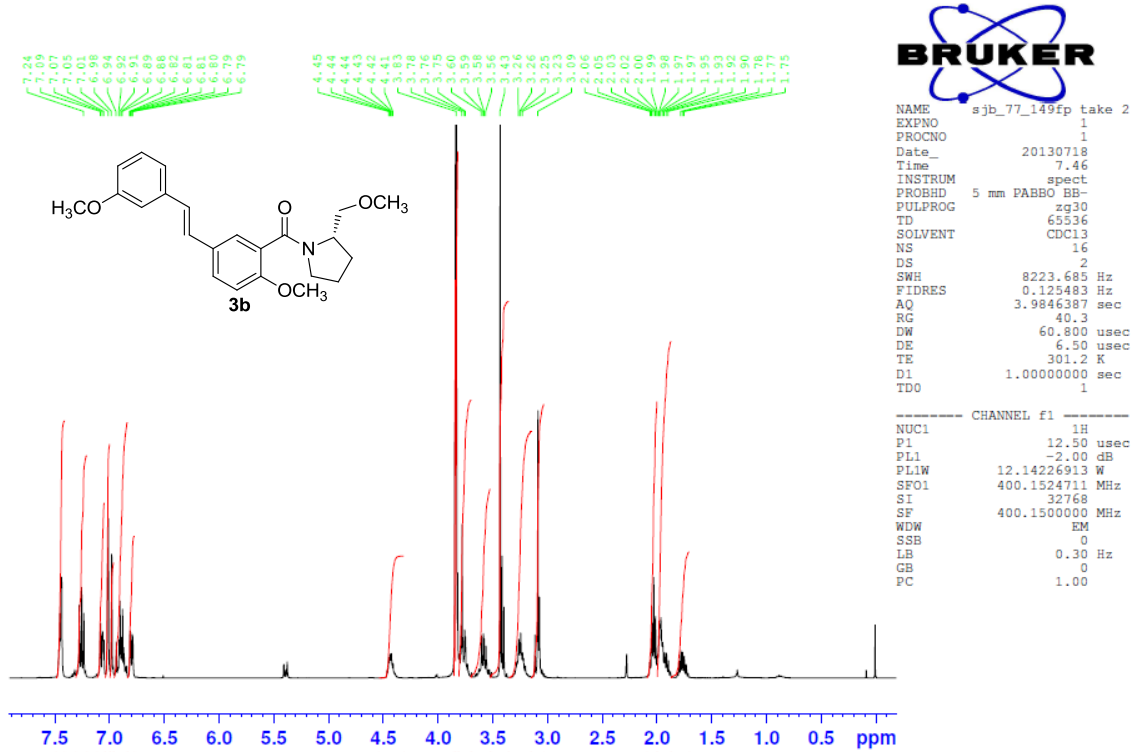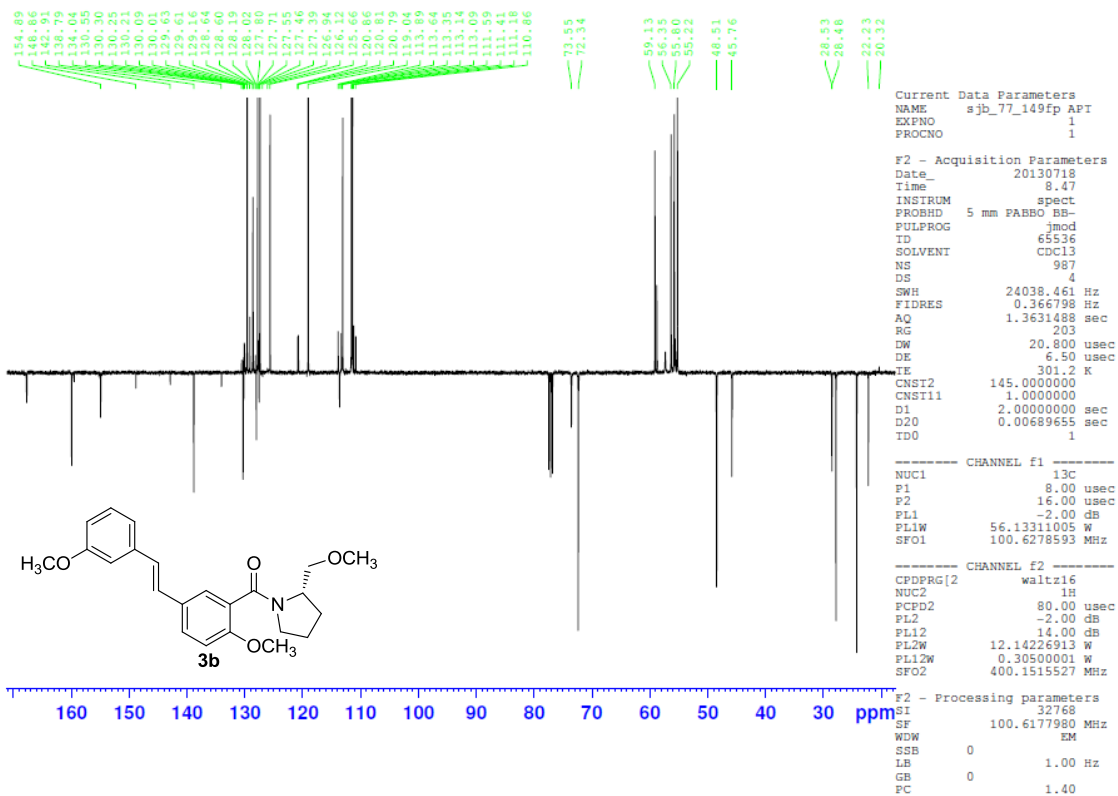

# Area Percent Report

Data Path : C:\msdchem\1\DATA\  
 Data File : sjb\_74\_028fp.D  
 Acq On : 12 Jun 2012 15:29  
 Operator : sjb  
 Sample : sjb\_74\_028fp  
 Misc :  
 ALS Vial : 35 Sample Multiplier: 1

Integration Parameters: autoint1.e  
 Integrator: ChemStation

Method : C:\msdchem\1\METHODS\JMB2.m  
 Title :

Signal : TIC: sjb\_74\_028fp.D\data.ms

| peak<br># | R.T.<br>min | first<br>scan | max<br>scan | last<br>scan | PK<br>TY | peak<br>height | corr.<br>area | corr.<br>% max. | % of<br>total |
|-----------|-------------|---------------|-------------|--------------|----------|----------------|---------------|-----------------|---------------|
| 1         | 7.428       | 492           | 498         | 537          | BV       | 394397         | 9499465       | 0.92%           | 0.856%        |
| 2         | 7.947       | 582           | 588         | 604          | BV       | 244367         | 4966452       | 0.48%           | 0.447%        |
| 3         | 8.506       | 678           | 686         | 715          | PV       | 133193         | 4366147       | 0.42%           | 0.393%        |
| 4         | 13.998      | 1627          | 1646        | 1657         | PV 2     | 34621          | 1132361       | 0.11%           | 0.102%        |
| 5         | 14.301      | 1680          | 1699        | 1726         | PV       | 1718437        | 52484842      | 5.09%           | 4.727%        |
| 6         | 19.994      | 2598          | 2694        | 2749         | PV       | 8203405        | 1030243382    | 100.00%         | 92.793%       |
| 7         | 20.316      | 2749          | 2750        | 2779         | VV 6     | 124068         | 7195565       | 0.70%           | 0.648%        |
| 8         | 20.491      | 2779          | 2781        | 2788         | VV 8     | 22518          | 375776        | 0.04%           | 0.034%        |

Sum of corrected areas: 1110263990

JMB2.m Wed Oct 17 15:12:44 2012

Abundance

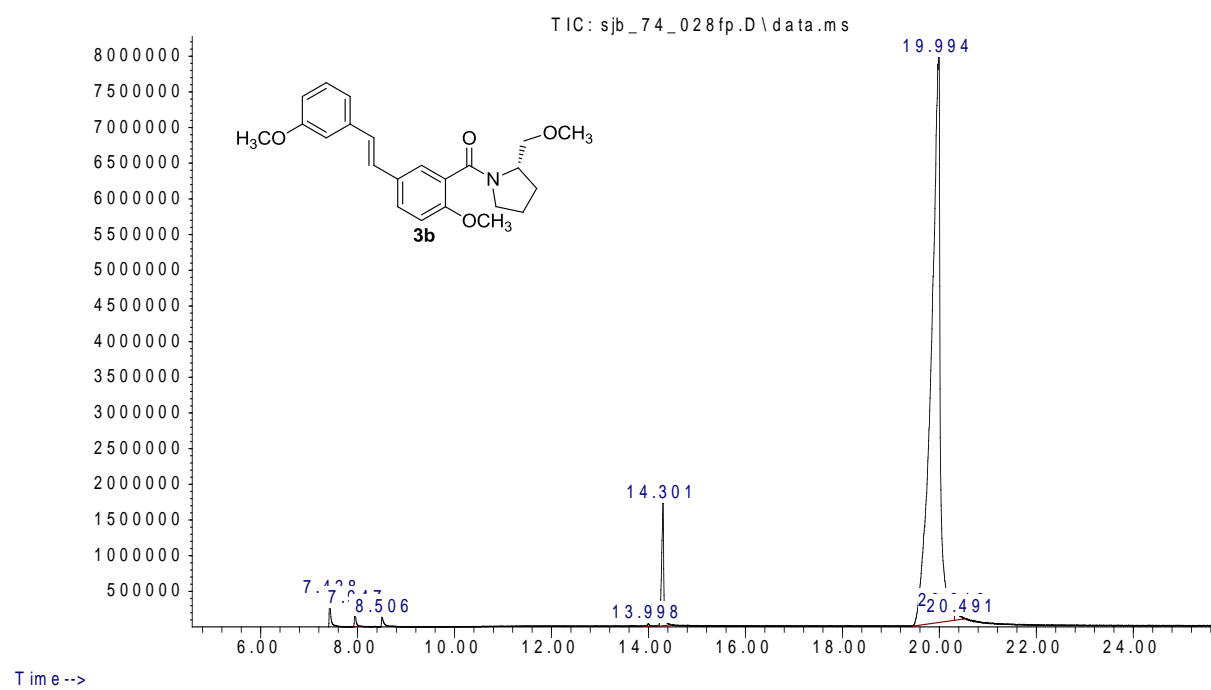

Abundance

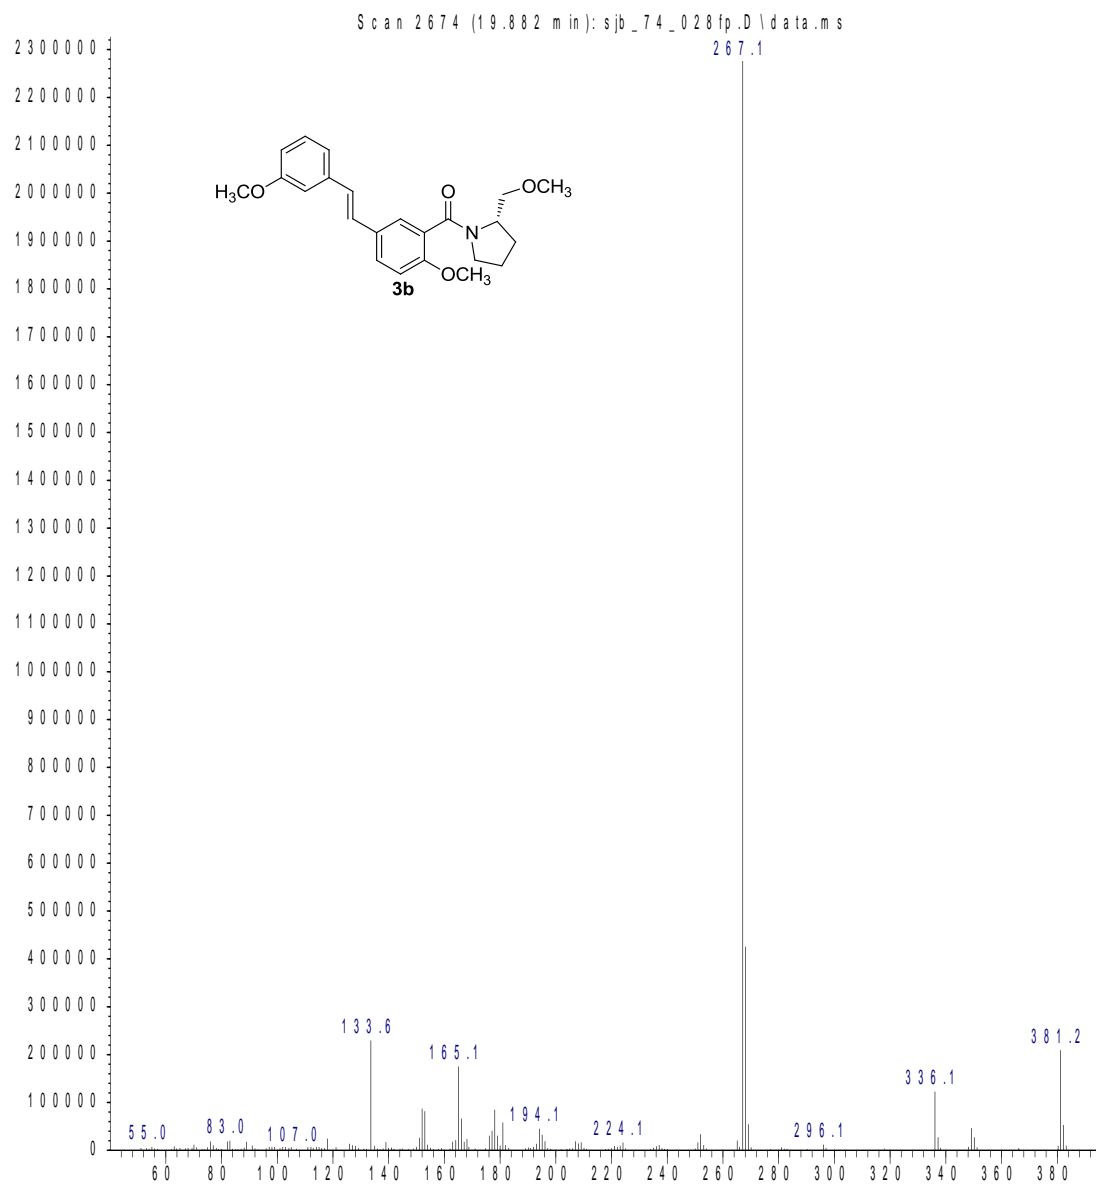

m/z-->

Abundance

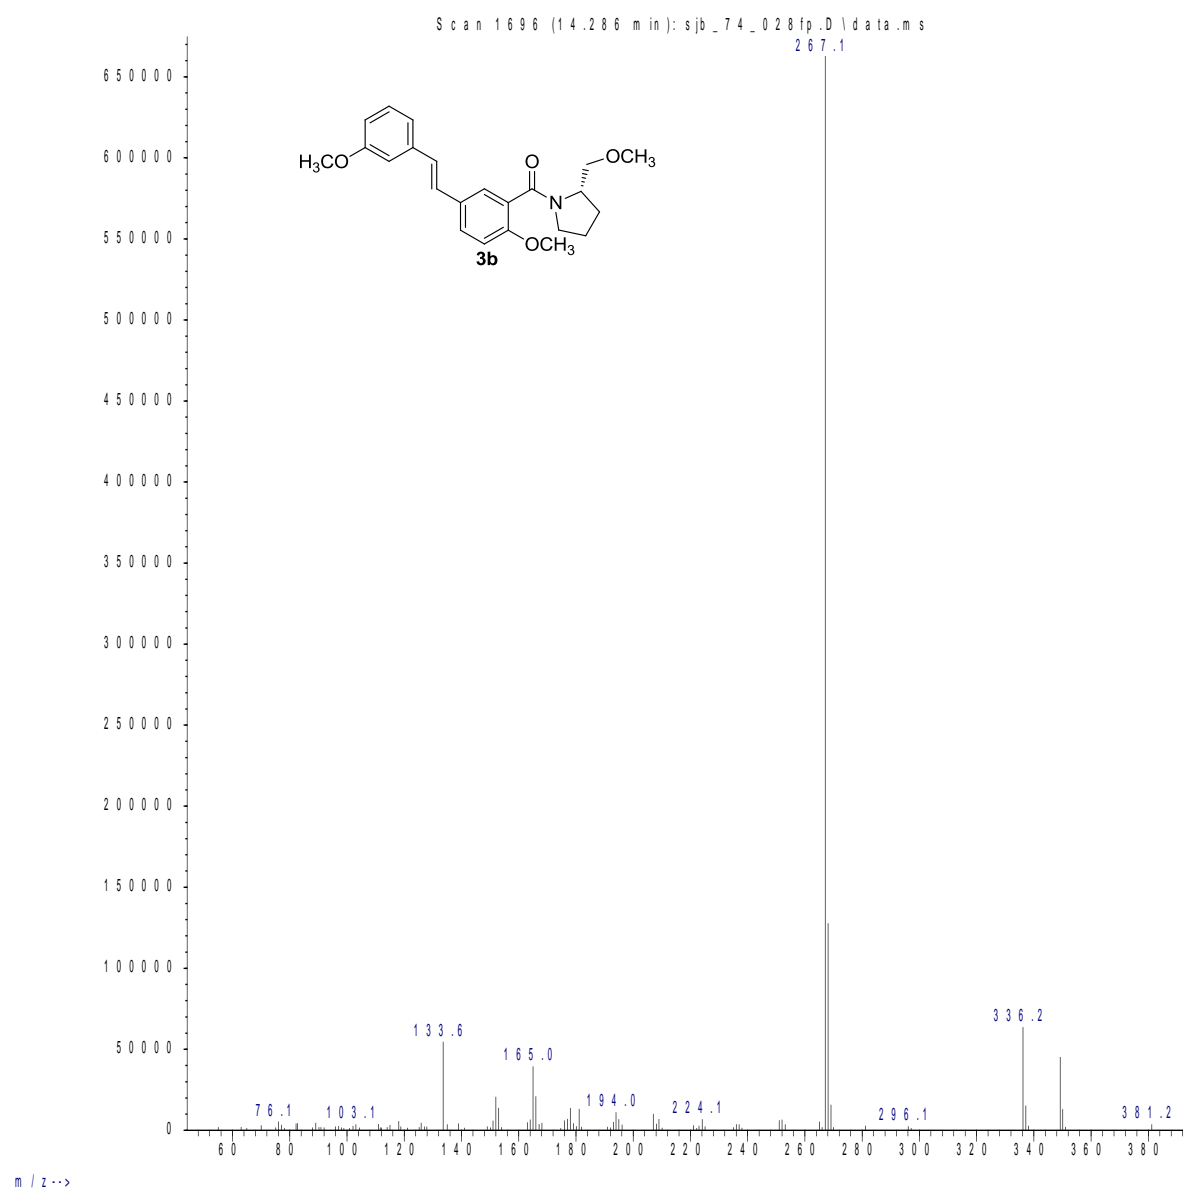

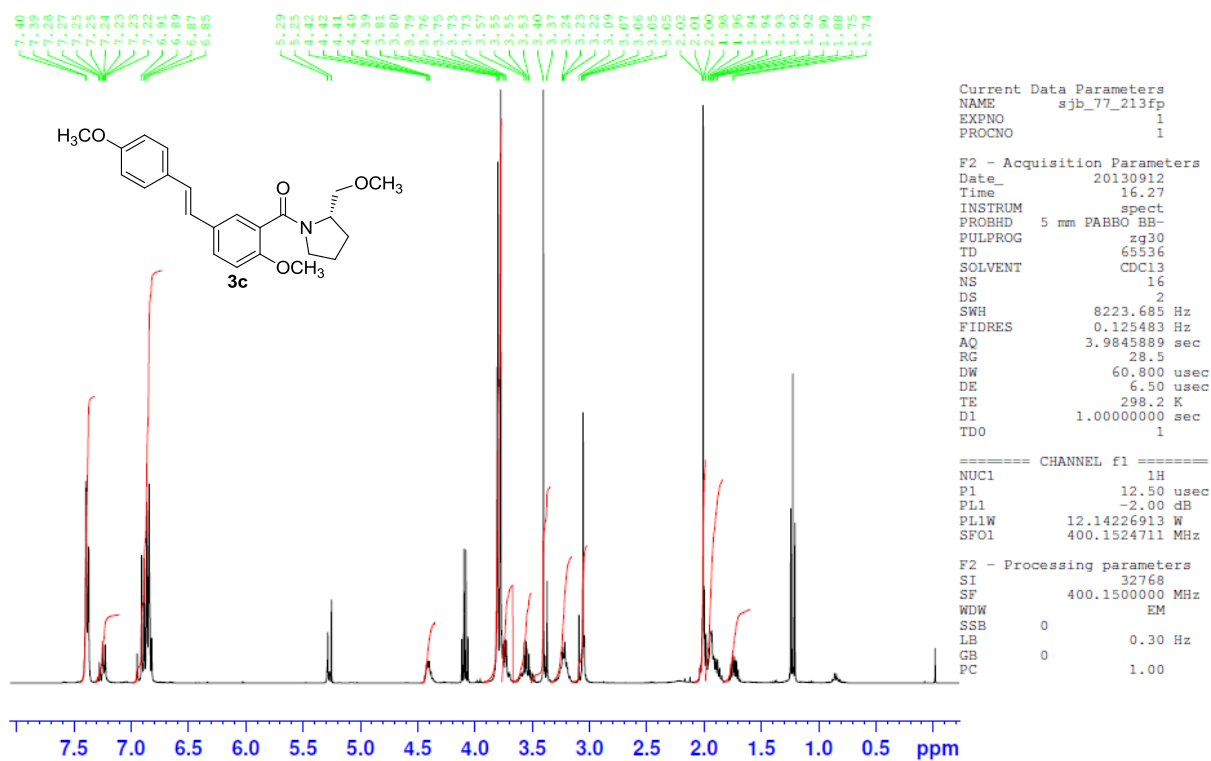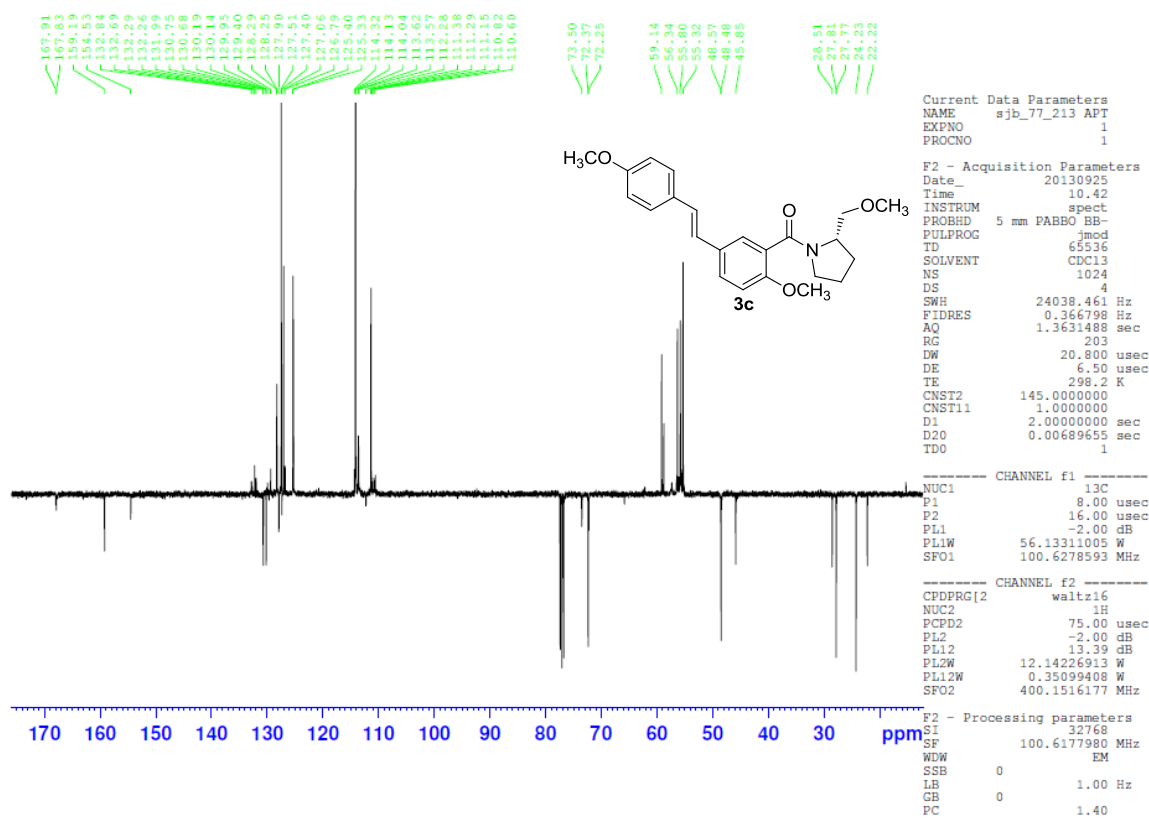

# Area Percent Report

Data Path : C:\msdchem\1\DATA\  
 Data File : ra\_67\_145a.D  
 Acq On : 16 Jul 2012 10:21  
 Operator : sm  
 Sample : ra\_67\_145a  
 Misc : Heck cross-coupling 5g scale  
 ALS Vial : 90 Sample Multiplier: 1

Integration Parameters: autoint1.e  
 Integrator: ChemStation

Method : C:\msdchem\1\METHODS\JMB2.m  
 Title :

Signal : TIC: ra\_67\_145a.D\data.ms

| peak<br># | R.T.<br>min | first<br>scan | max<br>scan | last<br>scan | PK<br>TY | peak<br>height | corr.<br>area | corr.<br>% max. | % of<br>total |
|-----------|-------------|---------------|-------------|--------------|----------|----------------|---------------|-----------------|---------------|
| 1         | 7.436       | 493           | 499         | 531          | BB       | 68422          | 1923647       | 0.52%           | 0.483%        |
| 2         | 7.951       | 583           | 589         | 625          | BB       | 92384          | 2825997       | 0.76%           | 0.710%        |
| 3         | 14.893      | 1783          | 1802        | 1846         | PB       | 630106         | 23380433      | 6.32%           | 5.873%        |
| 4         | 20.685      | 2710          | 2814        | 2910         | PV       | 3375196        | 369957456     | 100.00%         | 92.923%       |
| 5         | 21.251      | 2910          | 2913        | 2916         | VV 3     | 4131           | 44728         | 0.01%           | 0.011%        |

Sum of corrected areas: 398132262

JMB2.m Thu Nov 08 13:39:54 2012

Abundance

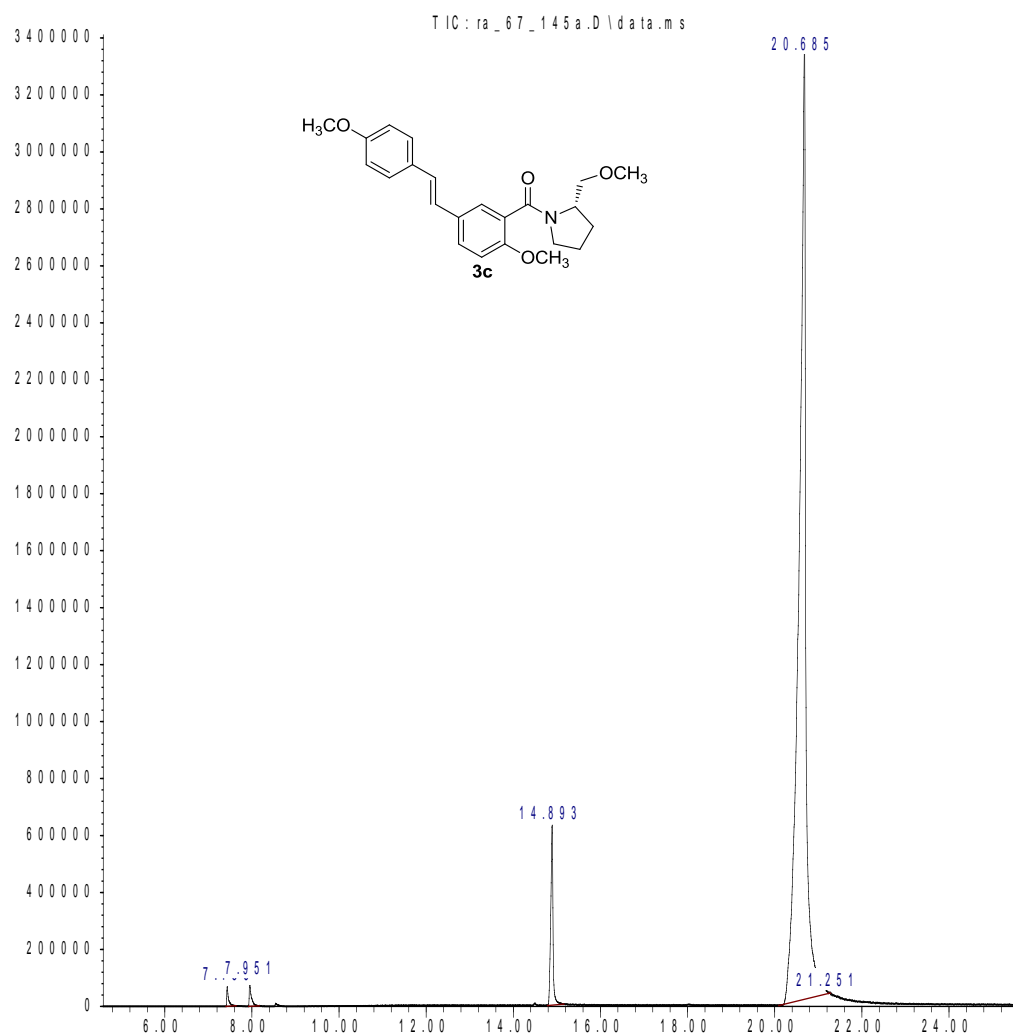

Time -->

Abundance

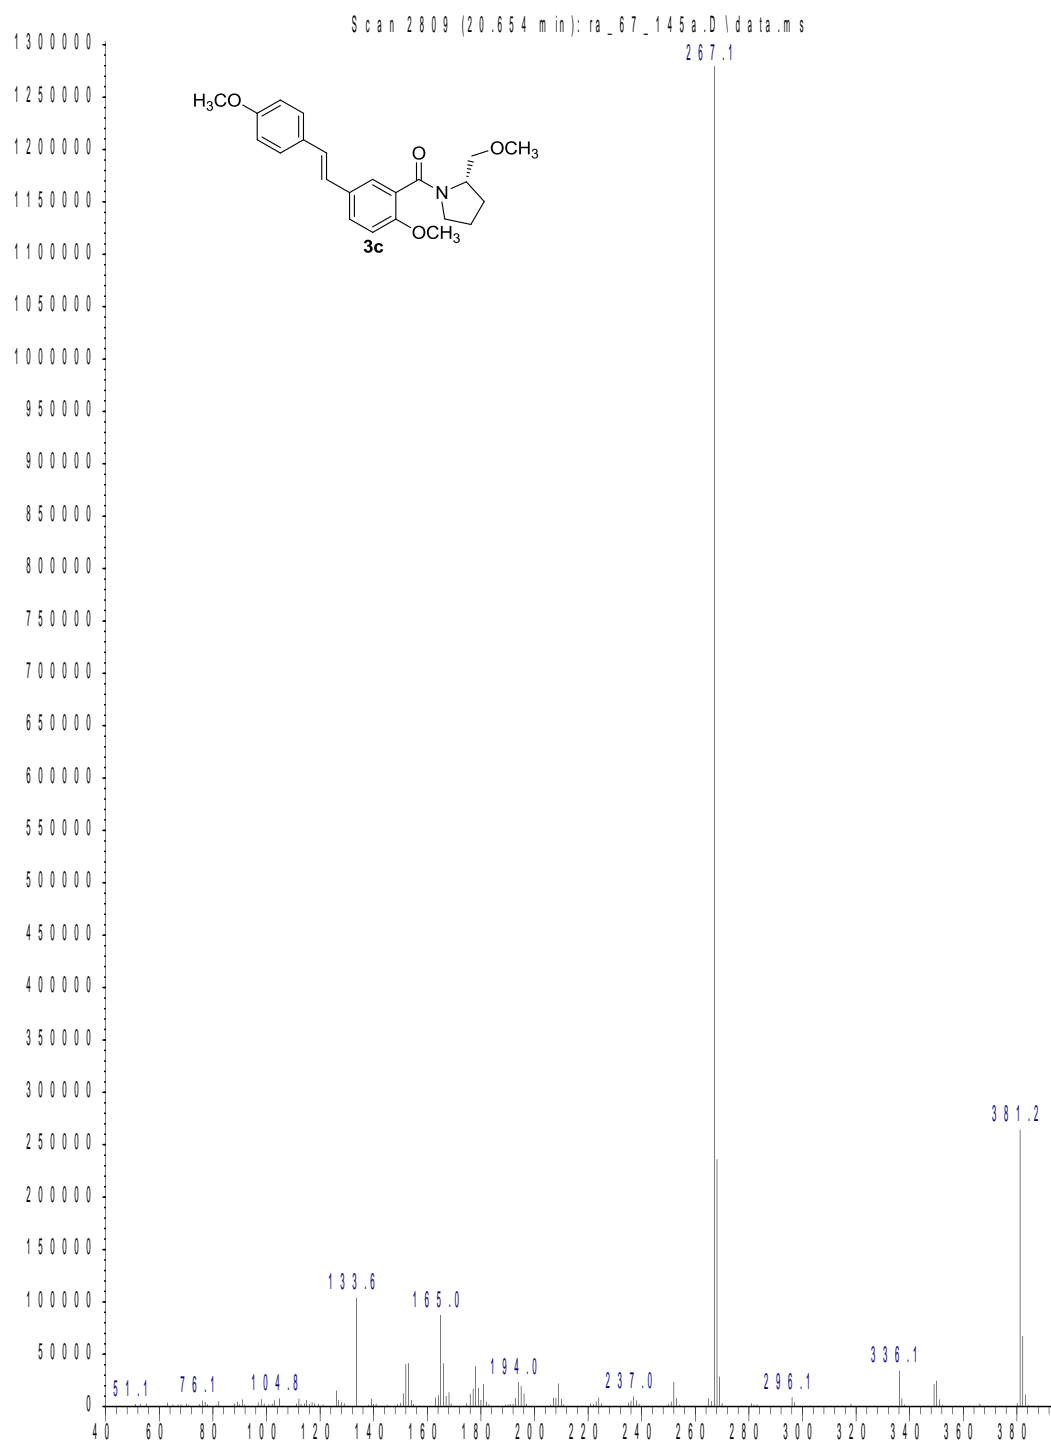

m/z >

Abundance

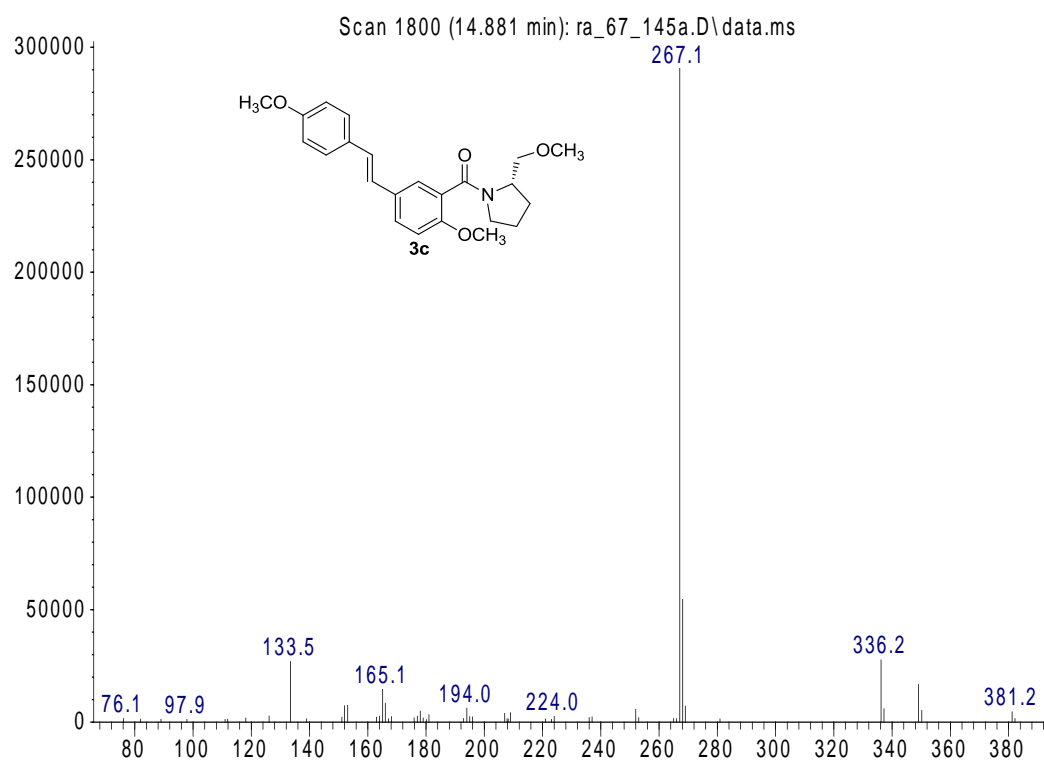

m/z-->

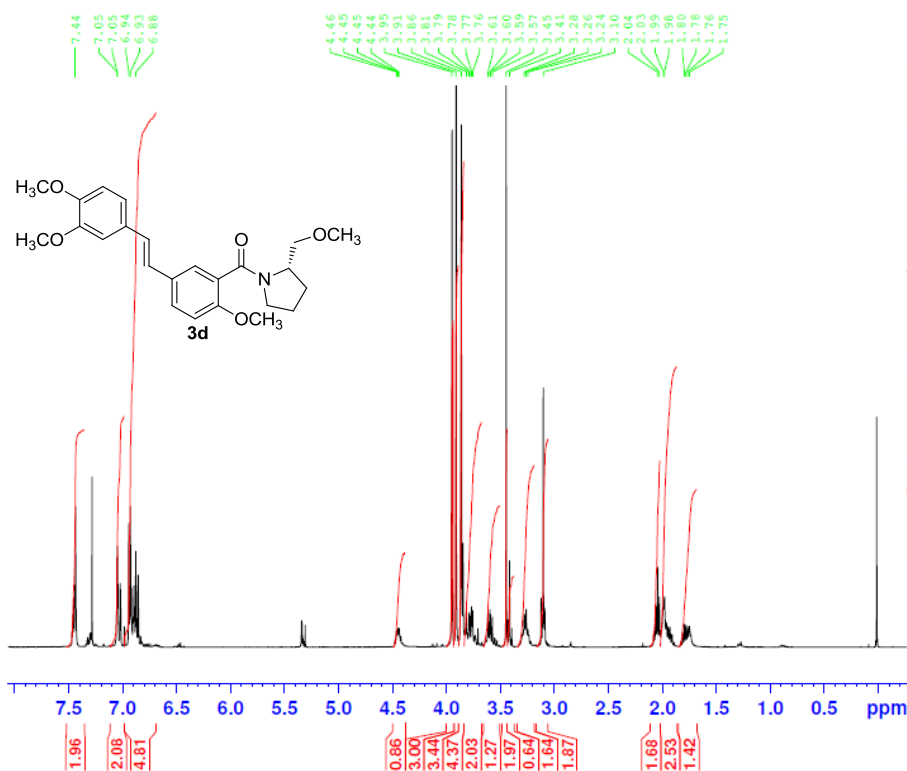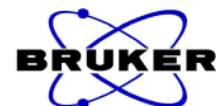

NAME sjb\_74\_208 take 2  
 EXPNO 1  
 PROCNO 1  
 Date\_ 20130711  
 Time 8.57  
 INSTRUM spect  
 PROBHD 5 mm PABBO BB-  
 PULPROG zg30  
 TD 65536  
 SOLVENT CDCl3  
 NS 16  
 DS 2  
 SWH 8223.685 Hz  
 FIDRES 0.125483 Hz  
 AQ 3.9846387 sec  
 RG 144  
 DW 60.800 usec  
 DE 6.50 usec  
 TE 301.2 K  
 D1 1.00000000 sec  
 TDO 1

CHANNEL f1  
 NUC1 1H  
 P1 12.50 usec  
 PL1 -2.00 dB  
 PL1W 12.14226913 W  
 SFO1 400.1524711 MHz  
 SI 32768  
 SF 400.1500000 MHz  
 WDW EM  
 SSB 0  
 LB 0.30 Hz  
 GB 0  
 PC 1.00

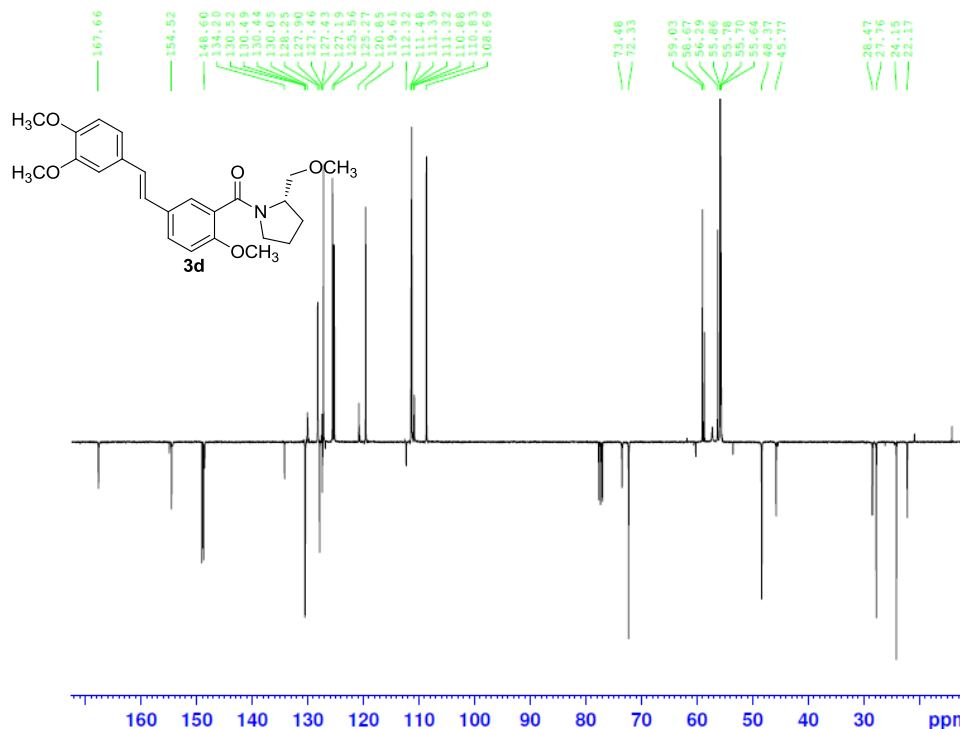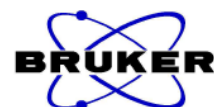

NAME sjb\_74\_208fp APT  
 EXPNO 1  
 PROCNO 1  
 Date\_ 20121116  
 Time 15.52  
 INSTRUM spect  
 PROBHD 5 mm PABBO BB-  
 PULPROG jmod  
 TD 65536  
 SOLVENT CDCl3  
 NS 1024  
 DS 4  
 SWH 16233.767 Hz  
 FIDRES 0.247708 Hz  
 AQ 2.0185587 sec  
 RG 203  
 DW 30.800 usec  
 DE 6.50 usec  
 TE 301.2 K  
 CNST2 145.0000000  
 CNST11 1.0000000  
 D1 2.00000000 sec  
 D20 0.00689655 sec  
 TDO 1

CHANNEL f1  
 NUC1 13C  
 P1 8.00 usec  
 P2 16.00 usec  
 PL1 -2.00 dB  
 PL1W 56.13311005 W  
 SFO1 100.6270320 MHz

CHANNEL f2  
 CPDPRG2 waltz16  
 NUC2 1H  
 PCPD2 80.00 usec  
 PL2 -2.00 dB  
 PL12 14.00 dB  
 PL2W 12.14226913 W  
 PL12W 0.30500001 W  
 SFO2 400.1515194 MHz  
 SI 32768  
 SF 100.6177980 MHz  
 WDW EM  
 SSB 0  
 LB 1.00 Hz  
 GB 0  
 PC 1.40

# Area Percent Report

Data Path : C:\msdchem\1\DATA\  
 Data File : sjb\_77\_169fp.D  
 Acq On : 7 Aug 2013 10:34  
 Operator : sjb  
 Sample : sjb\_77\_169fp  
 Misc :  
 ALS Vial : 85 Sample Multiplier: 1

Integration Parameters: autoint1.e  
 Integrator: ChemStation

Method : C:\msdchem\1\5973N\PRECISION.M  
 Title :

Signal : TIC: sjb\_77\_169fp.D\data.ms

| peak<br># | R.T.<br>min | first<br>scan | max<br>scan | last<br>scan | PK<br>TY | peak<br>height | corr.<br>area | corr.<br>% max. | % of<br>total |
|-----------|-------------|---------------|-------------|--------------|----------|----------------|---------------|-----------------|---------------|
| 1         | 7.377       | 483           | 489         | 520          | BB       | 282995         | 8369318       | 3.14%           | 2.755%        |
| 2         | 16.656      | 2082          | 2110        | 2130         | PV       | 744590         | 29079588      | 10.92%          | 9.574%        |
| 3         | 25.844      | 3611          | 3716        | 3752         | BV 3     | 1917900        | 266290676     | 100.00%         | 87.671%       |

Sum of corrected areas: 303739582

## Abundance

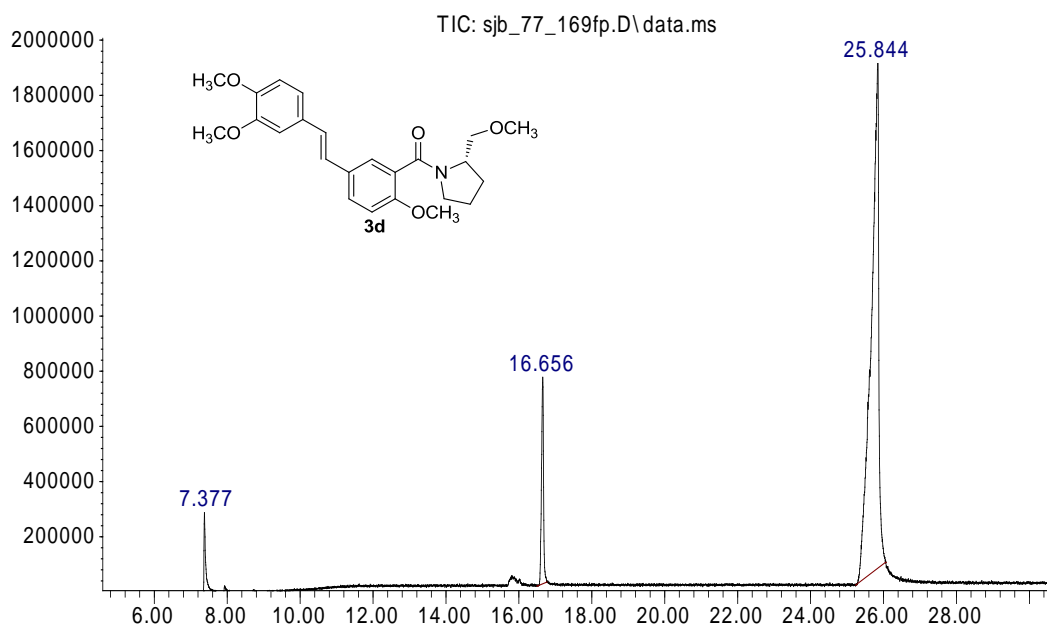

Time-->

Abundance

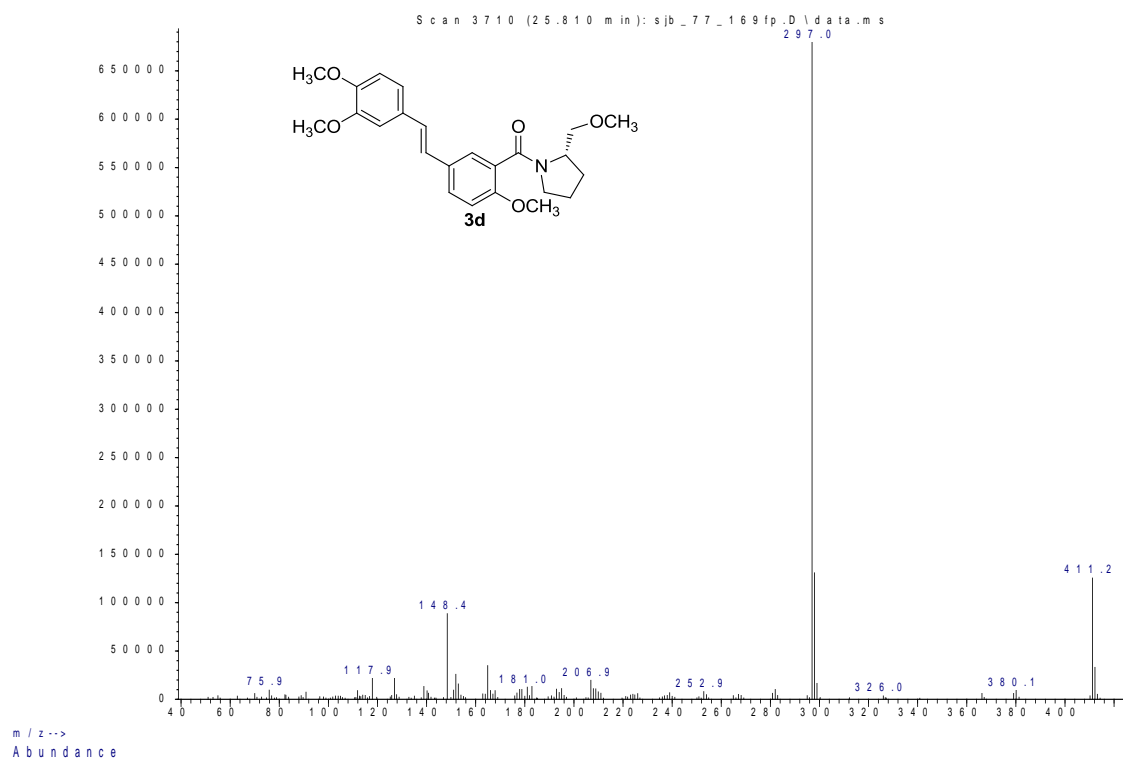

Abundance

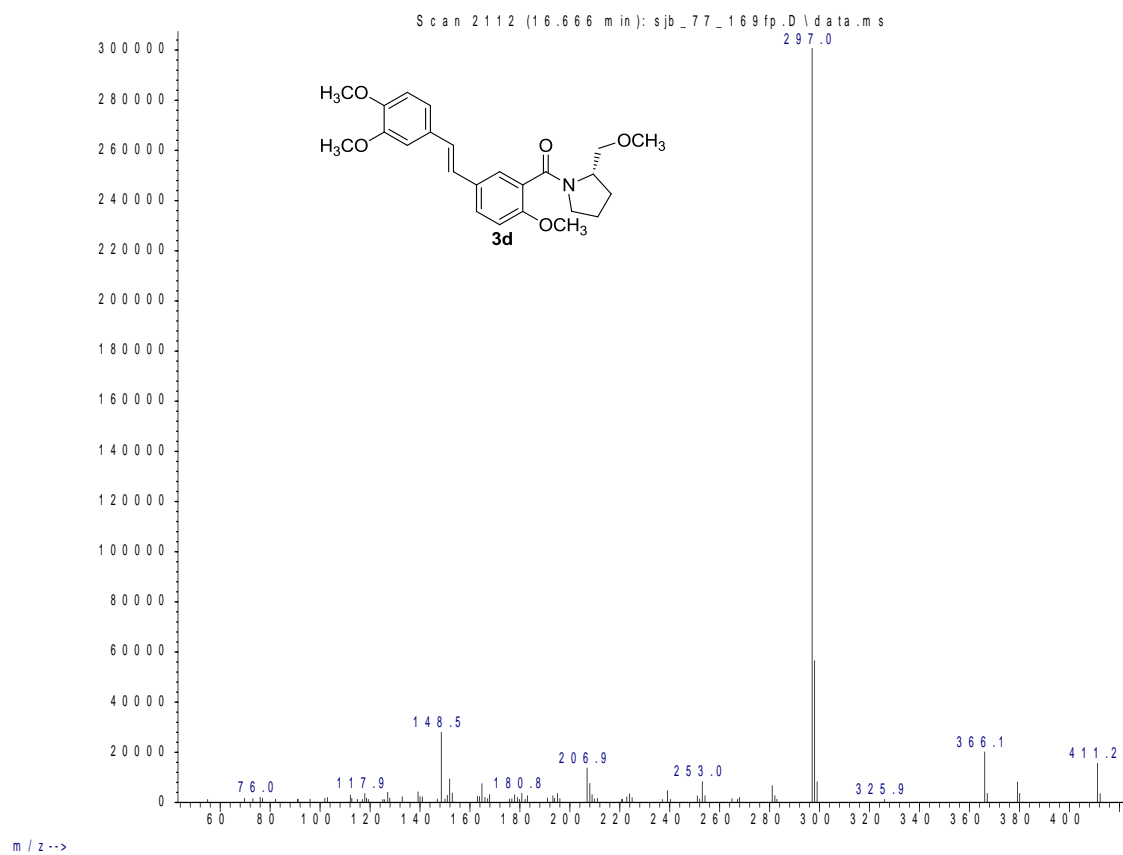

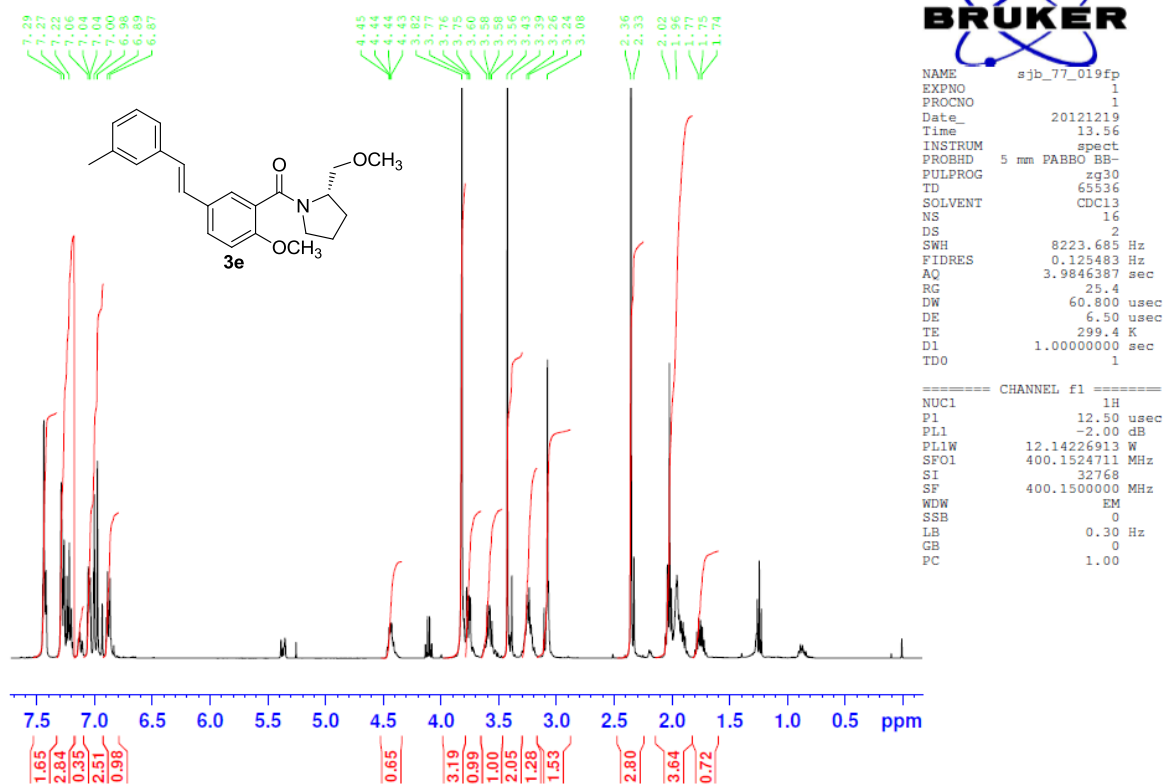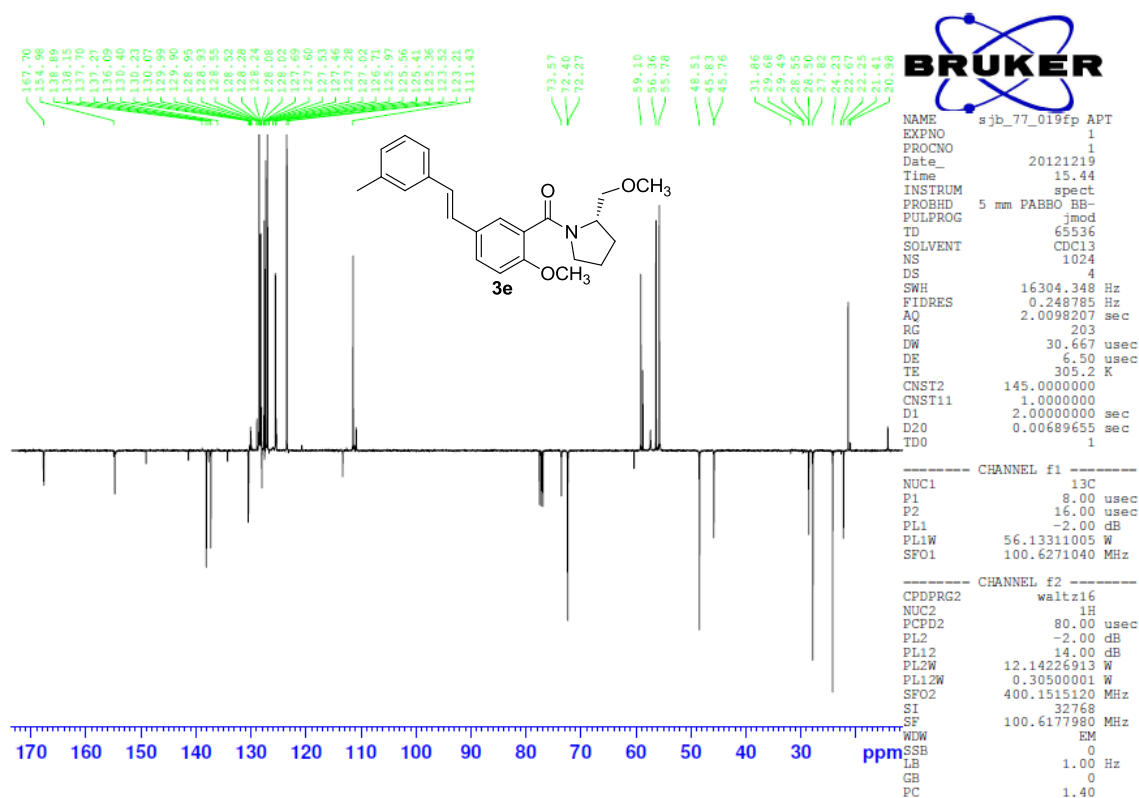

# Area Percent Report

Data Path : C:\msdchem\1\DATA\  
Data File : sjb\_77\_019fp.D  
Acq On : 19 Dec 2012 16:13  
Operator : sjb  
Sample : sjb\_77\_019fp  
Misc :  
ALS Vial : 5 Sample Multiplier: 1

Integration Parameters: autoint1.e  
Integrator: ChemStation

Method : C:\msdchem\1\5973N\PRECISION.M  
Title :

Signal : TIC: sjb\_77\_019fp.D\data.ms

| peak<br># | R.T.<br>min | first<br>scan | max<br>scan | last<br>scan | PK<br>TY | peak<br>height | corr.<br>area | corr.<br>% max. | % of<br>total |
|-----------|-------------|---------------|-------------|--------------|----------|----------------|---------------|-----------------|---------------|
| 1         | 12.894      | 1430          | 1453        | 1474         | PV       | 1521351        | 34495405      | 6.14%           | 5.785%        |
| 2         | 16.835      | 2080          | 2142        | 2189         | BV 2     | 6749209        | 561756588     | 100.00%         | 94.215%       |

Abundance

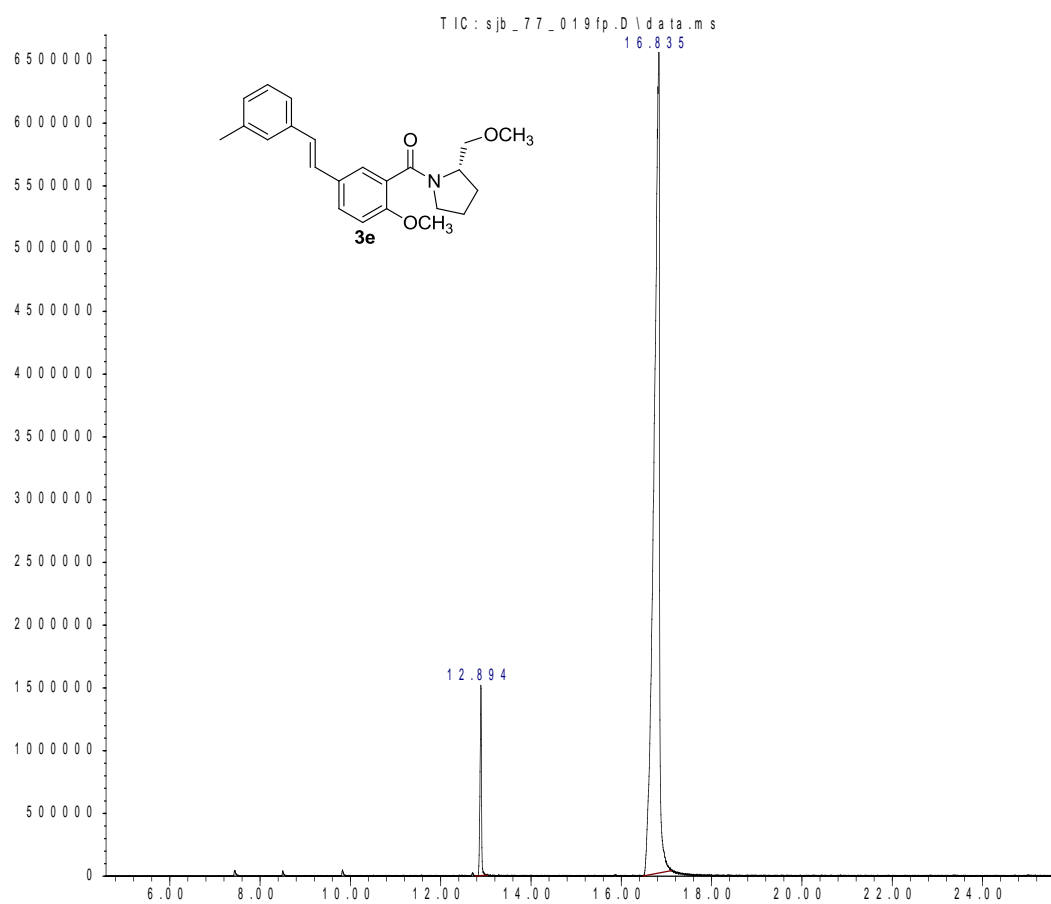

Time -->

Abundance

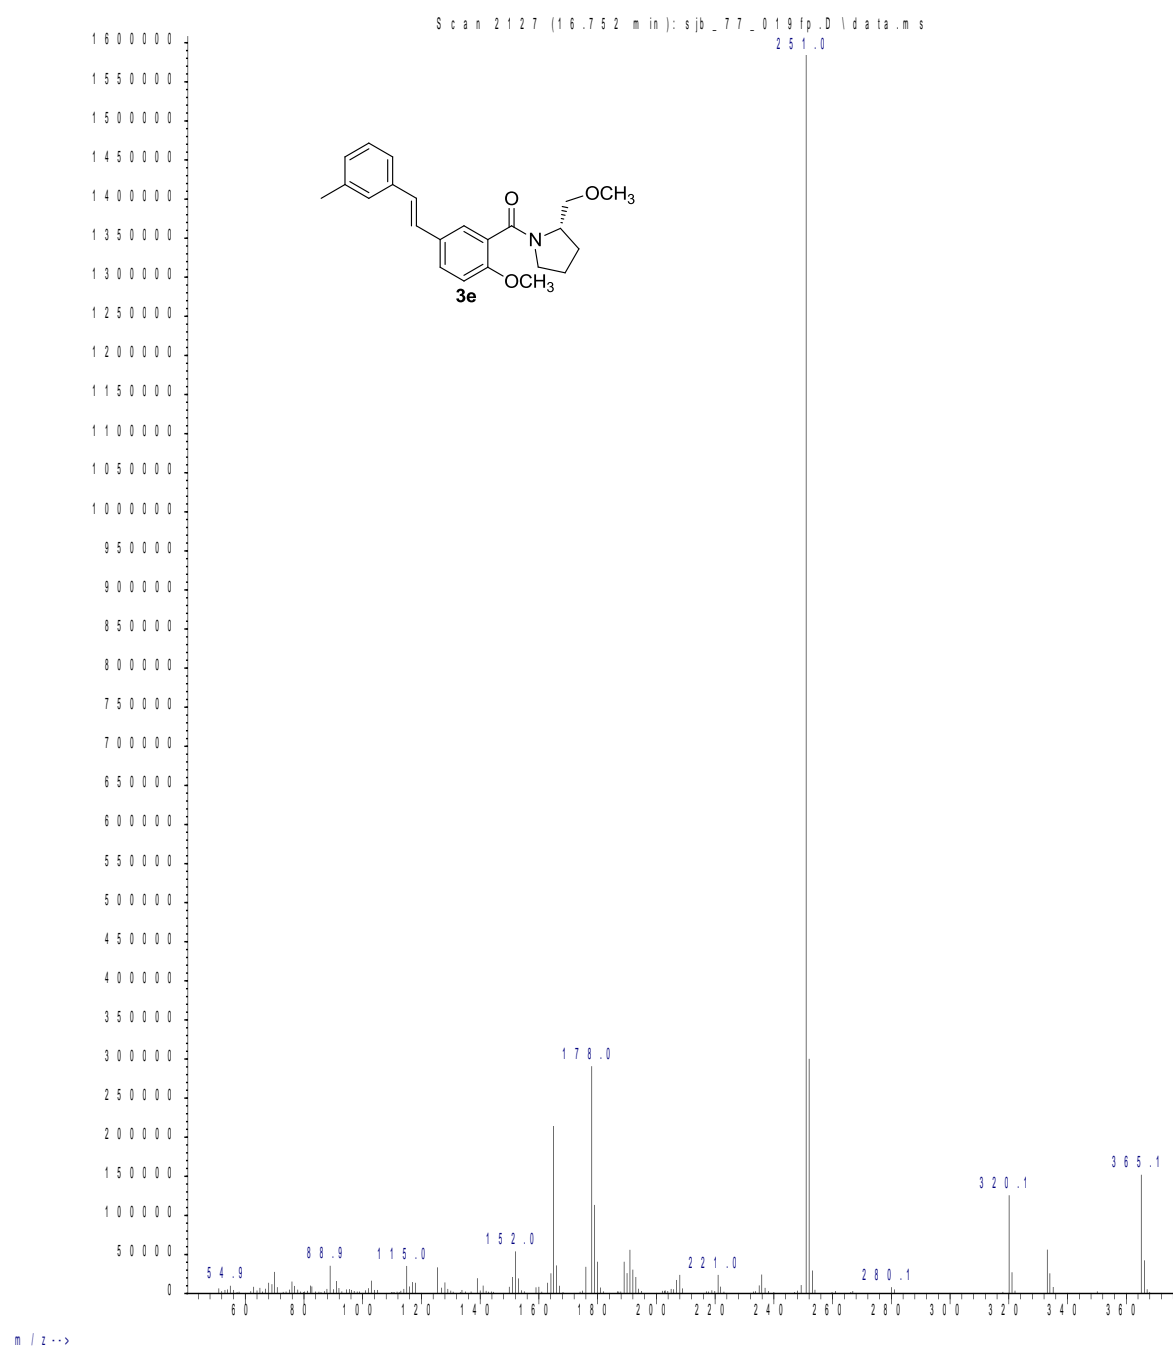

Abundance

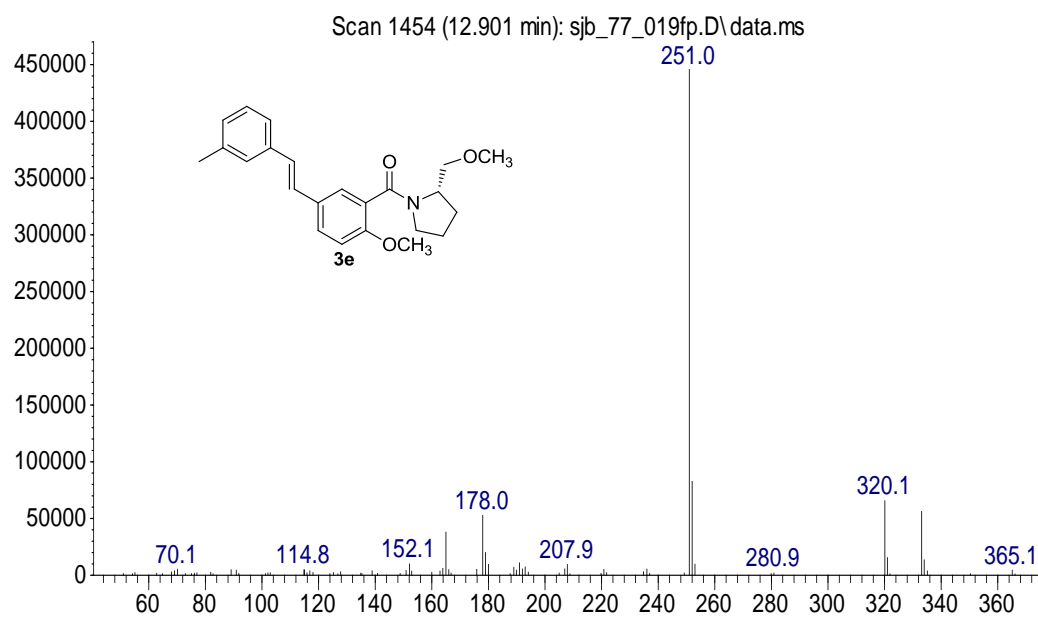

m/z-->

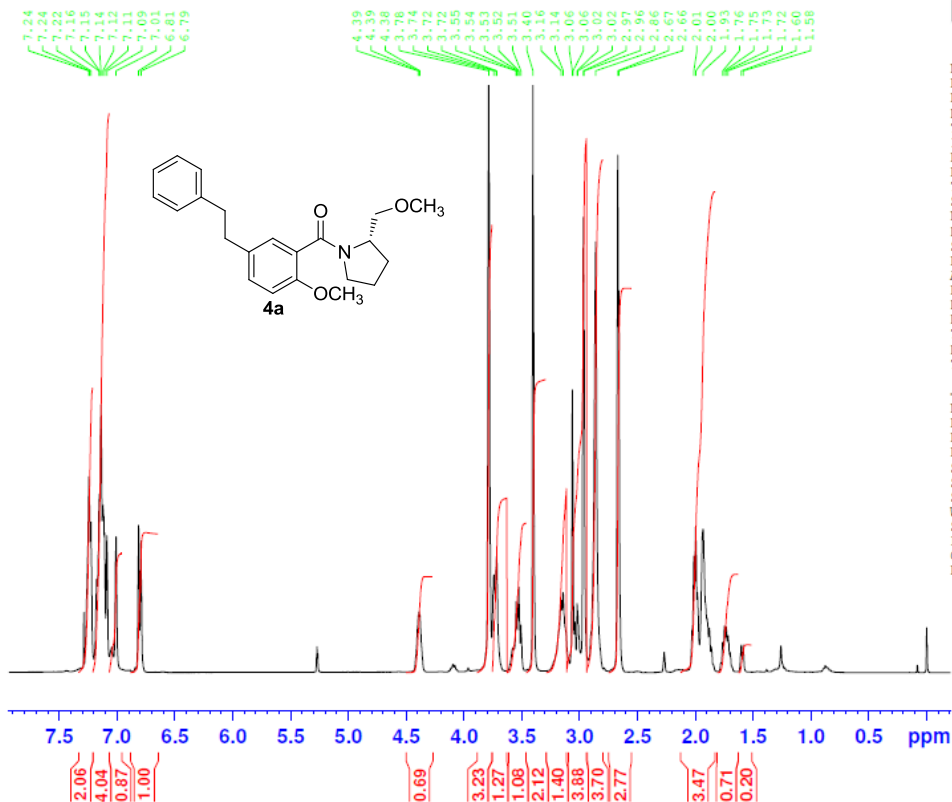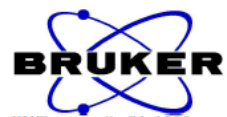

NAME sjb\_74\_199fp proton  
 EXPNO 1  
 PROCNO 1  
 Date\_ 20121109  
 Time 9.45  
 INSTRUM spect  
 PROBHD 5 mm PABBO BB-  
 PULPROG zg30  
 TD 65536  
 SOLVENT CDCl<sub>3</sub>  
 NS 16  
 DS 2  
 SWH 8223.685 Hz  
 FIDRES 0.125483 Hz  
 AQ 3.9846387 sec  
 RG 28.5  
 DW 60.800 usec  
 DE 6.50 usec  
 TE 301.2 K  
 D1 1.00000000 sec  
 TD0 1

----- CHANNEL f1 -----  
 NUC1 1H  
 P1 12.50 usec  
 PL1 -2.00 dB  
 PL1W 12.14226913 W  
 SFO1 400.1524711 MHz  
 SI 32768  
 SF 400.1499967 MHz  
 WDW EM  
 SSB 0  
 LB 0.30 Hz  
 GB  
 PC 1.00

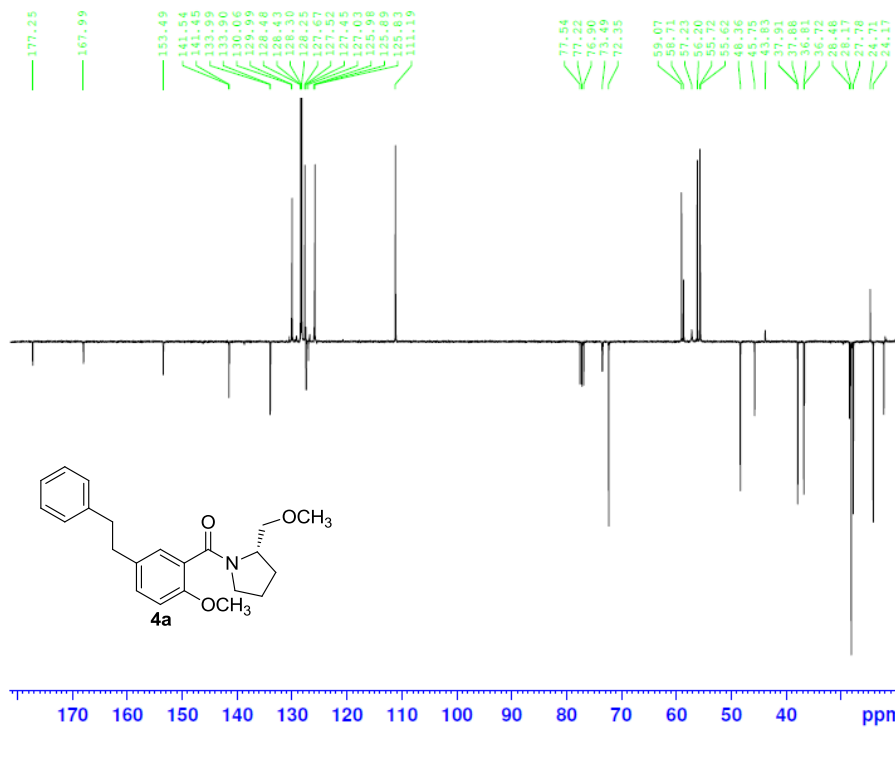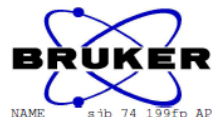

NAME sjb\_74\_199fp APT  
 EXPNO 1  
 PROCNO 1  
 Date\_ 20121112  
 Time 9.26  
 INSTRUM spect  
 PROBHD 5 mm PABBO BB-  
 PULPROG jmod  
 TD 65536  
 SOLVENT CDCl<sub>3</sub>  
 NS 1024  
 DS 4  
 SWH 16339.869 Hz  
 FIDRES 0.249327 Hz  
 AQ 2.0054517 sec  
 RG 203  
 DW 30.600 usec  
 DE 6.50 usec  
 TE 301.2 K  
 CNST2 145.0000000  
 CNST11 1.0000000  
 D1 2.00000000 sec  
 D20 0.00689655 sec  
 TD0 1

----- CHANNEL f1 -----  
 NUC1 13C  
 P1 8.00 usec  
 P2 16.00 usec  
 PL1 -2.00 dB  
 PL1W 56.13311005 W  
 SFO1 100.6278685 MHz

----- CHANNEL f2 -----  
 CPDPRG2 waltz16  
 NUC2 1H  
 PCPD2 80.00 usec  
 PL2 -2.00 dB  
 PL12 14.00 dB  
 PL2W 12.14226913 W  
 PL12W 0.30500001 W  
 SFO2 400.1514948 MHz  
 SI 32768  
 SF 100.6177980 MHz  
 WDW EM  
 SSB 0  
 LB 1.00 Hz  
 GB 0  
 PC 1.40

# Area Percent Report

Data Path : C:\msdchem\1\DATA\  
Data File : sjb\_74\_199fp.D  
Acq On : 9 Nov 2012 13:56  
Operator : sjb  
Sample : sjb\_74\_199fp  
Misc :  
ALS Vial : 15 Sample Multiplier: 1

Integration Parameters: autoint1.e  
Integrator: ChemStation

Method : C:\msdchem\1\METHODS\JMB2.m  
Title :

Signal : TIC: sjb\_74\_199fp.D\data.ms

| peak<br># | R.T.<br>min | first<br>scan | max<br>scan | last<br>scan | PK<br>TY | peak<br>height | corr.<br>area | corr.<br>% max. | % of<br>total |
|-----------|-------------|---------------|-------------|--------------|----------|----------------|---------------|-----------------|---------------|
| 1         | 10.007      | 946           | 948         | 956          | VV 3     | 41194          | 970477        | 0.26%           | 0.246%        |
| 2         | 11.983      | 1281          | 1294        | 1302         | BV       | 1081831        | 18401106      | 4.91%           | 4.665%        |
| 3         | 12.569      | 1367          | 1396        | 1431         | PV       | 12857242       | 375088829     | 100.00%         | 95.089%       |

Sum of corrected areas: 394460412

JMB2.m Mon Nov 12 09:44:14 2012

Abundance

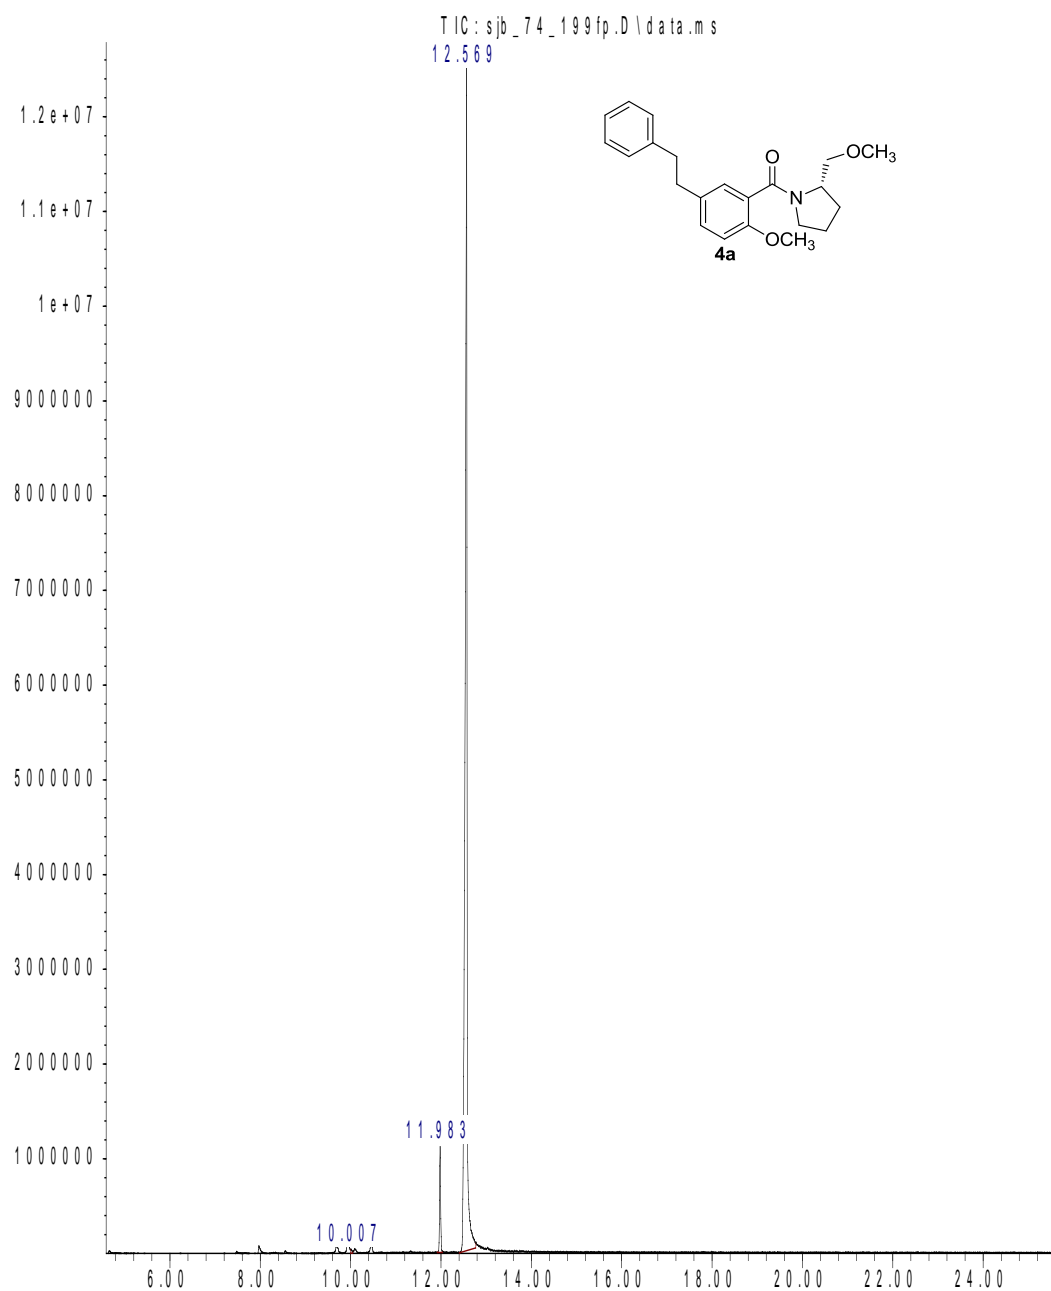

Abundance

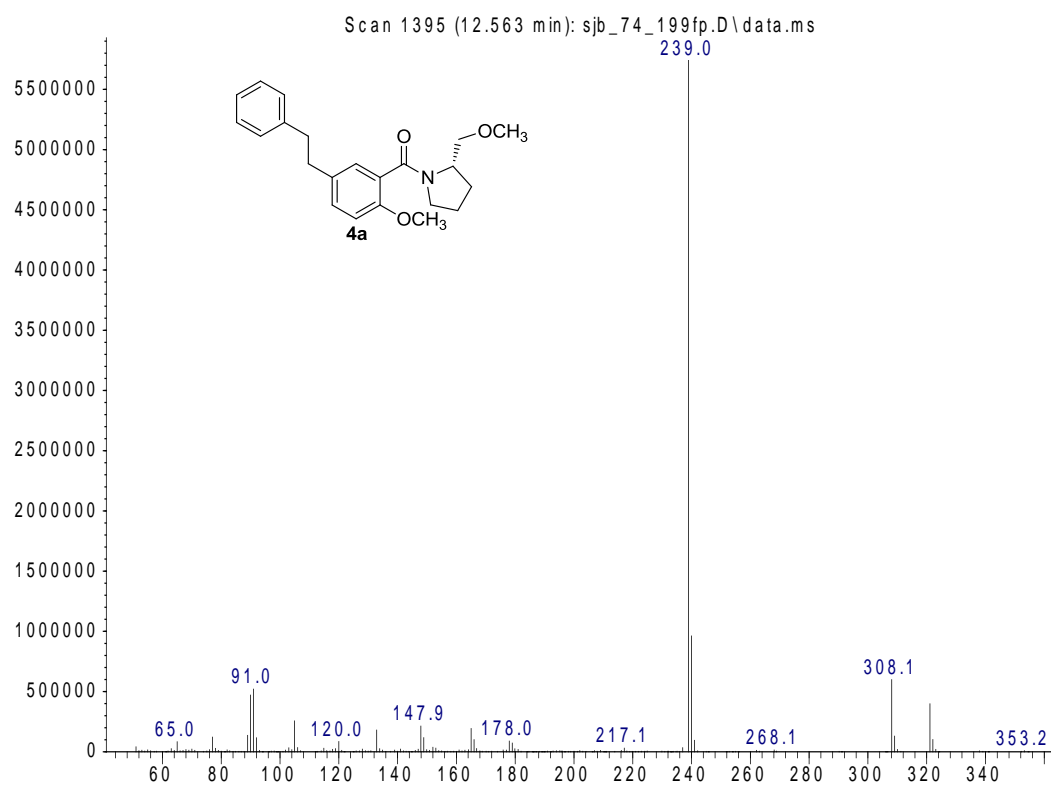

m/z-->

Abundance

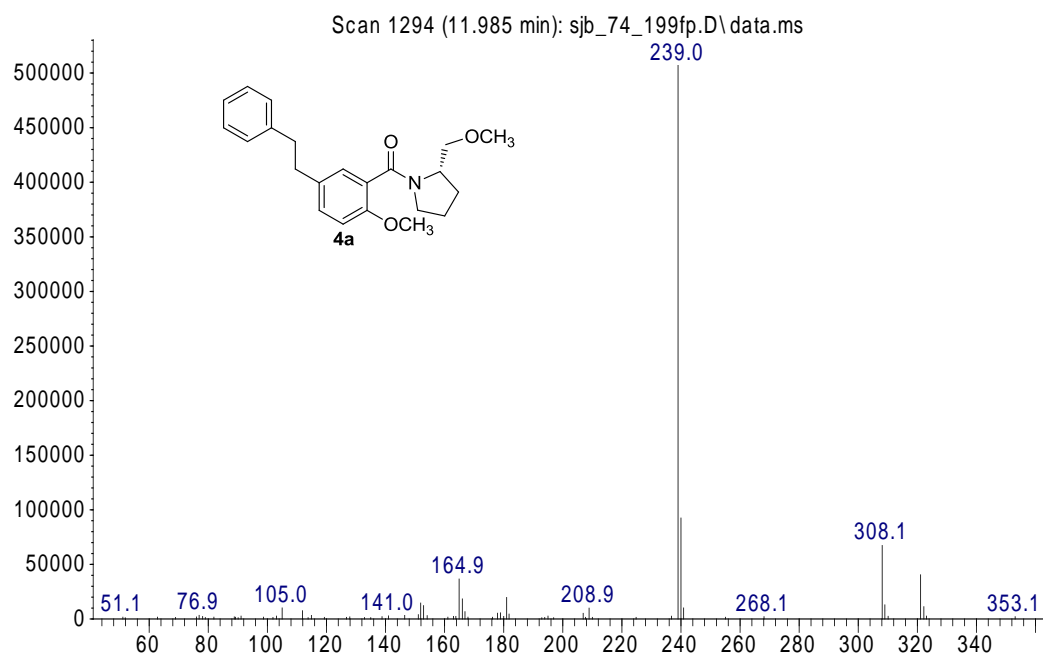

m/z-->

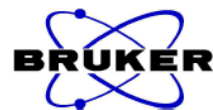

|         |                    |            |          |
|---------|--------------------|------------|----------|
| NAME    | sjb_77_154ip take2 |            |          |
| EXPNO   |                    |            | 1        |
| PROCNO  |                    |            | 1        |
| Date_   |                    |            | 20130725 |
| Time_   |                    |            | 7.53     |
| INSTRUM |                    | spect      |          |
| PROBHD  | 5 mm               | PABBO BB-  |          |
| PULPROG |                    | zg30       |          |
| TD      |                    | 65536      |          |
| SOLVENT |                    | CDCl3      |          |
| NS      |                    | 16         |          |
| DS      |                    |            |          |
| SWH     |                    | 8223.685   | Hz       |
| FIDRES  |                    | 0.125483   | Hz       |
| AQ      |                    | 3.9846387  | sec      |
| RG      |                    | 45.2       |          |
| DW      |                    | 60.800     | usec     |
| DE      |                    | 6.50       | usec     |
| TE      |                    | 301.2      | K        |
| D1      |                    | 1.00000000 | sec      |
| TD0     |                    | 1          |          |

```

CHANNEL f1
-----
NUC1          1H
P1            12.50 usec
PL1           -2.00 dB
PLIW          12.14226913 W
SFO1          400.1524711 MHz
SI            32768
SF            400.1500000 MHz
WDW           EM
SSB           0
LB            0.30 Hz
GB            0
PC            1.00

```

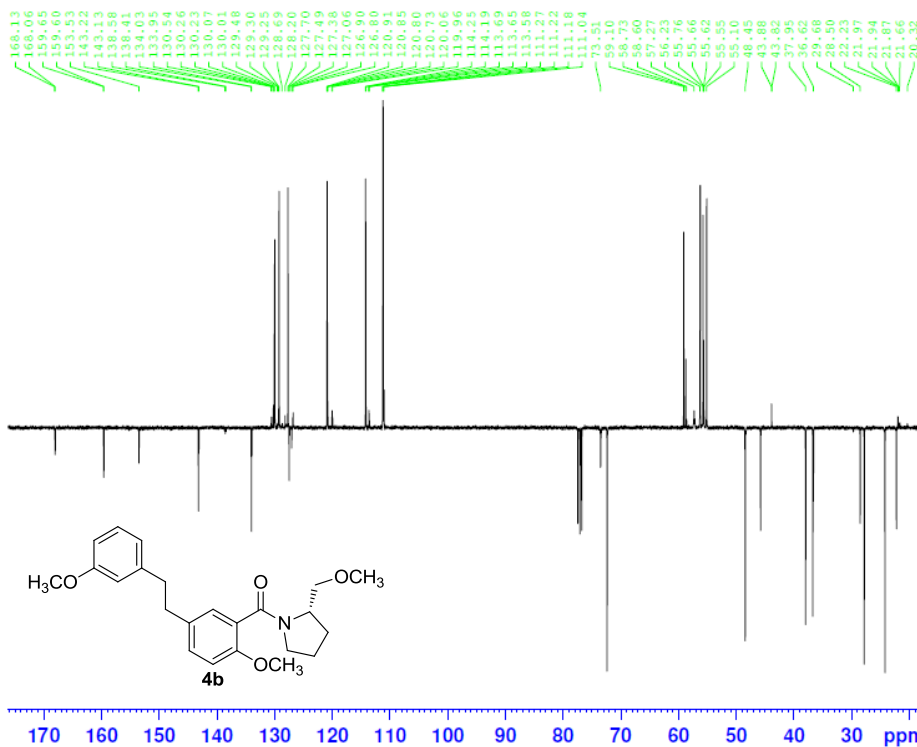

```

Current Data Parameters
NAME      s_jb_77_154df  APT
EXPNO     1
PROCNO    1

F2 - Acquisition Parameters
Date_     20130725
Time      8.56
INSTRUM    spect
PROBHD     5 mm PABBO BB-
PULPROG    smod
TD         65536
SOLVENT     CDC13
NS         1024
DS         4
SWH         24038.461  Hz
FIDRES     0.366798  Hz
AQ         1.3631488  sec
RG         203
RG         20 20.800  usec
DE         6.50      usec
TE         301.2     K
CNST2     145.0000000
CNST11    1.0000000
D0         0.0000000  sec
D20        2.0069655  sec
TD0        1

```

```

===== CHANNEL f1 =====
NUC1                13C
P1                   8.00 usec
P2                  16.00 usec
PL1                 -2.00 dB
PL1W                56.13311005 W
SFO1                100.6278593 MHz

```

```
===== CHANNEL f2 =====
CPDPRG[2      waltz16
NUC2          1H
PCPD2          80.00 usec
PL2           -2.00 dB
PL12          14.00 dB
PL2W          12.14226913 W
PL12W         0.30500001 W
SFO2          400.1515703 MHz
```

```

F2 - Processing parameters
SI                      32768
SF                      100.6177980 MHz
WDW                      EM
SSB                      0
LB                      1.00 Hz
GB                      0
PC                      1.40

```

# Area Percent Report

Data Path : C:\msdchem\1\DATA\  
 Data File : sjb\_74\_029fp.D  
 Acq On : 15 Jun 2012 8:44  
 Operator : sjb  
 Sample : sjb\_74\_029fp  
 Misc :  
 ALS Vial : 30 Sample Multiplier: 1

Integration Parameters: autoint1.e  
 Integrator: ChemStation

Method : C:\msdchem\1\METHODS\JMB2.m  
 Title :

Signal : TIC: sjb\_74\_029fp.D\data.ms

| peak<br># | R.T.<br>min | first<br>scan | max<br>scan | last<br>scan | PK<br>TY | peak<br>height | corr.<br>area | corr.<br>% max. | % of<br>total |
|-----------|-------------|---------------|-------------|--------------|----------|----------------|---------------|-----------------|---------------|
| 1         | 7.427       | 491           | 497         | 525          | BV       | 840988         | 12778818      | 0.54%           | 0.519%        |
| 2         | 7.944       | 582           | 588         | 603          | BV       | 558514         | 8620398       | 0.37%           | 0.350%        |
| 3         | 8.504       | 680           | 686         | 707          | PV       | 130178         | 2996109       | 0.13%           | 0.122%        |
| 4         | 13.731      | 1566          | 1599        | 1622         | PV       | 2596360        | 88351274      | 3.77%           | 3.589%        |
| 5         | 13.881      | 1622          | 1625        | 1634         | VV 5     | 37747          | 1023498       | 0.04%           | 0.042%        |
| 6         | 14.105      | 1652          | 1664        | 1683         | VV 4     | 67239          | 1888313       | 0.08%           | 0.077%        |
| 7         | 14.782      | 1719          | 1783        | 1849         | PV 2     | 31773351       | 2345930512    | 100.00%         | 95.301%       |

Sum of corrected areas: 2461588922

JMB2.m Mon Nov 12 09:52:24 2012

Abundance

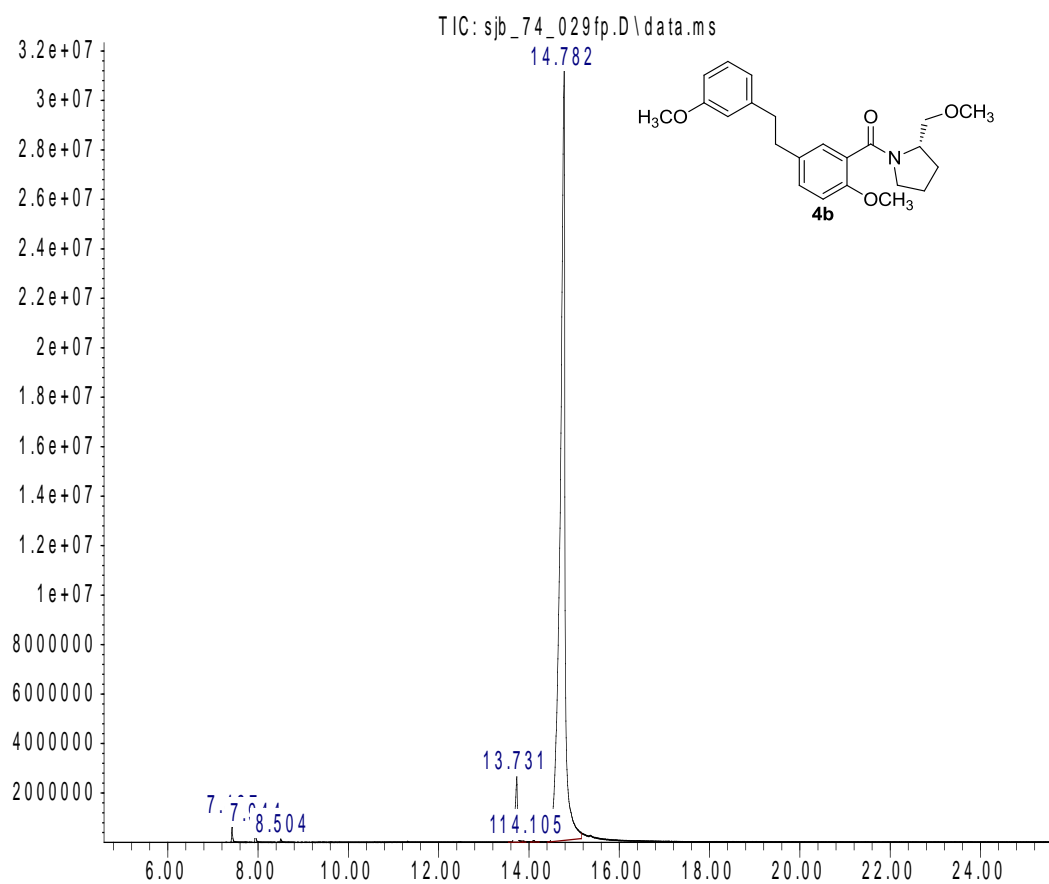

Time-->

Abundance

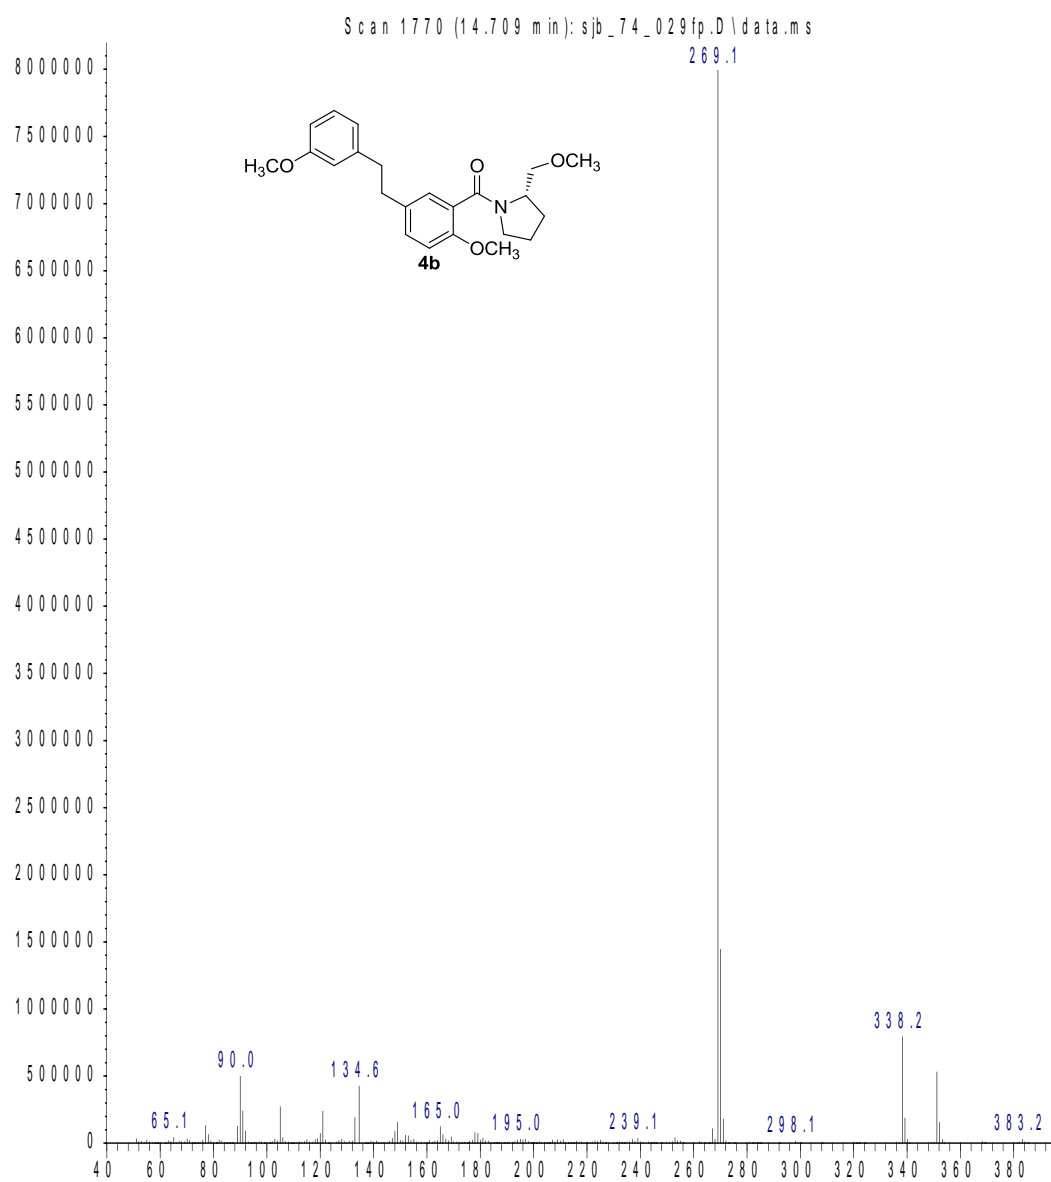

m/z-->

Abundance

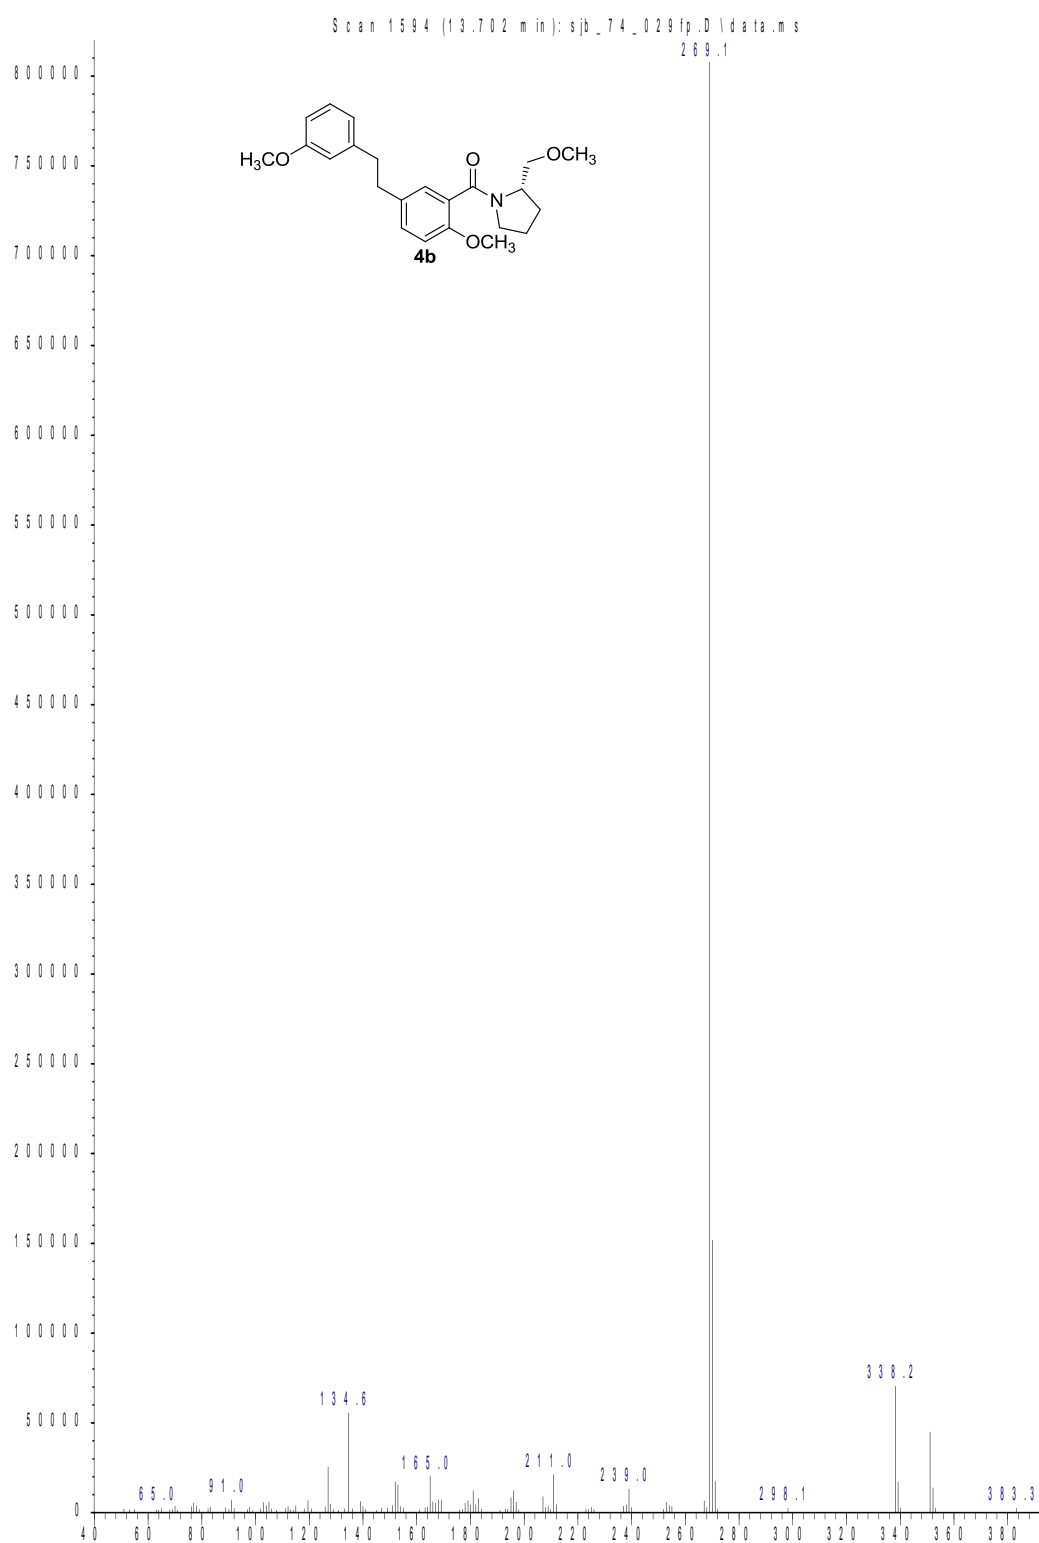

m / z >>

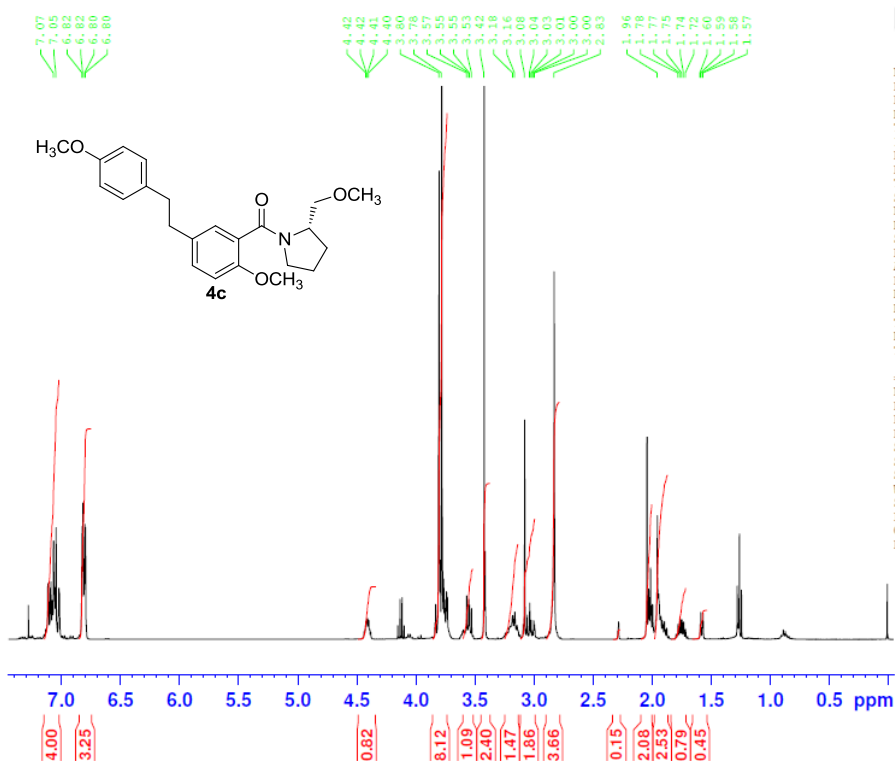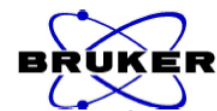

NAME ra\_67\_149pure  
EXPNO 1  
PROCNO 1  
Date\_ 20120718  
Time 11.52  
INSTRUM spect  
PROBHD 5 mm PABBO BB-  
PULPROG zg30  
TD 65536  
SOLVENT CDC13  
NS 16  
DS 2  
SWH 8223.685 Hz  
FIDRES 0.125483 Hz  
AQ 3.9846387 sec  
RG 40.3  
DW 60.800 usec  
DE 6.50 usec  
TE 301.2 K  
D1 1.00000000 sec  
TD0 1

===== CHANNEL f1 =====  
NUC1 1H  
P1 12.50 usec  
PL1 -2.00 dB  
PL1W 12.14226913 W  
SFO1 400.1524711 MHz  
SI 32768  
SF 400.1500000 MHz  
WDW EM  
SSB 0  
LB 0.30 Hz  
GB 0  
PC 1.00

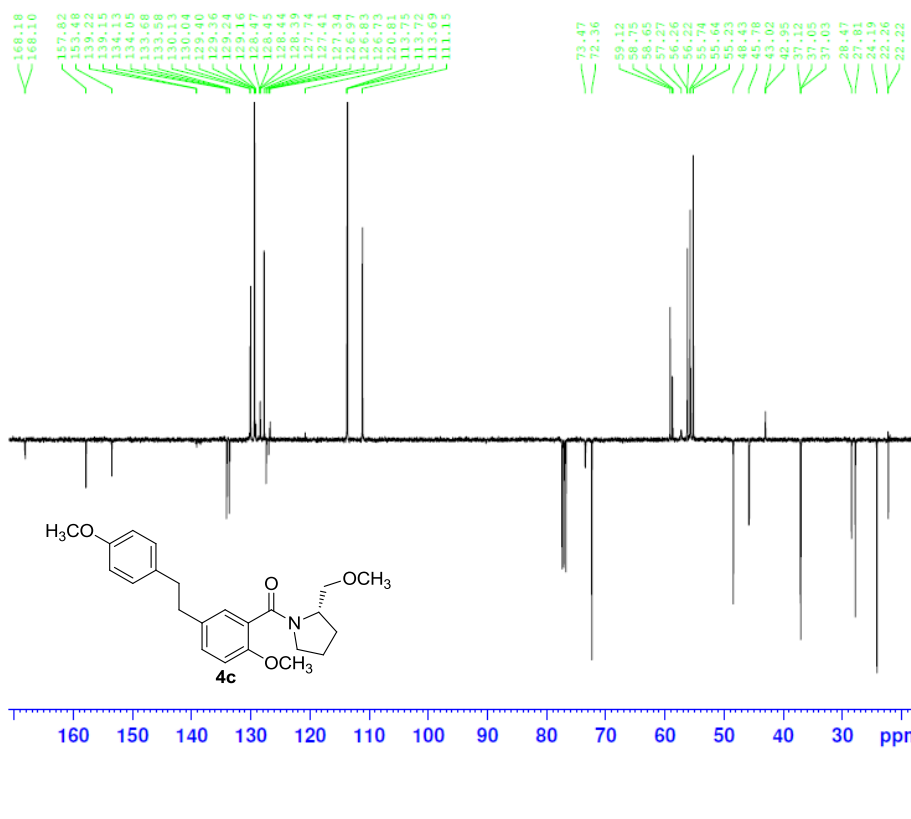

Current Data Parameters  
NAME sjb\_77\_217 APT2  
EXPNO 1  
PROCNO 1  
F2 - Acquisition Parameters  
Date\_ 20131014  
Time 13.57  
INSTRUM spect  
PROBHD 5 mm PABBO BB-  
PULPROG jmod  
TD 65536  
SOLVENT CDC13  
NS 1024  
DS 4  
SWH 24038.461 Hz  
FIDRES 0.366798 Hz  
AQ 1.3631488 sec  
RG 203  
DW 20.800 usec  
DE 6.50 usec  
TE 298.2 K  
CNST2 145.0000000  
CNST11 1.0000000  
D1 2.00000000 sec  
D20 0.00689655 sec  
TD0 1

===== CHANNEL f1 =====  
NUC1 13C  
P1 8.00 usec  
P2 16.00 usec  
PL1 -2.00 dB  
PL1W 56.13311005 W  
SFO1 100.6278593 MHz

===== CHANNEL f2 =====  
CPDPRG2 waltz16  
NUC2 1H  
PCPD2 75.00 usec  
PL2 -2.00 dB  
PL12 13.39 dB  
PL2W 12.14226913 W  
PL12W 0.35099408 W  
SFO2 400.1515863 MHz

F2 - Processing parameters  
SI 32768  
SF 100.6177980 MHz  
WDW EM  
SSB 0  
LB 1.00 Hz  
GB 0  
PC 1.40

# Area Percent Report

Data Path : C:\msdchem\1\DATA\  
 Data File : sjb\_77\_217fp.D  
 Acq On : 17 Sep 2013 11:20  
 Operator : sjb  
 Sample : sjb\_77\_217fp  
 Misc :  
 ALS Vial : 95 Sample Multiplier: 1

Integration Parameters: atuneWPMMar14.e  
 Integrator: ChemStation

Method : C:\msdchem\1\METHODS\ckr3.m  
 Title :

Signal : TIC: sjb\_77\_217fp.D\data.ms

| peak<br># | R.T.<br>min | first<br>scan | max<br>scan | last<br>scan | PK<br>TY | peak<br>height | corr.<br>area | corr.<br>% max. | % of<br>total |
|-----------|-------------|---------------|-------------|--------------|----------|----------------|---------------|-----------------|---------------|
| 1         | 13.988      | 1631          | 1644        | 1656         | VV       | 419295         | 10837930      | 11.40%          | 10.200%       |
| 2         | 14.755      | 1750          | 1778        | 1815         | PV       | 2274434        | 95093596      | 100.00%         | 89.494%       |
| 3         | 14.972      | 1815          | 1816        | 1826         | VV 6     | 13174          | 325675        | 0.34%           | 0.306%        |

Sum of corrected areas: 106257201

ckr3.m Wed Mar 19 09:43:04 2014

Abundance

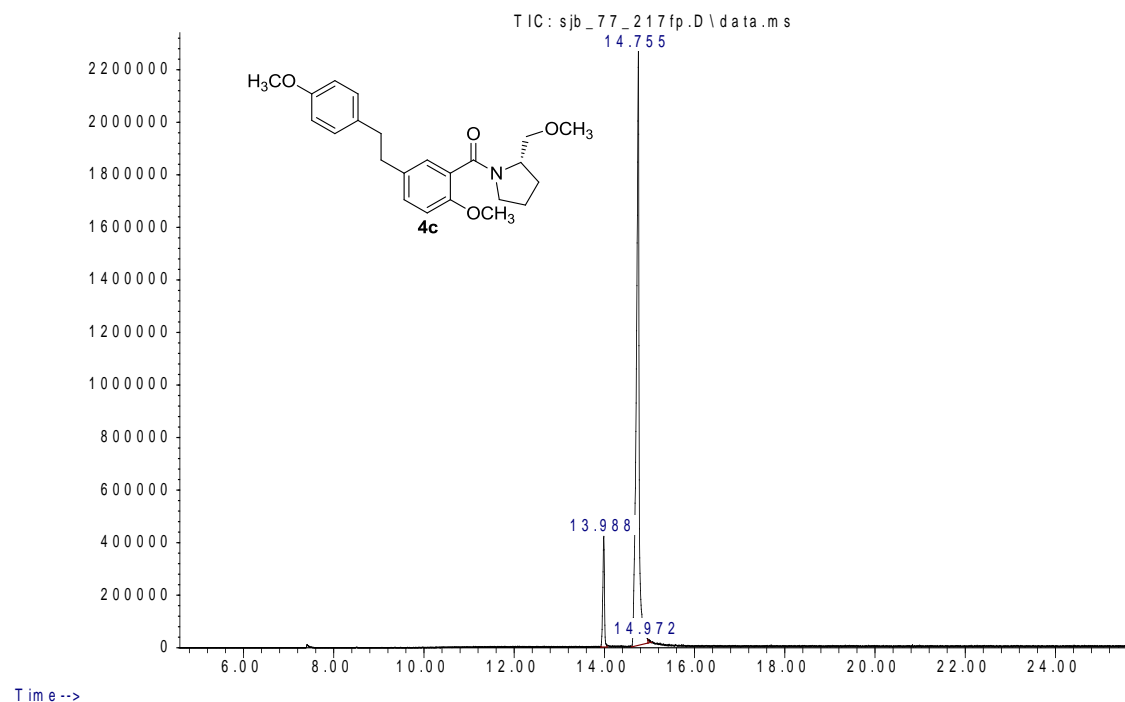

Abundance

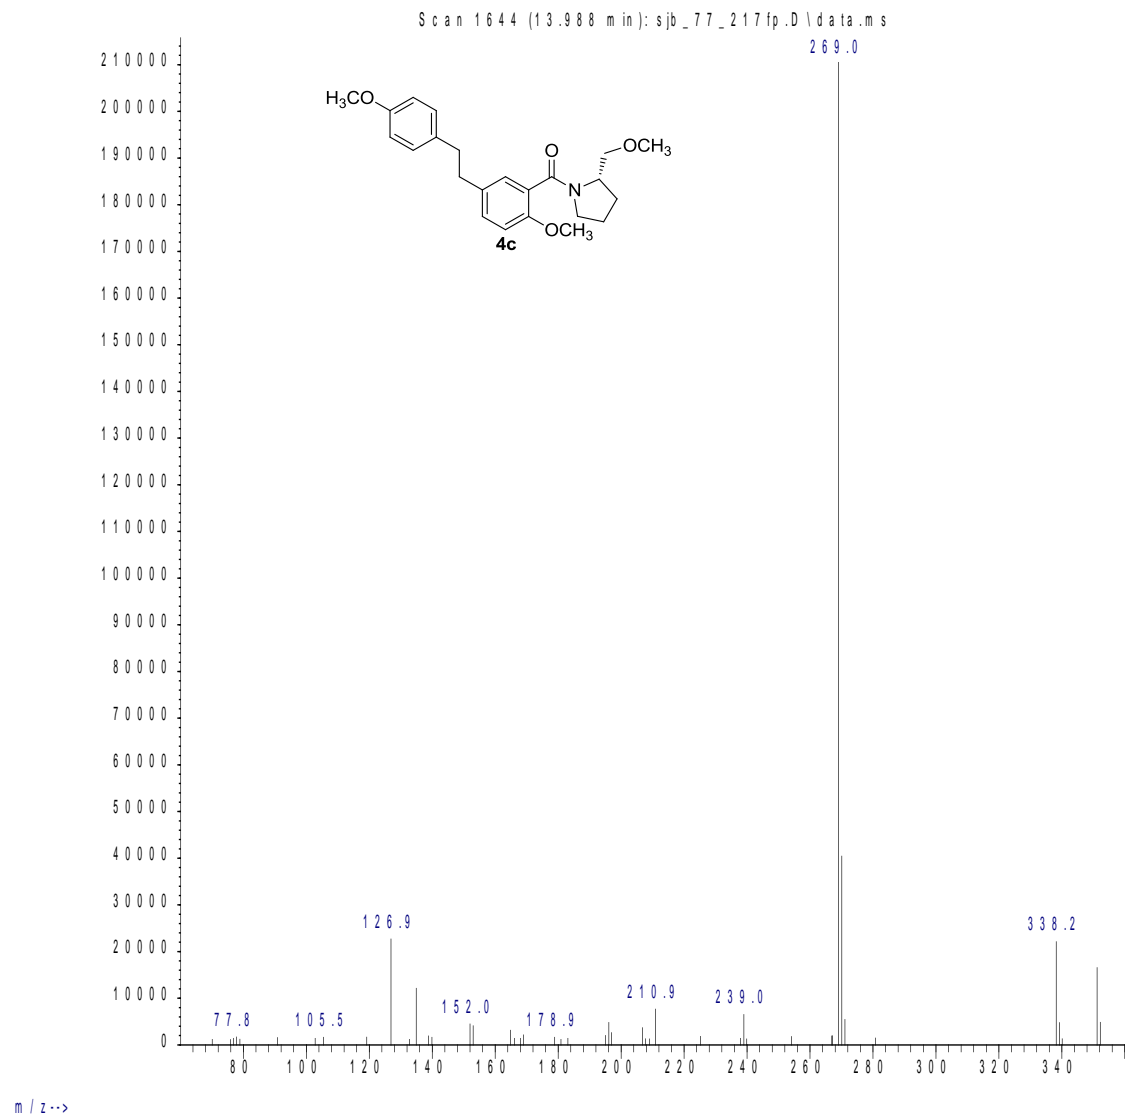

Abundance

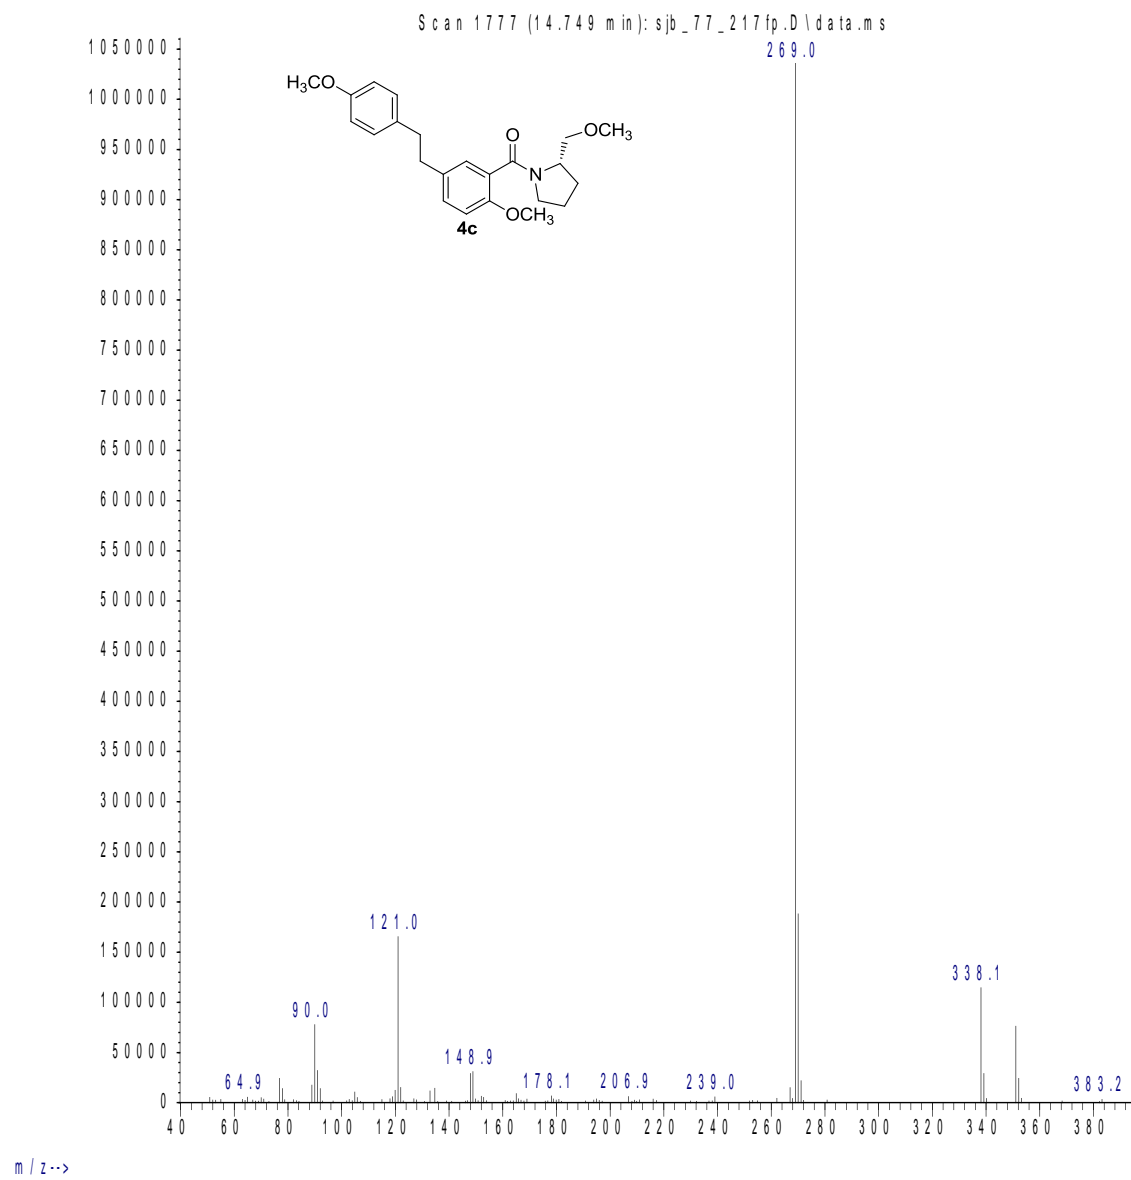

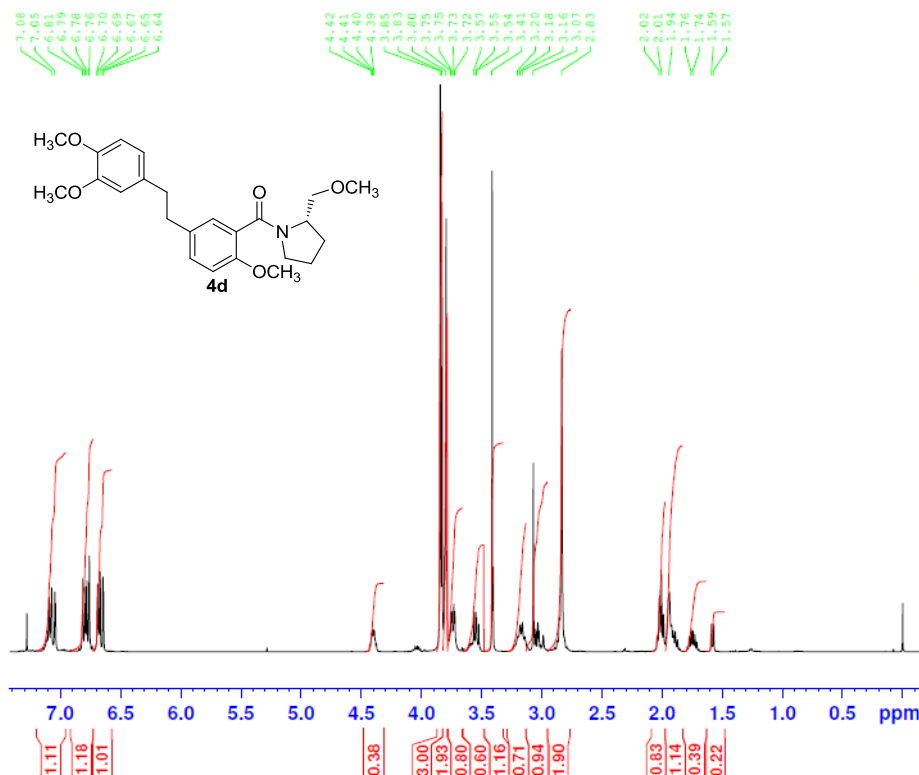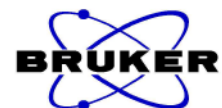

NAME sjb\_74\_211fp take 2  
 EXPNO 1  
 PROCNO 1  
 Date\_ 20130716  
 Time 8.57  
 INSTRUM spect  
 PROBHD 5 mm PABBO BB-  
 PULPROG zg30  
 TD 65536  
 SOLVENT CDC13  
 NS 16  
 DS 2  
 SWH 8223.685 Hz  
 FIDRES 0.125483 Hz  
 AQ 3.9846387 sec  
 RG 45.2  
 DW 60.800 usec  
 DE 6.50 usec  
 TE 301.2 K  
 D1 1.00000000 sec  
 TDO 1

----- CHANNEL f1 -----  
 NUC1 1H  
 P1 12.50 usec  
 PL1 -2.00 dB  
 PL1W 12.14226913 W  
 SFO1 400.1524711 MHz  
 SI 32768  
 SF 400.1500000 MHz  
 WDW EM  
 SSB 0  
 LB 0.30 Hz  
 GB 0  
 PC 1.00

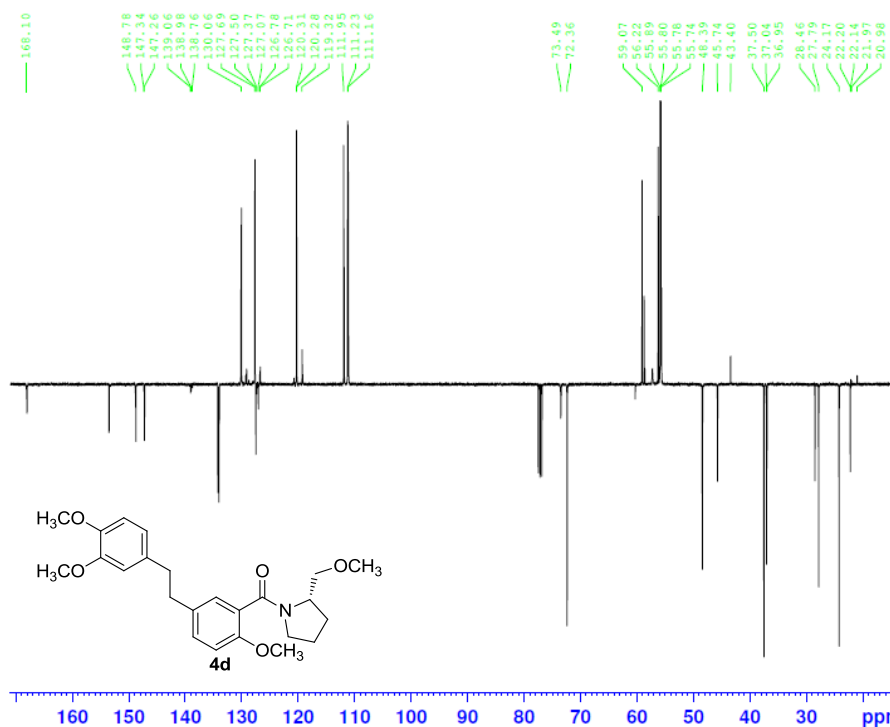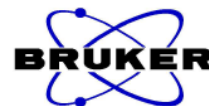

NAME sjb\_74\_211fp 13CAPT  
 EXPNO 1  
 PROCNO 1  
 Date\_ 20121127  
 Time 9.51  
 INSTRUM spect  
 PROBHD 5 mm PABBO BB-  
 PULPROG jmod  
 TD 65536  
 SOLVENT CDC13  
 NS 1024  
 DS 4  
 SWH 18750.000 Hz  
 FIDRES 0.286102 Hz  
 AQ 1.7476766 sec  
 RG 203  
 DW 26.667 usec  
 DE 6.50 usec  
 TE 301.2 K  
 CNST2 145.0000000  
 CNST11 1.0000000  
 D1 2.00000000 sec  
 D20 0.00689655 sec  
 TDO 1

----- CHANNEL f1 -----  
 NUC1 13C  
 P1 8.00 usec  
 P2 16.00 usec  
 PL1 -2.00 dB  
 PL1W 56.13311005 W  
 SFO1 100.6268218 MHz

----- CHANNEL f2 -----  
 CPDPRG2 waltz16  
 NUC2 1H  
 PCPD2 80.00 usec  
 PL2 -2.00 dB  
 PL12 14.00 dB  
 PL2W 12.14226913 W  
 PL12W 0.30500001 W  
 SFO2 400.1514721 MHz  
 SI 32768  
 SF 100.6177980 MHz  
 WDW EM  
 SSB 0  
 LB 1.00 Hz  
 GB 0  
 PC 1.40

# Area Percent Report

Data Path : C:\msdchem\1\DATA\  
 Data File : sjb\_77\_171fp.D  
 Acq On : 7 Aug 2013 16:17  
 Operator : sjb  
 Sample : sjb\_77\_171fp  
 Misc :  
 ALS Vial : 100 Sample Multiplier: 1

Integration Parameters: autoint1.e  
 Integrator: ChemStation

Method : C:\msdchem\1\5973N\PRECISION.M  
 Title :

Signal : TIC: sjb\_77\_171fp.D\data.ms

| peak<br># | R.T.<br>min | first<br>scan | max<br>scan | last<br>scan | PK<br>TY | peak<br>height | corr.<br>area | corr.<br>% max. | % of<br>total |
|-----------|-------------|---------------|-------------|--------------|----------|----------------|---------------|-----------------|---------------|
| 1         | 7.369       | 481           | 487         | 521          | BV       | 1282670        | 30810488      | 2.37%           | 2.176%        |
| 2         | 7.910       | 575           | 582         | 600          | BV       | 67415          | 1896048       | 0.15%           | 0.134%        |
| 3         | 15.589      | 1897          | 1924        | 1947         | PV       | 1927063        | 82443691      | 6.35%           | 5.824%        |
| 4         | 15.730      | 1947          | 1949        | 1953         | VV 5     | 27904          | 466958        | 0.04%           | 0.033%        |
| 5         | 16.860      | 2078          | 2146        | 2256         | PV       | 15294204       | 1299084977    | 100.00%         | 91.764%       |
| 6         | 17.501      | 2256          | 2258        | 2260         | VV 3     | 27053          | 299743        | 0.02%           | 0.021%        |
| 7         | 17.520      | 2260          | 2261        | 2272         | VV 7     | 26207          | 589949        | 0.05%           | 0.042%        |
| 8         | 17.593      | 2272          | 2274        | 2278         | VV 5     | 10384          | 82492         | 0.01%           | 0.006%        |

Sum of corrected areas: 1415674346

Abundance

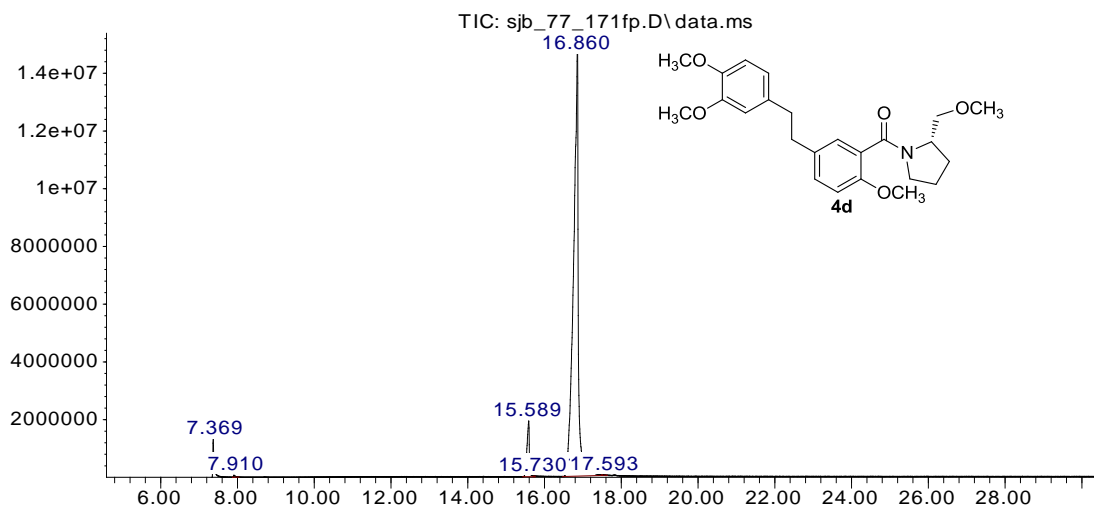

Time-->

Abundance

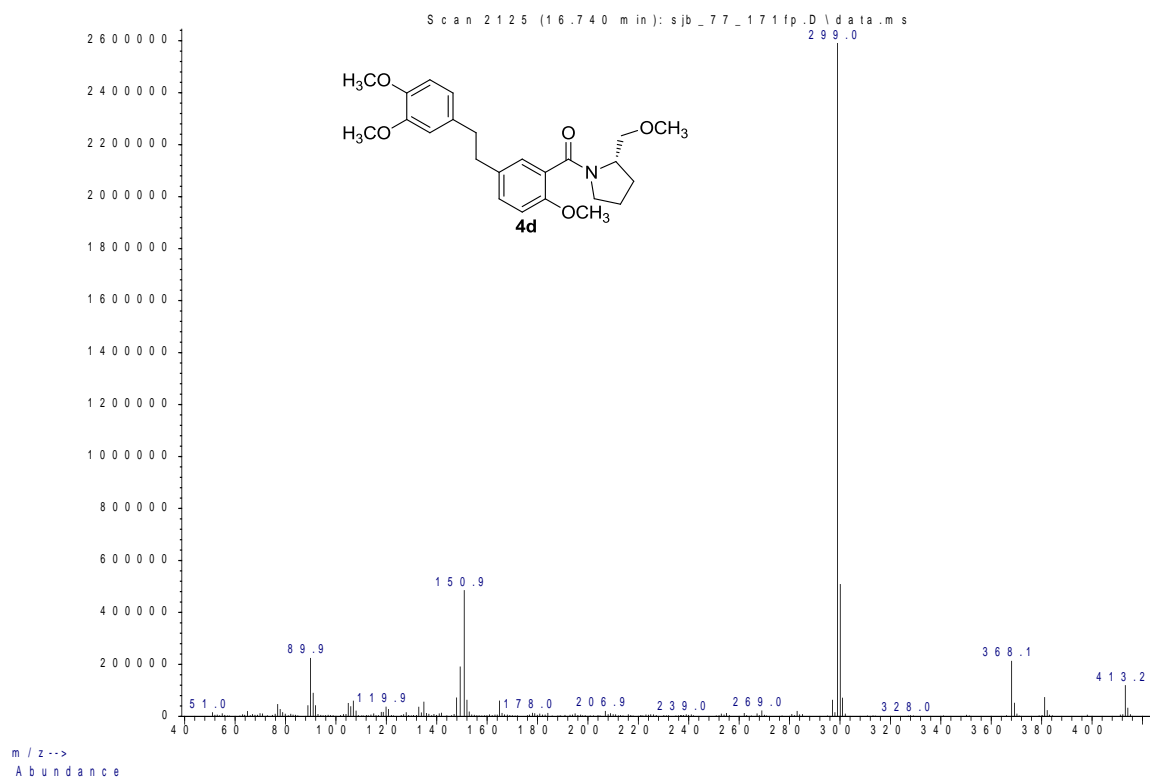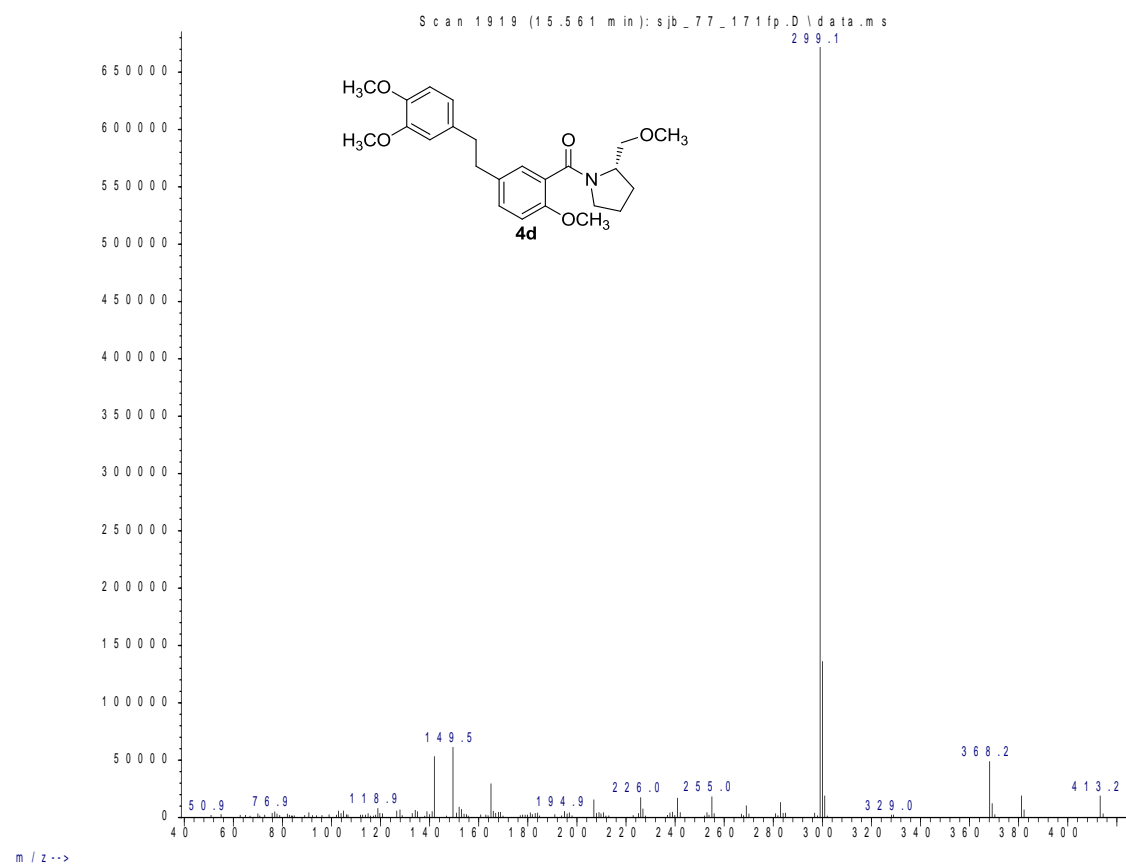

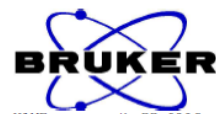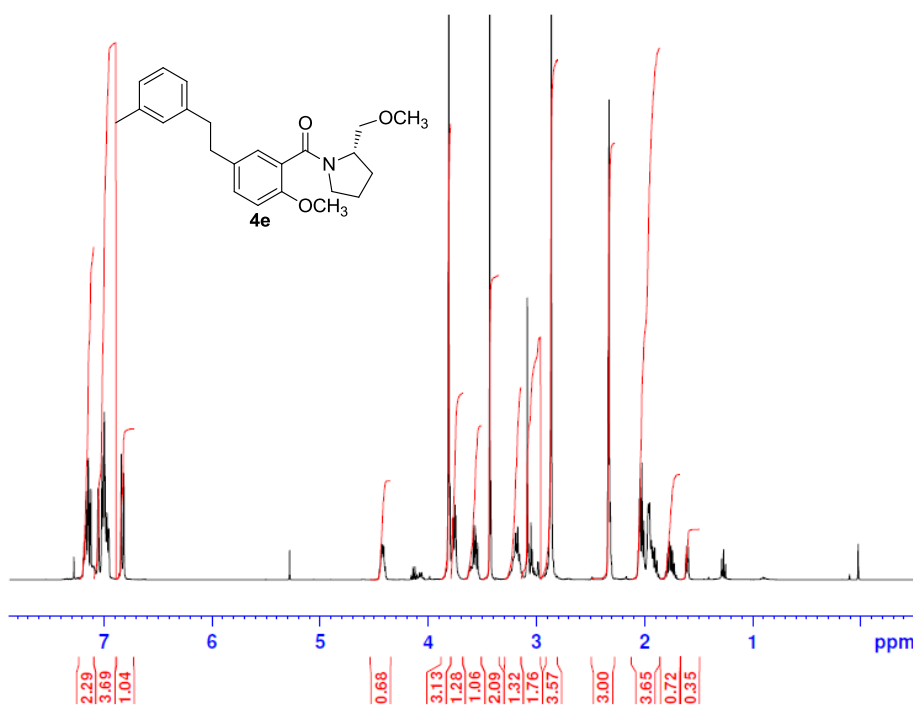

NAME sjb\_77\_020fp  
EXPNO 1  
PROCNO 1  
Date\_ 20121221  
Time 11.07  
INSTRUM spect  
PROBHD 5 mm PABBO BB-  
PULPROG zg30  
TD 65536  
SOLVENT CDC13  
NS 16  
DS 2  
SWH 8223.685 Hz  
FIDRES 0.125483 Hz  
AQ 3.9846387 sec  
RG 32  
DW 60.800 usec  
DE 6.50 usec  
TE 303.1 K  
D1 1.00000000 sec  
TD0 1

===== CHANNEL f1 =====  
NUC1 1H  
P1 12.50 usec  
PL1 -2.00 dB  
PL1W 12.14226913 W  
SFO1 400.1524711 MHz  
SI 32768  
SF 400.1500000 MHz  
WDW EM  
SSB 0  
LB 0.30 Hz  
GB 0  
PC 1.00

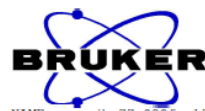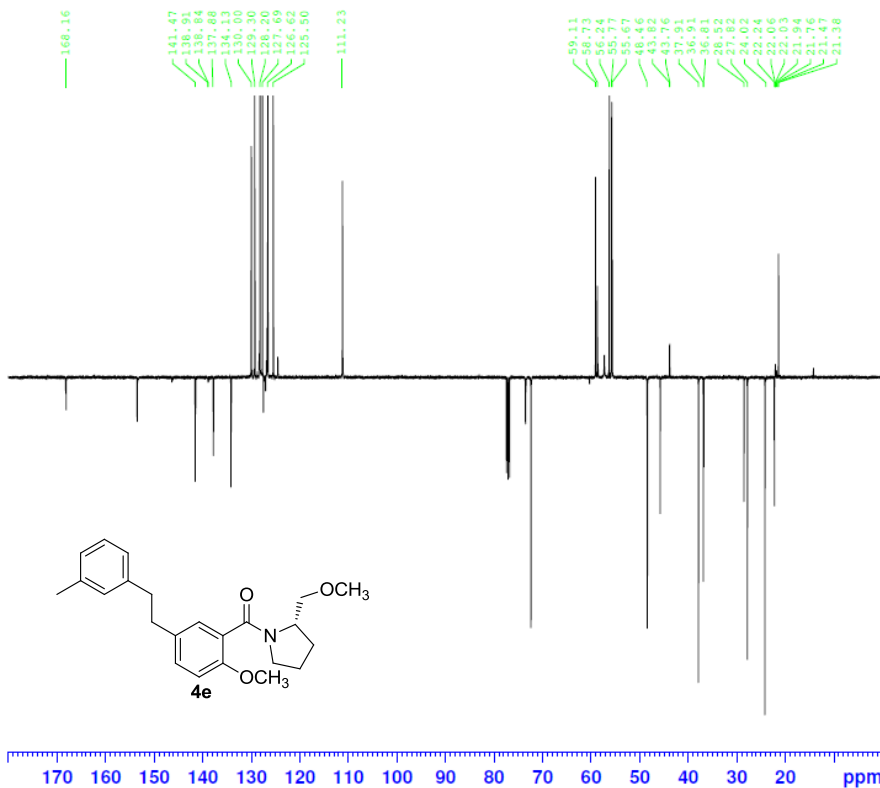

NAME sjb\_77\_020fp 13CAPT  
EXPNO 1  
PROCNO 1  
Date\_ 20121221  
Time 12.46  
INSTRUM spect  
PROBHD 5 mm PABBO BB-  
PULPROG jmod  
TD 65536  
SOLVENT CDC13  
NS 1024  
DS 4  
SWH 18115.941 Hz  
FIDRES 0.276427 Hz  
AQ 1.8088436 sec  
RG 203  
DW 27.600 usec  
DE 6.50 usec  
TE 302.2 K  
CNST2 145.0000000  
CNST11 1.0000000  
D1 2.00000000 sec  
D20 0.00689655 sec  
TD0 1

===== CHANNEL f1 =====  
NUC1 13C  
P1 8.00 usec  
P2 16.00 usec  
PL1 -2.00 dB  
PL1W 56.13311005 W  
SFO1 100.6268536 MHz

===== CHANNEL f2 =====  
CPDPRG2 waltz16  
NUC2 1H  
PCPD2 80.00 usec  
PL2 -2.00 dB  
PL12 14.00 dB  
PL12W 12.14226913 W  
PL12W 0.30500001 W  
SFO2 400.1514742 MHz  
SI 32768  
SF 100.6177980 MHz  
WDW EM  
SSB 0  
LB 1.00 Hz  
GB 0  
PC 1.40

# Area Percent Report

Data Path : C:\msdchem\1\DATA\  
Data File : sjb\_77\_020fp.D  
Acq On : 21 Dec 2012 11:20  
Operator : sjb  
Sample : sjb\_77\_020fp  
Misc :  
ALS Vial : 20 Sample Multiplier: 1

Integration Parameters: autoint1.e  
Integrator: ChemStation

Method : C:\msdchem\1\5973N\PRECISION.M  
Title :

Signal : TIC: sjb\_77\_020fp.D\data.ms

| peak<br># | R.T.<br>min | first<br>scan | max<br>scan | last<br>scan | PK<br>TY | peak<br>height | corr.<br>area | corr.<br>% max. | % of<br>total |
|-----------|-------------|---------------|-------------|--------------|----------|----------------|---------------|-----------------|---------------|
| 1         | 8.530       | 682           | 690         | 708          | BV 5     | 27940          | 1033448       | 0.10%           | 0.092%        |
| 2         | 12.424      | 1351          | 1371        | 1395         | PV       | 2774270        | 64363753      | 6.16%           | 5.746%        |
| 3         | 12.680      | 1408          | 1415        | 1425         | VV 2     | 28357          | 755335        | 0.07%           | 0.067%        |
| 4         | 13.142      | 1463          | 1496        | 1523         | PV 2     | 24682415       | 1044588528    | 100.00%         | 93.256%       |
| 5         | 13.303      | 1523          | 1524        | 1533         | VV 6     | 187569         | 4711073       | 0.45%           | 0.421%        |
| 6         | 13.361      | 1533          | 1534        | 1567         | VV 8     | 94639          | 4673192       | 0.45%           | 0.417%        |

Sum of corrected areas: 1120125329

Abundance

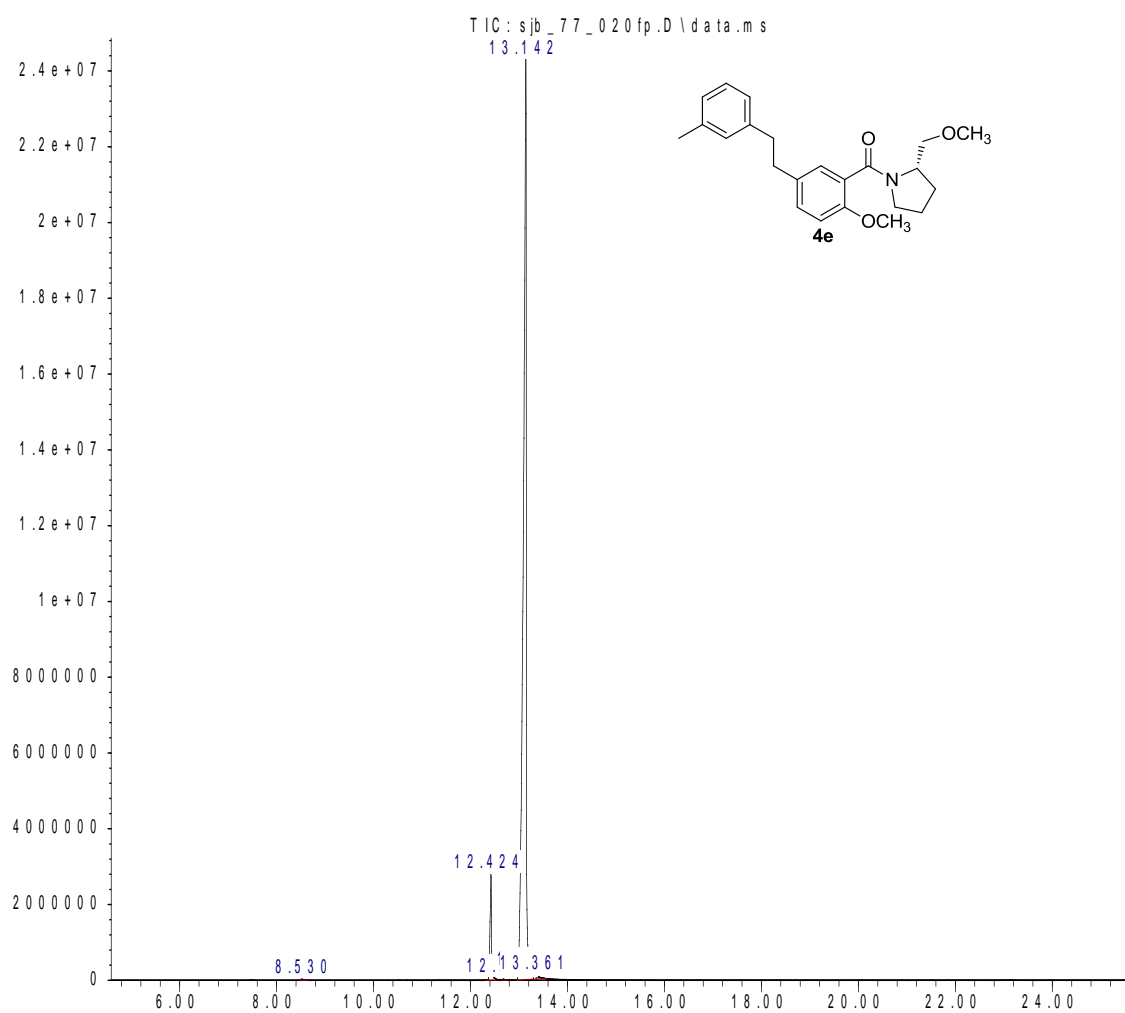

Time -->

Abundance

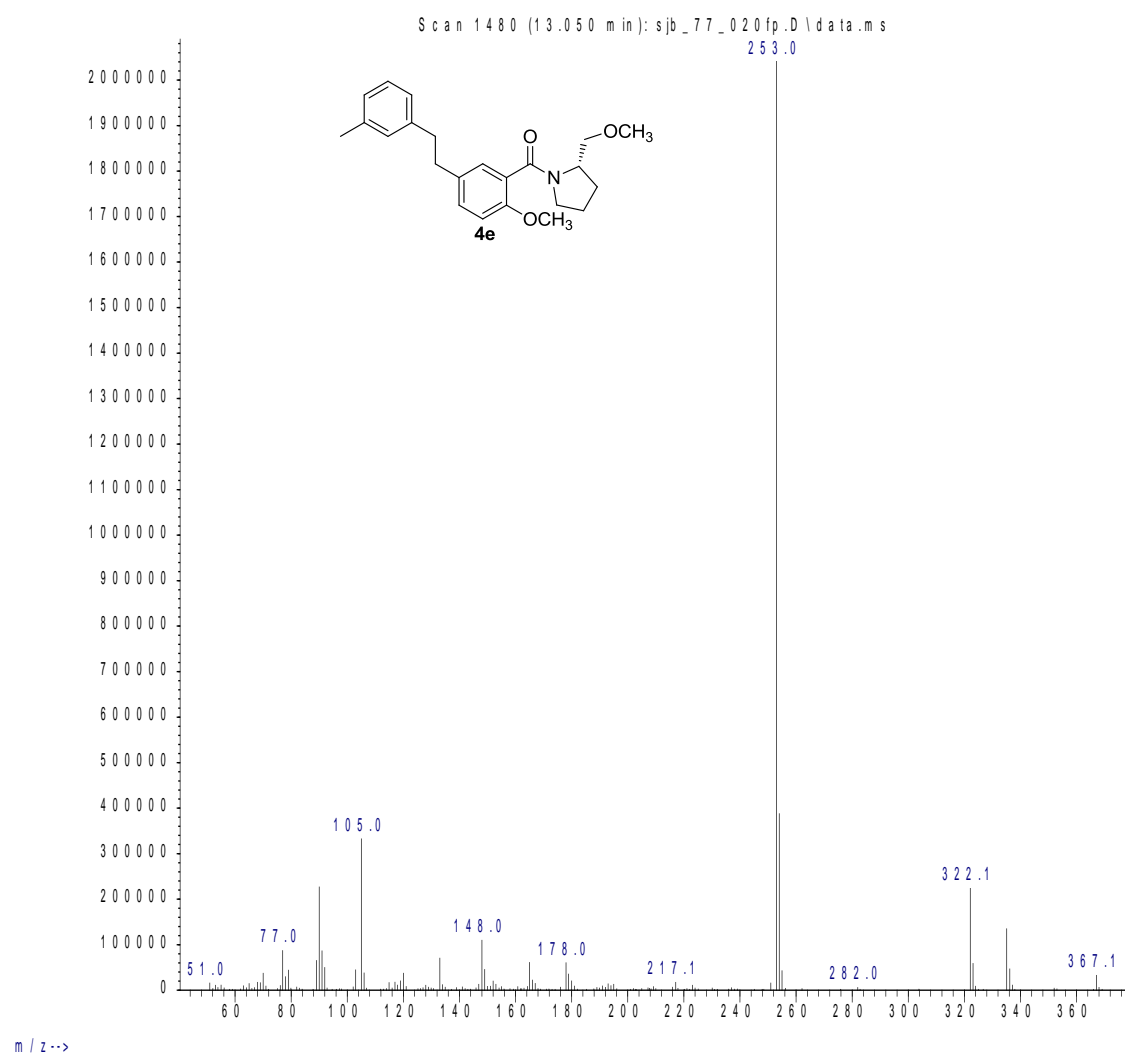

Abundance

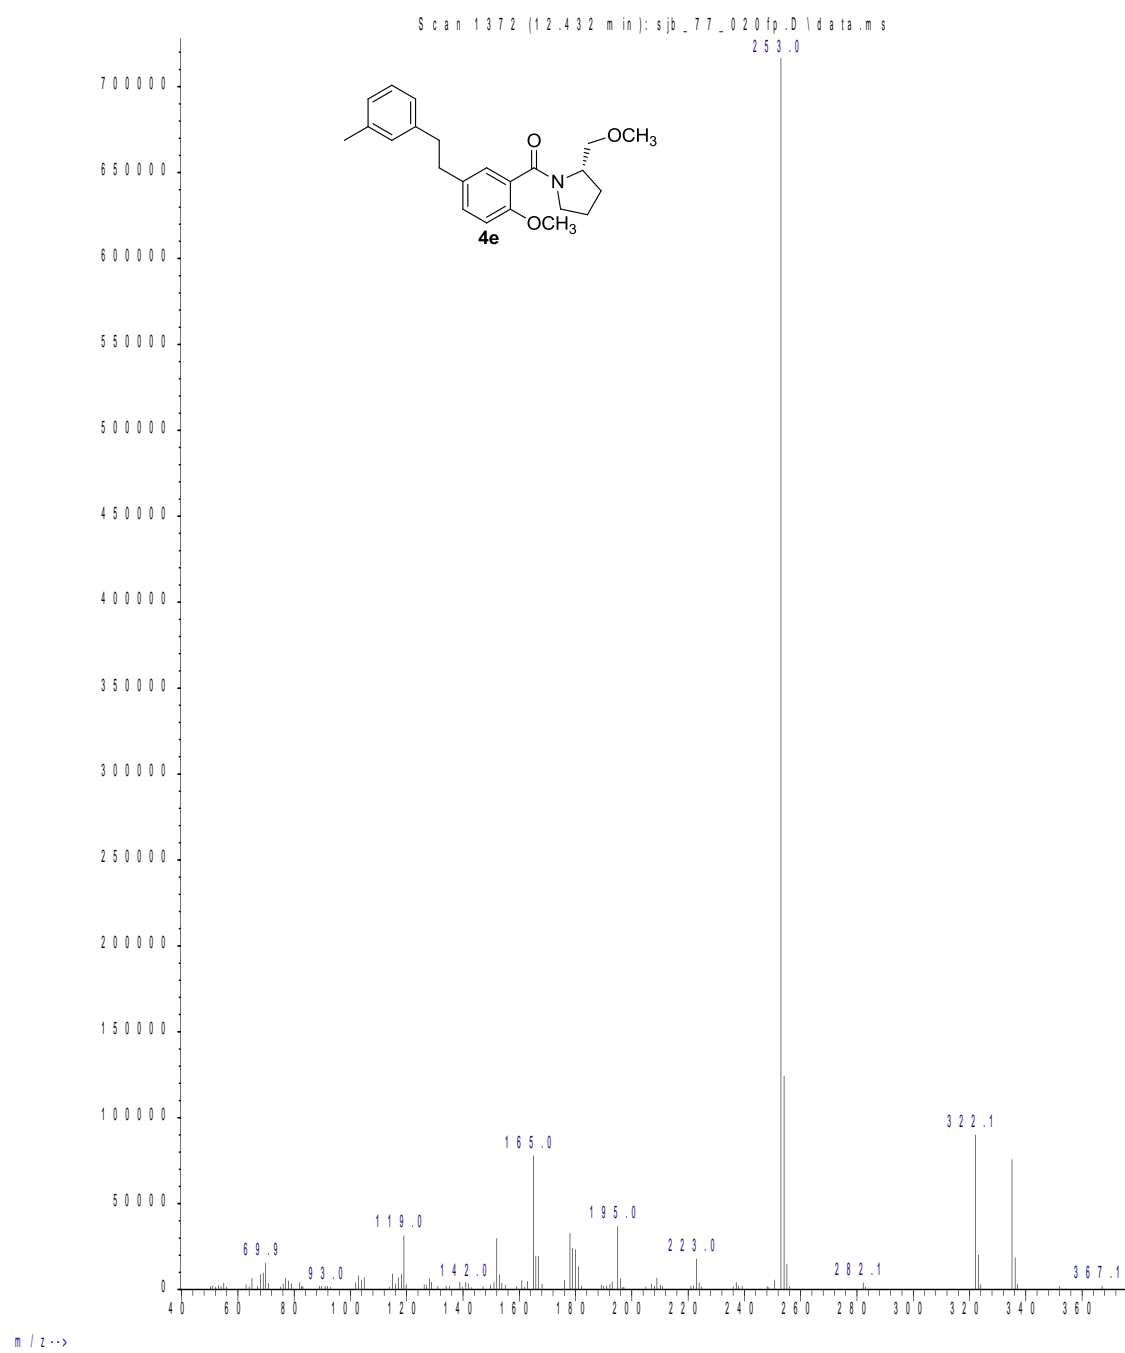

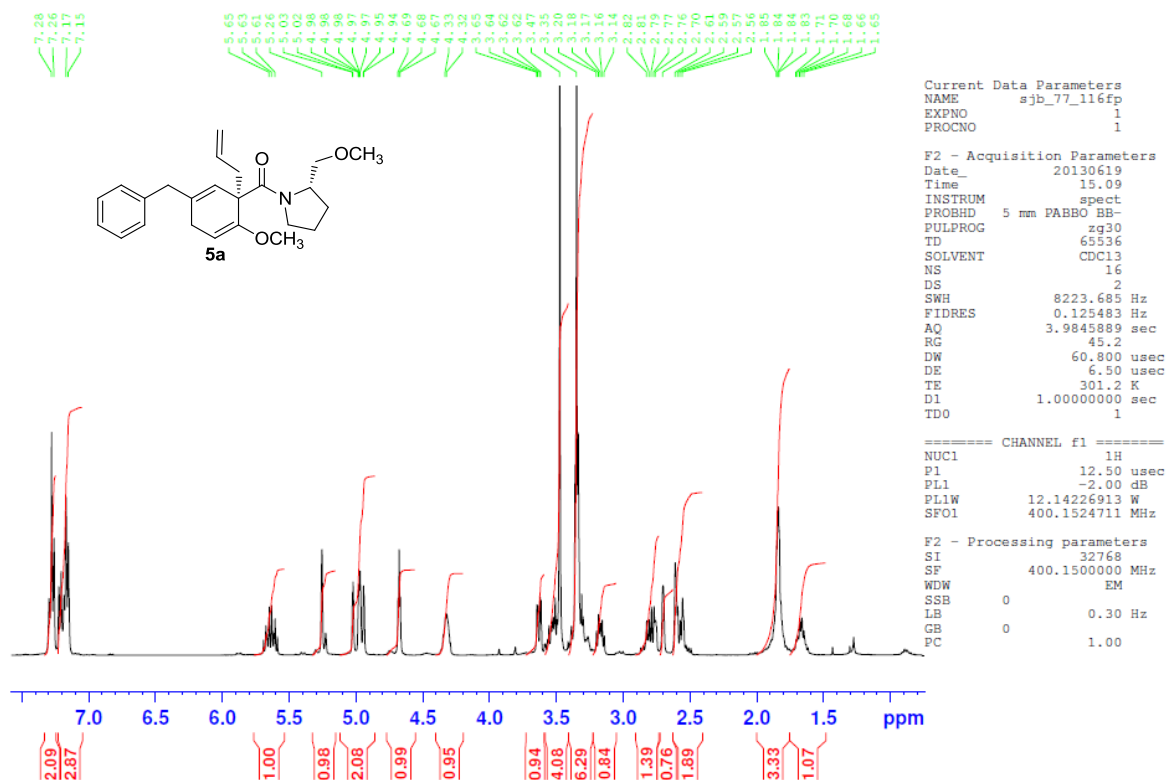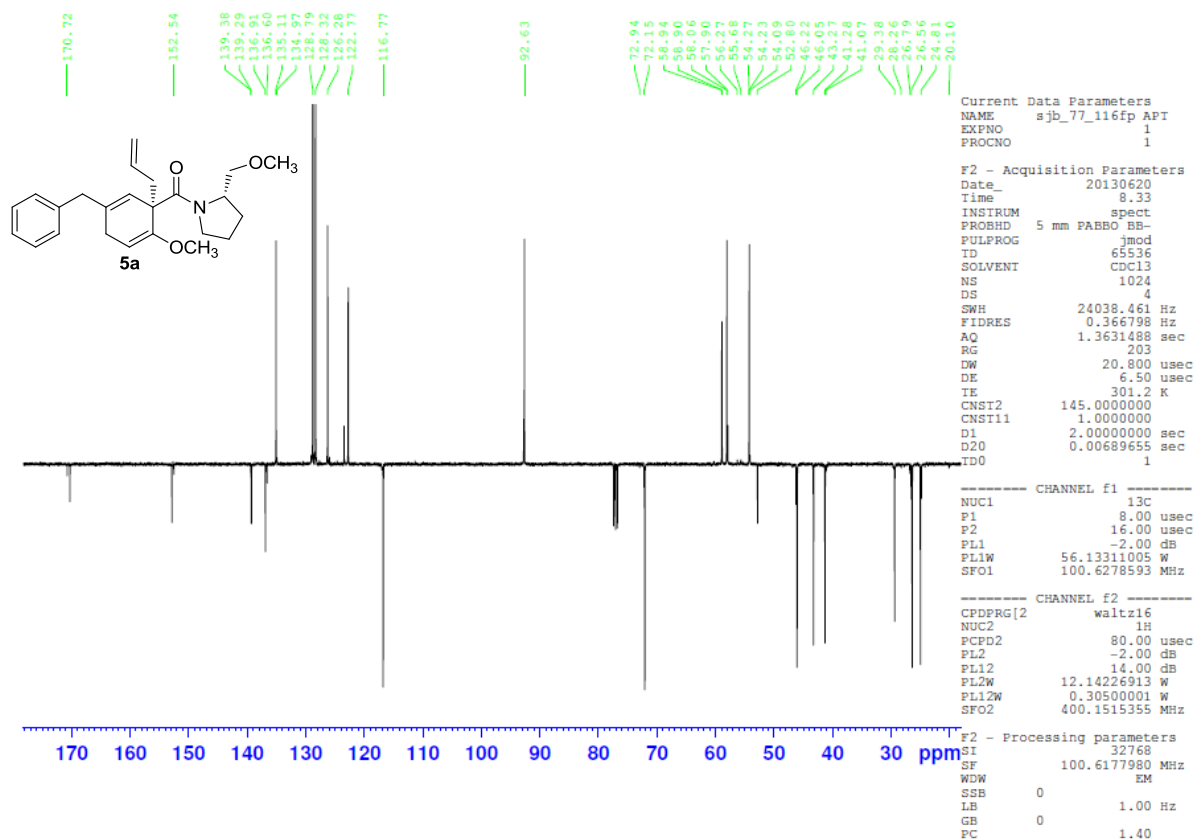

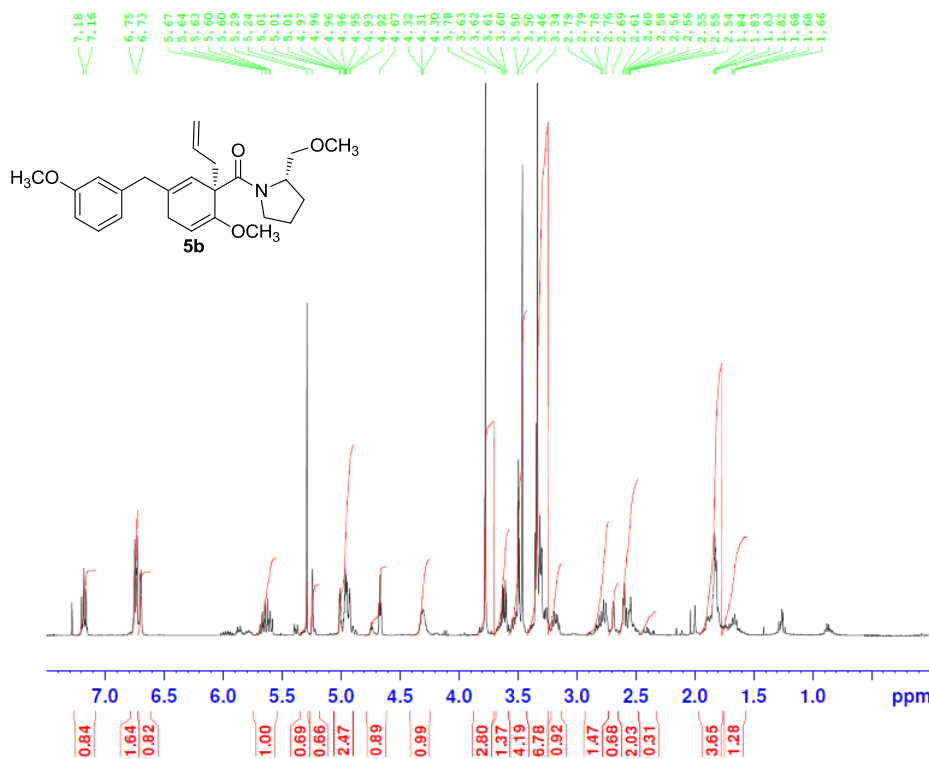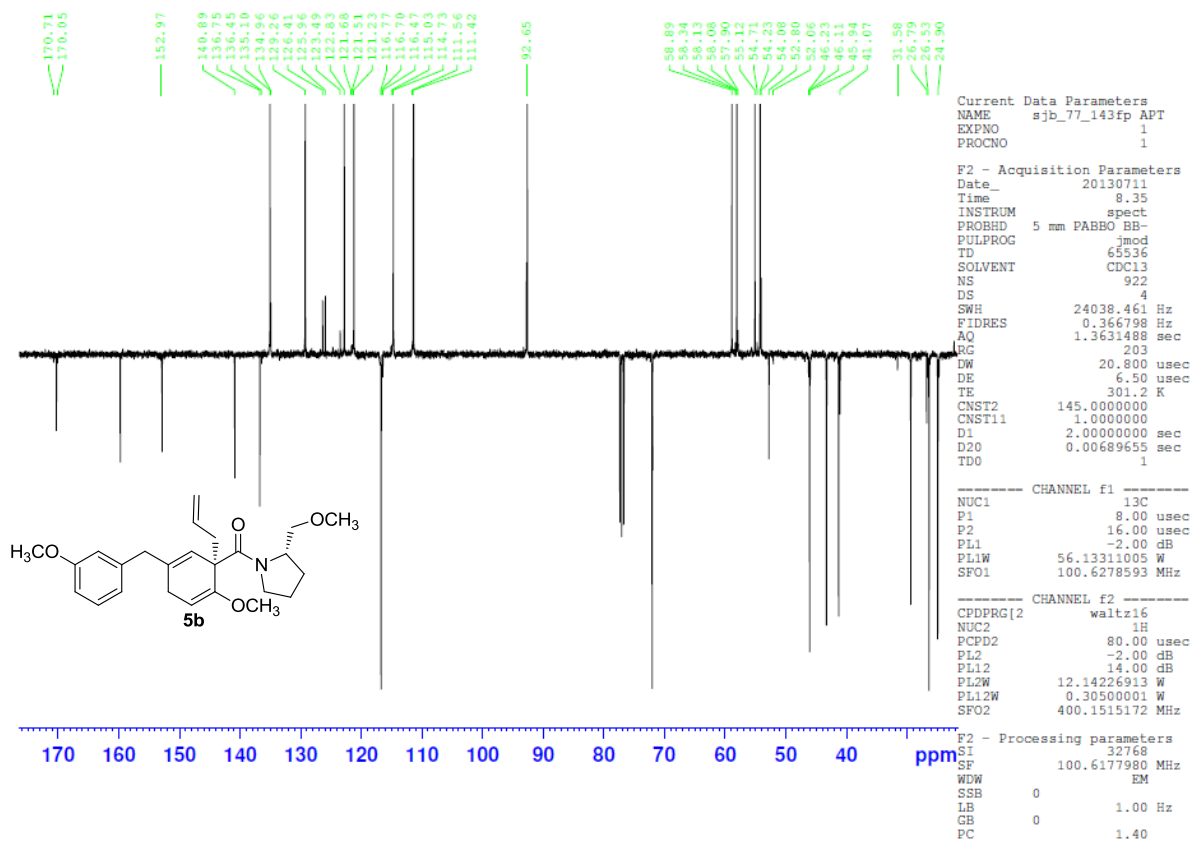

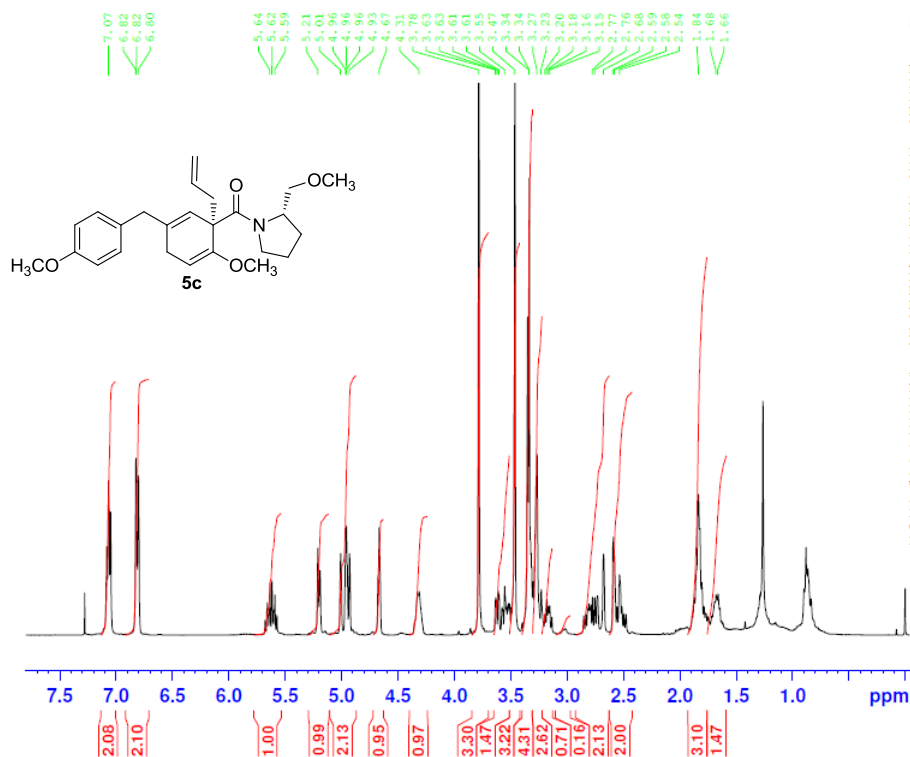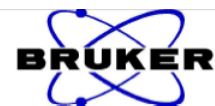

NAME sjb\_74\_009fp  
EXPNO 1  
PROCNO 1  
Date\_ 20120531  
Time 16.05  
INSTRUM spect  
PROBHD 5 mm PABBO BB-  
PULPROG zg30  
TD 65536  
SOLVENT CDC13  
NS 16  
DS 2  
SWH 8223.685 Hz  
FIDRES 0.125483 Hz  
AQ 3.9846387 sec  
RG 32  
DW 60.800 usec  
DE 6.50 usec  
TE 301.2 K  
D1 1.0000000 sec  
TD0 1

===== CHANNEL f1 =====  
NUC1 1H  
P1 12.50 usec  
PL1 -2.00 dB  
PL1W 12.14226913 W  
SF01 400.1524711 MHz  
SI 32768  
SF 400.1500000 MHz  
WDW EM  
SSB 0  
LB 0.30 Hz  
GB 0  
PC 1.00

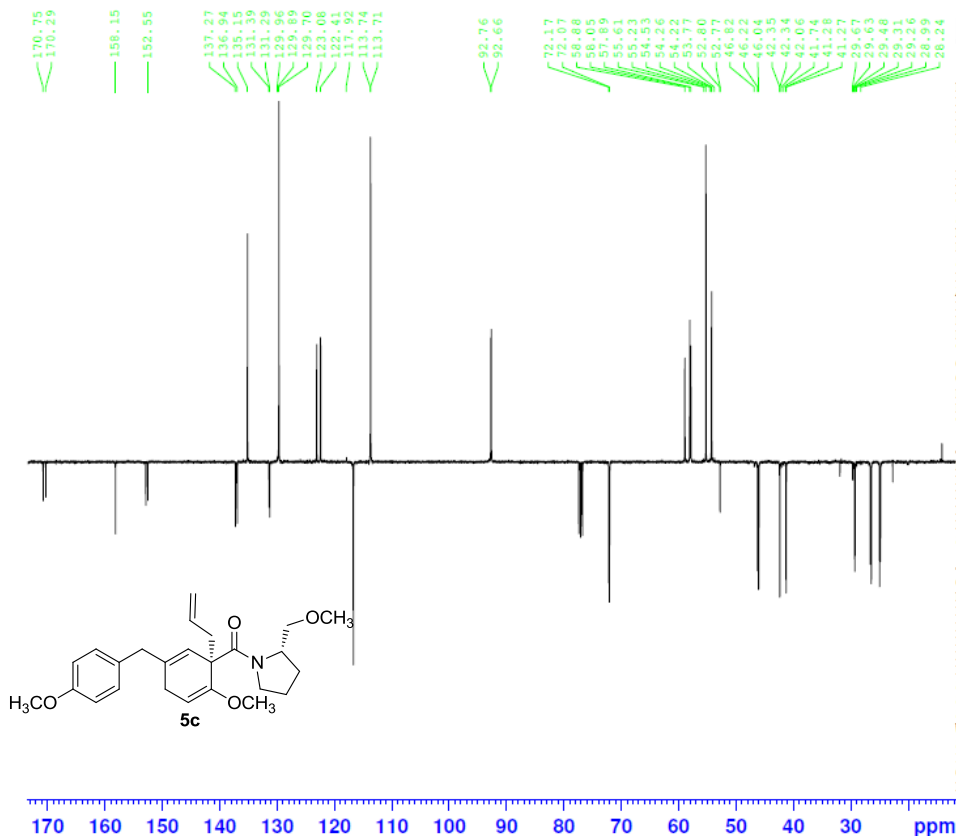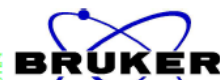

NAME sjb\_74\_218fp 13CAPT  
EXPNO 1  
PROCNO 1  
Date\_ 20121206  
Time 12.49  
INSTRUM spect  
PROBHD 5 mm PABBO BB-  
PULPROG jmod  
TD 65536  
SOLVENT CDC13  
NS 1024  
DS 4  
SWH 18115.941 Hz  
FIDRES 0.276427 Hz  
AQ 1.8088436 sec  
RG 203  
DW 27.600 usec  
DE 6.50 usec  
TE 301.2 K  
CNST2 145.0000000  
CNST11 1.0000000  
D1 2.0000000 sec  
D20 0.00689655 sec  
TD0 1

----- CHANNEL f1 -----  
NUC1 13C  
P1 8.00 usec  
P2 16.00 usec  
PL1 -2.00 dB  
PL1W 56.13311005 W  
SF01 100.6265472 MHz

----- CHANNEL f2 -----  
CPDPRG2 waltz16  
NUC2 1H  
PCPD2 80.00 usec  
PL2 -2.00 dB  
PL12 14.00 dB  
PL2W 12.14226913 W  
SF02 400.1515072 MHz  
SI 32768  
SF 100.6177980 MHz  
WDW EM  
SSB 0  
LB 1.00 Hz  
GB 0  
PC 1.40

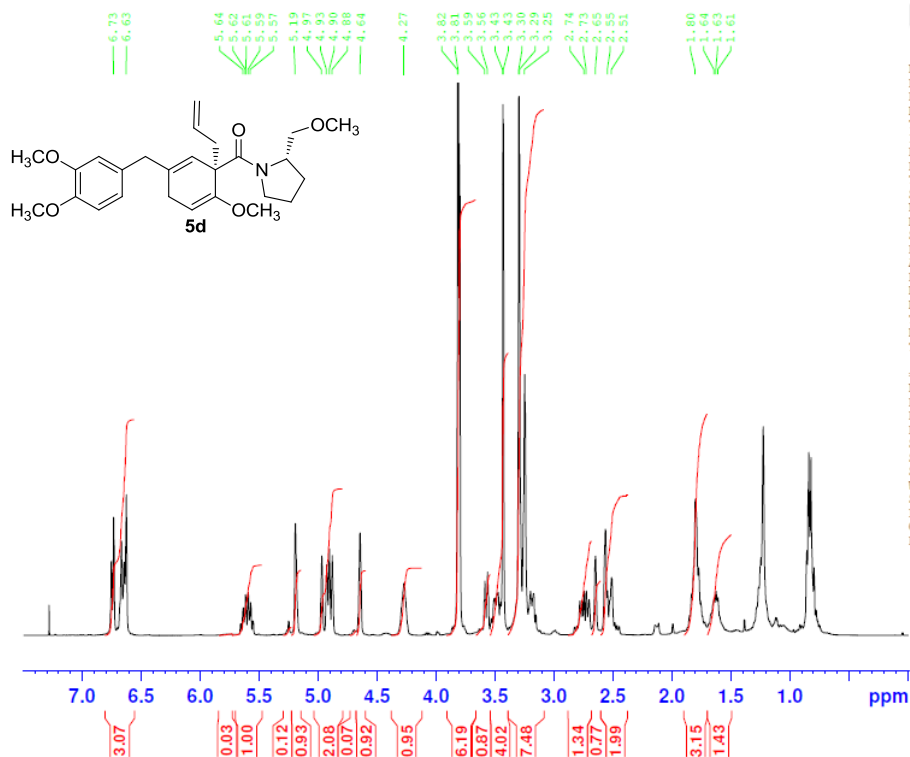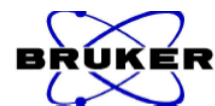

NAME sjb\_74\_153fp  
EXPNO 1  
PROCNO 1  
Date\_ 20121002  
Time 16.06  
INSTRUM spect  
PROBHD 5 mm DUL 13C-1  
PULPROG zg30  
TD 65536  
SOLVENT CDCl3  
NS 16  
DS 2  
SWH 8223.685 Hz  
FIDRES 0.125483 Hz  
AQ 3.9846387 sec  
RG 22.6  
DW 60.800 usec  
DE 6.50 usec  
TE 301.2 K  
D1 1.00000000 sec  
TD0 1

===== CHANNEL f1 =====  
NUC1 1H  
P1 9.80 usec  
PL1 -4.00 dB  
PL1W 19.24419975 W  
SFO1 400.1524711 MHz  
SI 32768  
SF 400.1500000 MHz  
WDW EM  
SSB 0  
LB 0.30 Hz  
GB 0  
PC 1.00

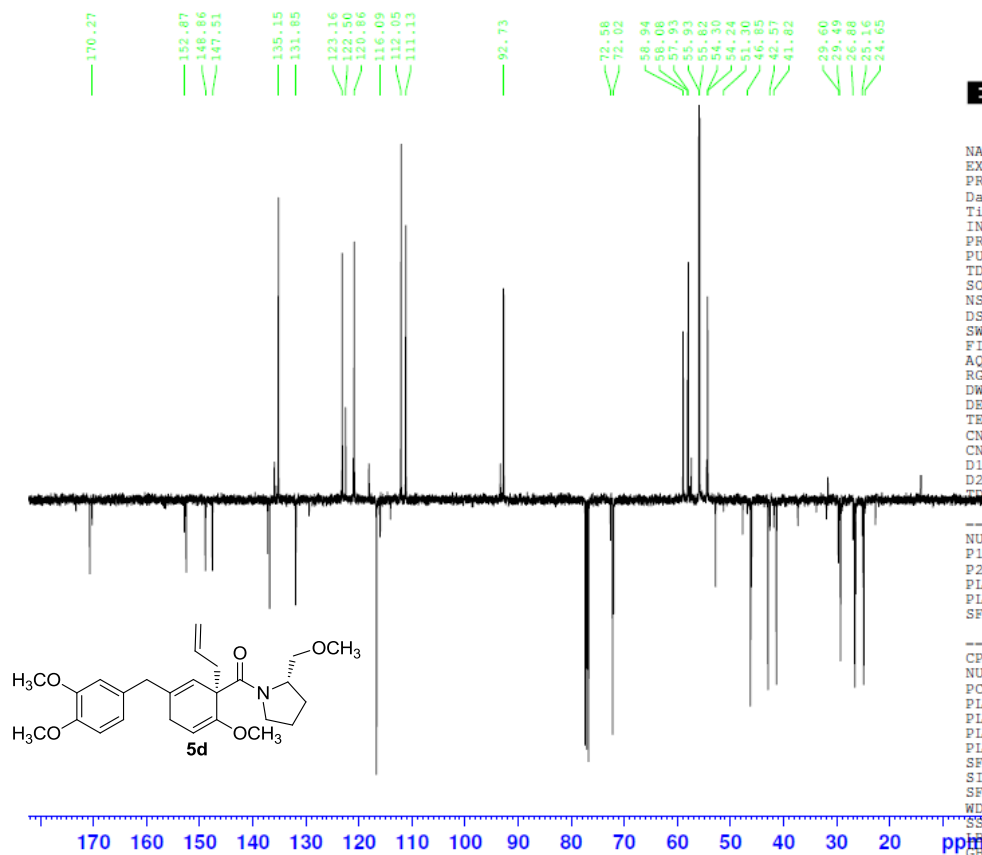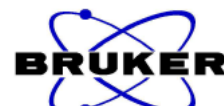

NAME sjb\_77\_119fp APT  
EXPNO 1  
PROCNO 1  
Date\_ 20130621  
Time 8.47  
INSTRUM spect  
PROBHD 5 mm PABBO BB-  
PULPROG jmod  
TD 65536  
SOLVENT CDCl3  
NS 1024  
DS 4  
SWH 24038.461 Hz  
FIDRES 0.366798 Hz  
AQ 1.3631988 sec  
RG 203  
DW 20.800 usec  
DE 6.50 usec  
TE 301.2 K  
CNST2 145.0000000  
CNST11 1.0000000  
D1 2.00000000 sec  
D20 0.00689655 sec  
TD0 1

----- CHANNEL f1 -----  
NUC1 13C  
P1 8.00 usec  
P2 16.00 usec  
PL1 -2.00 dB  
PL1W 56.13311005 W  
SFO1 100.6278593 MHz

----- CHANNEL f2 -----  
CPDPRG2 waltz16  
NUC2 1H  
PCPD2 80.00 usec  
PL2 -2.00 dB  
PL12 14.00 dB  
PL2W 12.14226913 W  
PL12W 0.30500001 W  
SFO2 400.1514270 MHz  
SI 32768  
SF 100.6177980 MHz  
WDW EM  
SSB 0  
LB 1.00 Hz  
GB 0  
PC 1.40

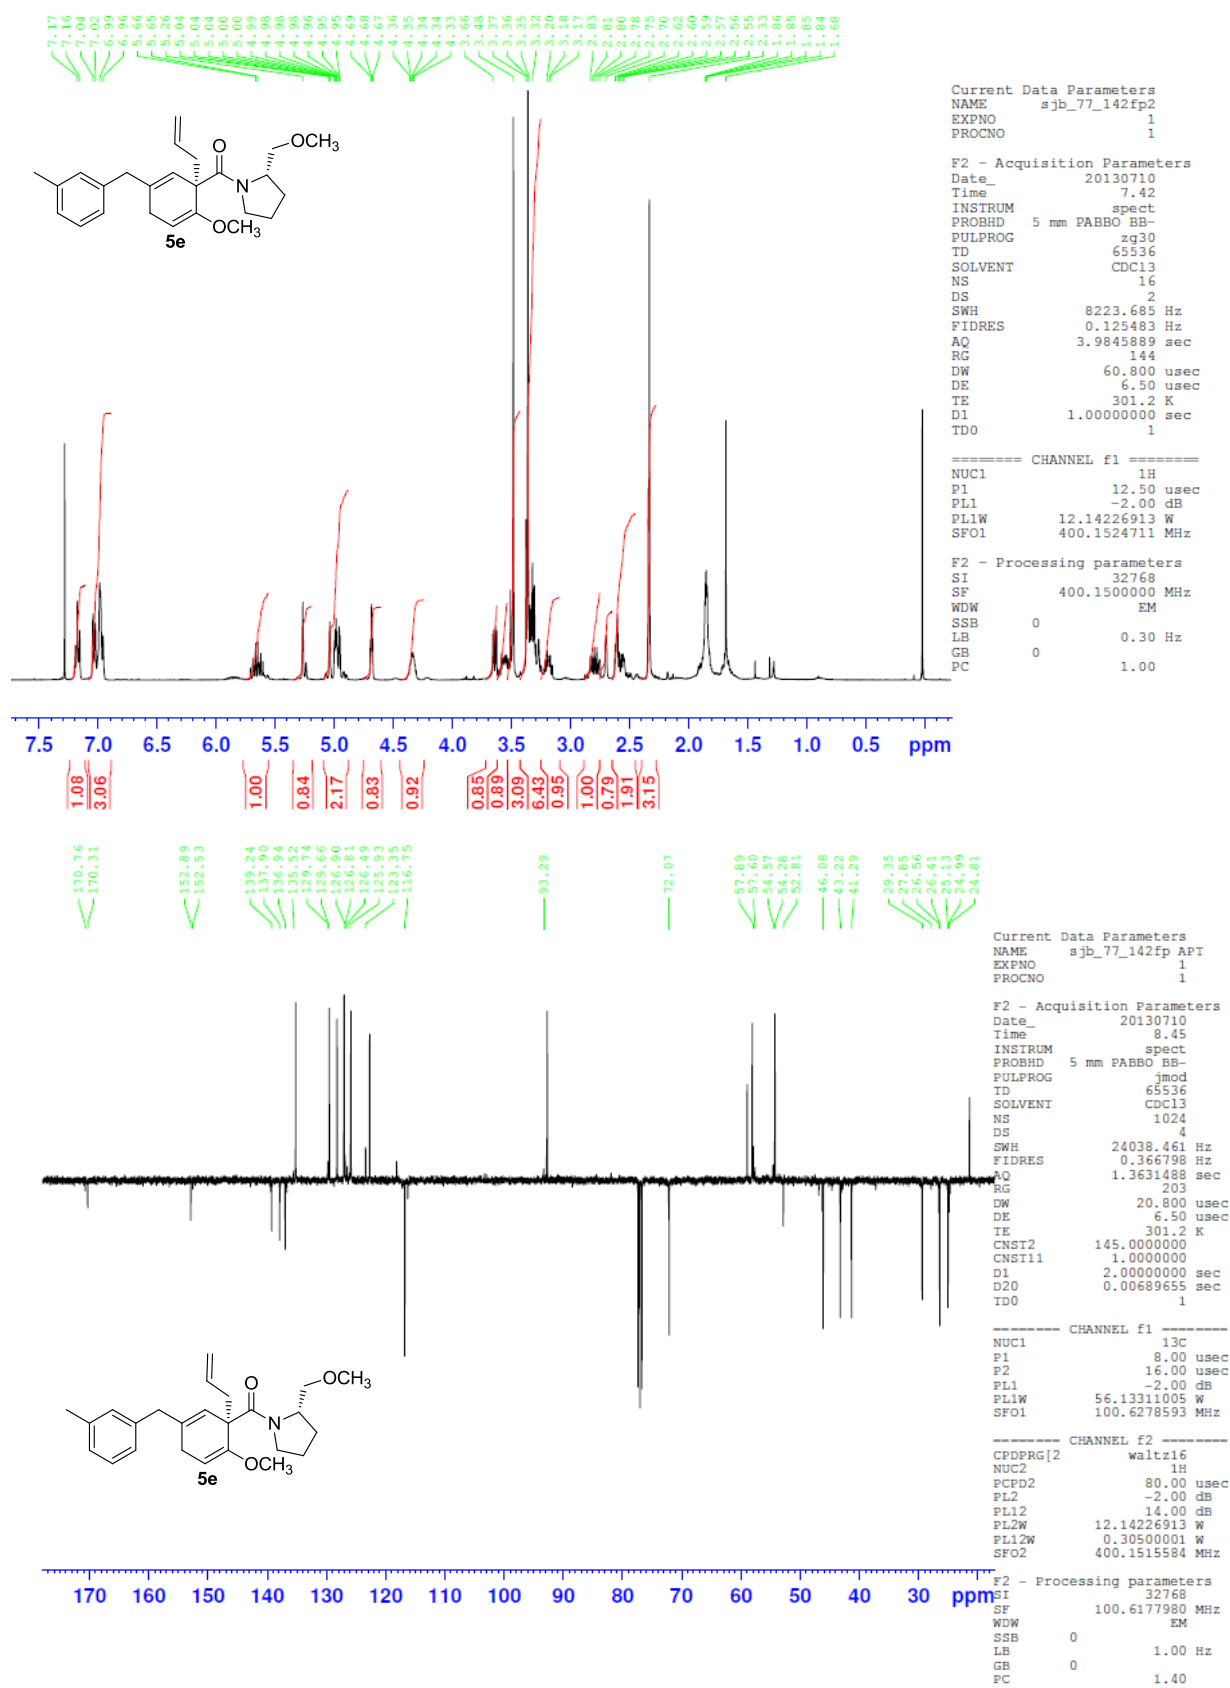



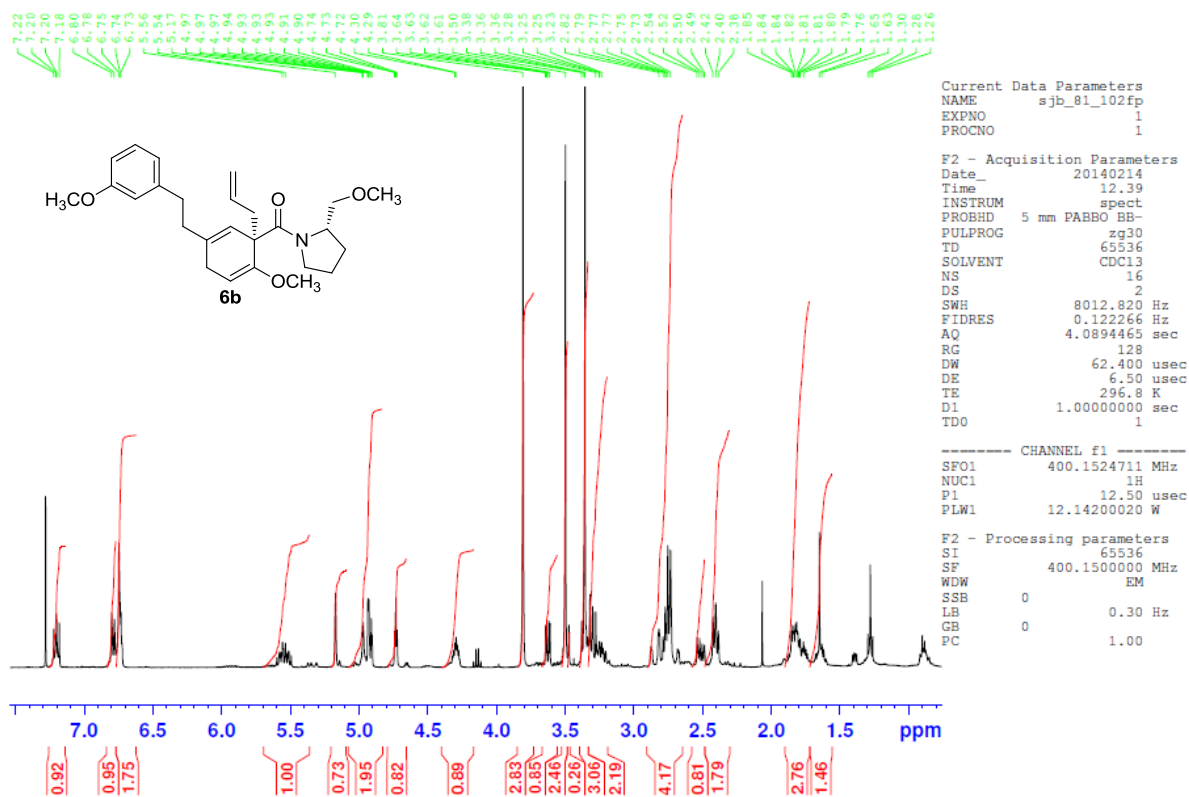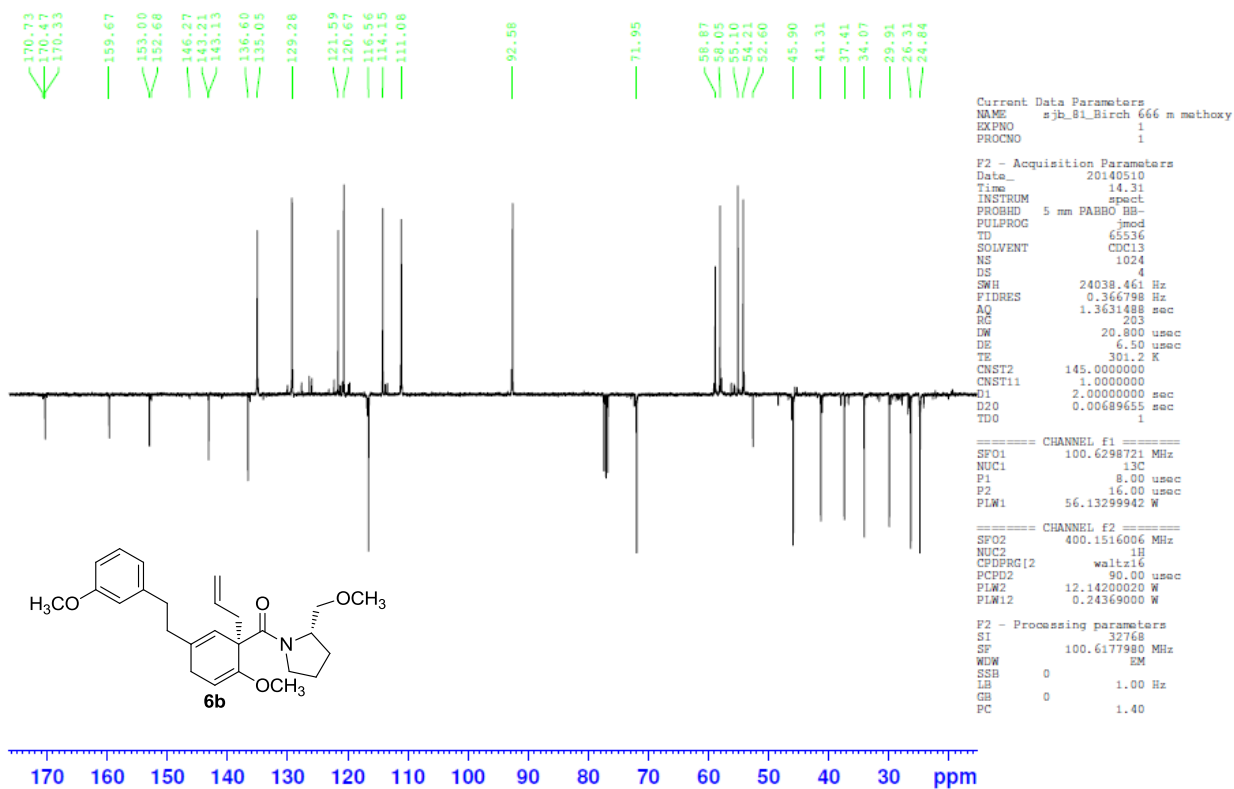

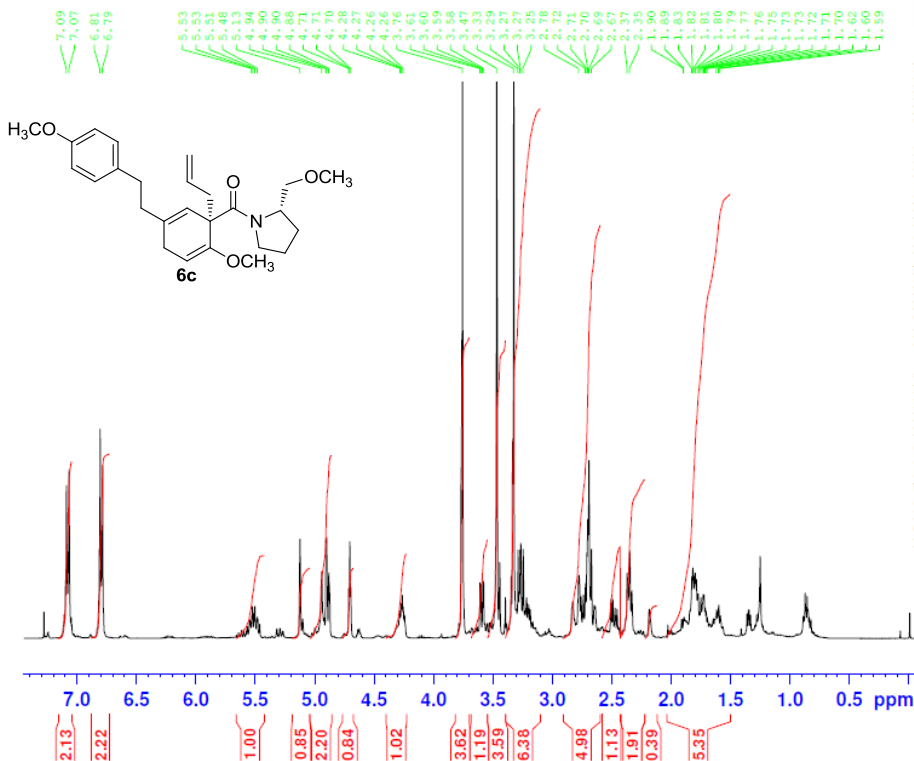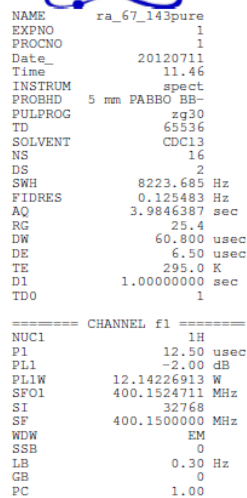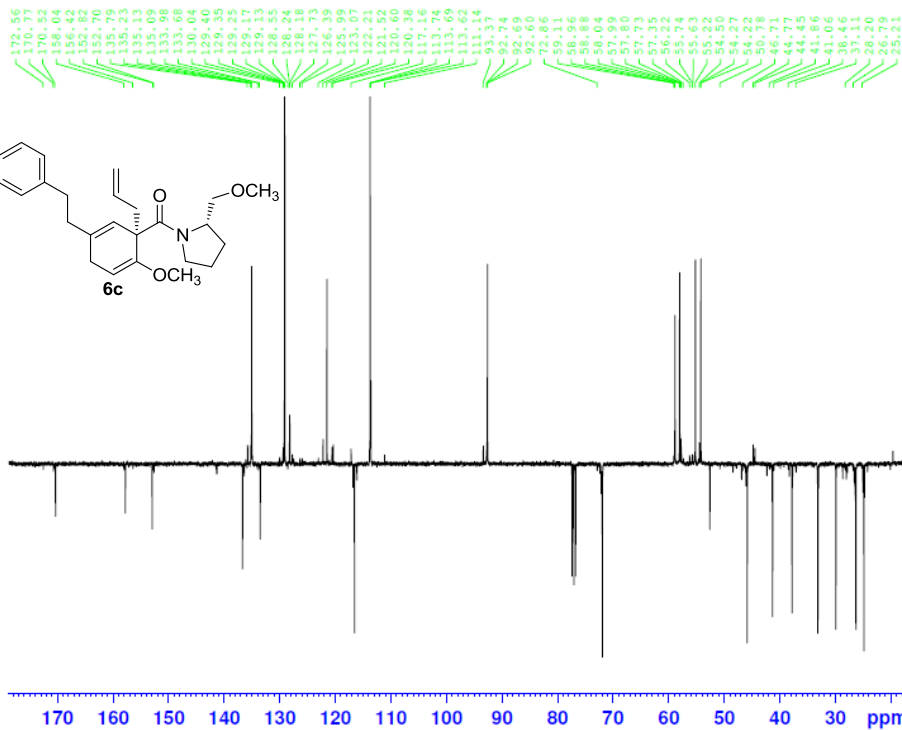

S71

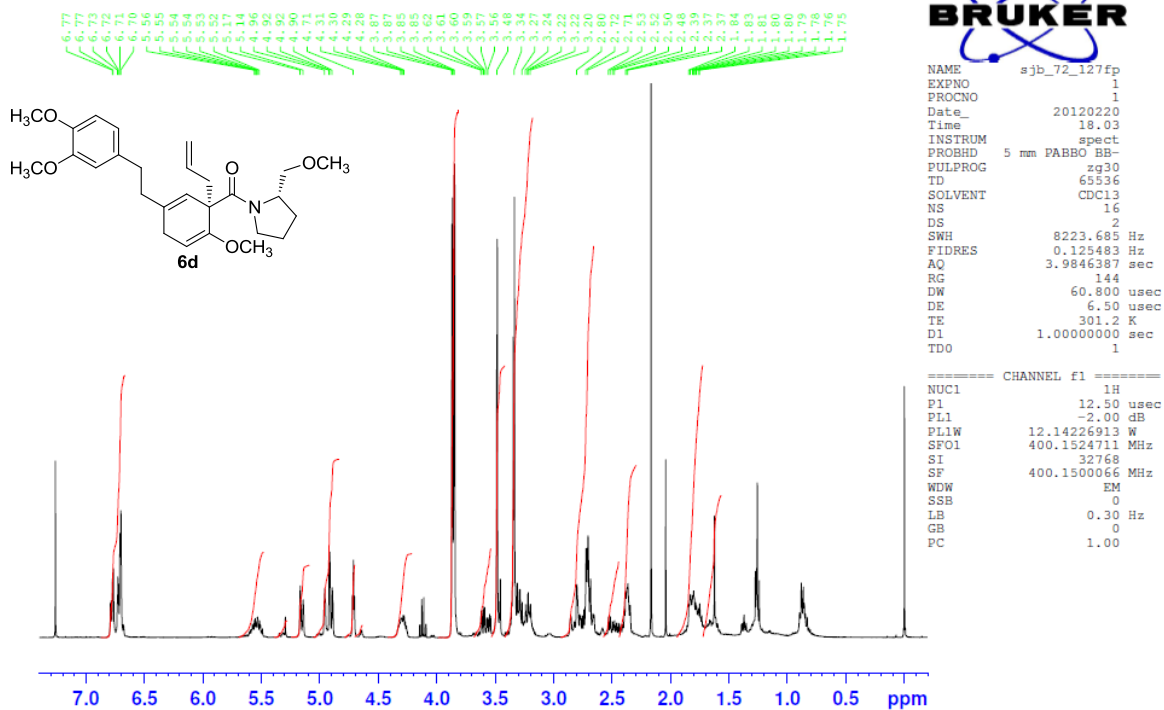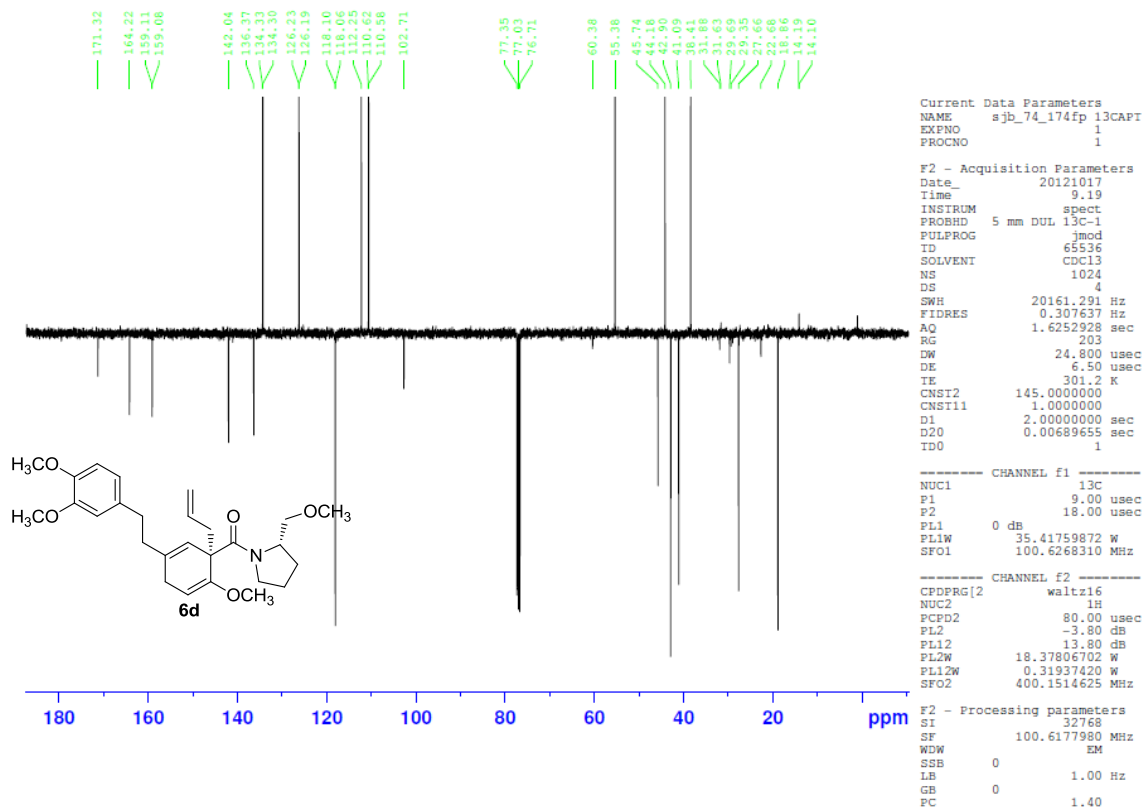

## Analysis of stereoselectivity in the Birch reduction-allylation of 4d

### 1. Enantioselective reaction (LC trace of UV detector reading)

Data File C:\CHEM32\1\DATA\SJB\_81\_086CM.D

Sample Name: sjb\_81\_086cm

```
=====
Acq. Operator   : SYSTEM
Acq. Instrument : HPLC                      Location : Vial 1
Injection Date  : 1/17/2014 12:22:33 PM
                                           Inj Volume : Manually
Method          : C:\CHEM32\1\METHODS\HILIC1.M
Last changed    : 1/17/2014 12:20:27 PM by SYSTEM
                  (modified after loading)
Sample Info     : sjb_81_086 crude in 85:15 Hexanes:IPA run in 85:15 Hexanes:IPA at 0.250 mL
                  /min for 25 min.
```

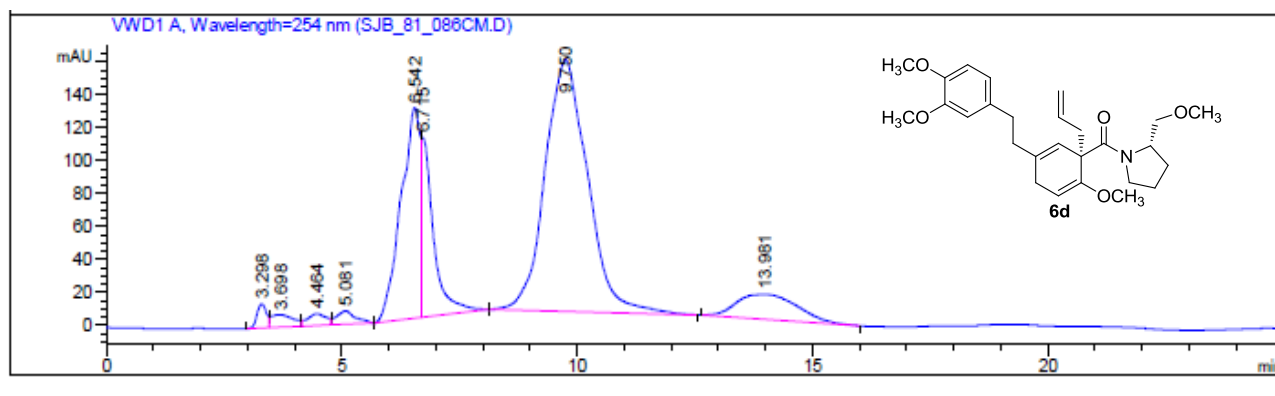

Signal 2: VWD1 A, Wavelength=254 nm

| Peak # | RetTime [min] | Type | Width [min] | Area [mAU*s] | Height [mAU] | Area %  |
|--------|---------------|------|-------------|--------------|--------------|---------|
| 1      | 3.298         | BV   | 0.2191      | 203.46292    | 14.49135     | 1.1677  |
| 2      | 3.698         | VV   | 0.4577      | 243.59489    | 7.32784      | 1.3980  |
| 3      | 4.464         | VV   | 0.3829      | 197.91856    | 7.17767      | 1.1359  |
| 4      | 5.081         | VB   | 0.4071      | 224.77737    | 7.94808      | 1.2900  |
| 5      | 6.542         | BV   | 0.3841      | 3654.93994   | 128.00078    | 20.9763 |
| 6      | 6.715         | VB   | 0.2498      | 1885.33069   | 109.02492    | 10.8202 |
| 7      | 9.750         | BB   | 0.9449      | 9656.28906   | 152.91478    | 55.4191 |
| 8      | 13.981        | BB   | 1.2294      | 1357.81055   | 14.95760     | 7.7927  |

Totals : 1.74241e4 441.84302

## 2. Non-enantioselective (LC trace of UV detector reading)

Data File C:\CHEM32\1\DATA\SJB\_81\_087CM.D

Sample Name: sjb\_81\_087cm

```
=====
Acq. Operator   : SYSTEM
Acq. Instrument : HPLC
Injection Date  : 1/17/2014 3:35:52 PM
Location        : Vial 1
Inj Volume      : Manually

Method          : C:\CHEM32\1\METHODS\HILIC1.M
Last changed    : 1/17/2014 12:20:27 PM by SYSTEM
                  (modified after loading)
Sample Info     : sjb_81_087cm in 85:15 Hexanes:IPA run in 85:15 Hexanes:IPA at 0.250 mL/min
                  for 25 min.
```

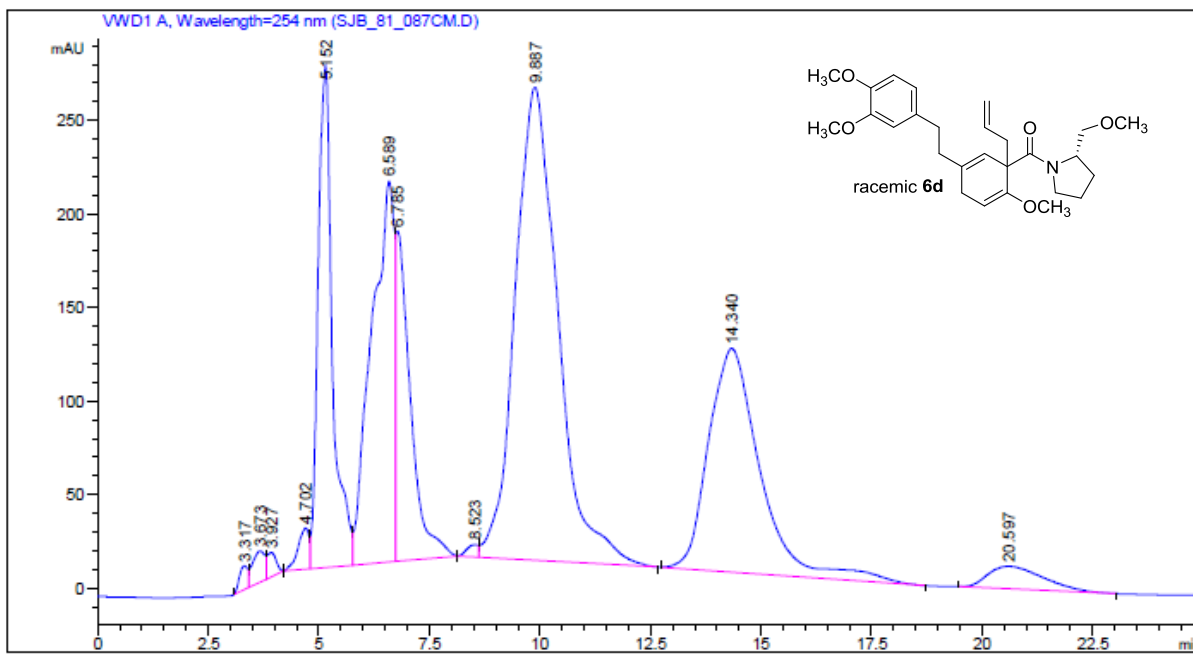

=====  
Area Percent Report  
=====

Sorted By : Signal  
Multiplier : 1.0000  
Dilution : 1.0000  
Use Multiplier & Dilution Factor with ISTDs

Signal 1: VWD1 A, Wavelength=254 nm

| Peak # | RetTime [min] | Type | Width [min] | Area [mAU*s] | Height [mAU] | Area %  |
|--------|---------------|------|-------------|--------------|--------------|---------|
| 1      | 3.317         | BV   | 0.2026      | 161.71326    | 12.68614     | 0.3488  |
| 2      | 3.673         | VV   | 0.2997      | 329.34979    | 16.61233     | 0.7104  |
| 3      | 3.927         | VB   | 0.2226      | 191.60265    | 12.91174     | 0.4133  |
| 4      | 4.702         | BV   | 0.2670      | 377.67203    | 22.03365     | 0.8146  |
| 5      | 5.152         | VV   | 0.3515      | 6101.32959   | 268.04456    | 13.1599 |
| 6      | 6.589         | VV   | 0.4678      | 7244.44189   | 203.48740    | 15.6255 |
| 7      | 6.785         | VB   | 0.3230      | 4046.57104   | 176.38852    | 8.7280  |
| 8      | 8.523         | BV   | 0.2815      | 114.57014    | 6.49611      | 0.2471  |
| 9      | 9.887         | VB   | 0.9084      | 1.70311e4    | 252.78012    | 36.7342 |
| 10     | 14.340        | BB   | 1.2435      | 9709.70996   | 119.50664    | 20.9428 |
| 11     | 20.597        | BB   | 1.2449      | 1055.00098   | 11.95725     | 2.2755  |

Totals : 4.63631e4 1102.90446

Peak explanation:

| retention time (min.) | Compound                                            |
|-----------------------|-----------------------------------------------------|
| 5.1                   | 1S enantiomer                                       |
| 6.5-6.7               | 1R enantiomer                                       |
| 9.8                   | gamma-alkylation product of Birch reduction         |
| 14                    | unreacted aromatic starting material                |
| 20.6                  | regioisomer of unreacted aromatic starting material |

Analysis: Enantioselective reaction shows a small amount of the 1S enantiomer, 1.29%. Therefore the enantioselectivity must be approximately 24:1 (31.8/1.29).

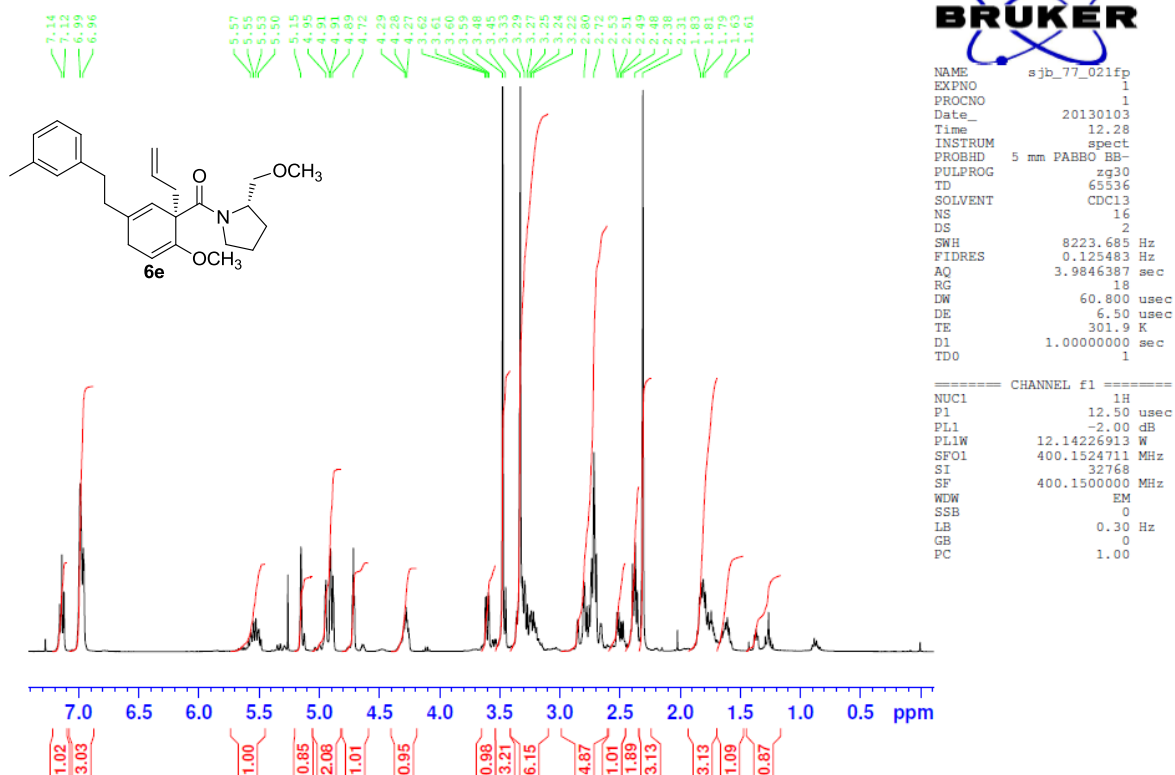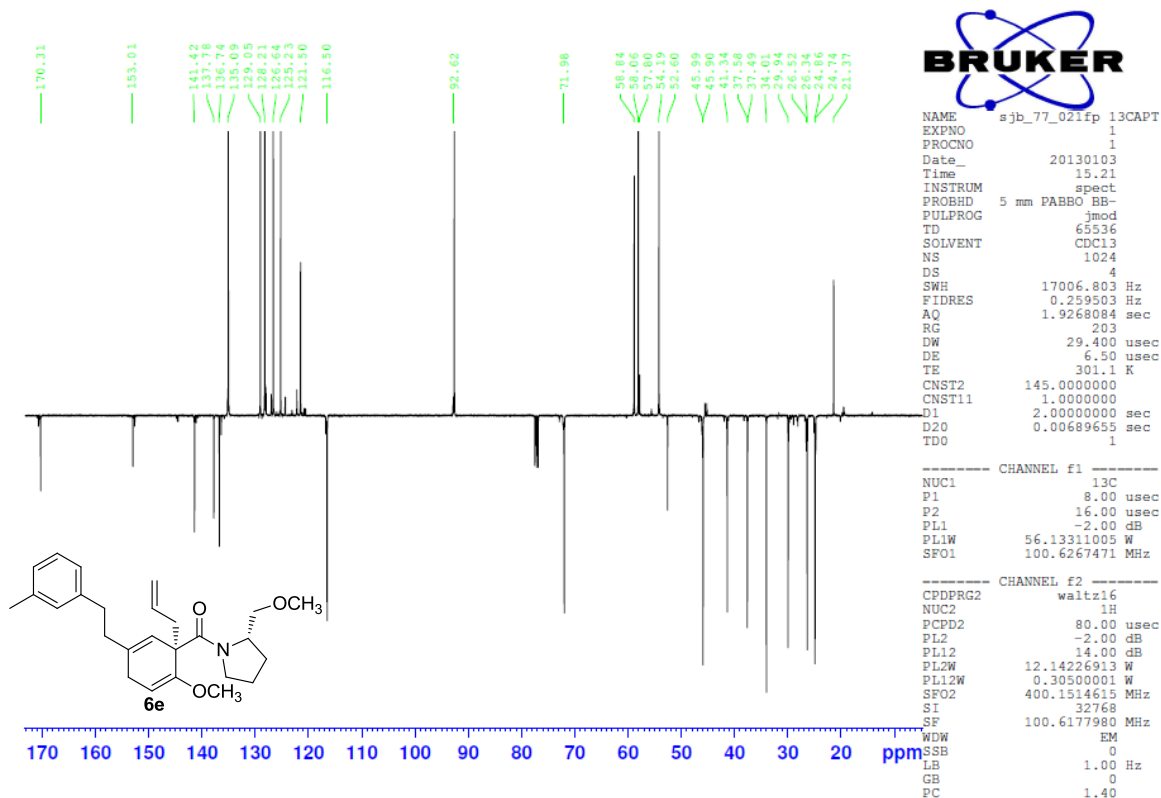

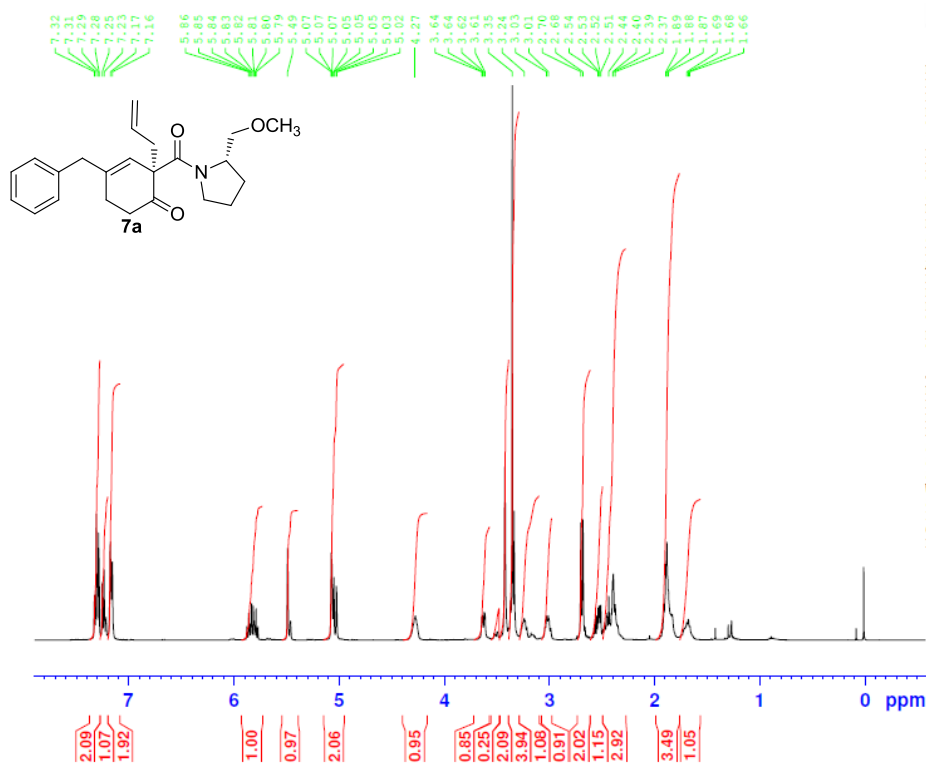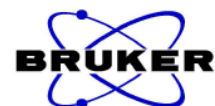

```

NAME      sjb_77_120fp2
EXPNO     1
PROCNO    1
Date_     20130625
Time      9.02
INSTRUM   spect
PROBHD    5 mm PABBO BB-
PULPROG   zg30
TD        65536
SOLVENT   CDCl3
NS         16
DS         2
SWH        8223.685 Hz
FIDRES     0.125483 Hz
AQ         3.9846387 sec
RG         50.8
DW         60.800 usec
DE         6.50 usec
TE         301.2 K
D1         1.00000000 sec
TD0        1

----- CHANNEL f1 -----
NUC1       1H
P1         12.50 usec
PL1        -2.00 dB
PL1W       12.14226913 W
SFO1       400.1524711 MHz
SI         32768
SF         400.1500000 MHz
WDW        EM
SSB        0
LB         0.30 Hz
GB         0
PC         1.00
  
```

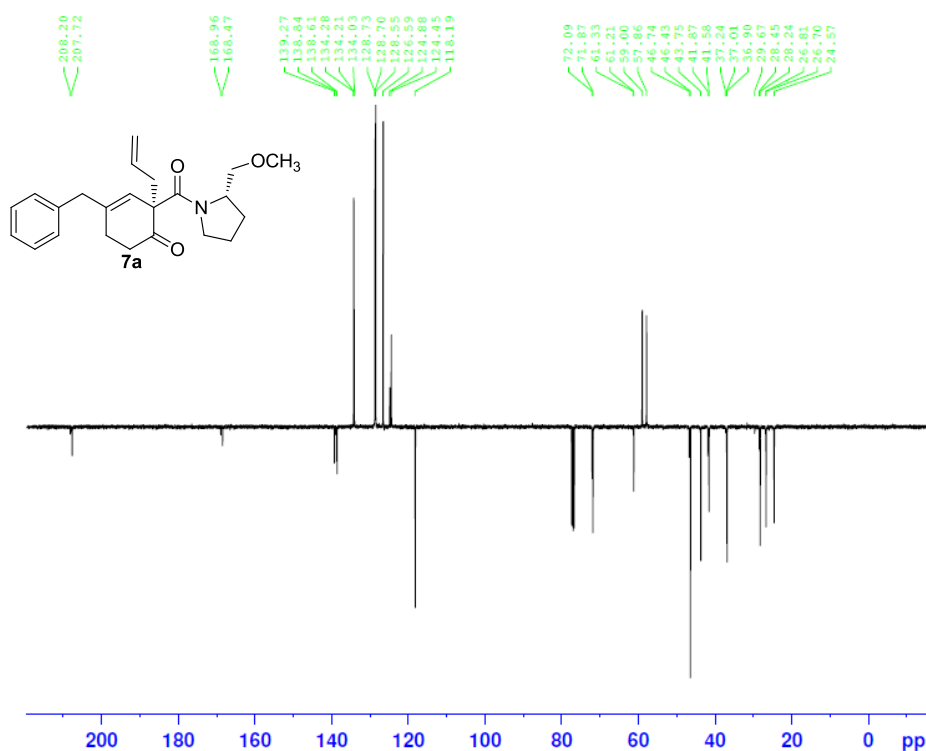

```

Current Data Parameters
NAME      sjb_77_120fp APT
EXPNO     1
PROCNO    1

F2 - Acquisition Parameters
Date_     20130625
Time      8.58
INSTRUM   spect
PROBHD    5 mm PABBO BB-
PULPROG   jmod
TD        65536
SOLVENT   CDCl3
NS         1024
DS         4
SWH        24038.461 Hz
FIDRES     0.366798 Hz
AQ         1.3631488 sec
RG         203
DW         20.800 usec
DE         6.50 usec
TE         301.2 K
CNST2     145.0000000
CNST11    1.0000000
D1         2.00000000 sec
D20        0.00689655 sec
TD0        1

----- CHANNEL f1 -----
NUC1       13C
P1         8.00 usec
P2         16.00 usec
PL1        -2.00 dB
PL1W       56.13311005 W
SFO1       100.6278593 MHz

----- CHANNEL f2 -----
CPDPRG[2] waltz16
NUC2       1H
PCPD2     80.00 usec
PL2        -2.00 dB
PL12       14.00 dB
PL2W       12.14226913 W
PL12W      0.30500001 W
SFO2       400.1515663 MHz

F2 - Processing parameters
SI         32768
SF         100.6177980 MHz
WDW        EM
SSB        0
LB         1.00 Hz
GB         0
PC         1.40
  
```

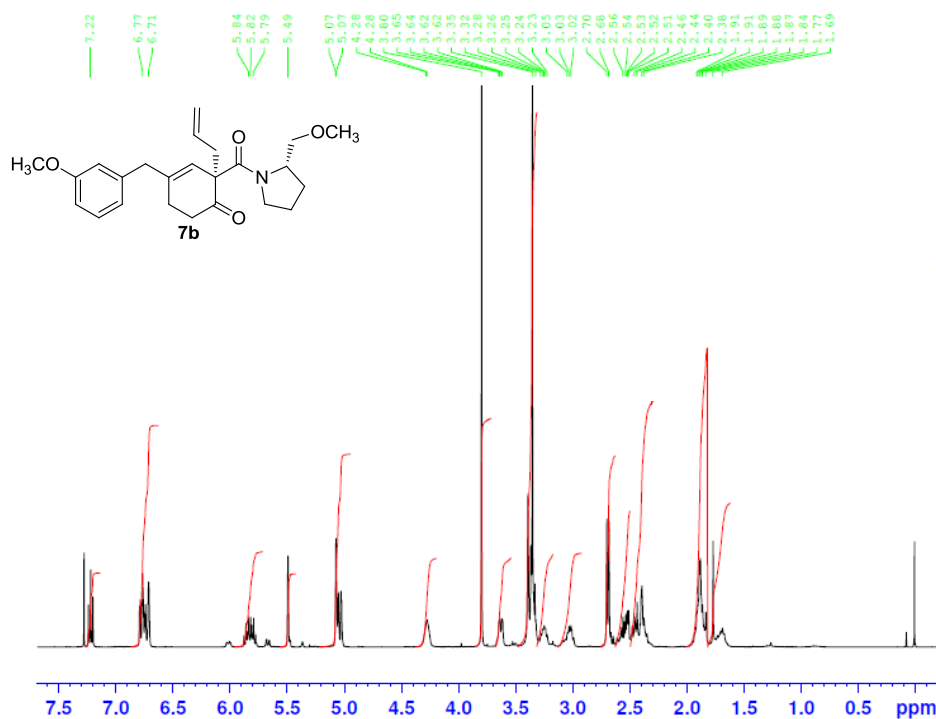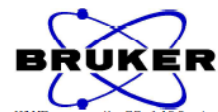

NAME sjb\_77\_145fp take 2  
 EXPNO 1  
 PROCNO 1  
 Date\_ 20130717  
 Time 7.45  
 INSTRUM spect  
 PROBHD 5 mm PABBO BB-  
 PULPROG zg30  
 TD 65536  
 SOLVENT CDCl3  
 NS 16  
 DS 2  
 SWH 8223.685 Hz  
 FIDRES 0.125483 Hz  
 AQ 3.9846387 sec  
 RG 101  
 DW 60.800 usec  
 DE 6.50 usec  
 TE 301.2 K  
 D1 1.00000000 sec  
 TDO 1

----- CHANNEL f1 -----  
 NUC1 1H  
 P1 12.50 usec  
 PL1 -2.00 dB  
 PL1W 12.14226913 W  
 SFO1 400.1524711 MHz  
 SI 32768  
 SF 400.1500000 MHz  
 WDW EM  
 SSB 0  
 LB 0.30 Hz  
 GB 0  
 PC 1.00

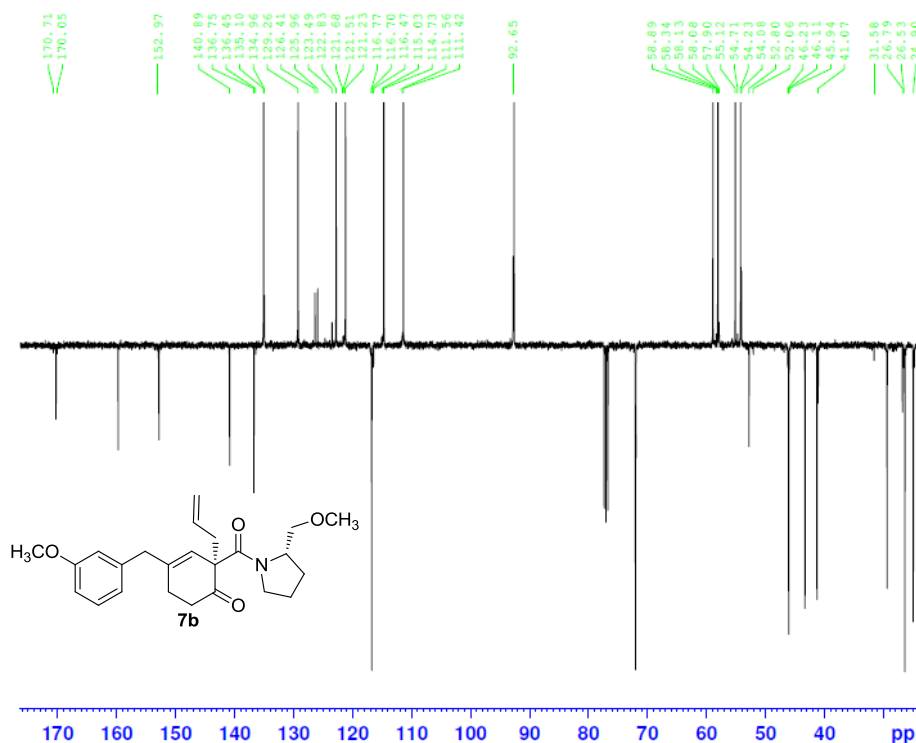

Current Data Parameters  
 NAME sjb\_77\_143fp APT  
 EXPNO 1  
 PROCNO 1

F2 - Acquisition Parameters  
 Date\_ 20130711  
 Time 8.35  
 INSTRUM spect  
 PROBHD 5 mm PABBO BB-  
 PULPROG jmod  
 TD 65536  
 SOLVENT CDCl3  
 NS 922  
 DS 4  
 SWH 24038.461 Hz  
 FIDRES 0.366798 Hz  
 AQ 1.3631488 sec  
 RG 203  
 DW 20.800 usec  
 DE 6.50 usec  
 TE 301.2 K  
 CNST2 145.0000000  
 CNST11 1.0000000  
 D1 2.00000000 sec  
 D20 0.00689655 sec  
 TDO 1

----- CHANNEL f1 -----  
 NUC1 13C  
 P1 8.00 usec  
 P2 16.00 usec  
 PL1 -2.00 dB  
 PL1W 56.13311005 W  
 SFO1 100.6278593 MHz

----- CHANNEL f2 -----  
 CPDPRG[2] waltz16  
 NUC2 1H  
 P2PD2 80.00 usec  
 PL2 -2.00 dB  
 PL12 14.00 dB  
 PL12W 12.14226913 W  
 PL12W 0.30500001 W  
 SFO2 400.1515172 MHz

F2 - Processing parameters  
 SI 32768  
 SF 100.6177980 MHz  
 WDW EM  
 SSB 0  
 LB 1.00 Hz  
 GB 0  
 PC 1.40

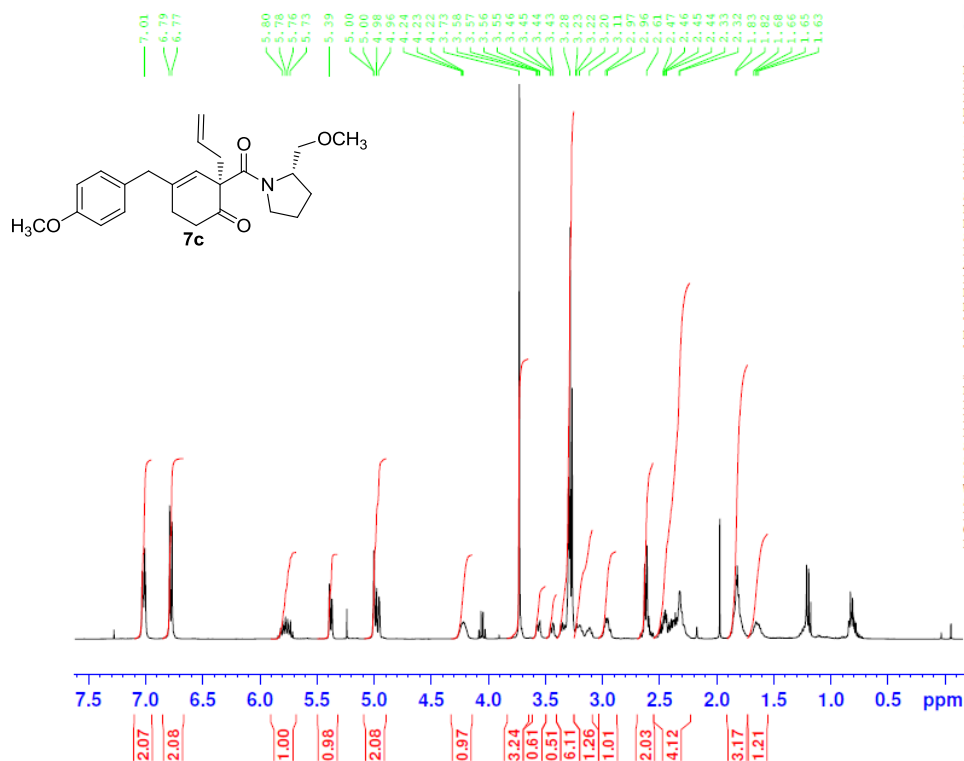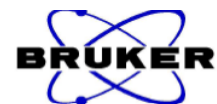

NAME sjb\_74\_013fp  
EXPNO 1  
PROCNO 1  
Date\_ 20120604  
Time 11.45  
INSTRUM spect  
PROBHD 5 mm PABBO BB-  
PULPROG zg30  
TD 65536  
SOLVENT CDCl3  
NS 16  
DS 2  
SWH 8223.685 Hz  
FIDRES 0.125483 Hz  
AQ 3.9846387 sec  
RG 18  
DW 60.800 usec  
DE 6.50 usec  
TE 301.1 K  
D1 1.00000000 sec  
TD0 1

===== CHANNEL f1 =====  
NUC1 1H  
P1 12.50 usec  
PL1 -2.00 dB  
PL1W 12.14226913 W  
SFO1 400.1524711 MHz  
SI 32768  
SF 400.1500000 MHz  
WDW EM  
SSB 0  
LB 0.30 Hz  
GB 0  
PC 1.00

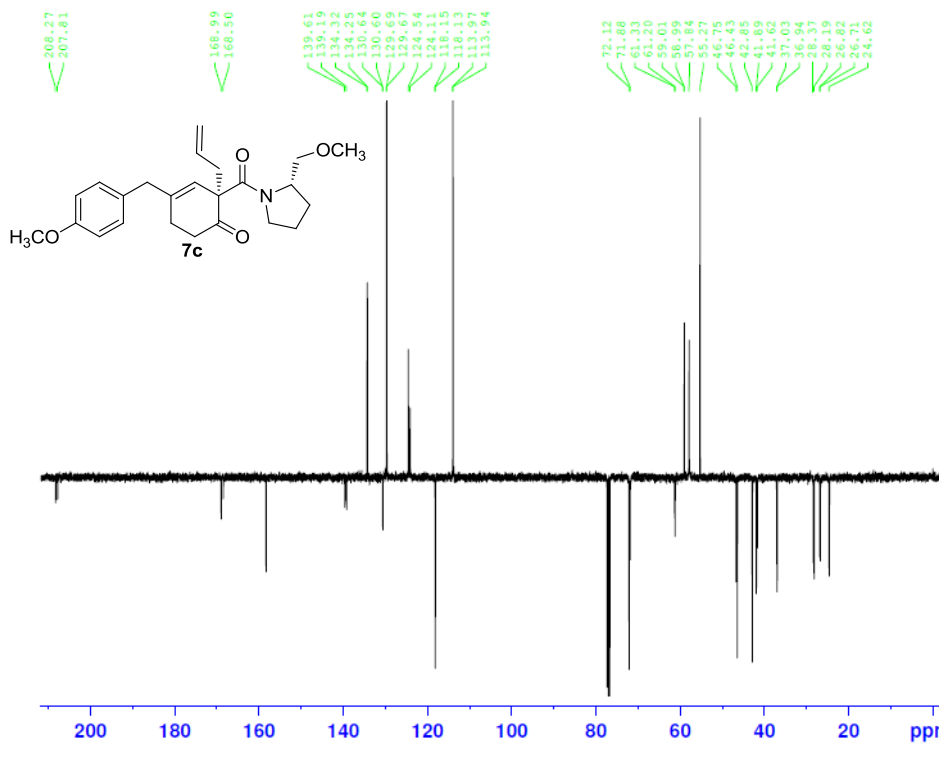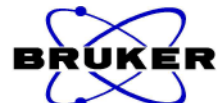

NAME sjb\_77\_003 13CAPT  
EXPNO 1  
PROCNO 1  
Date\_ 20121207  
Time 12.08  
INSTRUM spect  
PROBHD 5 mm PABBO BB-  
PULPROG jmod  
TD 65536  
SOLVENT CDCl3  
NS 1024  
DS 4  
SWH 21739.131 Hz  
FIDRES 0.331713 Hz  
AQ 1.5073780 sec  
RG 203  
DW 23.000 usec  
DE 6.50 usec  
TE 301.2 K  
CNST2 145.0000000  
CNST11 1.0000000  
D1 2.00000000 sec  
D20 0.00689655 sec  
TD0 1

----- CHANNEL f1 -----  
NUC1 13C  
P1 8.00 usec  
P2 16.00 usec  
PL1 -2.00 dB  
PL1W 56.13311005 W  
SFO1 100.6282321 MHz

----- CHANNEL f2 -----  
CPDPRG2 waltz16  
NUC2 1H  
PCPD2 80.00 usec  
PL2 -2.00 dB  
PL12 14.00 dB  
PL2W 12.14226913 W  
PL12W 0.30500000 W  
SFO2 400.1514774 MHz  
SI 32768  
SF 100.6177980 MHz  
WDW EM  
SSB 0  
LB 1.00 Hz  
GB 0  
PC 1.40

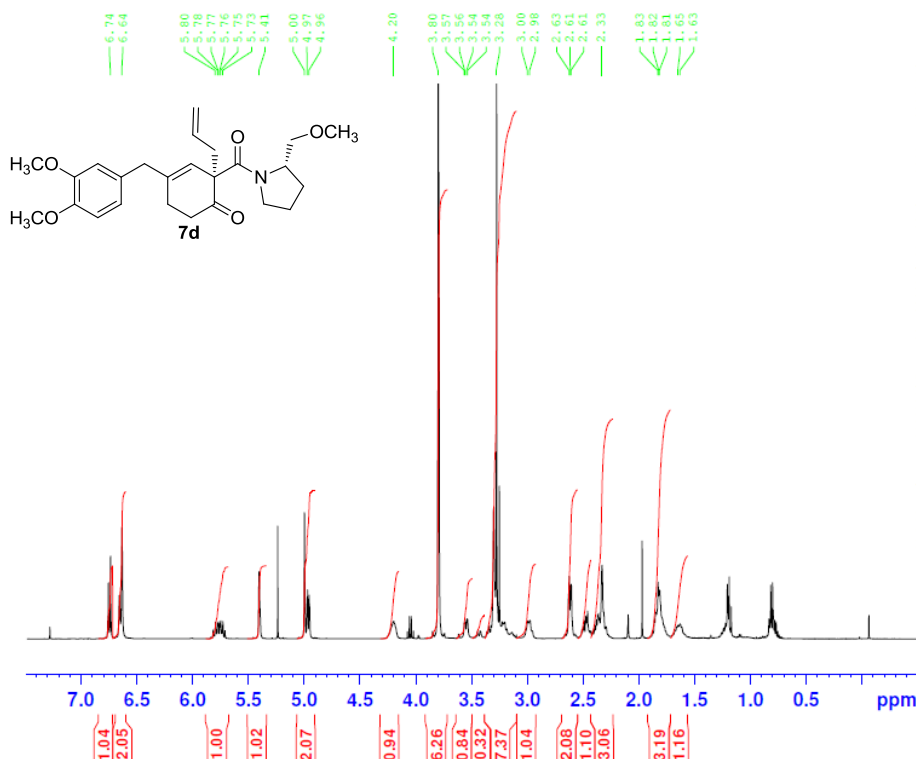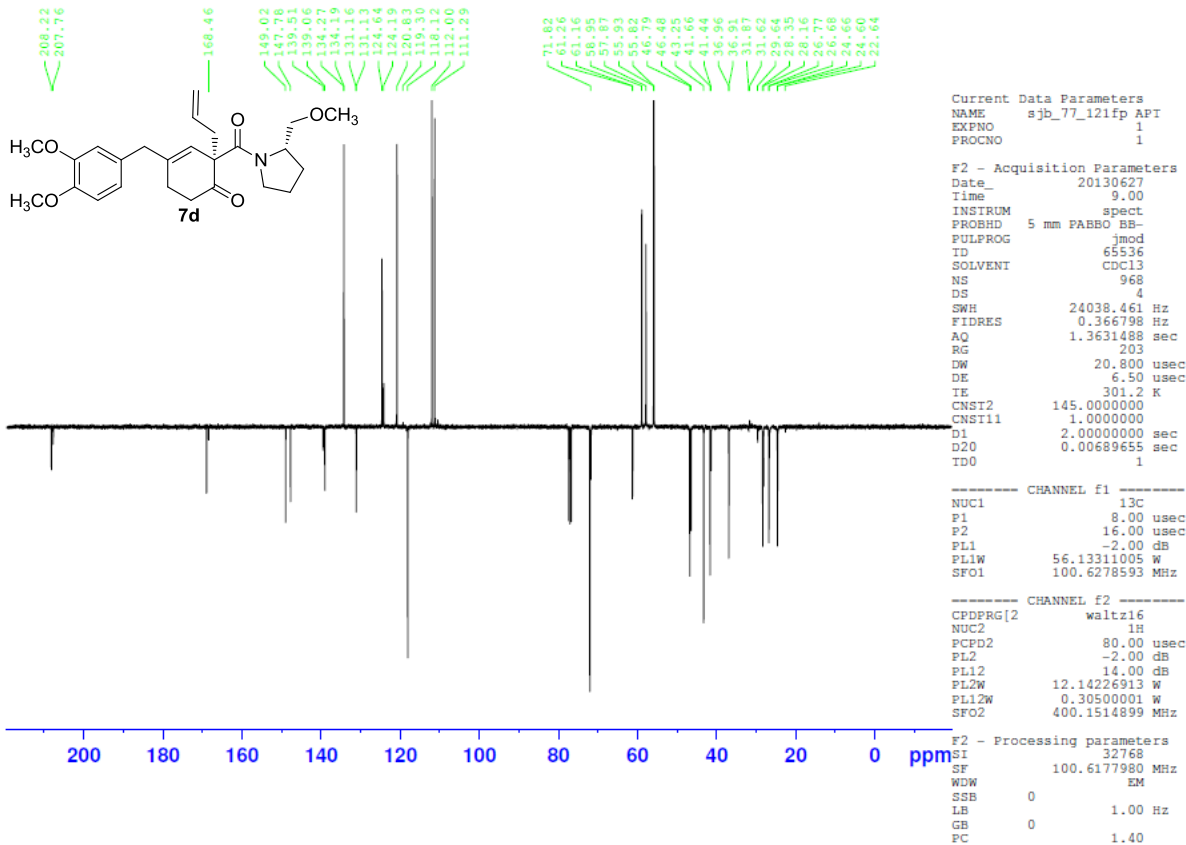

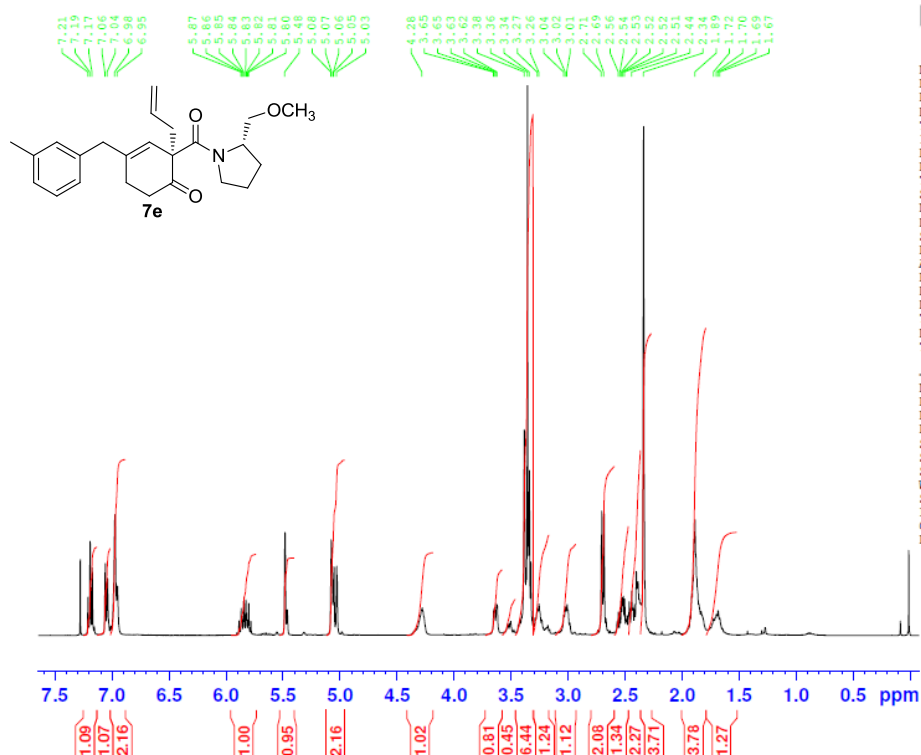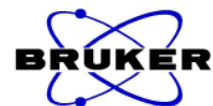

NAME sjb\_77\_144fp2  
 EXPNO 1  
 PROCNO 1  
 Date\_ 20130715  
 Time 7.44  
 INSTRUM spect  
 PROBHD 5 mm PABBO BB-  
 PULPROG zg30  
 TD 65536  
 SOLVENT CDCl3  
 NS 16  
 DS 2  
 SWH 8223.685 Hz  
 FIDRES 0.125483 Hz  
 AQ 3.9846387 sec  
 RG 50.8  
 DW 60.800 usec  
 DE 6.50 usec  
 TE 301.2 K  
 D1 1.00000000 sec  
 TD0 1

----- CHANNEL f1 -----  
 NUC1 1H  
 P1 12.50 usec  
 PL1 -2.00 dB  
 PL1W 12.14226913 W  
 SFO1 400.1524711 MHz  
 SI 32768  
 SF 400.1500000 MHz  
 WDW EM  
 SSB 0  
 LB 0.30 Hz  
 GB 0  
 PC 1.00

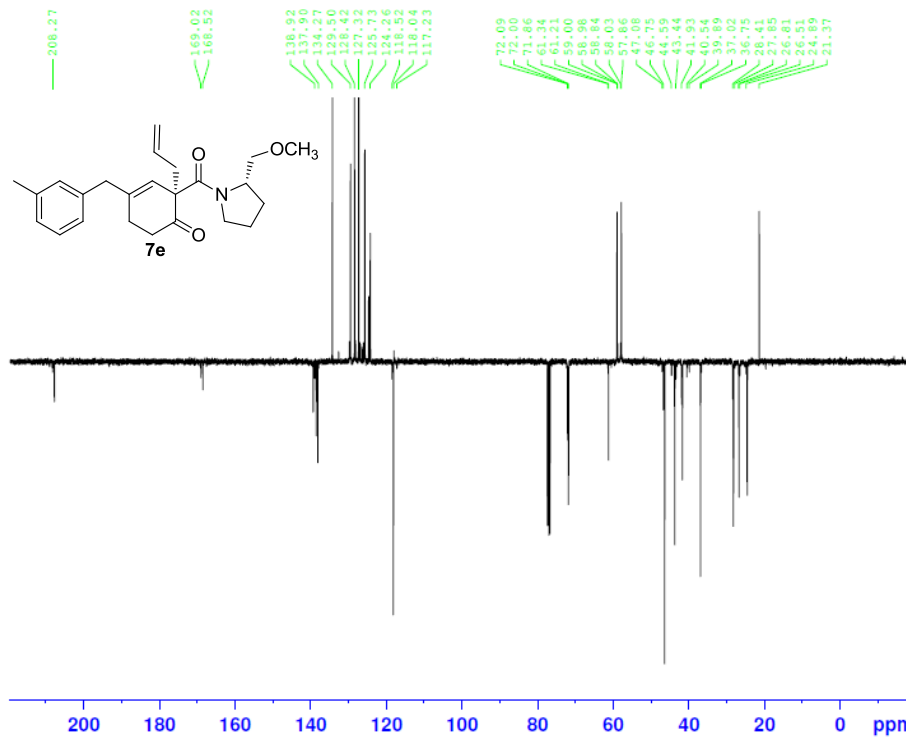

Current Data Parameters  
 NAME sjb\_77\_144fp APT  
 EXPNO 1  
 PROCNO 1

F2 - Acquisition Parameters  
 Date\_ 20130715  
 Time 8.48  
 INSTRUM spect  
 PROBHD 5 mm PABBO BB-  
 PULPROG jmod  
 TD 65536  
 SOLVENT CDCl3  
 NS 1024  
 DS 4  
 SWH 24038.461 Hz  
 FIDRES 0.366798 Hz  
 AQ 1.3631488 sec  
 RG 203  
 DW 20.800 usec  
 DE 6.50 usec  
 TE 301.2 K  
 CNST2 145.0000000  
 CNST11 1.0000000  
 D1 2.00000000 sec  
 D20 0.00689655 sec  
 TD0 1

----- CHANNEL f1 -----  
 NUC1 13C  
 P1 8.00 usec  
 P2 16.00 usec  
 PL1 -2.00 dB  
 PL1W 56.13311005 W  
 SFO1 100.6278593 MHz

----- CHANNEL f2 -----  
 CPDPRG2 waltz16  
 NUC2 1H  
 PCPD2 80.00 usec  
 PL2 -2.00 dB  
 PL12 14.00 dB  
 PL2W 12.14226913 W  
 PL12W 0.30500001 W  
 SFO2 400.1514776 MHz

F2 - Processing parameters  
 SI 32768  
 SF 100.6177980 MHz  
 WDW EM  
 SSB 0  
 LB 1.00 Hz  
 GB 0  
 PC 1.40

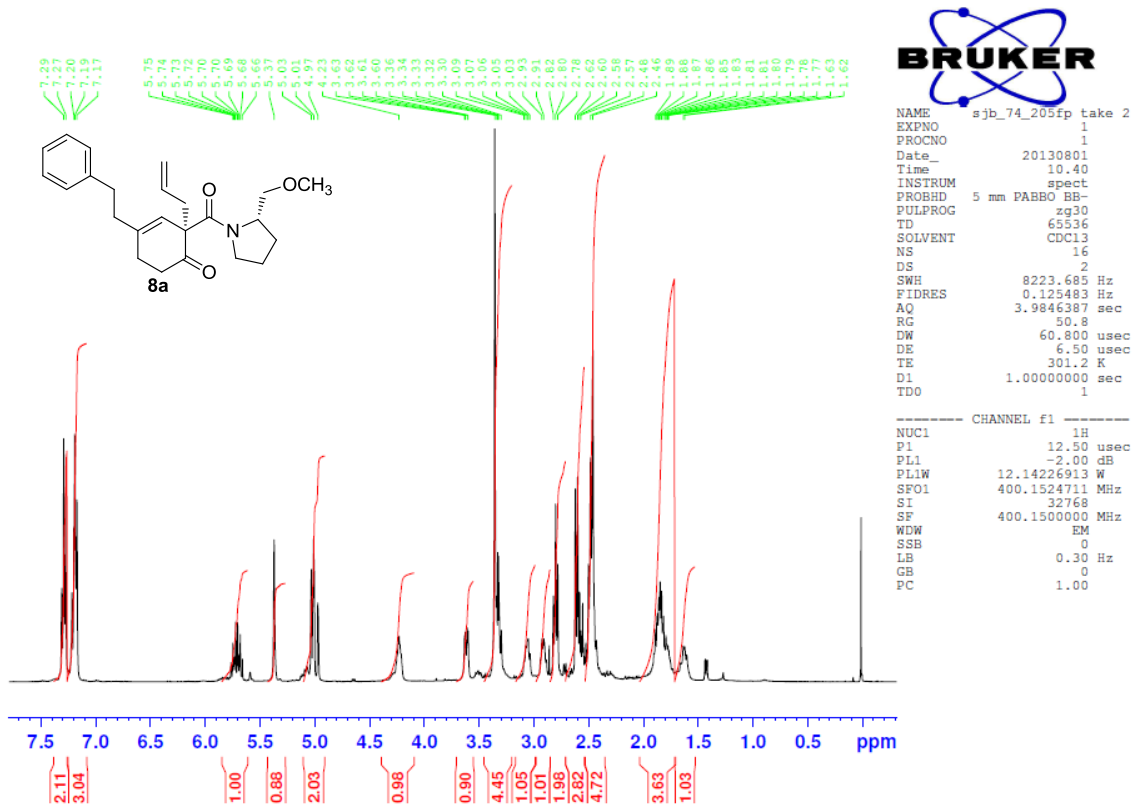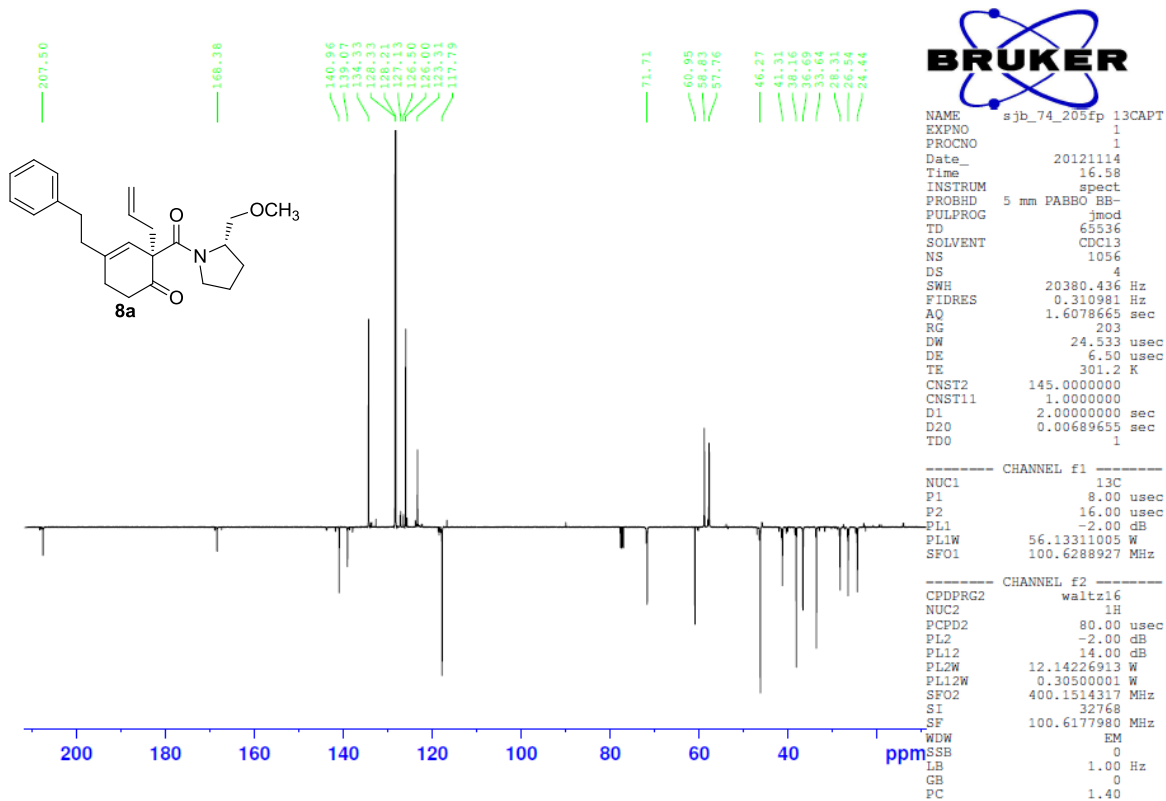

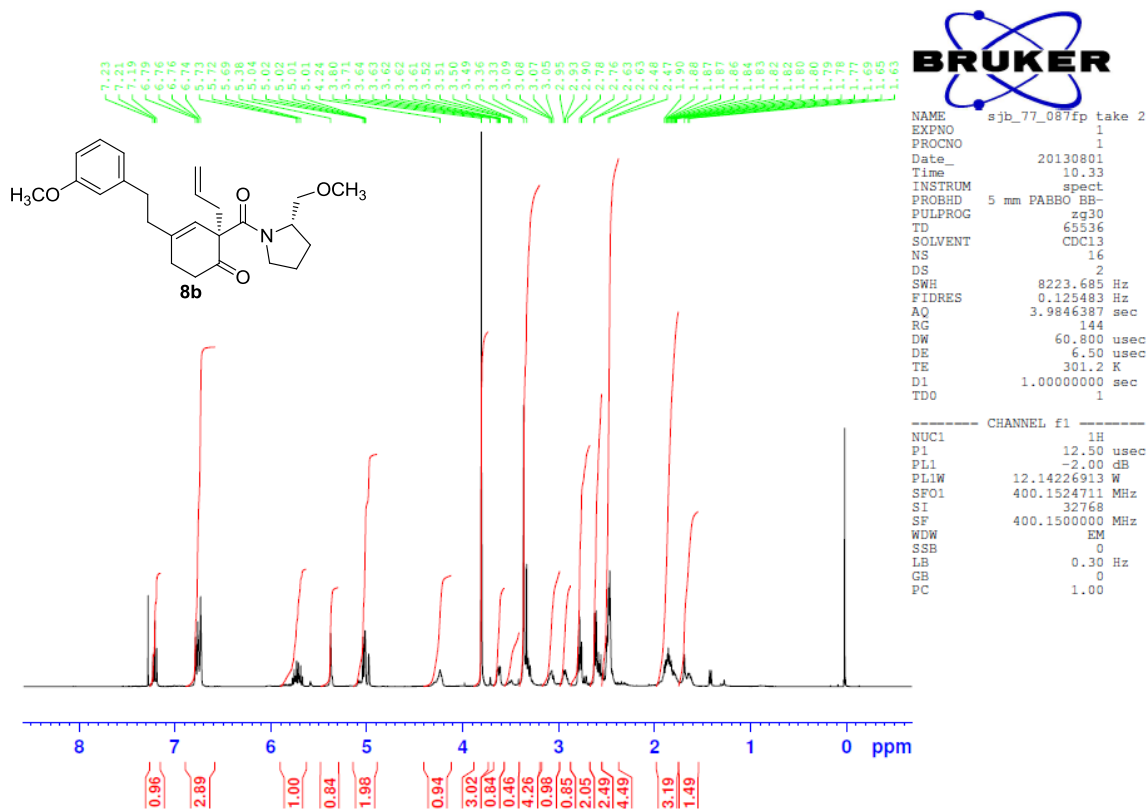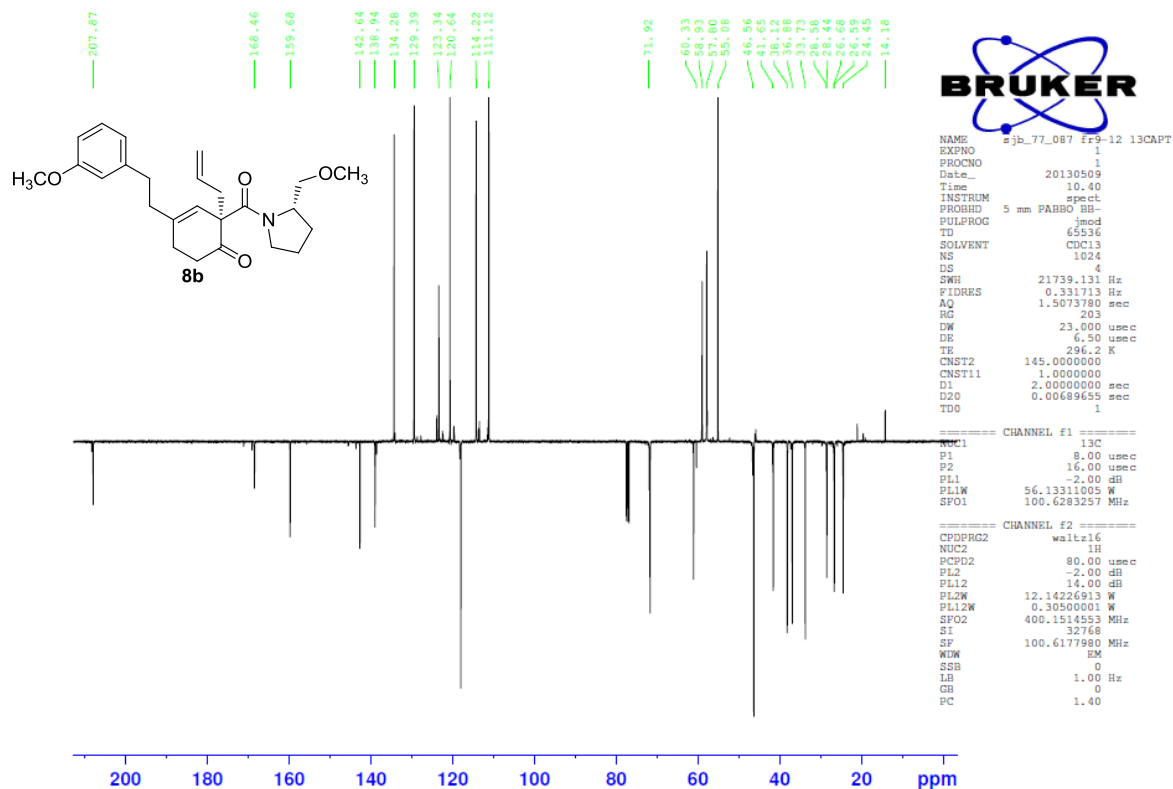

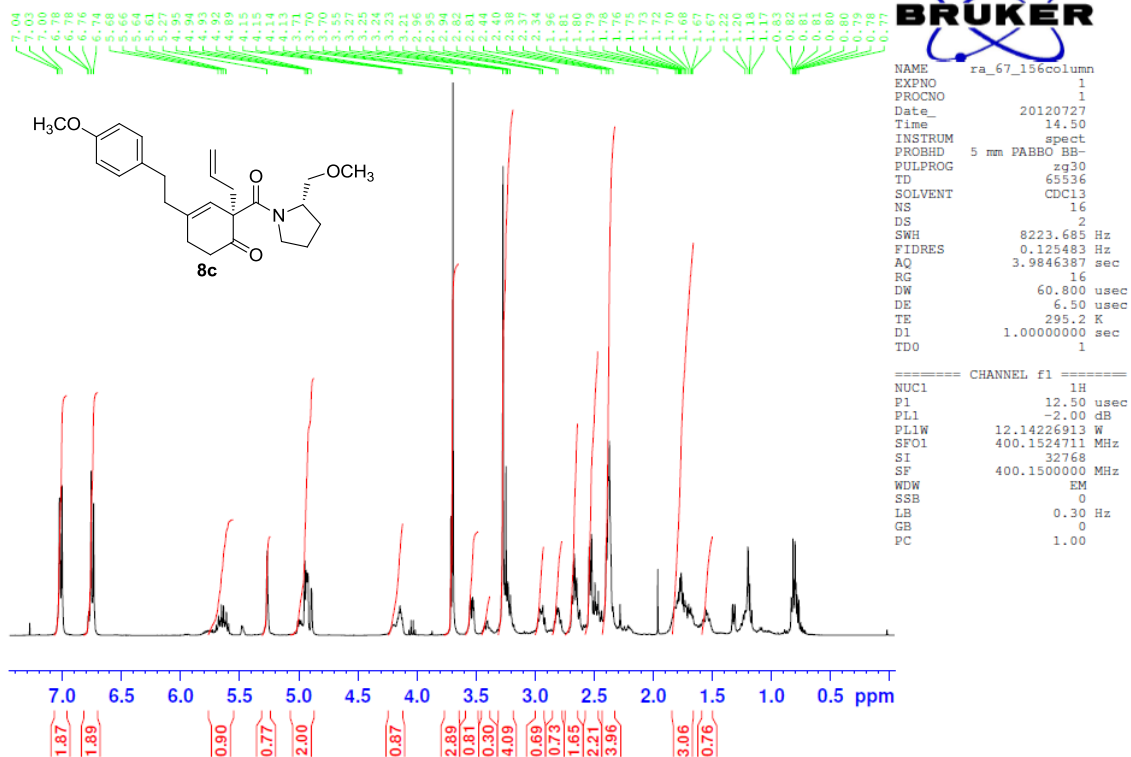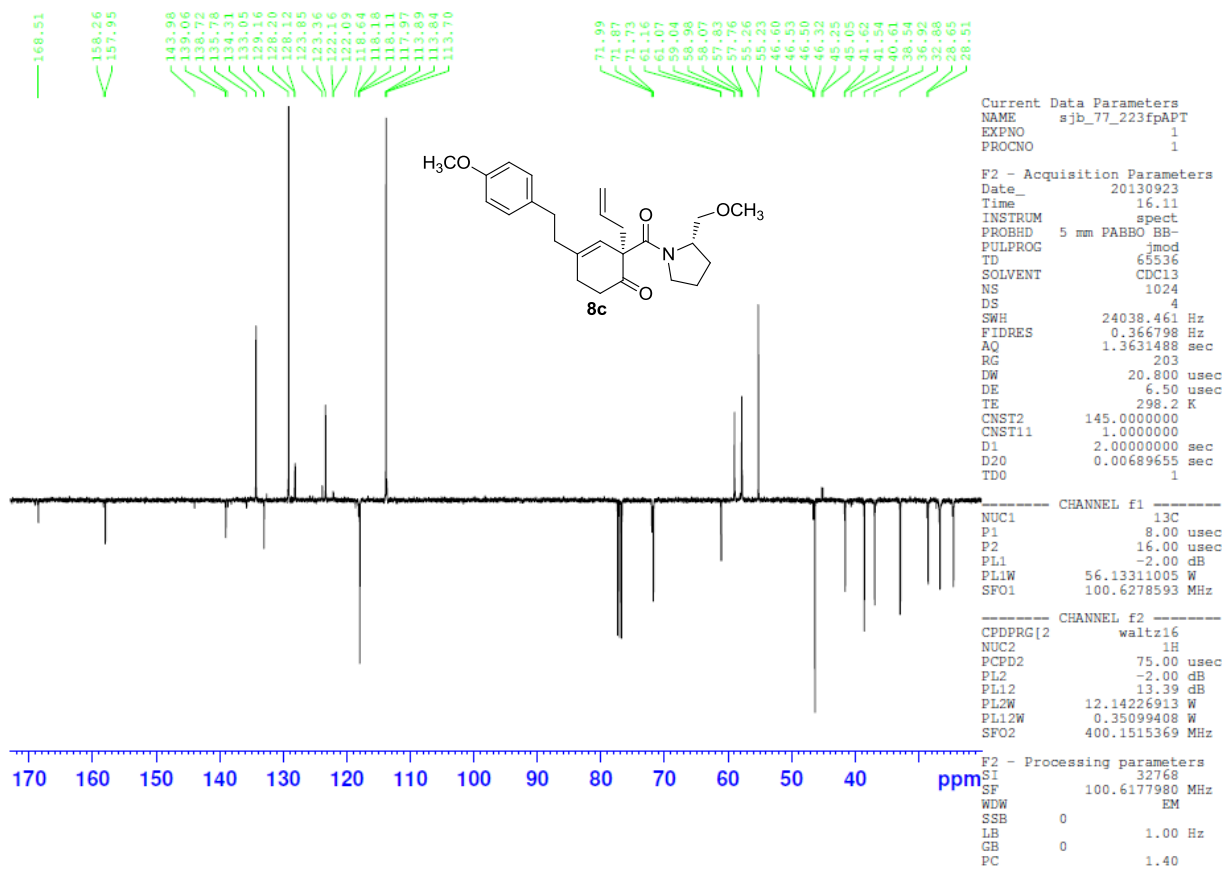

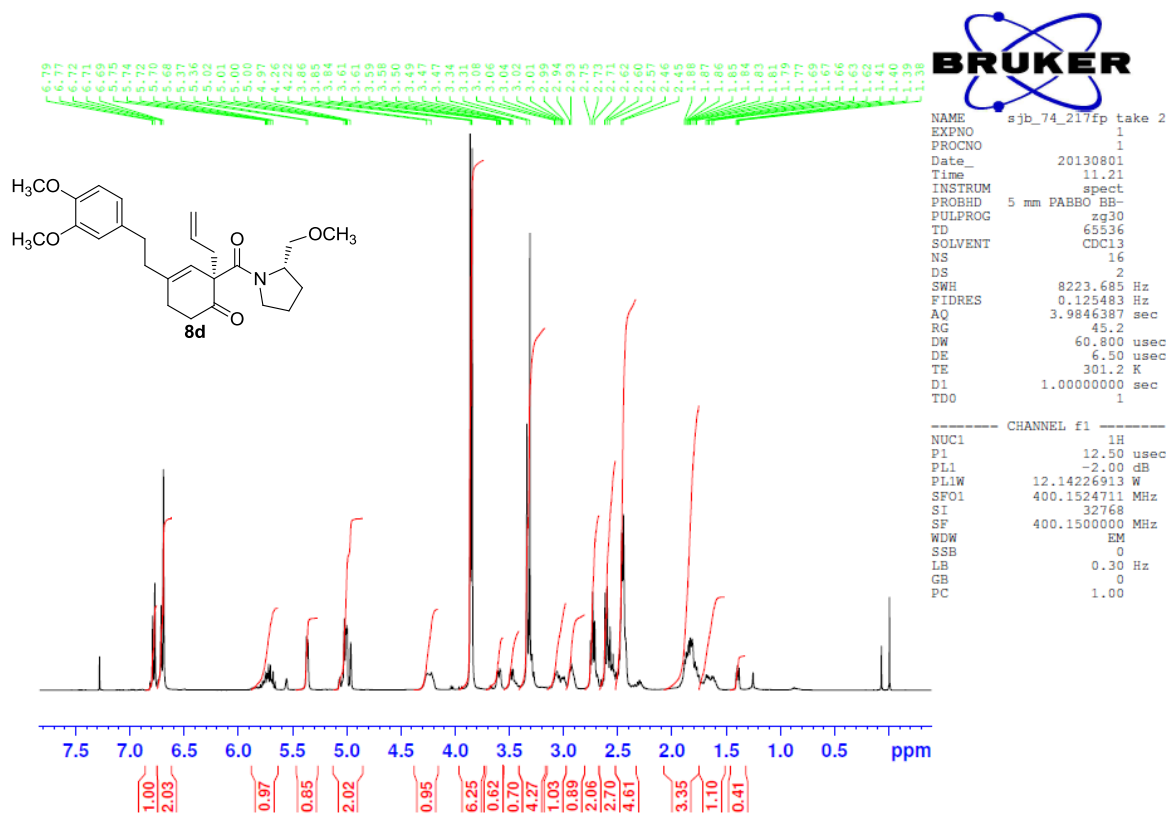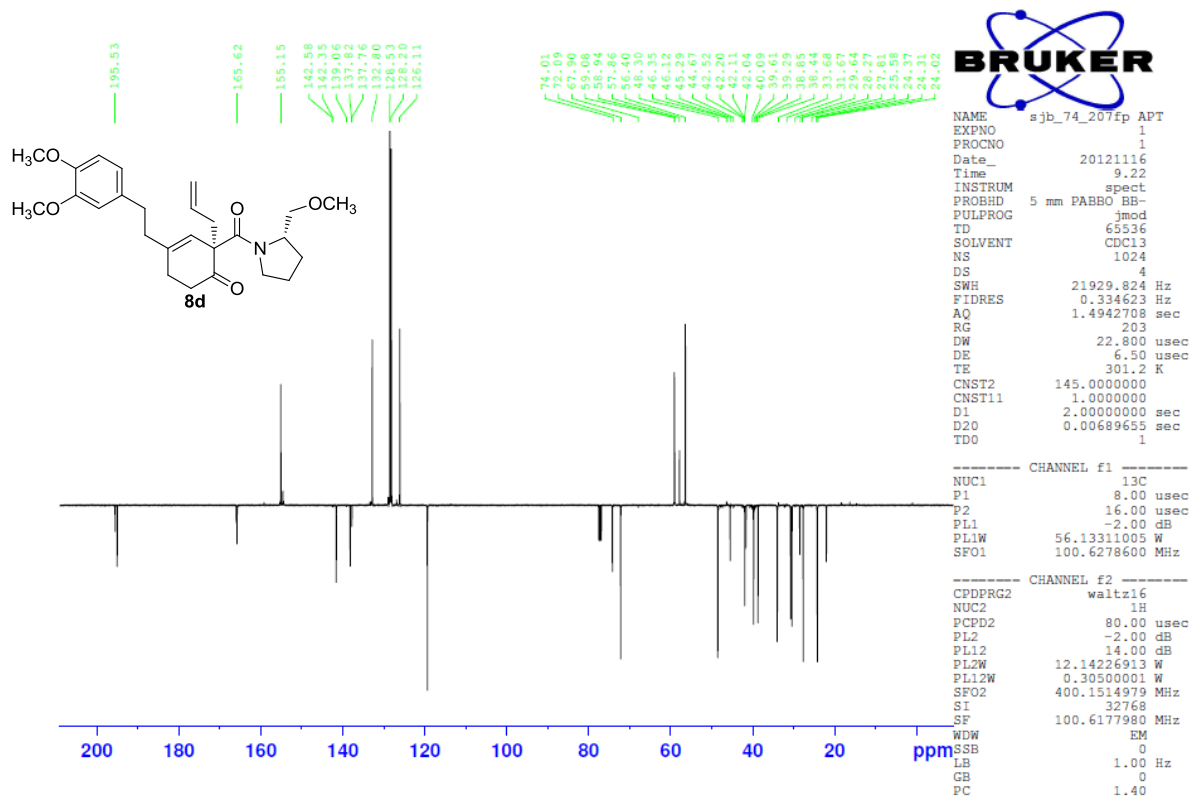

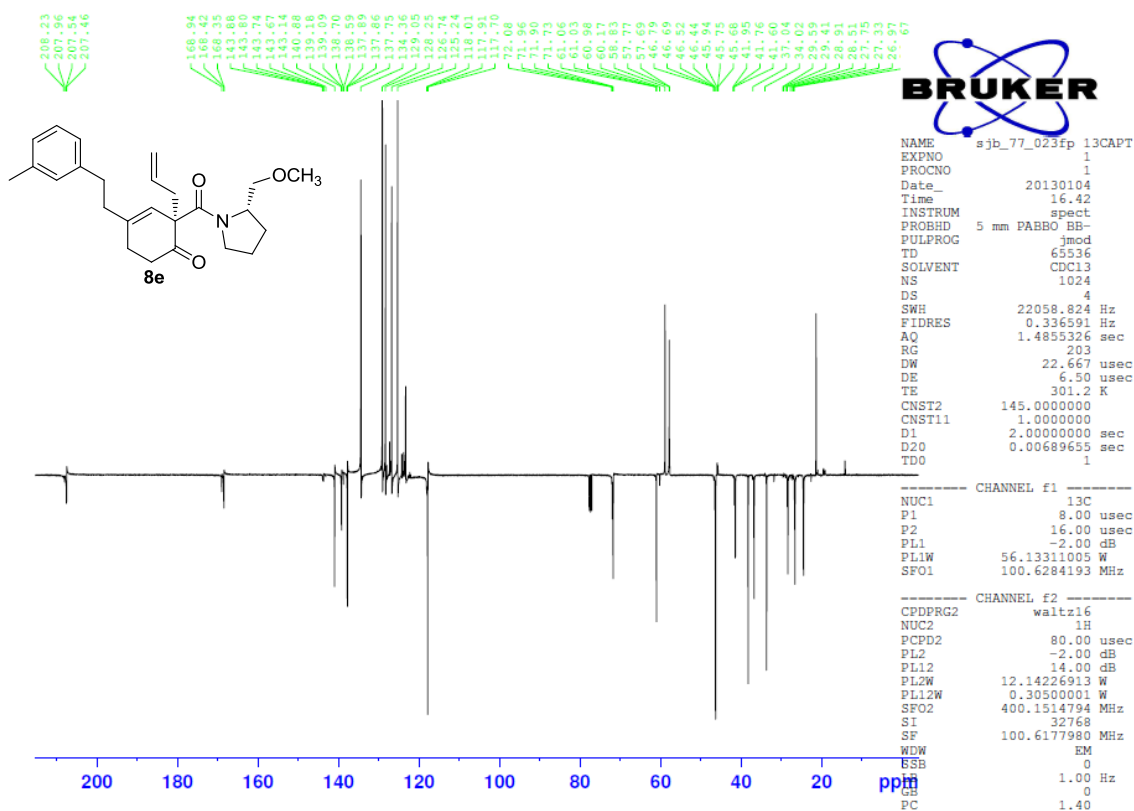

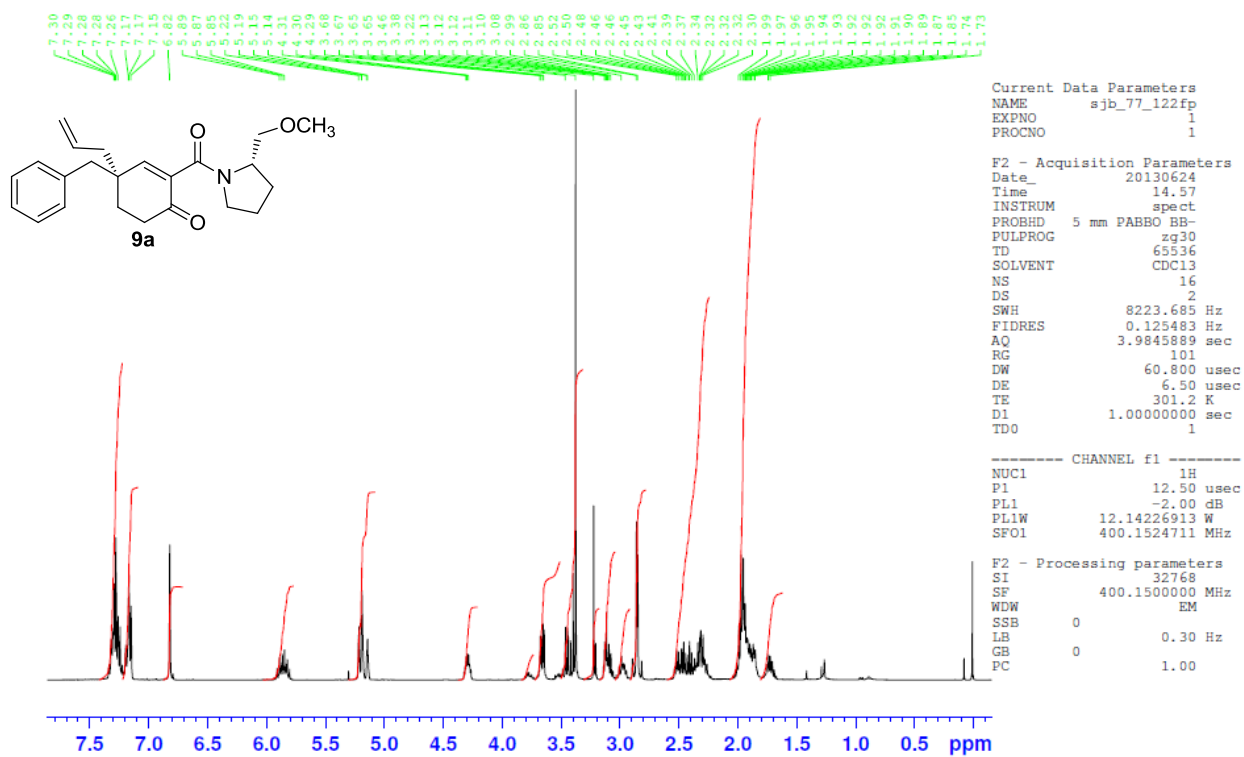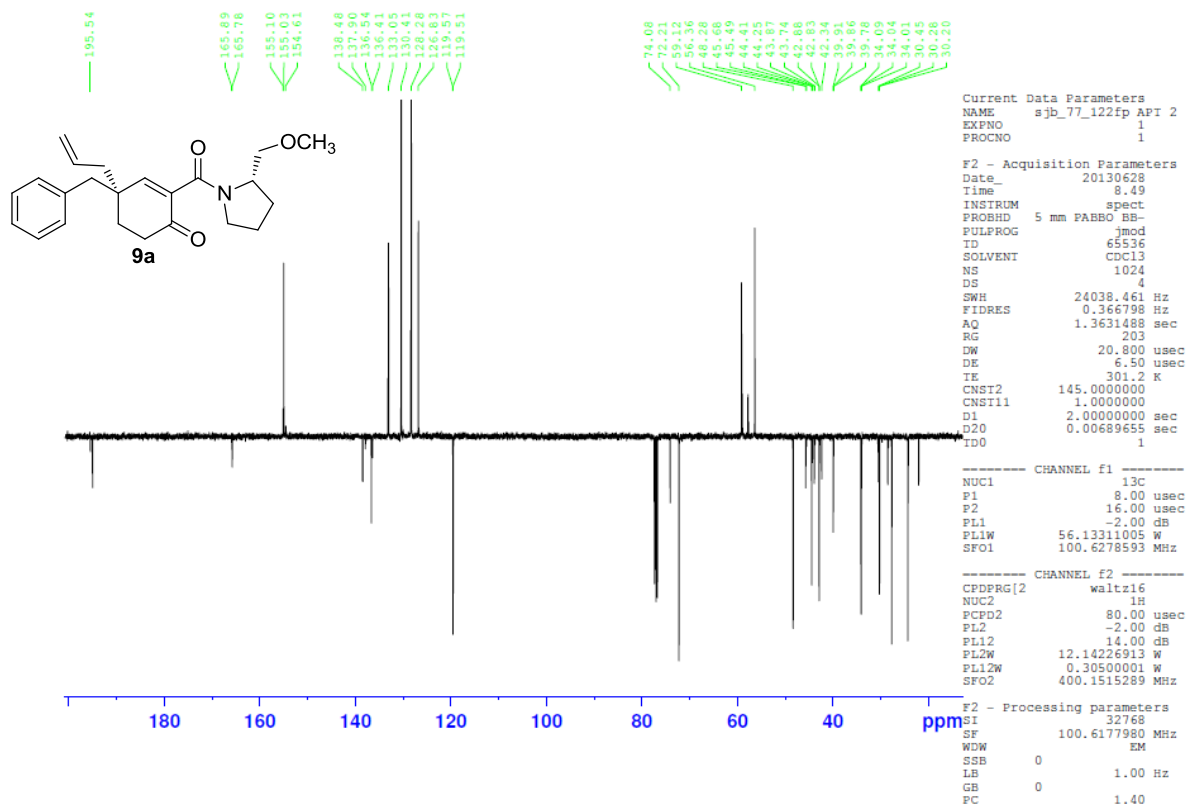

# Area Percent Report

Data Path : C:\msdchem\1\DATA\  
 Data File : sjb\_77\_122fp.D  
 Acq On : 24 Jun 2013 12:57  
 Operator : JMB  
 Sample : sjb\_77\_122fp  
 Misc :  
 ALS Vial : 85 Sample Multiplier: 1

Integration Parameters: autoint1.e  
 Integrator: ChemStation

Method : C:\msdchem\1\5973N\PRECISION.M  
 Title :

Signal : TIC: sjb\_77\_122fp.D\data.ms

| peak<br># | R.T.<br>min | first<br>scan | max<br>scan | last<br>scan | PK<br>TY | peak<br>height | corr.<br>area | corr.<br>% max. | % of<br>total |
|-----------|-------------|---------------|-------------|--------------|----------|----------------|---------------|-----------------|---------------|
| 1         | 11.771      | 1250          | 1257        | 1267         | PV 5     | 23815          | 610660        | 0.06%           | 0.054%        |
| 2         | 12.360      | 1356          | 1360        | 1361         | VV 3     | 14161          | 144431        | 0.01%           | 0.013%        |
| 3         | 12.492      | 1361          | 1383        | 1384         | VV 3     | 45976          | 1701208       | 0.16%           | 0.152%        |
| 4         | 12.629      | 1384          | 1407        | 1408         | VV 3     | 140358         | 7593364       | 0.70%           | 0.677%        |
| 5         | 13.152      | 1408          | 1498        | 1538         | VV       | 19156629       | 1087462192    | 100.00%         | 96.982%       |
| 6         | 13.432      | 1538          | 1547        | 1577         | VV 5     | 422396         | 23796626      | 2.19%           | 2.122%        |

Sum of corrected areas: 1121308482

Abundance

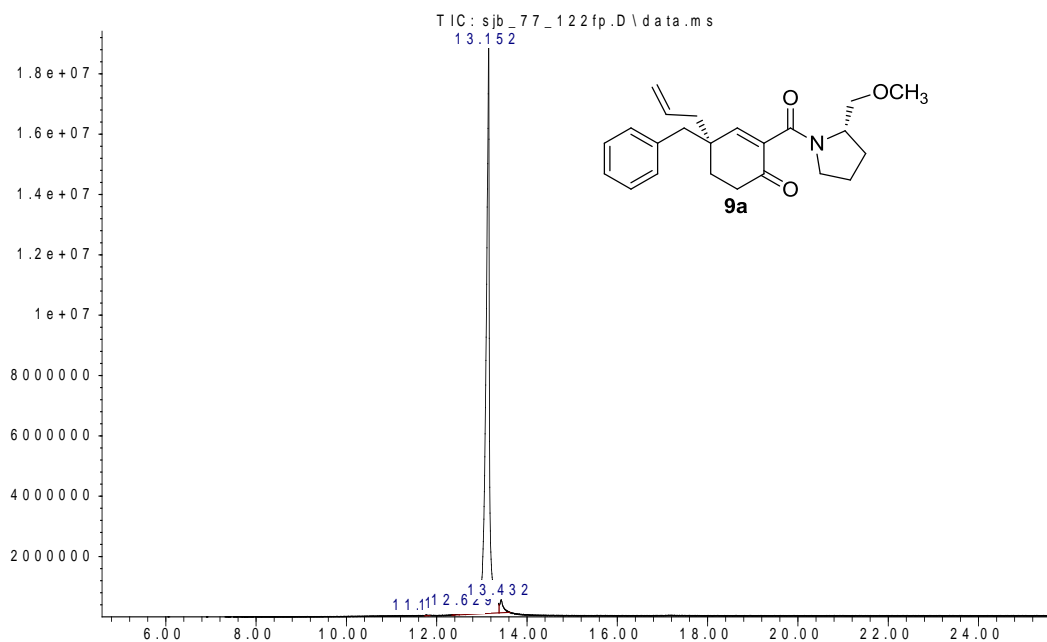

Time-->  
Abundance

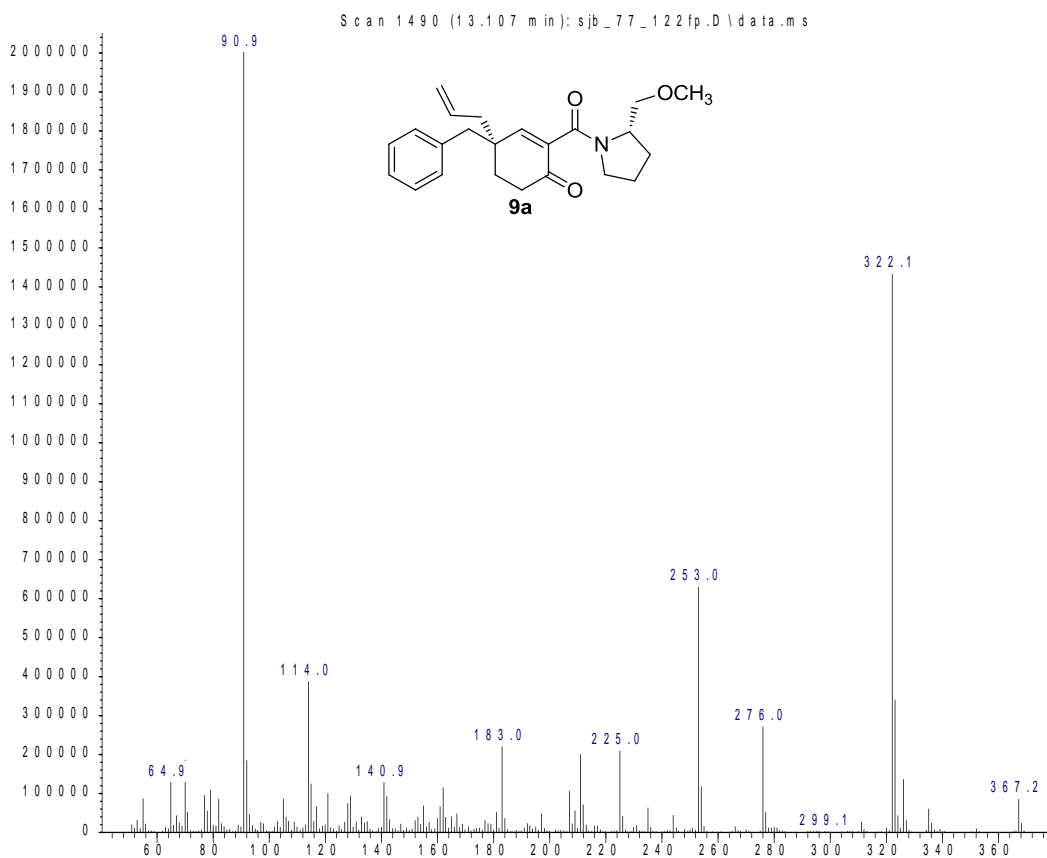

m/z-->

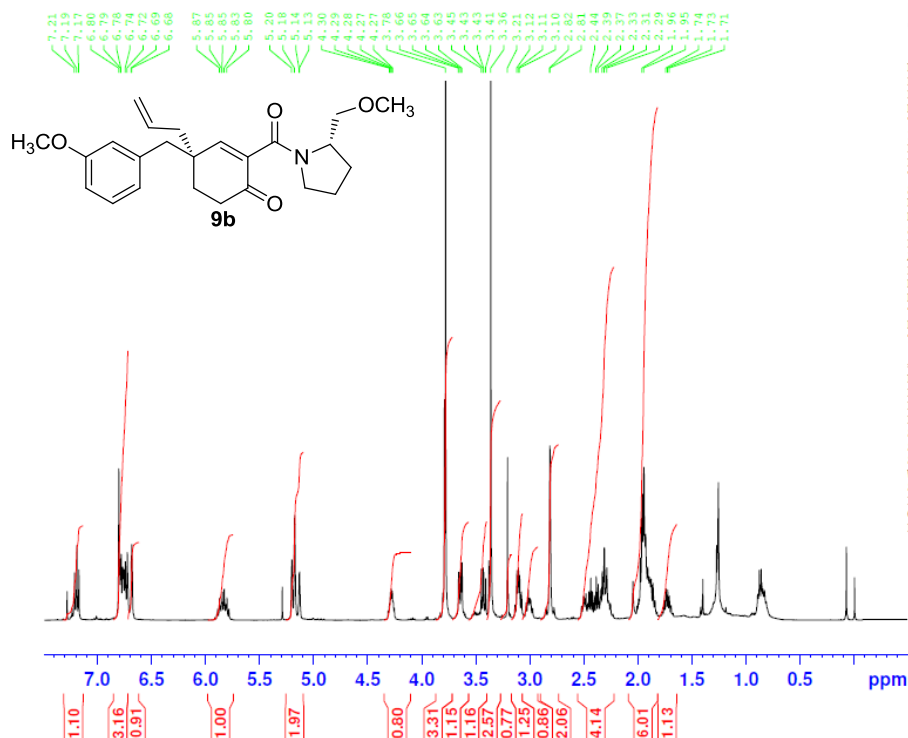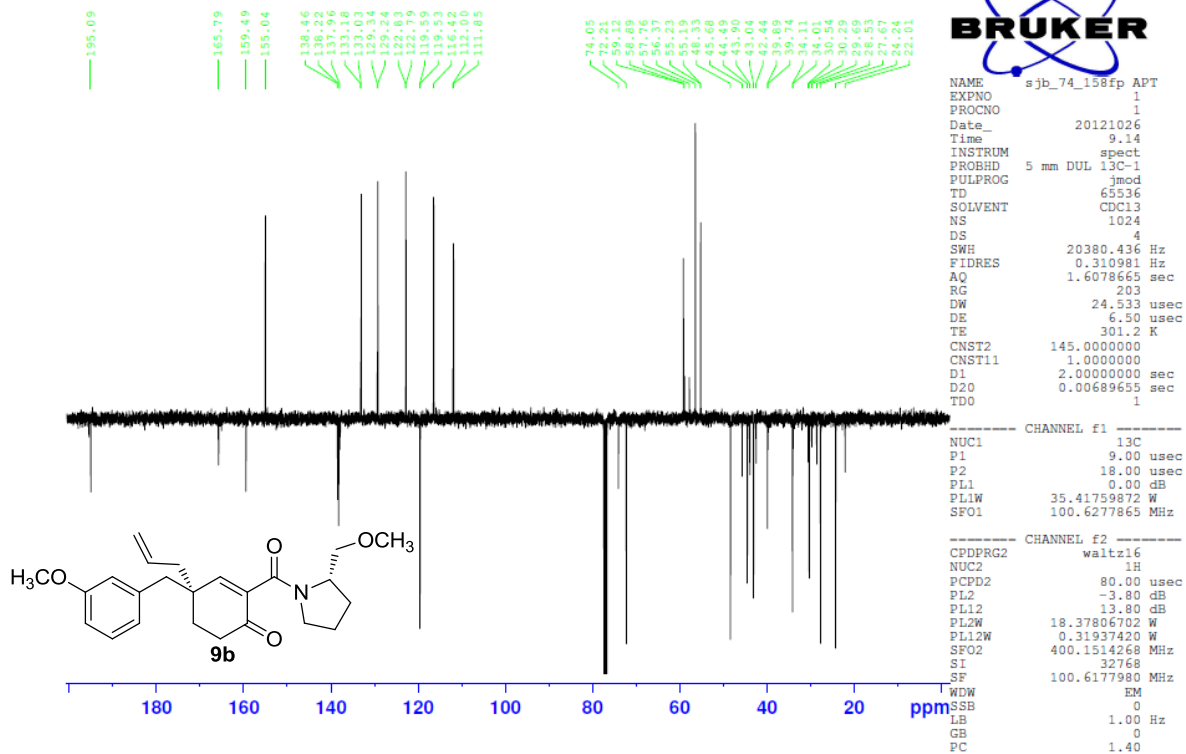

# Area Percent Report

Data Path : C:\msdchem\1\DATA\  
Data File : sjb\_74\_158fp.D  
Acq On : 5 Oct 2012 16:36  
Operator : sjb  
Sample : sjb\_74\_158fp  
Misc :  
ALS Vial : 100 Sample Multiplier: 1

Integration Parameters: autoint1.e  
Integrator: ChemStation

Method : C:\msdchem\1\METHODS\JMB2.m  
Title :

Signal : TIC: sjb\_74\_158fp.D\data.ms

| peak<br># | R.T.<br>min | first<br>scan | max<br>scan | last<br>scan | PK<br>TY | peak<br>height | corr.<br>area | corr.<br>% max. | % of<br>total |
|-----------|-------------|---------------|-------------|--------------|----------|----------------|---------------|-----------------|---------------|
| 1         | 9.261       | 812           | 818         | 847          | BV 3     | 35666          | 858934        | 0.33%           | 0.319%        |
| 2         | 11.374      | 1180          | 1187        | 1198         | BV 2     | 45443          | 646248        | 0.25%           | 0.240%        |
| 3         | 15.307      | 1810          | 1875        | 1896         | VV 2     | 3303222        | 262174800     | 100.00%         | 97.492%       |
| 4         | 15.933      | 1969          | 1984        | 2012         | VV 7     | 115524         | 5238394       | 2.00%           | 1.948%        |

Sum of corrected areas: 268918376

JMB2.m Mon Nov 12 09:53:58 2012

Abundance

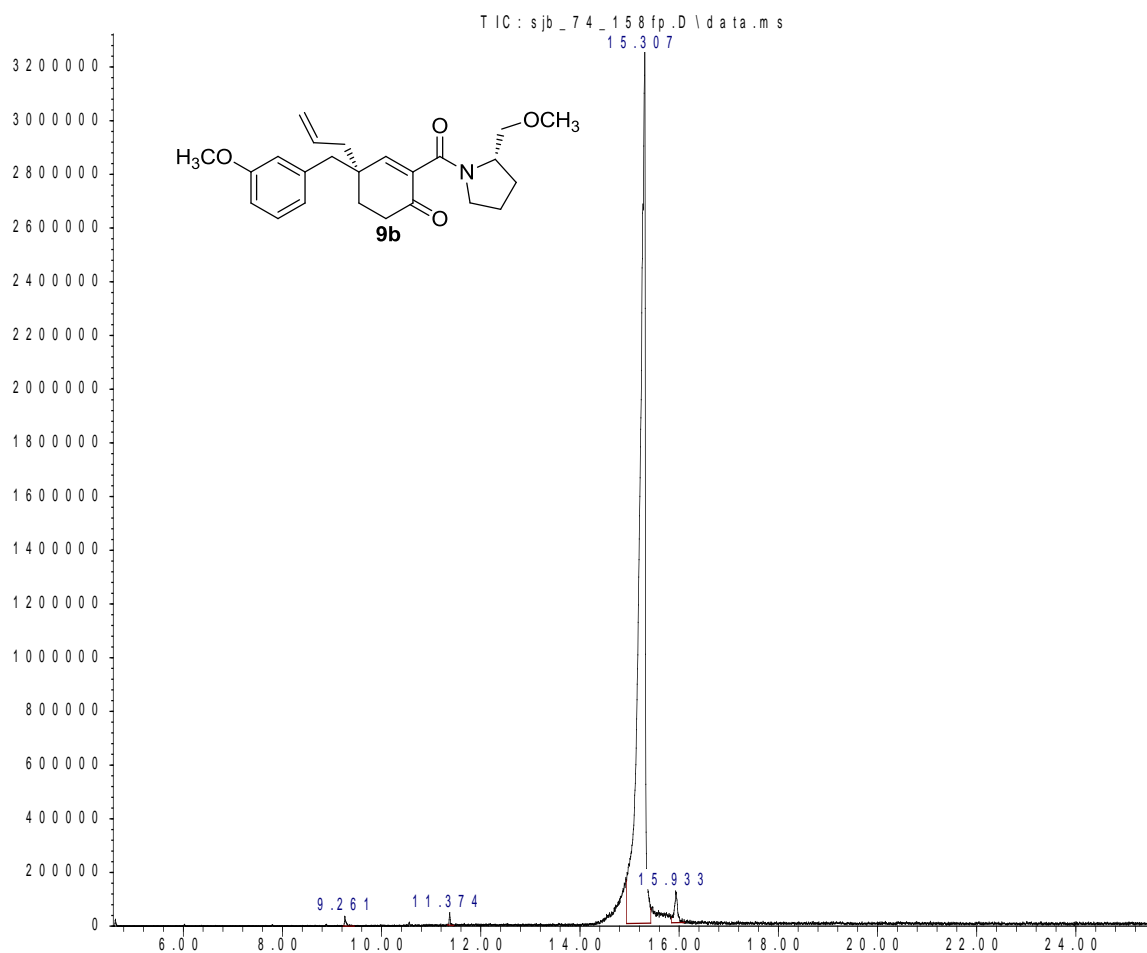

Time-->

Abundance

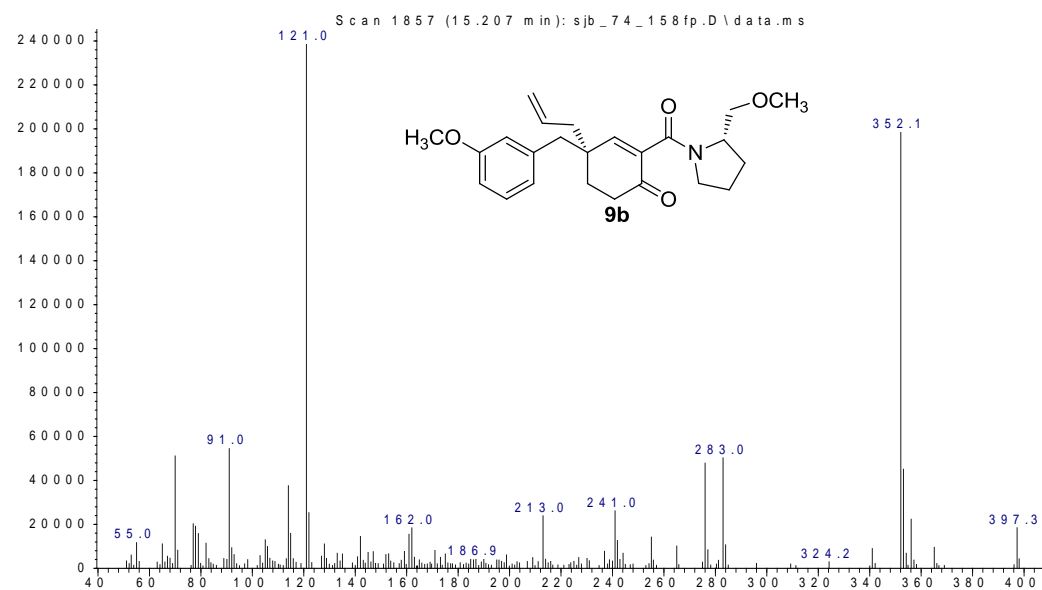

m/z-->



# Area Percent Report

Data Path : C:\msdchem\1\DATA\  
Data File : sjb\_74\_015fp.D  
Acq On : 5 Jun 2012 12:00  
Operator : sjb  
Sample : sjb\_74\_015fp  
Misc :  
ALS Vial : 30 Sample Multiplier: 1

Integration Parameters: autoint1.e  
Integrator: ChemStation

Method : C:\msdchem\1\METHODS\JMB2.m  
Title :

Signal : TIC: sjb\_74\_015fp.D\data.ms

| peak<br># | R.T.<br>min | first<br>scan | max<br>scan | last<br>scan | PK<br>TY | peak<br>height | corr.<br>area | corr.<br>% max. | % of<br>total |
|-----------|-------------|---------------|-------------|--------------|----------|----------------|---------------|-----------------|---------------|
| 1         | 16.008      | 1774          | 1997        | 2062         | BV       | 3280944        | 386191361     | 100.00%         | 96.065%       |
| 2         | 16.422      | 2062          | 2069        | 2081         | VV 8     | 101564         | 5645103       | 1.46%           | 1.404%        |
| 3         | 16.565      | 2081          | 2094        | 2159         | VB 7     | 146121         | 10172724      | 2.63%           | 2.530%        |

Abundance

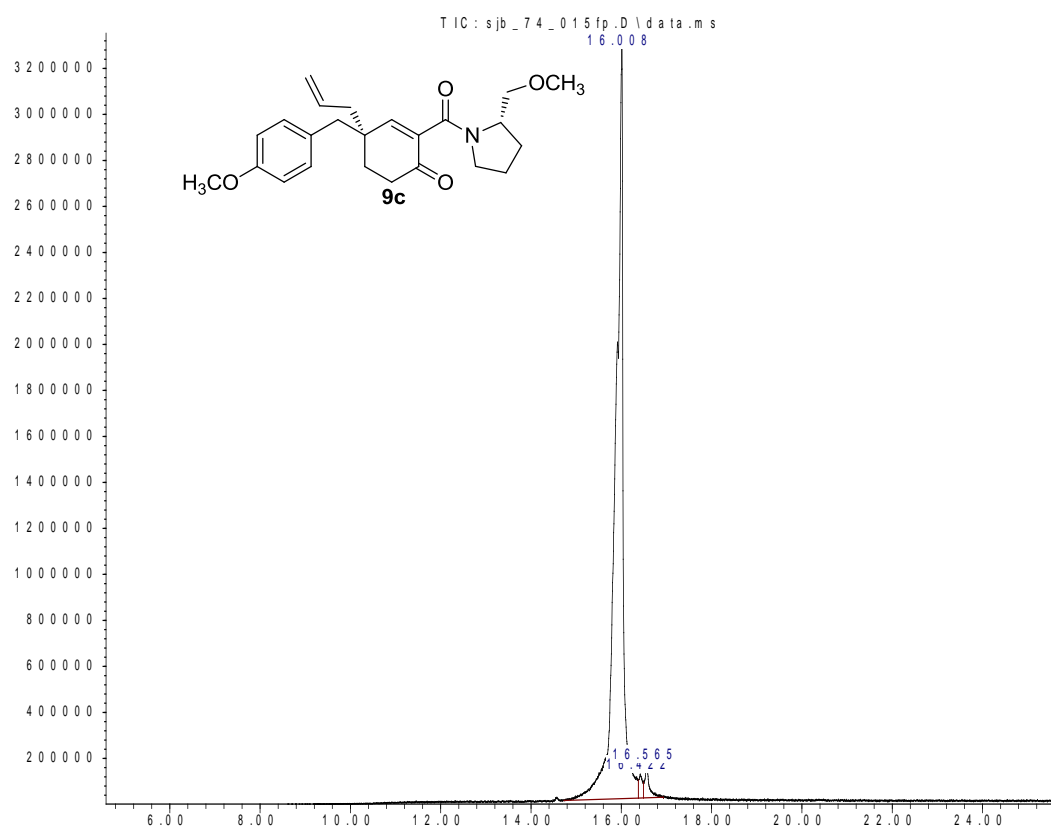

Time-->

Abundance

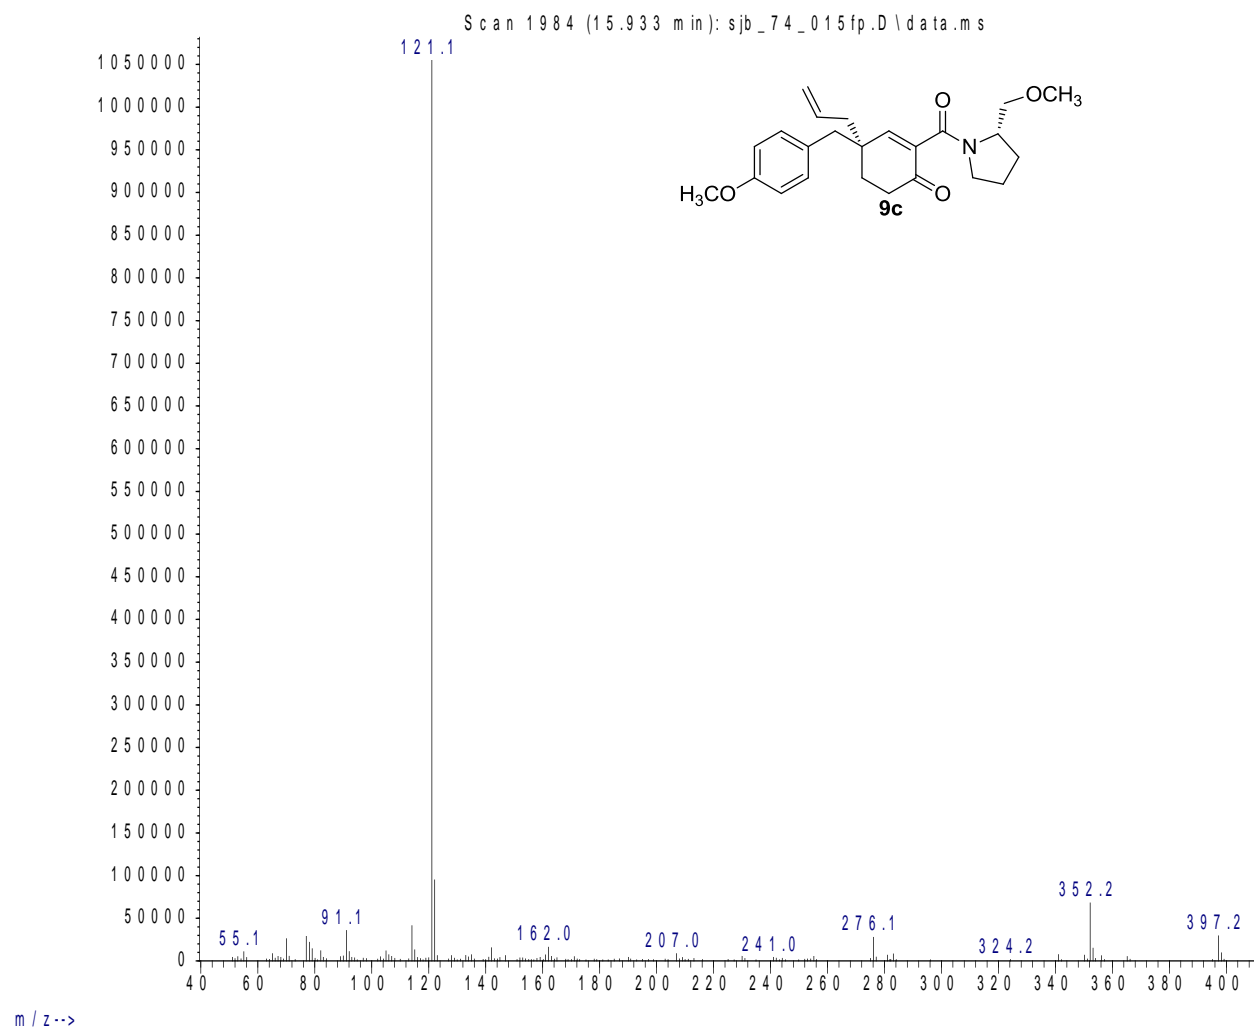



# Area Percent Report

Data Path : C:\msdchem\1\DATA\  
 Data File : sjb\_74\_159fp.D  
 Acq On : 5 Oct 2012 11:58  
 Operator : th  
 Sample : sjb\_74\_159fp  
 Misc :  
 ALS Vial : 15 Sample Multiplier: 1

Integration Parameters: autoint1.e  
 Integrator: ChemStation

Method : C:\msdchem\1\METHODS\JMB2.m  
 Title :

Signal : TIC: sjb\_74\_159fp.D\data.ms

| peak<br># | R.T.<br>min | first<br>scan | max<br>scan | last<br>scan | PK<br>TY | peak<br>height | corr.<br>area | corr.<br>% max. | % of<br>total |
|-----------|-------------|---------------|-------------|--------------|----------|----------------|---------------|-----------------|---------------|
| 1         | 17.904      | 2102          | 2328        | 2412         | VV       | 3198330        | 432129853     | 100.00%         | 96.605%       |
| 2         | 18.426      | 2412          | 2419        | 2438         | VV       | 47849          | 3098396       | 0.72%           | 0.693%        |
| 3         | 18.584      | 2438          | 2447        | 2477         | VV       | 50012          | 4349060       | 1.01%           | 0.972%        |
| 4         | 18.911      | 2477          | 2504        | 2546         | VV       | 88199          | 7737920       | 1.79%           | 1.730%        |

Sum of corrected areas: 447315230

JMB2.m Mon Nov 12 09:56:25 2012

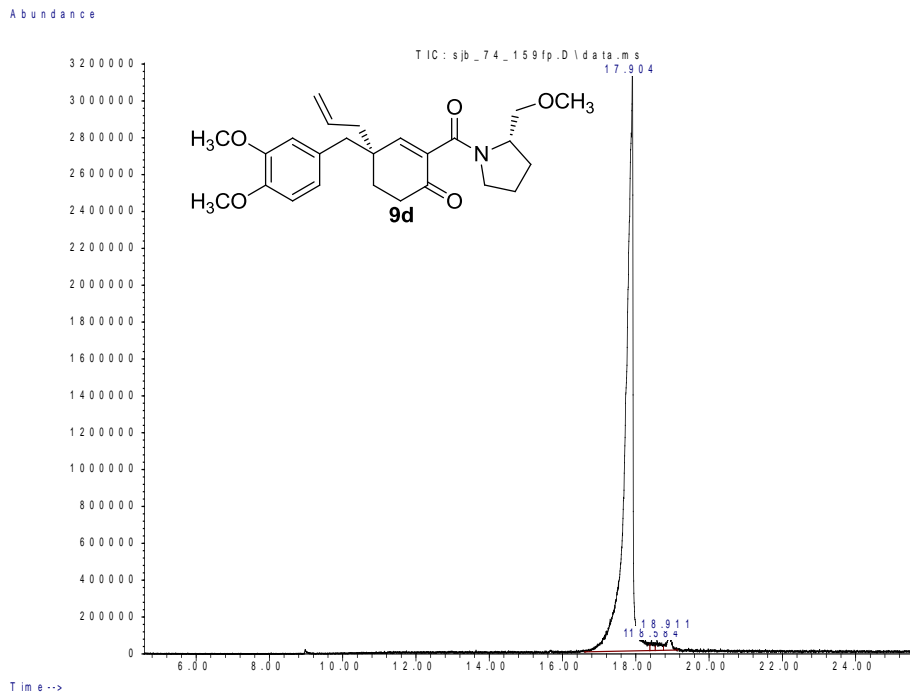

Abundance

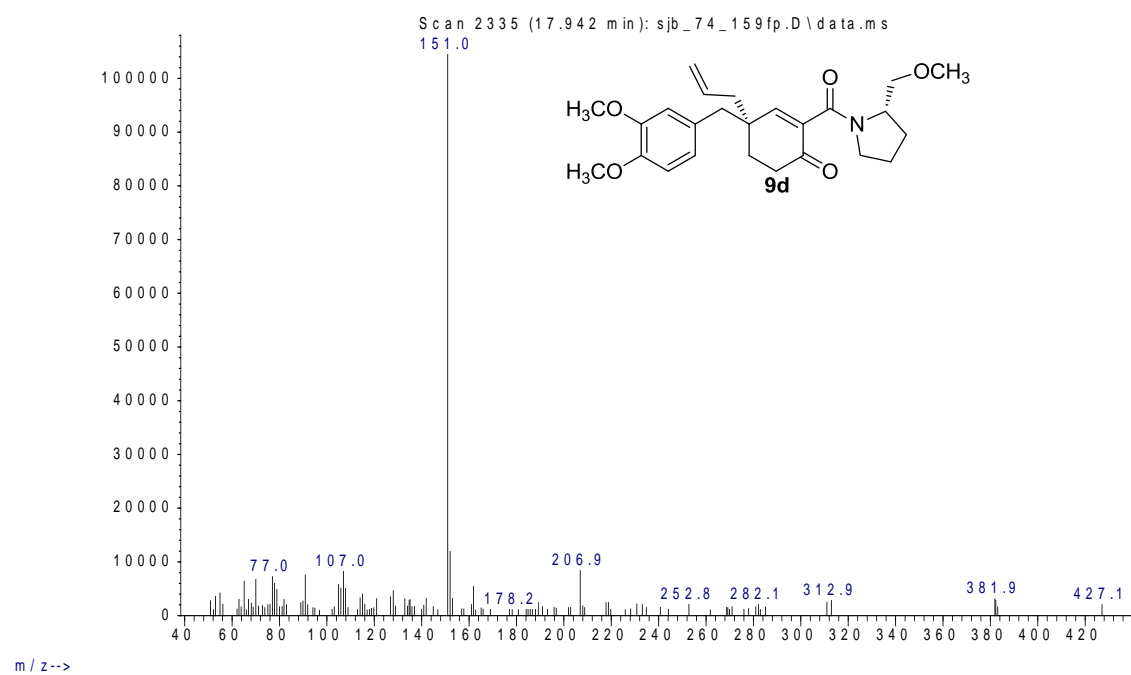

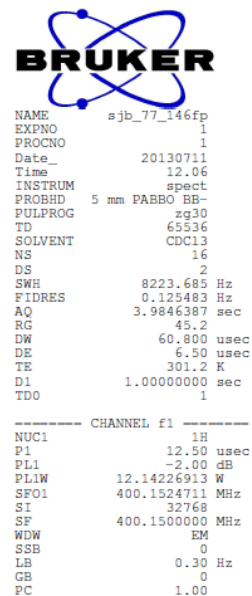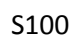

Data Path : C:\msdchem\1\DATA\  
Data File : sjb\_77\_146fp.D  
Acq On : 11 Jul 2013 12:27  
Operator : sjb  
Sample : sjb\_77\_146fp  
Misc :  
ALS Vial : 90 Sample Multiplier: 1

Integration Parameters: autoint1.e  
Integrator: ChemStation

Method : C:\msdchem\1\METHODS\ckr3.m  
Title :

Signal : TIC: sjb\_77\_146fp.D\data.ms

| peak<br>#               | R.T.<br>min | first<br>scan | max<br>scan | last<br>scan | PK<br>TY | peak<br>height | corr.<br>area            | corr.<br>% max. | % of<br>total |
|-------------------------|-------------|---------------|-------------|--------------|----------|----------------|--------------------------|-----------------|---------------|
| 1                       | 12.936      | 1458          | 1460        | 1472         | VV 7     | 10298          | 425396                   | 0.53%           | 0.517%        |
| 2                       | 13.053      | 1472          | 1481        | 1482         | VV 7     | 13961          | 373159                   | 0.47%           | 0.453%        |
| 3                       | 13.076      | 1482          | 1485        | 1487         | VV 4     | 15082          | 220310                   | 0.28%           | 0.268%        |
| 4                       | 13.506      | 1487          | 1560        | 1603         | VV 2     | 1898200        | 79627101                 | 100.00%         | 96.706%       |
| 5                       | 13.762      | 1603          | 1604        | 1613         | VV 8     | 19689          | 462440                   | 0.58%           | 0.562%        |
| 6                       | 13.823      | 1613          | 1615        | 1623         | VV 4     | 16918          | 402255                   | 0.51%           | 0.489%        |
| 7                       | 13.991      | 1635          | 1645        | 1661         | VV 10    | 21265          | 829057                   | 1.04%           | 1.007%        |
| Sum of corrected areas: |             |               |             |              | 82339717 | ckr3.m         | Wed Mar 19 14:38:32 2014 |                 |               |

Abundance

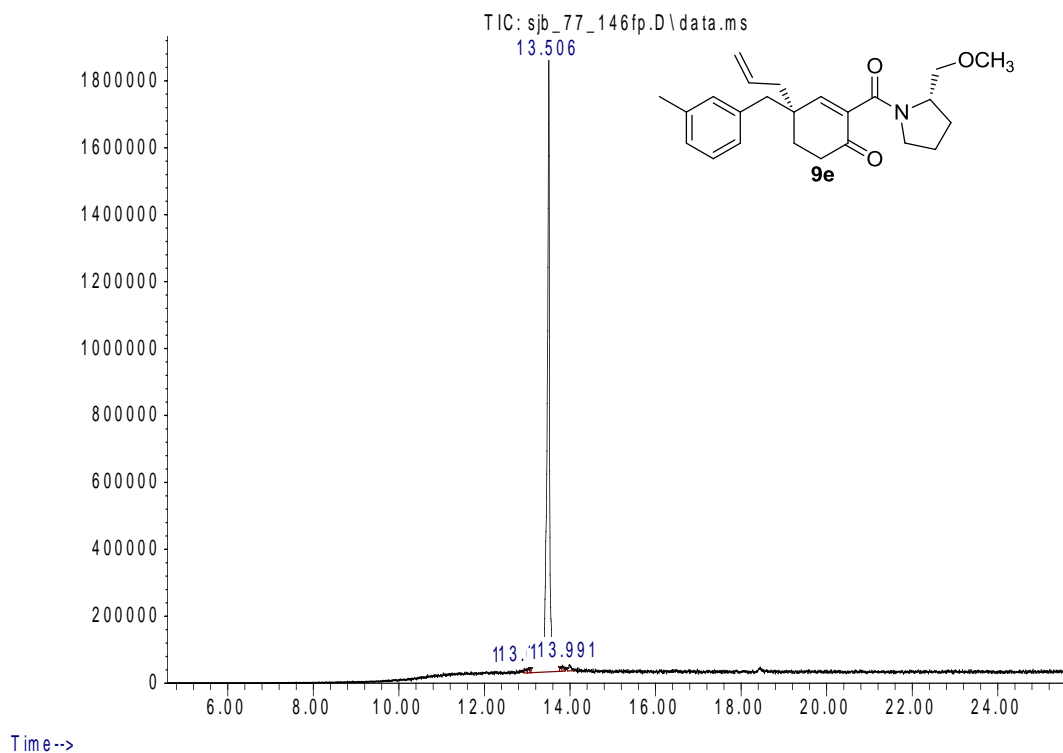

Abundance

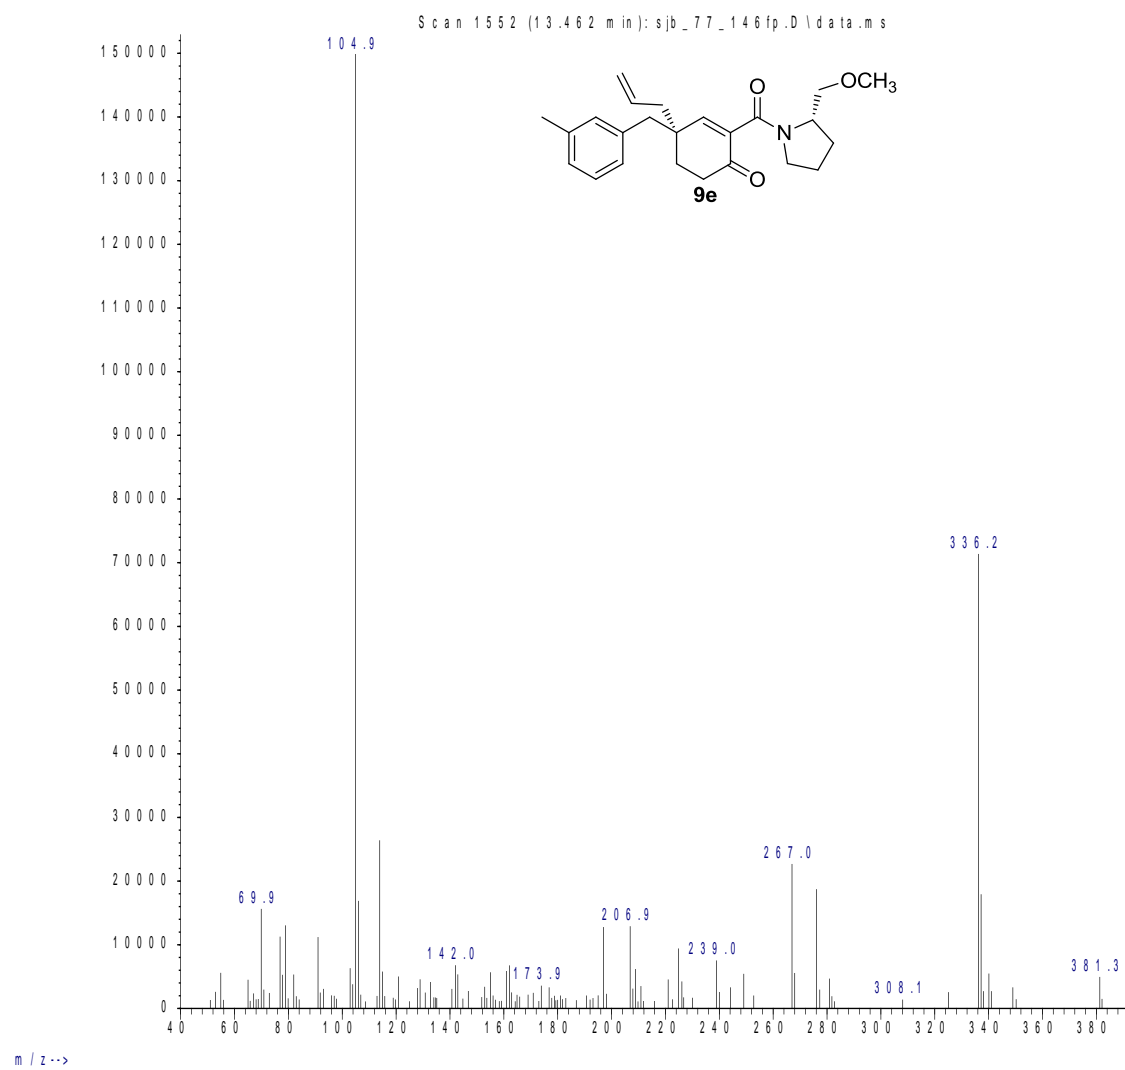

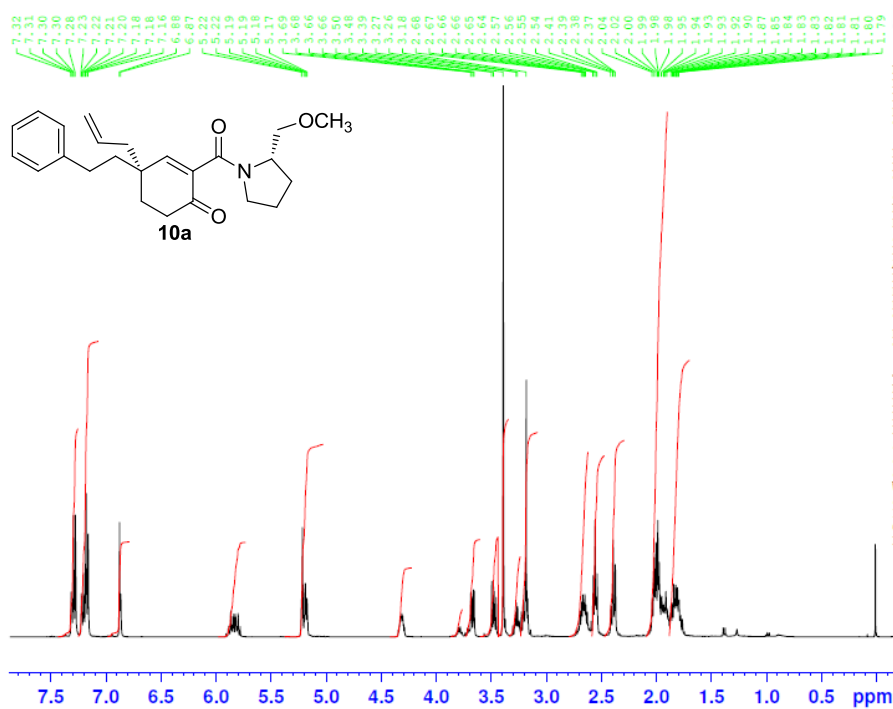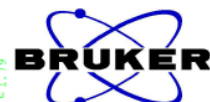

NAME sjb\_72\_132fp take 2  
 EXPNO 1  
 PROCNO 1  
 Date\_ 20130801  
 Time 11.14  
 INSTRUM spect  
 PROBHD 5 mm PABBO BB-  
 PULPROG zg30  
 TD 65536  
 SOLVENT CDCl3  
 NS 16  
 DS 2  
 SWH 8223.685 Hz  
 FIDRES 0.125483 Hz  
 AQ 3.9846387 sec  
 RG 50.8  
 DW 60.800 usec  
 DE 6.50 usec  
 TE 301.2 K  
 D1 1.00000000 sec  
 TDO 1

----- CHANNEL f1 -----  
 NUC1 1H  
 P1 12.50 usec  
 PL1 -2.00 dB  
 PL1W 12.14226913 W  
 SFO1 400.1524711 MHz  
 SI 32768  
 SF 400.1500000 MHz  
 WDW EM  
 SSB 0  
 LB 0.30 Hz  
 GB 0  
 PC 1.00

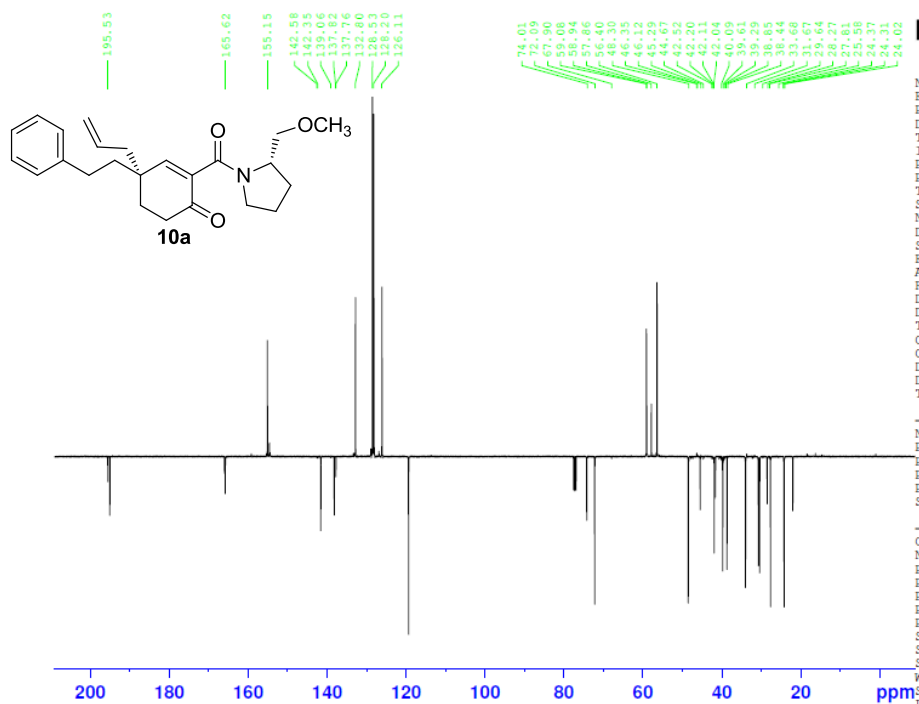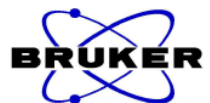

NAME sjb\_74\_207fp APT  
 EXPNO 1  
 PROCNO 1  
 Date\_ 20121116  
 Time 9.22  
 INSTRUM spect  
 PROBHD 5 mm PABBO BB-  
 PULPROG jmod  
 TD 65536  
 SOLVENT CDCl3  
 NS 1024  
 DS 4  
 SWH 21929.824 Hz  
 FIDRES 0.334623 Hz  
 AQ 1.4942708 sec  
 RG 203  
 DW 22.800 usec  
 DE 6.50 usec  
 TE 301.2 K  
 CNST2 145.0000000  
 CNST11 1.0000000  
 D1 2.00000000 sec  
 D20 0.00689655 sec  
 TDO 1

----- CHANNEL f1 -----  
 NUC1 13C  
 P1 8.00 usec  
 P2 16.00 usec  
 PL1 -2.00 dB  
 PL1W 56.13311005 W  
 SFO1 100.6278600 MHz

----- CHANNEL f2 -----  
 CPDPRG2 waltz16  
 NUC2 1H  
 PCPD2 80.00 usec  
 PL2 -2.00 dB  
 PL12 14.00 dB  
 PL2W 12.14226913 W  
 PL12W 0.30500001 W  
 SFO2 400.1514979 MHz  
 SI 32768  
 SF 100.6177980 MHz  
 WDW EM  
 SSB 0  
 LB 1.00 Hz  
 GB 0  
 PC 1.40

# Area Percent Report

Data Path : C:\msdchem\1\DATA\  
 Data File : sjb\_74\_207fp.D  
 Acq On : 15 Nov 2012 17:02  
 Operator : sjb  
 Sample : sjb\_74\_207fp  
 Misc :  
 ALS Vial : 5 Sample Multiplier: 1

Integration Parameters: autoint1.e  
 Integrator: ChemStation

Method : C:\msdchem\1\METHODS\JMB2.m  
 Title :

Signal : TIC: sjb\_74\_207fp.D\data.ms

| peak<br># | R.T.<br>min | first<br>scan | max<br>scan | last<br>scan | PK<br>TY | peak<br>height | corr.<br>area | corr.<br>% max. | % of<br>total |
|-----------|-------------|---------------|-------------|--------------|----------|----------------|---------------|-----------------|---------------|
| 1         | 9.840       | 911           | 919         | 950          | BB 3     | 122085         | 3829247       | 0.28%           | 0.261%        |
| 2         | 14.981      | 1623          | 1817        | 1838         | VV 4     | 9115287        | 1373275457    | 100.00%         | 93.615%       |
| 3         | 15.180      | 1838          | 1852        | 1921         | VV 2     | 1569203        | 89832411      | 6.54%           | 6.124%        |

Sum of corrected areas: 1466937115

JMB2.m Fri Nov 16 09:07:41 2012

Abundance

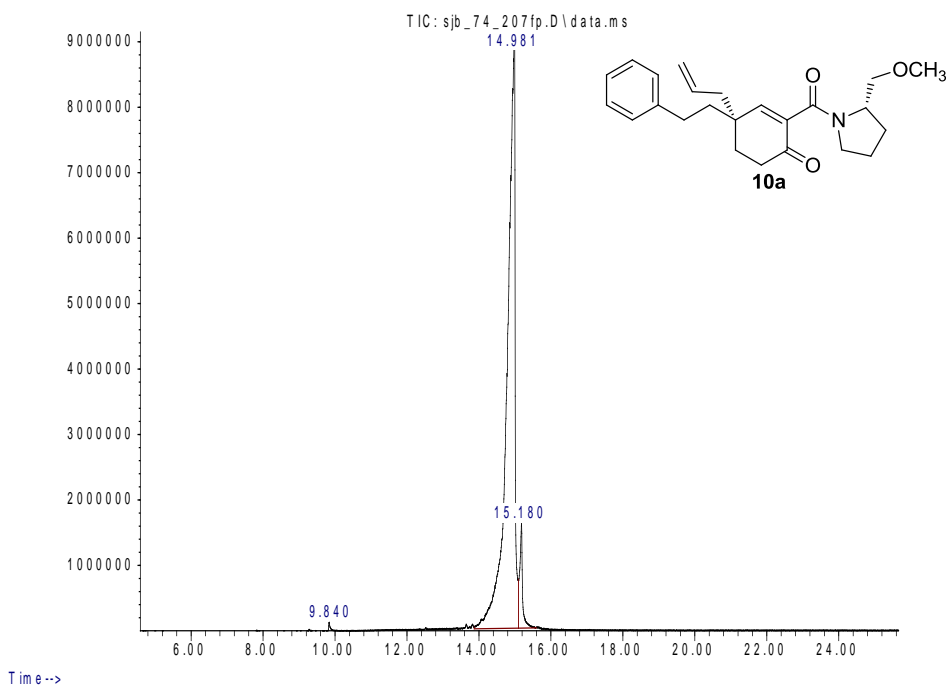

Abundance

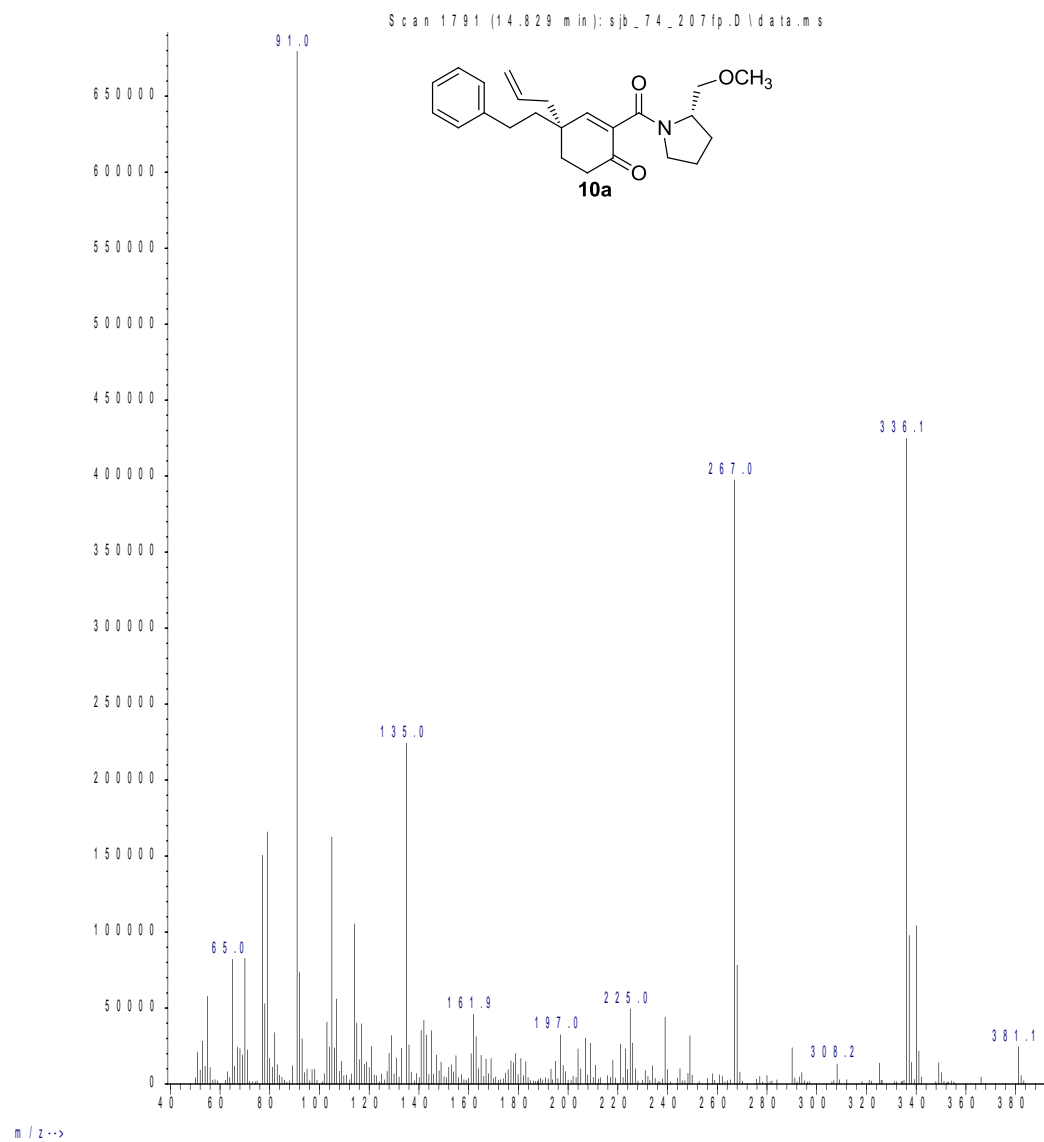

Abundance

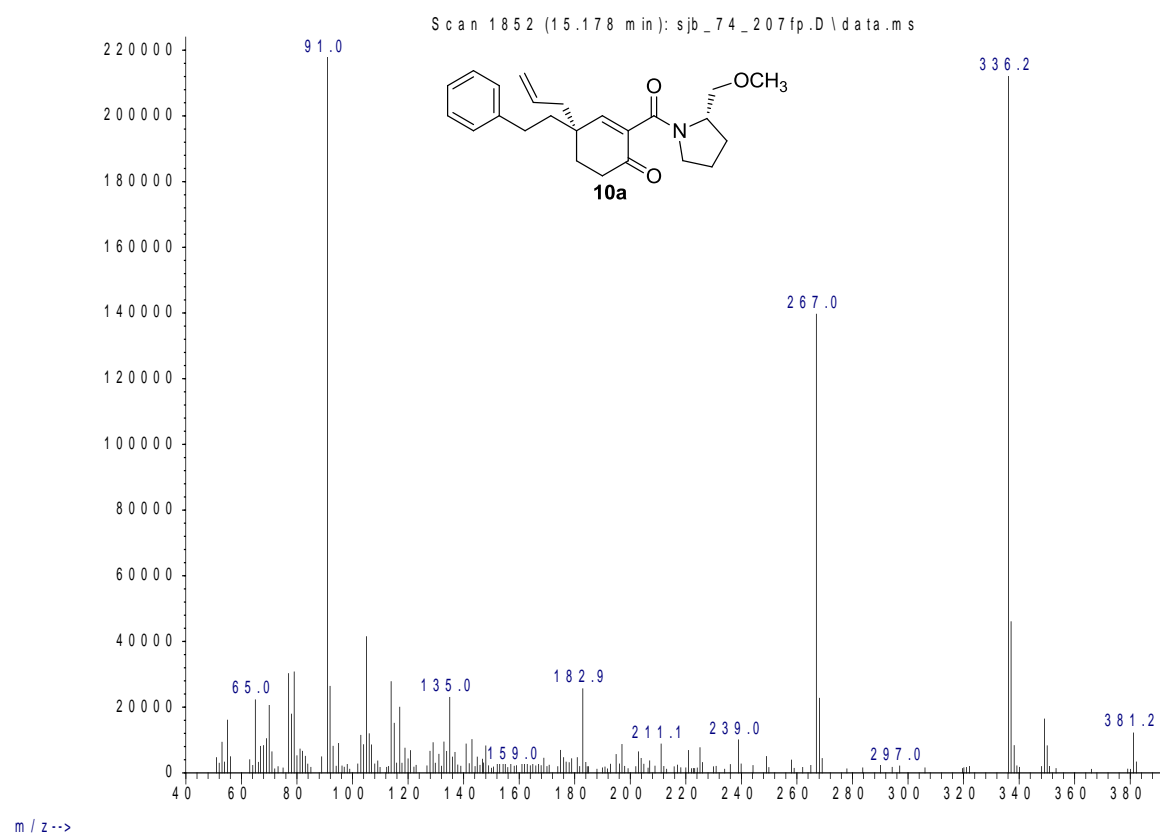

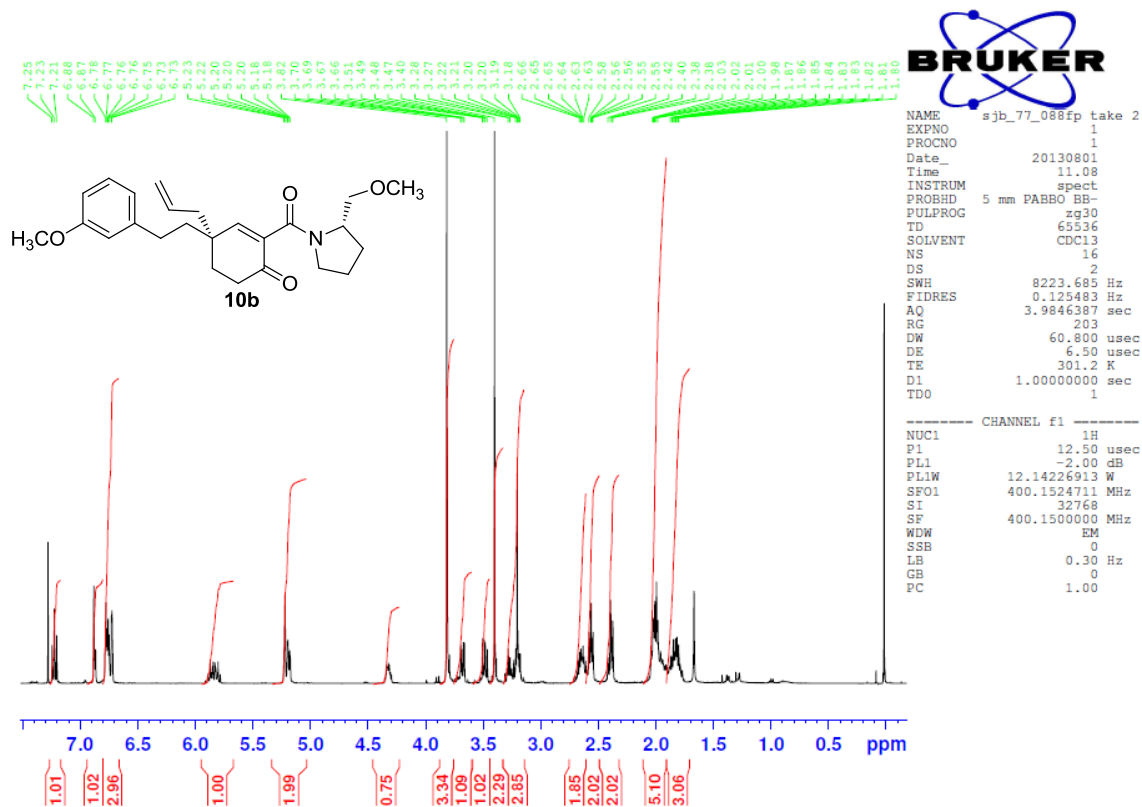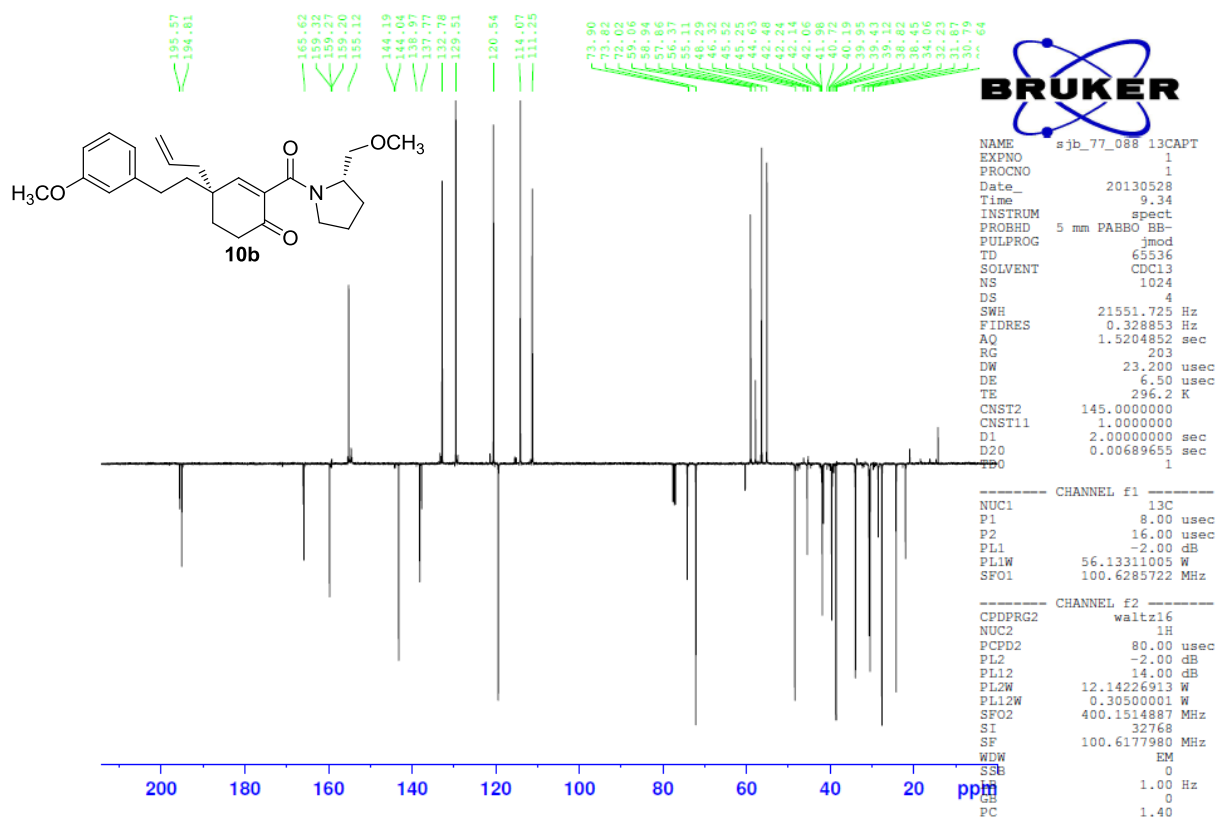

# Area Percent Report

Data Path : C:\msdchem\1\DATA\  
 Data File : sjb\_77\_088fp.D  
 Acq On : 24 May 2013 15:37  
 Operator : sjb  
 Sample : sjb\_77\_088fp  
 Misc :  
 ALS Vial : 90 Sample Multiplier: 1

Integration Parameters: autoint1.e  
 Integrator: ChemStation

Method : C:\msdchem\1\5973N\PRECISION.M  
 Title :

Signal : TIC: sjb\_77\_088fp.D\data.ms

| peak<br># | R.T.<br>min | first<br>scan | max<br>scan | last<br>scan | PK<br>TY | peak<br>height | corr.<br>area | corr.<br>% max. | % of<br>total |
|-----------|-------------|---------------|-------------|--------------|----------|----------------|---------------|-----------------|---------------|
| ---       | -----       | -----         | -----       | -----        | ---      | -----          | -----         | -----           | -----         |
| 1         | 16.585      | 2091          | 2098        | 2102         | VV 10    | 48273          | 1551911       | 0.12%           | 0.068%        |
| 2         | 16.631      | 2102          | 2106        | 2108         | VV 5     | 53733          | 828375        | 0.06%           | 0.036%        |
| 3         | 16.680      | 2108          | 2114        | 2116         | VV 7     | 59458          | 1463538       | 0.11%           | 0.064%        |
| 4         | 16.701      | 2116          | 2118        | 2121         | VV 4     | 69019          | 1154890       | 0.09%           | 0.051%        |
| 5         | 16.748      | 2121          | 2126        | 2128         | VV 6     | 78916          | 1822704       | 0.14%           | 0.080%        |
| 6         | 16.843      | 2128          | 2143        | 2144         | VV 6     | 121092         | 5451740       | 0.42%           | 0.239%        |
| 7         | 17.949      | 2144          | 2336        | 2337         | VV 4     | 7155601        | 1309161021    | 100.00%         | 57.386%       |
| 8         | 18.023      | 2337          | 2349        | 2413         | VV 4     | 8170841        | 805405891     | 61.52%          | 35.304%       |
| 9         | 18.508      | 2413          | 2434        | 2507         | VV 4     | 1622052        | 154484566     | 11.80%          | 6.772%        |

Sum of corrected areas: 2281324637

Abundance

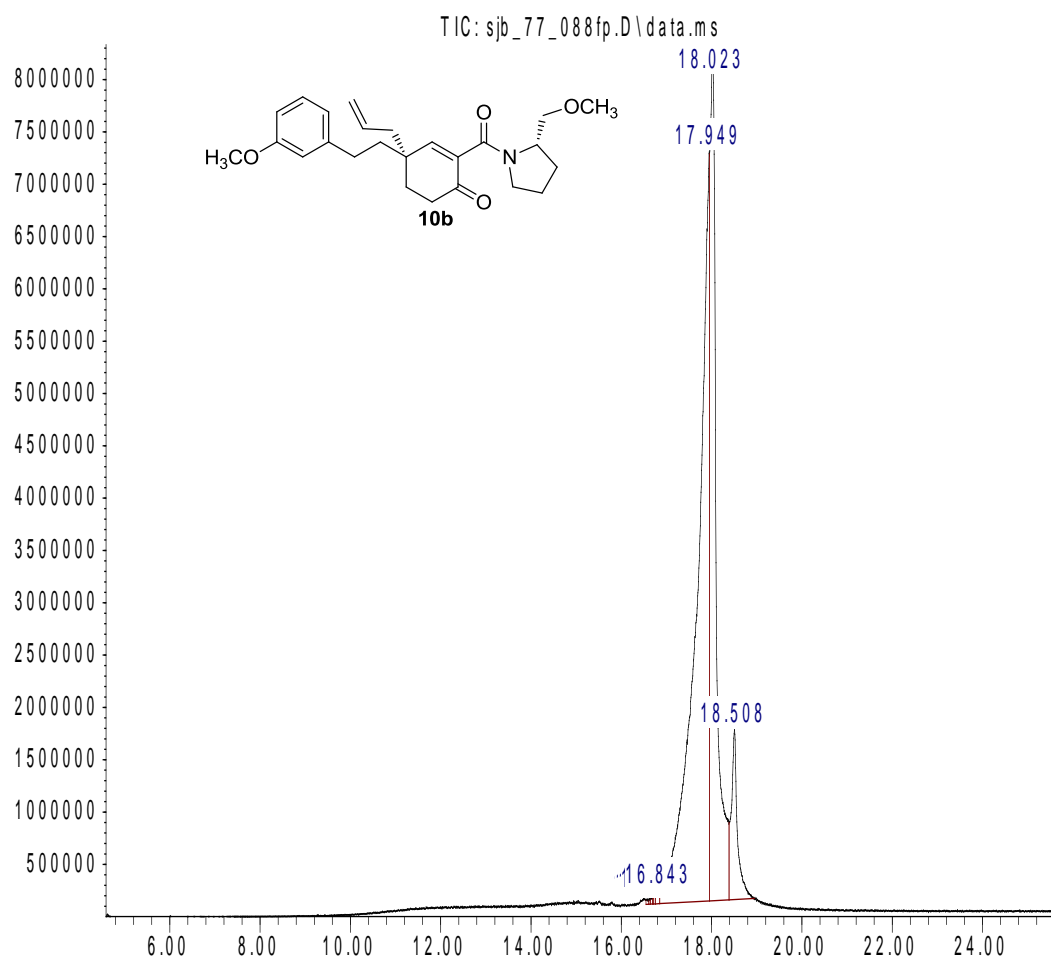

Time-->

Abundance

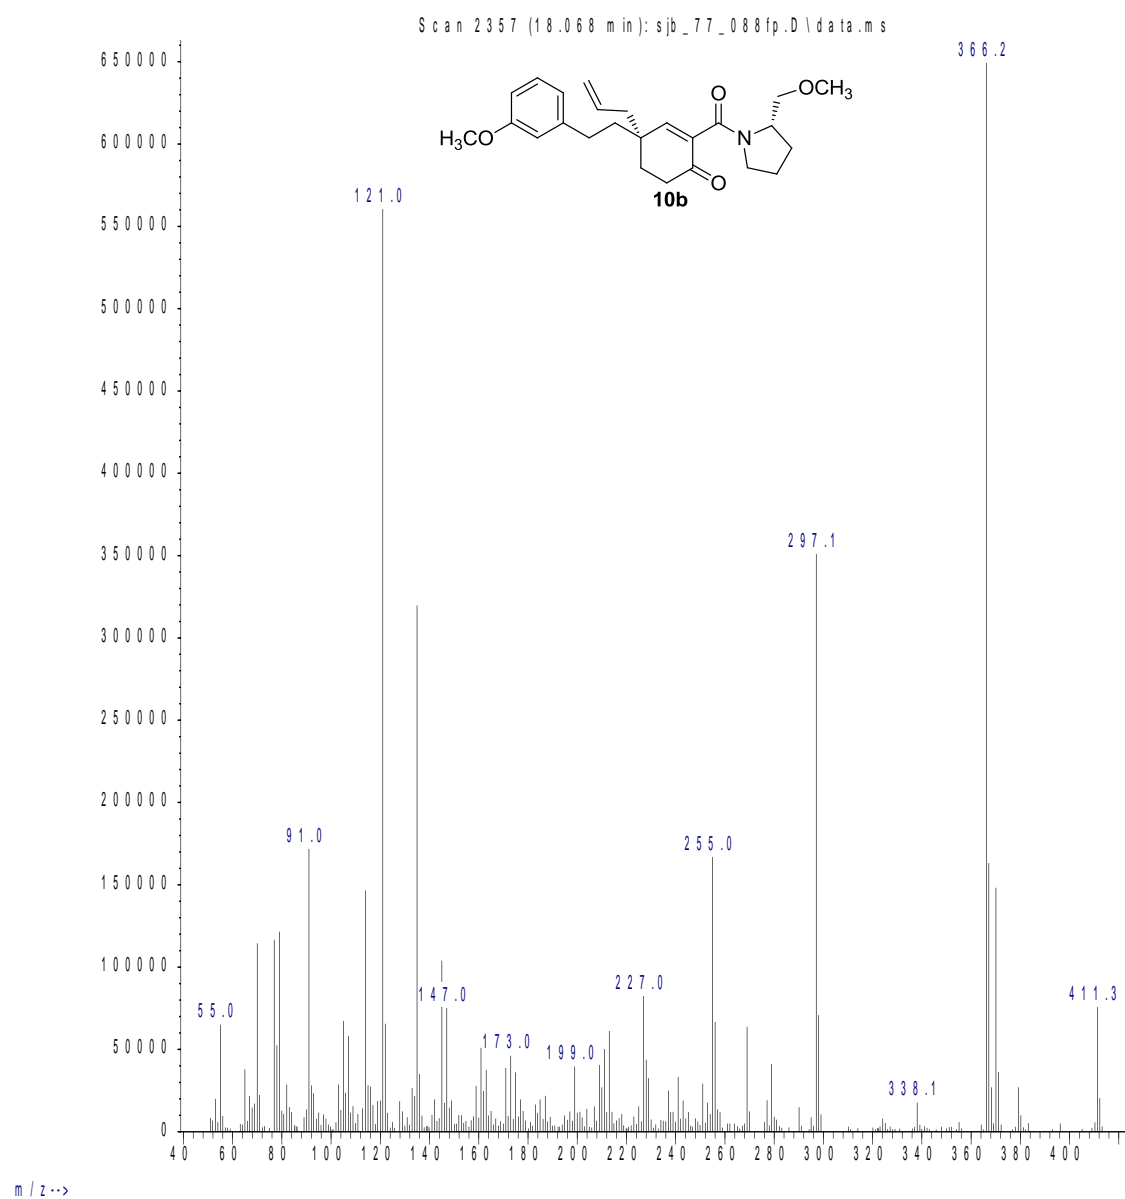

Abundance

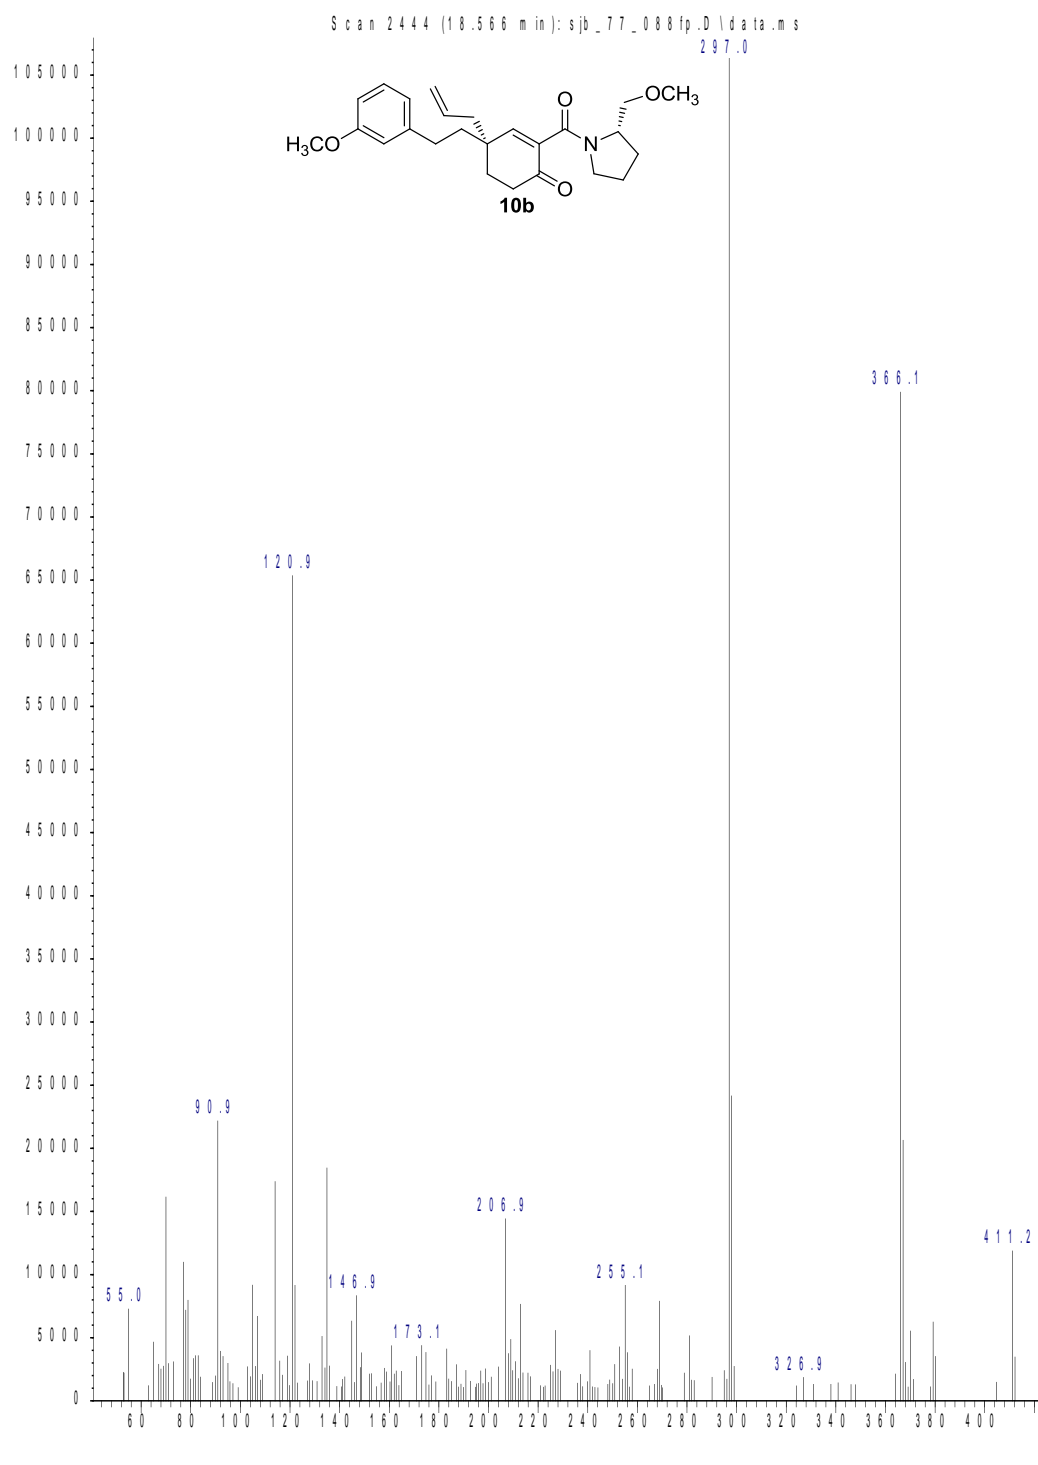

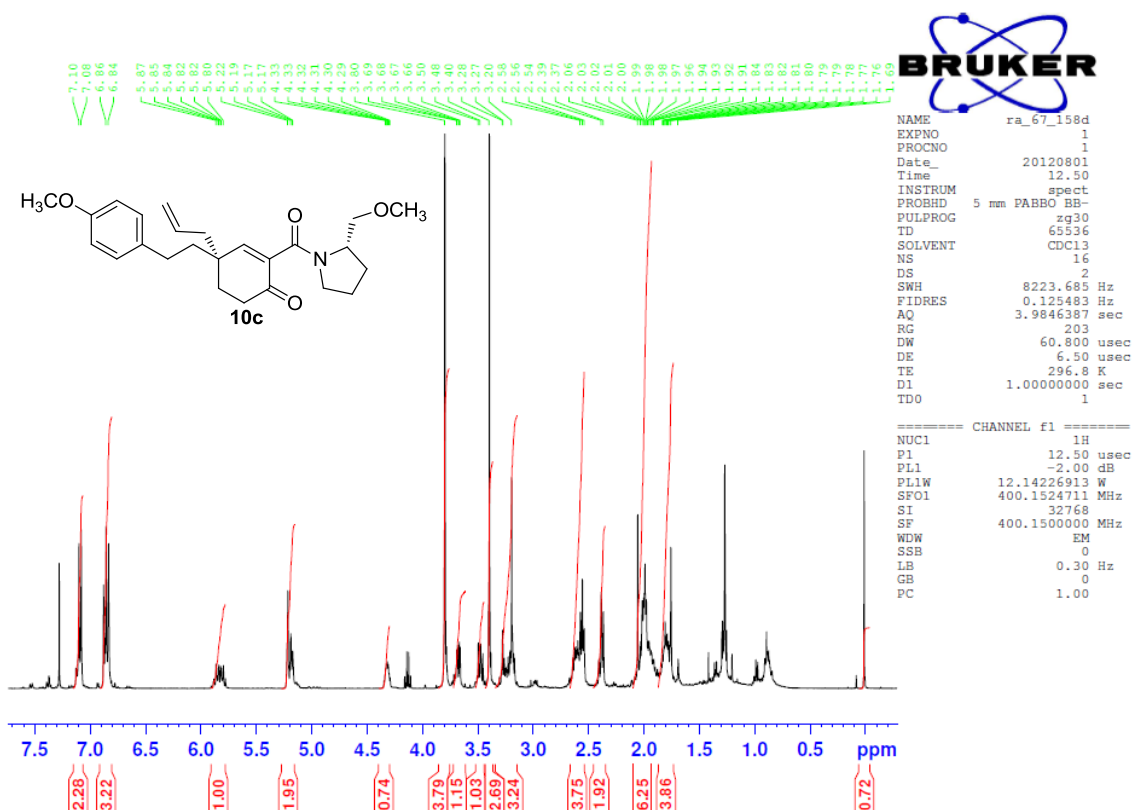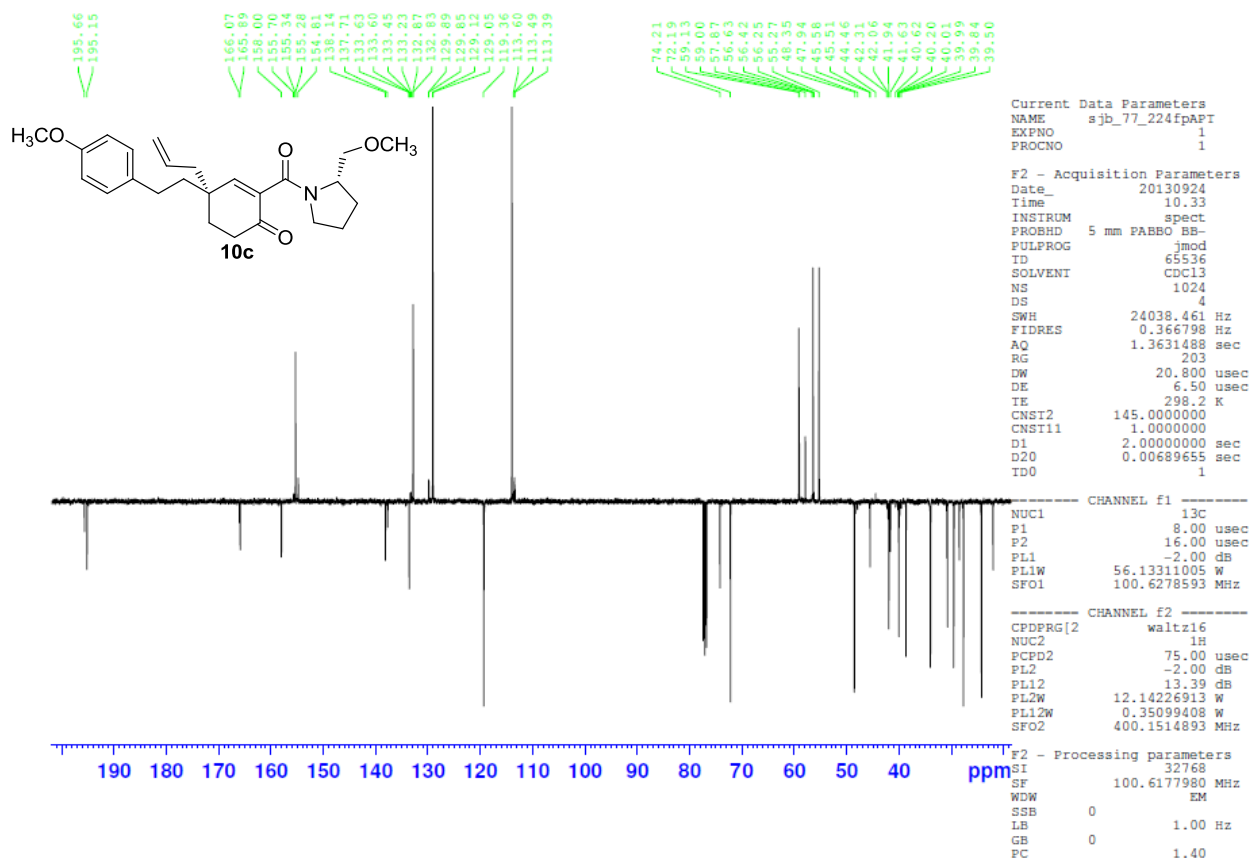

# Area Percent Report

Data Path : C:\msdchem\1\DATA\  
 Data File : sjb\_77\_224fp2.D  
 Acq On : 24 Sep 2013 11:10  
 Operator : sjb  
 Sample : sjb\_77\_224fp2  
 Misc :  
 ALS Vial : 90 Sample Multiplier: 1

Integration Parameters: autoint1.e  
 Integrator: ChemStation

Method : C:\msdchem\1\METHODS\ckr3.m  
 Title :

Signal : TIC: sjb\_77\_224fp2.D\data.ms

| peak<br># | R.T.<br>min | first<br>scan | max<br>scan | last<br>scan | PK<br>TY | peak<br>height | corr.<br>area | corr.<br>% max. | % of<br>total |
|-----------|-------------|---------------|-------------|--------------|----------|----------------|---------------|-----------------|---------------|
| 1         | 17.080      | 2166          | 2184        | 2195         | PV 5     | 5922           | 119715        | 0.06%           | 0.053%        |
| 2         | 18.690      | 2249          | 2466        | 2513         | VV 4     | 1027532        | 212733185     | 100.00%         | 94.455%       |
| 3         | 19.059      | 2513          | 2530        | 2589         | VV 2     | 146573         | 12368129      | 5.81%           | 5.492%        |

Sum of corrected areas: 225221029

ckr3.m Wed Mar 19 12:16:28 2014

Abundance

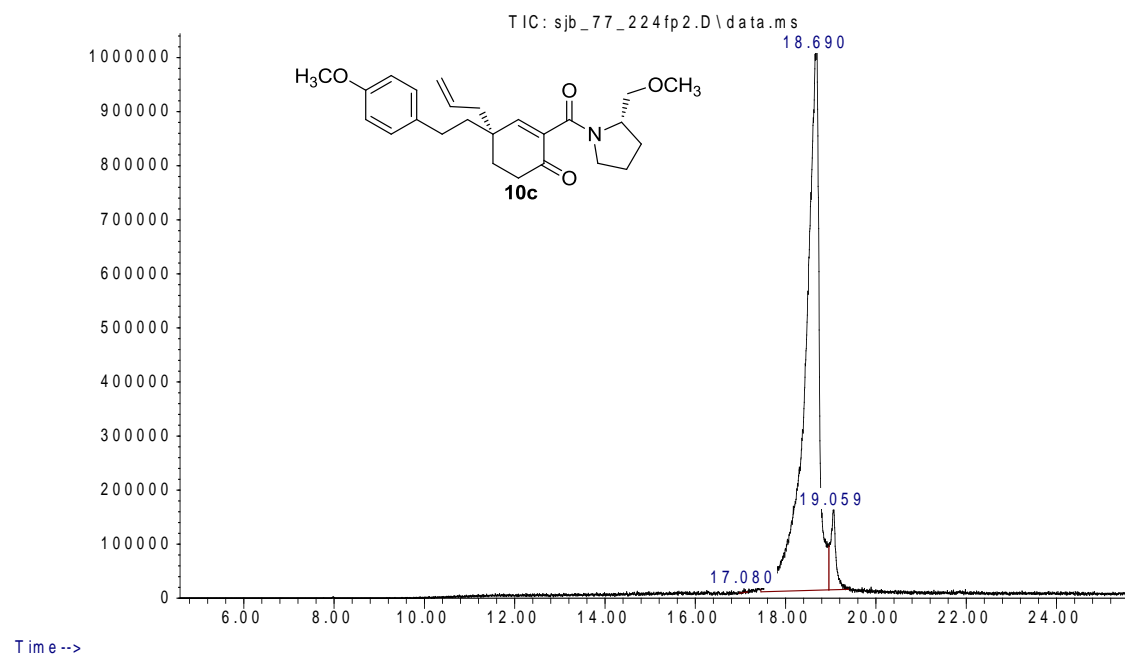

Abundance

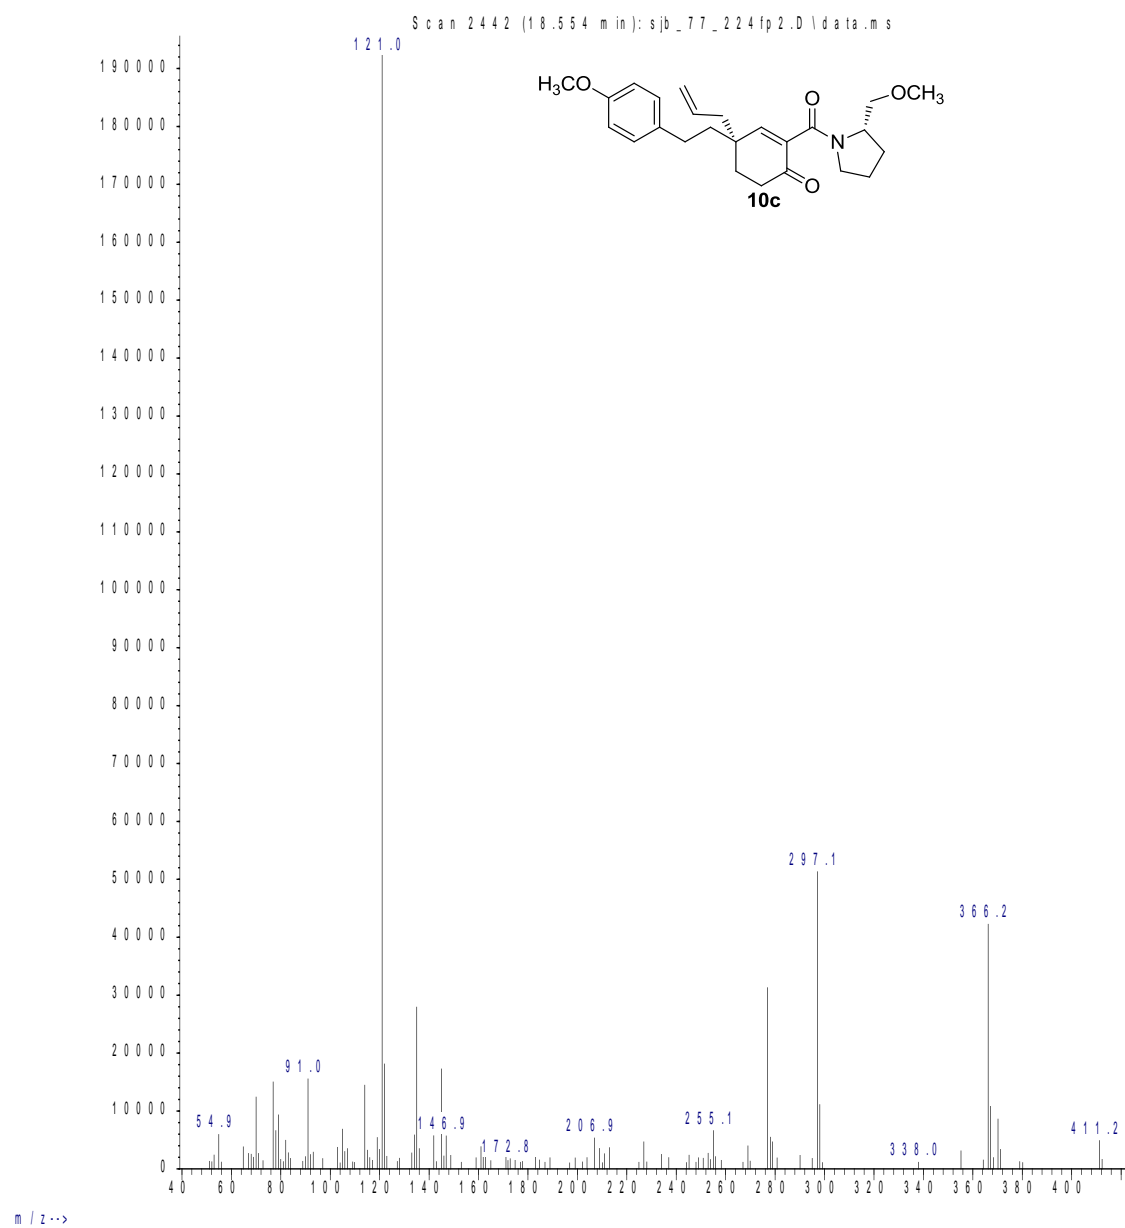

Abundance

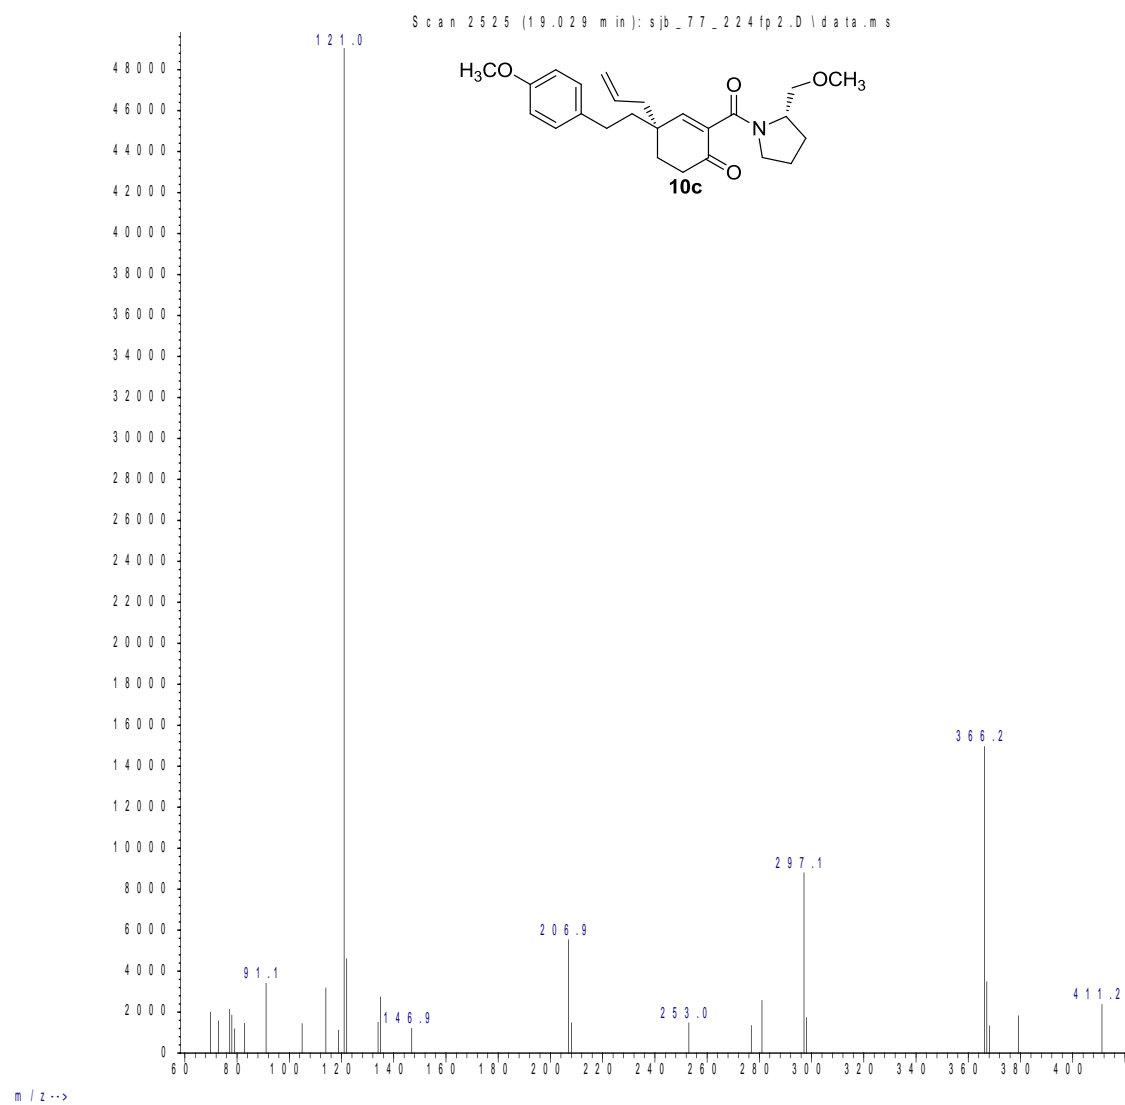

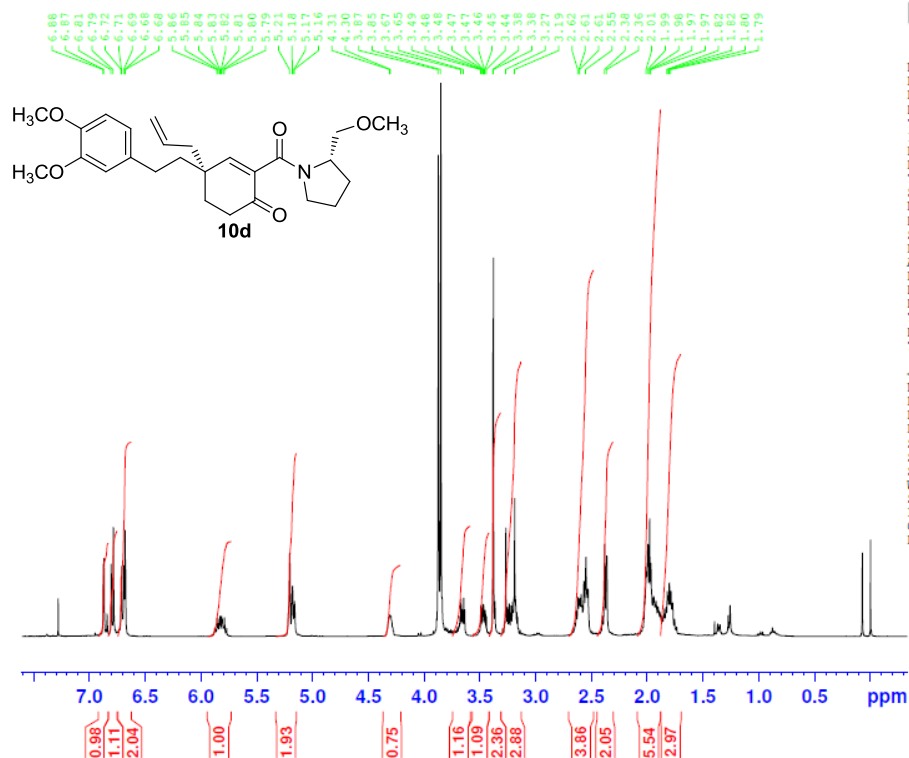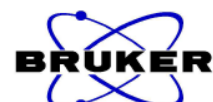

NAME: sjb\_74\_219fp take 2  
 EXPNO: 1  
 PROCNO: 1  
 Date\_: 20130801  
 Time: 10.27  
 INSTRUM: spect  
 PROBHD: 5 mm PABBO BB-  
 PULPROG: zg30  
 TD: 65536  
 SOLVENT: CDCl3  
 NS: 16  
 DS: 2  
 SWH: 8223.685 Hz  
 FIDRES: 0.125483 Hz  
 AQ: 3.9846387 sec  
 RG: 50.8  
 DW: 60.800 usec  
 DE: 6.50 usec  
 TE: 301.2 K  
 D1: 1.00000000 sec  
 TDO: 1

----- CHANNEL f1 -----  
 NUC1: <sup>1</sup>H  
 P1: 12.50 usec  
 PL1: -2.00 dB  
 PL1W: 12.14226913 W  
 SFO1: 400.1524711 MHz  
 SI: 32768  
 SF: 400.1500000 MHz  
 WDW: EM  
 SSB: 0  
 LB: 0.30 Hz  
 GB: 0  
 PC: 1.00

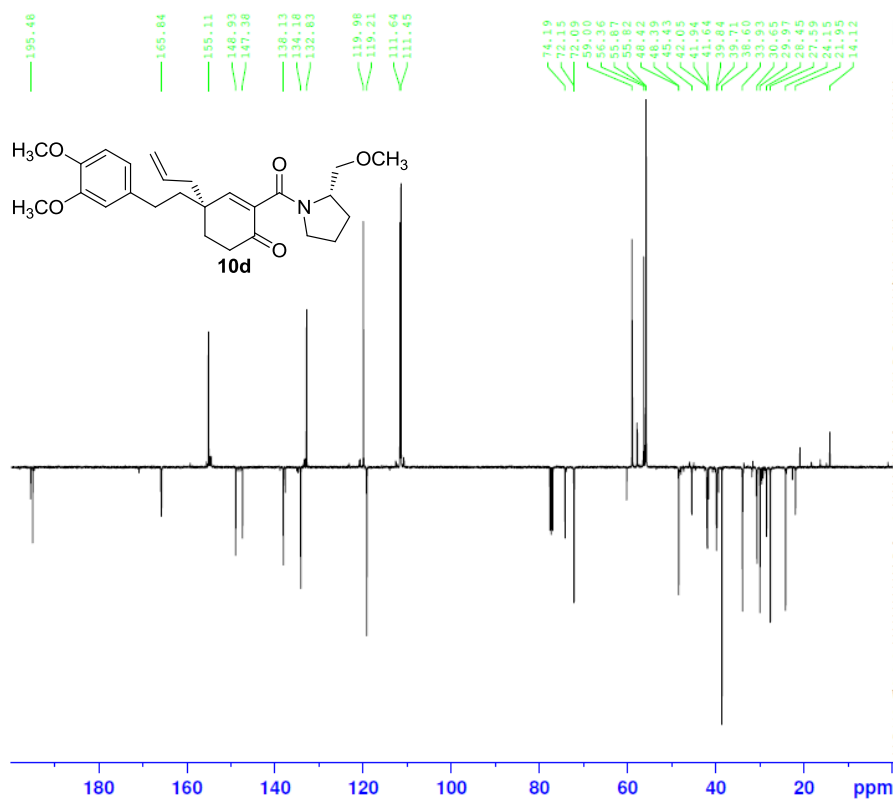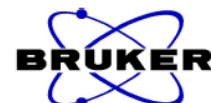

NAME: sjb\_74\_219fp APT  
 EXPNO: 1  
 PROCNO: 1  
 Date\_: 20121204  
 Time: 13.18  
 INSTRUM: spect  
 PROBHD: 5 mm PABBO BB-  
 PULPROG: jmod  
 TD: 65536  
 SOLVENT: CDCl3  
 NS: 1024  
 DS: 4  
 SWH: 20380.436 Hz  
 FIDRES: 0.310981 Hz  
 AQ: 1.6078665 sec  
 RG: 203  
 DW: 24.533 usec  
 DE: 6.50 usec  
 TE: 301.2 K  
 CNST2: 145.0000000  
 CNST11: 1.0000000  
 D1: 2.00000000 sec  
 D20: 0.00689655 sec  
 TDO: 1

----- CHANNEL f1 -----  
 NUC1: <sup>13</sup>C  
 P1: 8.00 usec  
 P2: 16.00 usec  
 PL1: -2.00 dB  
 PL1W: 56.13311005 W  
 SFO1: 100.6277079 MHz

----- CHANNEL f2 -----  
 CPDPRG2: waltz16  
 NUC2: <sup>1</sup>H  
 P2PD2: 80.00 usec  
 PL2: -2.00 dB  
 PL12: 14.00 dB  
 PL2W: 12.14226913 W  
 PL12W: 0.30500001 W  
 SFO2: 400.1514166 MHz  
 SI: 32768  
 SF: 100.6177980 MHz  
 WDW: EM  
 SSB: 0  
 LB: 1.00 Hz  
 GB: 0  
 PC: 1.40

# Area Percent Report

Data Path : C:\msdchem\1\DATA\  
Data File : sjb\_77\_178fp.D  
Acq On : 13 Aug 2013 14:33  
Operator : sjb  
Sample : sjb\_77\_178fp  
Misc :  
ALS Vial : 100 Sample Multiplier: 1

Integration Parameters: autoint1.e  
Integrator: ChemStation

Method : C:\msdchem\1\METHODS\ckr3.m  
Title :

Signal : TIC: sjb\_77\_178fp.D\data.ms

| peak<br># | R.T.<br>min | first<br>scan | max<br>scan | last<br>scan | PK<br>TY | peak<br>height | corr.<br>area | corr.<br>% max. | % of<br>total |
|-----------|-------------|---------------|-------------|--------------|----------|----------------|---------------|-----------------|---------------|
| 1         | 21.994      | 2744          | 3043        | 3105         | M3       | 637493         | 229798336     | 100.00%         | 92.496%       |
| 2         | 22.587      | 3108          | 3147        | 3225         | M4       | 157004         | 18641866      | 8.11%           | 7.504%        |

Sum of corrected areas: 248440203

ckr3.m Mon May 12 15:41:13 2014

Abundance

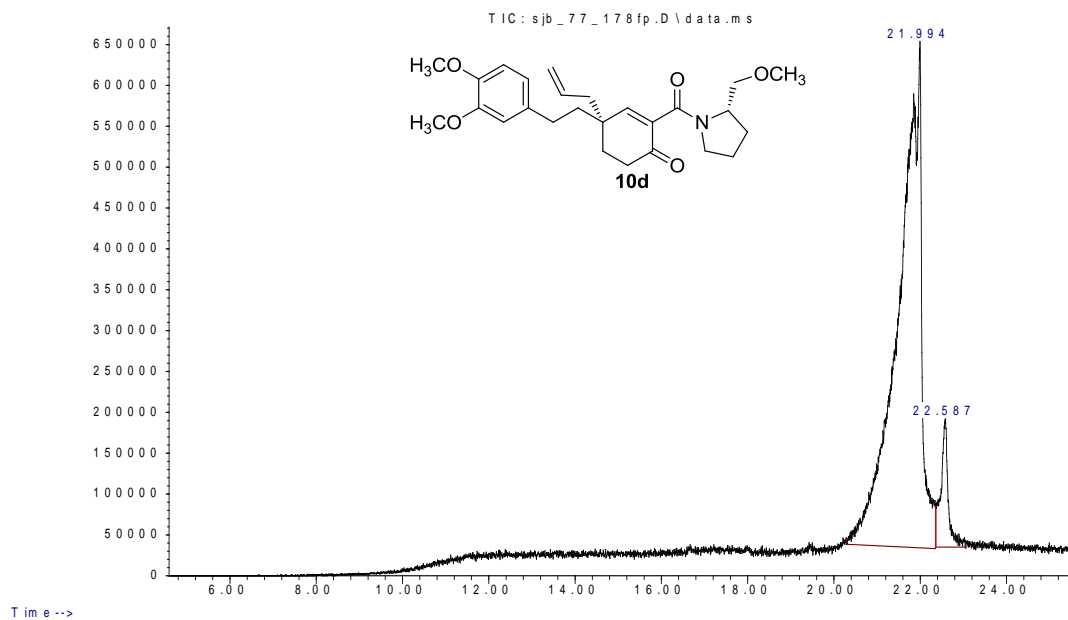

Abundance

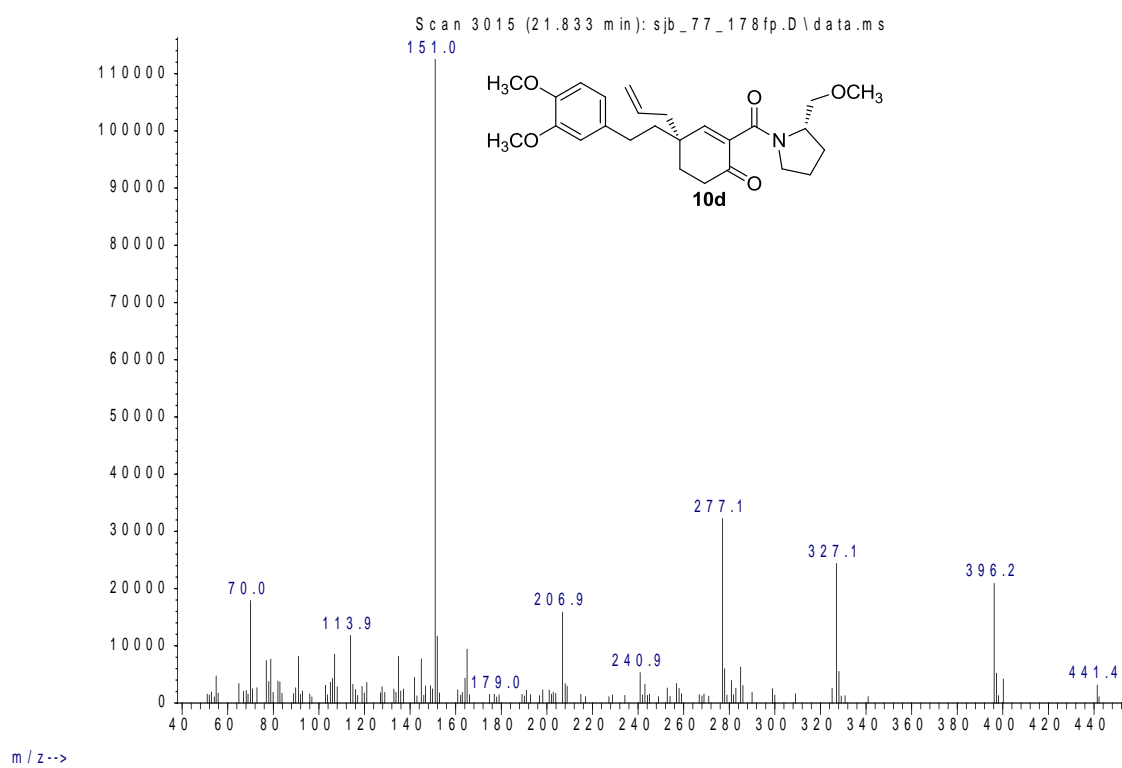

Abundance

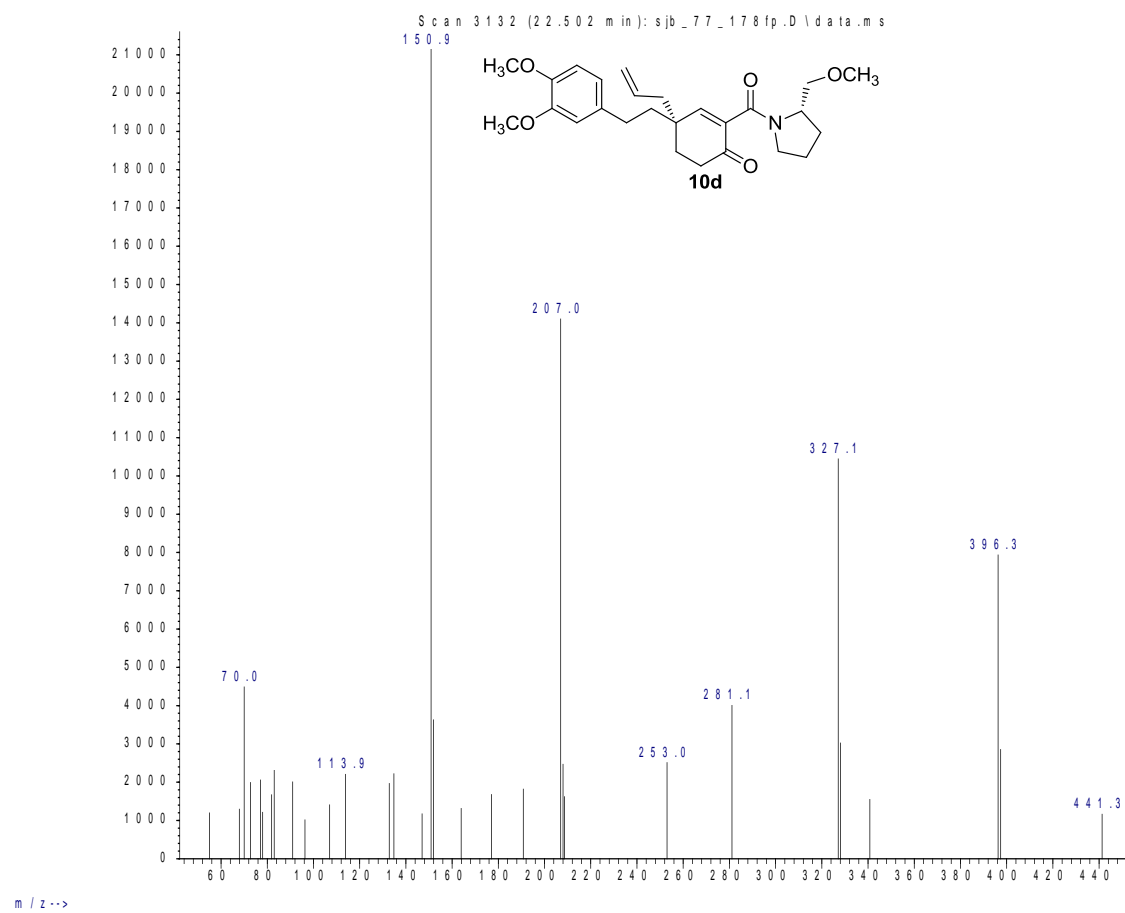

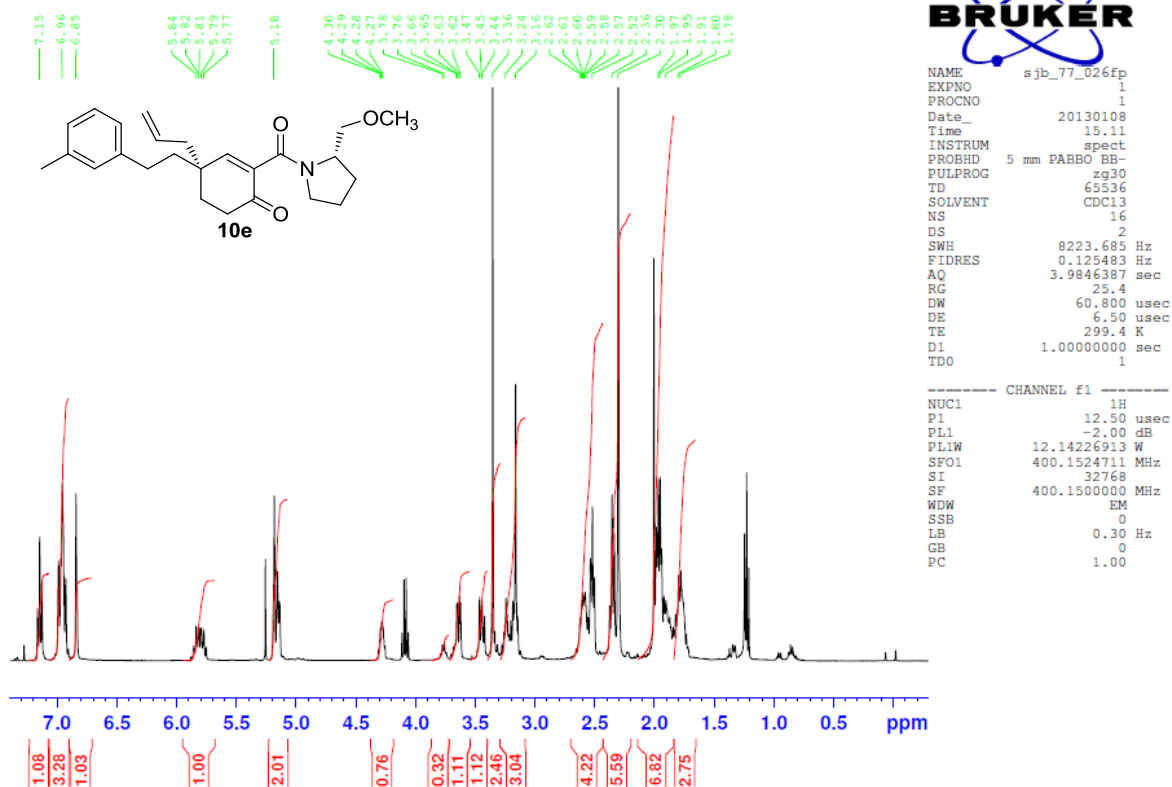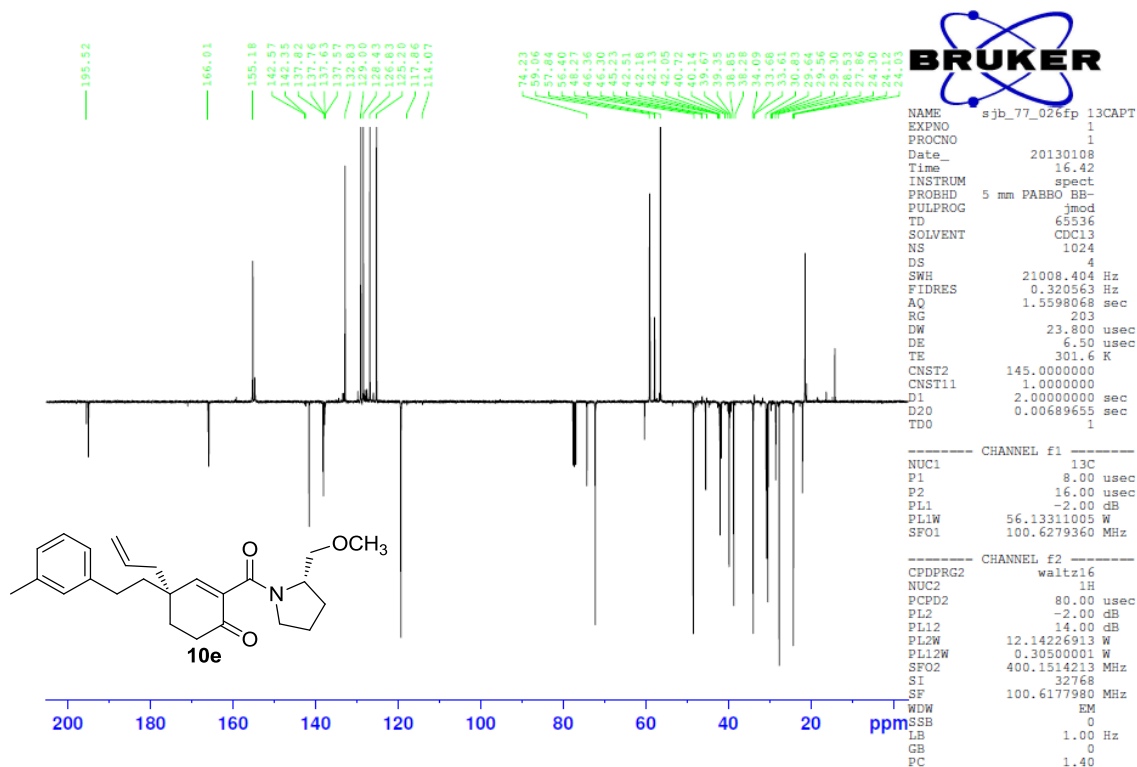

# Area Percent Report

Data Path : C:\msdchem\1\DATA\  
 Data File : sjb\_77\_026fp.D  
 Acq On : 8 Jan 2013 15:19  
 Operator : sjb  
 Sample : sjb\_77\_026fp  
 Misc :  
 ALS Vial : 5 Sample Multiplier: 1

Integration Parameters: autoint1.e  
 Integrator: ChemStation

Method : C:\msdchem\1\METHODS\ckr3.m  
 Title :

Signal : TIC: sjb\_77\_026fp.D\data.ms

| peak<br># | R.T.<br>min | first<br>scan | max<br>scan | last<br>scan | PK<br>TY | peak<br>height | corr.<br>area | corr.<br>% max. | % of<br>total |
|-----------|-------------|---------------|-------------|--------------|----------|----------------|---------------|-----------------|---------------|
| 1         | 15.665      | 1783          | 1937        | 1969         | VV 4     | 2054550        | 248861067     | 100.00%         | 93.344%       |
| 2         | 15.855      | 1969          | 1970        | 1981         | VV 8     | 91613          | 3553786       | 1.43%           | 1.333%        |
| 3         | 15.997      | 1981          | 1995        | 2017         | VV 6     | 301860         | 13684775      | 5.50%           | 5.133%        |
| 4         | 16.137      | 2017          | 2020        | 2030         | VV 4     | 19764          | 505636        | 0.20%           | 0.190%        |

Sum of corrected areas: 266605263

ckr3.m Wed Mar 19 12:22:46 2014

Abundance

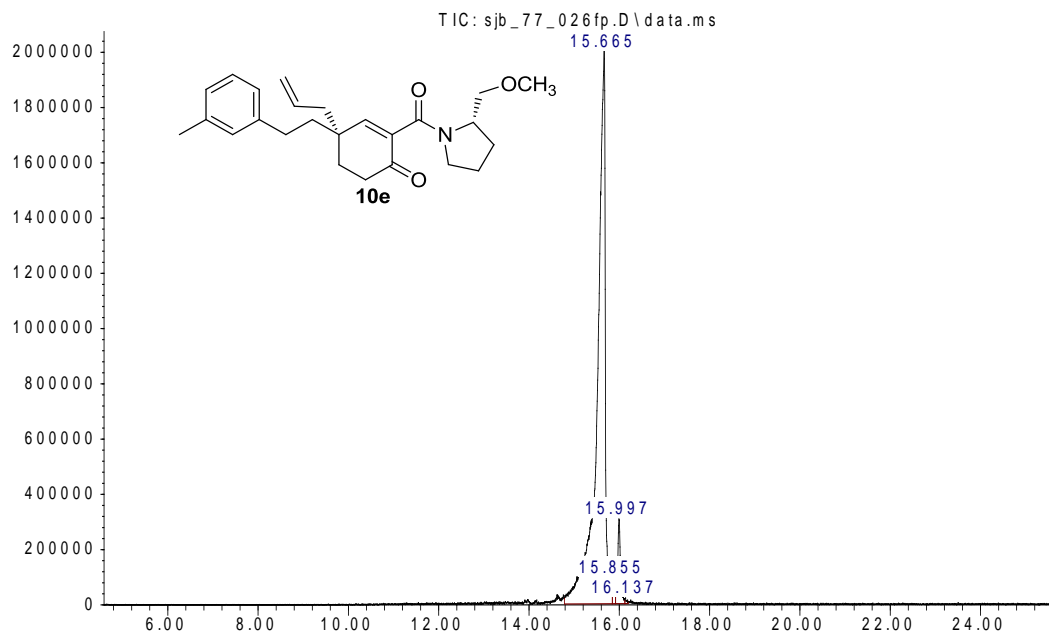

Abundance

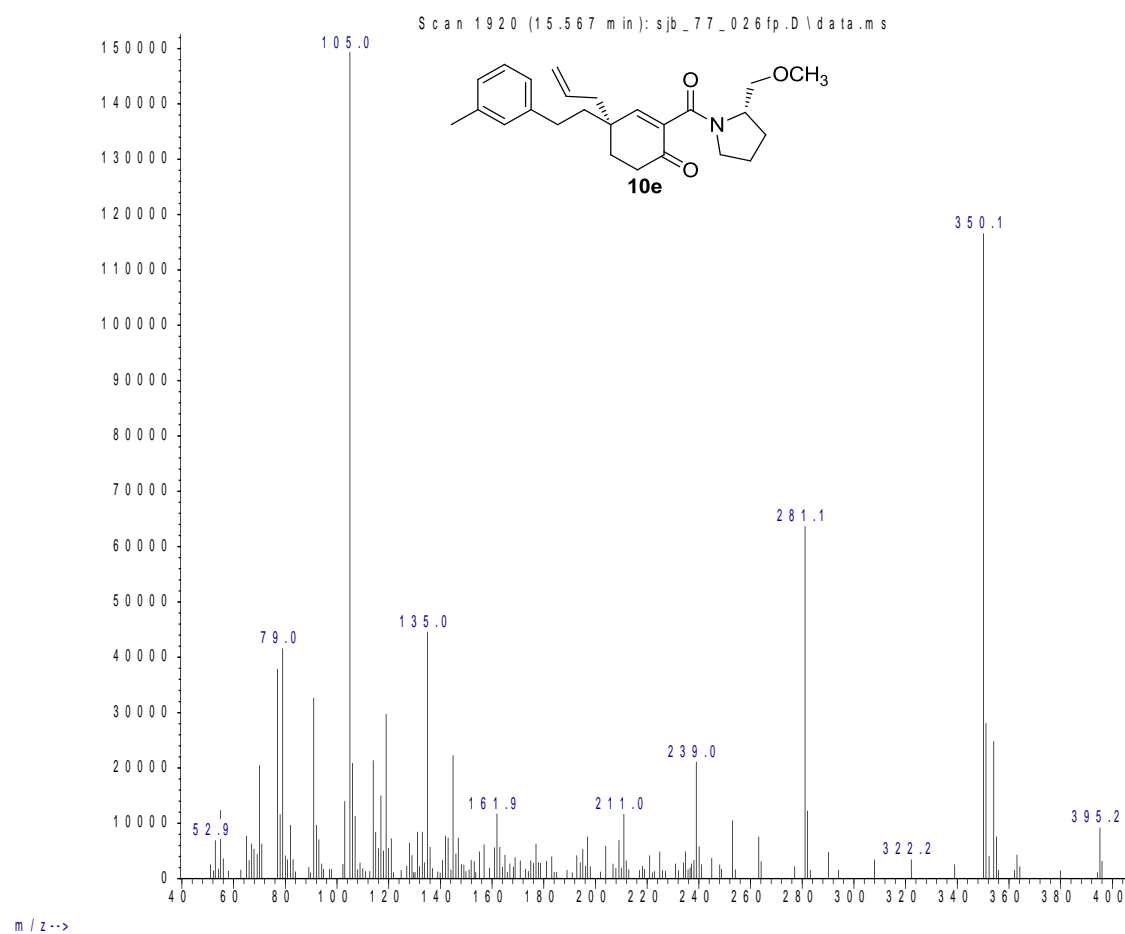

Abundance

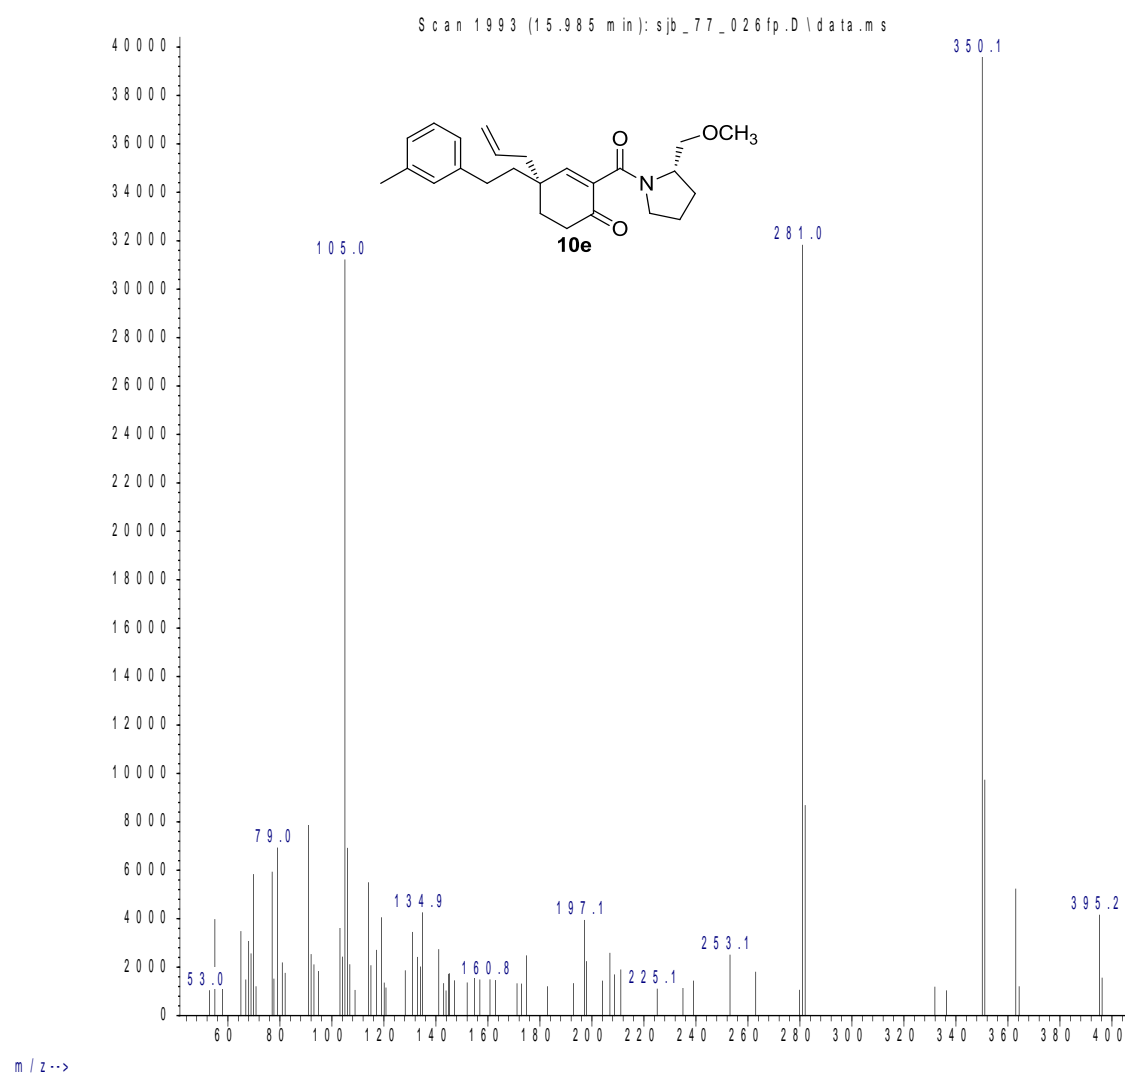

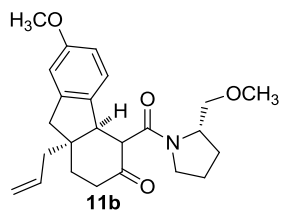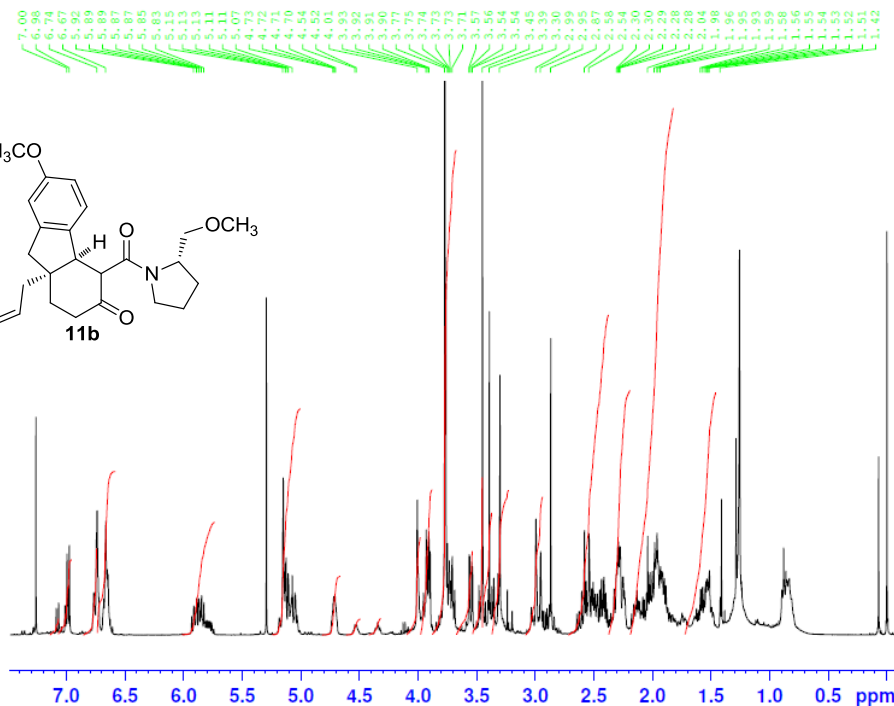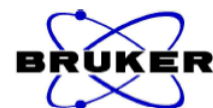

NAME sjb\_74\_172fp  
EXPNO 1  
PROCNO 1  
Date\_ 20121011  
Time 15.16  
INSTRUM spect  
PROBHD 5 mm DUL 13C-1  
PULPROG zg30  
TD 65536  
SOLVENT CDC13  
NS 16  
DS 2  
SWH 8223.685 Hz  
FIDRES 0.125483 Hz  
AQ 3.9846387 sec  
RG 114  
DW 60.800 usec  
DE 6.50 usec  
TE 301.0 K  
D1 1.00000000 sec  
TD0 1

===== CHANNEL f1 =====  
NUC1 1H  
P1 9.80 usec  
PL1 -4.00 dB  
PL1W 19.24419975 W  
SFO1 400.1524711 MHz  
SI 32768  
SF 400.1500077 MHz  
WDW EM  
SSB 0  
LB 0.30 Hz  
GB 0  
PC 1.00

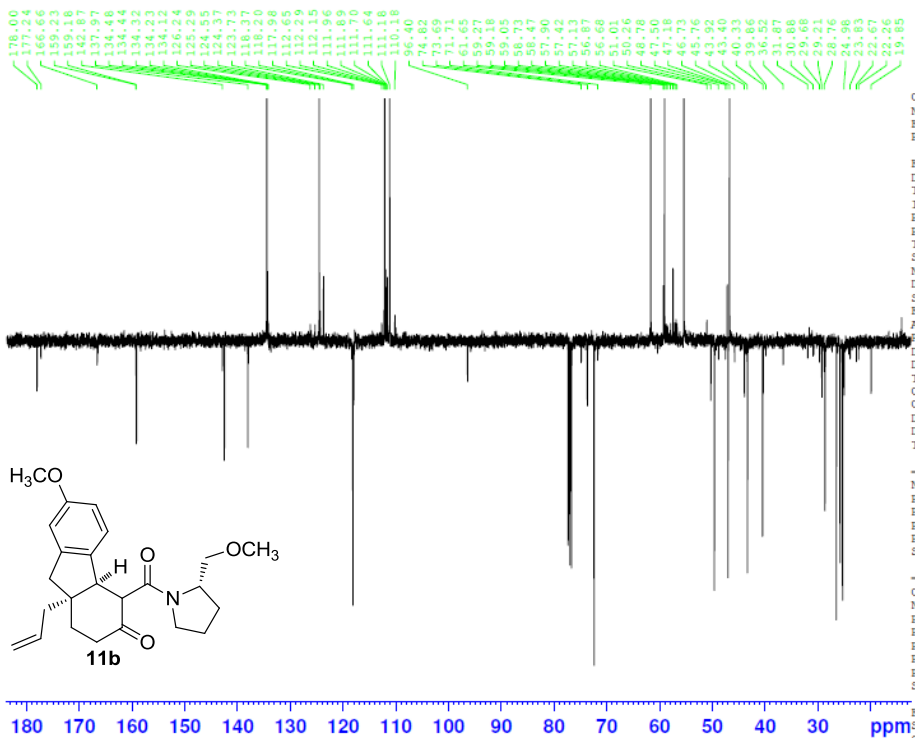

Current Data Parameters  
NAME sjb\_74\_185 APT  
EXPNO 1  
PROCNO 1

F2 - Acquisition Parameters  
Date\_ 20121024  
Time 9.09  
INSTRUM spect  
PROBHD 5 mm DUL 13C-1  
PULPROG jmod  
TD 65536  
SOLVENT CDC13  
NS 1024  
DS 4  
SWH 19230.770 Hz  
FIDRES 0.293438 Hz  
AQ 1.7039360 sec  
RG 203  
DW 26.000 usec  
DE 6.50 usec  
TE 301.2 K  
CNS12 145.0000000  
CNS11 1.0000000  
D1 2.00000000 sec  
D20 0.00689655 sec  
TD0 1

===== CHANNEL f1 =====  
NUC1 13C  
P1 9.00 usec  
F2 18.00 usec  
PL1 0 dB  
PL1W 35.41759872 W  
SFO1 100.6269591 MHz

===== CHANNEL f2 =====  
CPDPRG2 waltz16  
NUC2 1H  
PCPD2 80.00 usec  
PL2 -3.80 dB  
PL12 13.80 dB  
PL2W 18.37806702 W  
PL12W 0.31937420 W  
SFO2 400.1514663 MHz

F2 - Processing parameters  
SI 32768  
SF 100.6177980 MHz  
WDW EM  
SSB 0  
LB 1.00 Hz  
GB 0  
PC 1.40

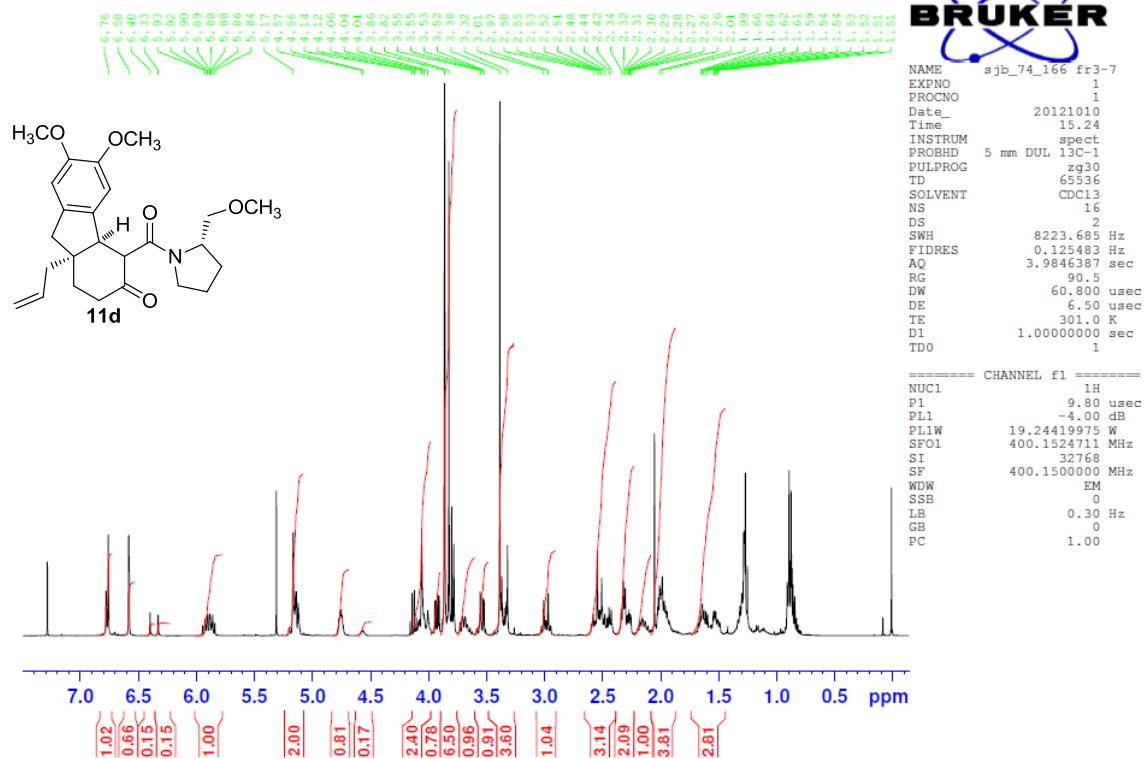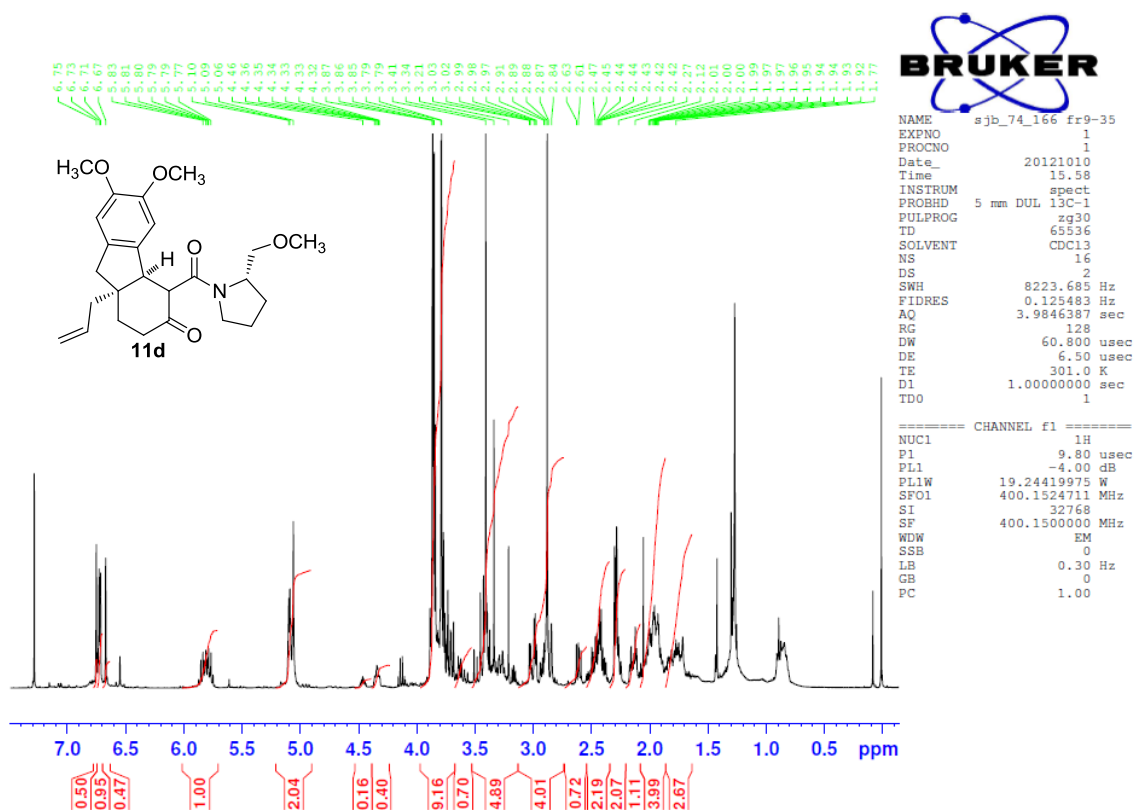

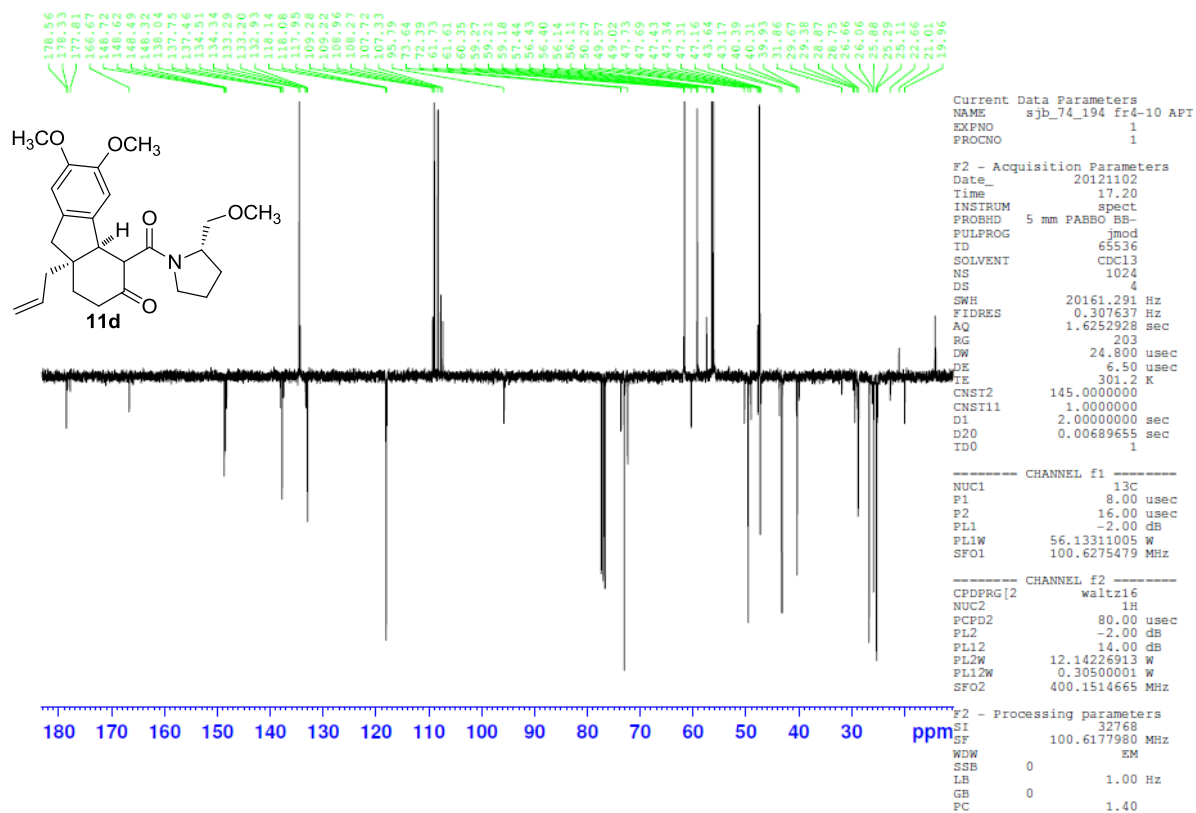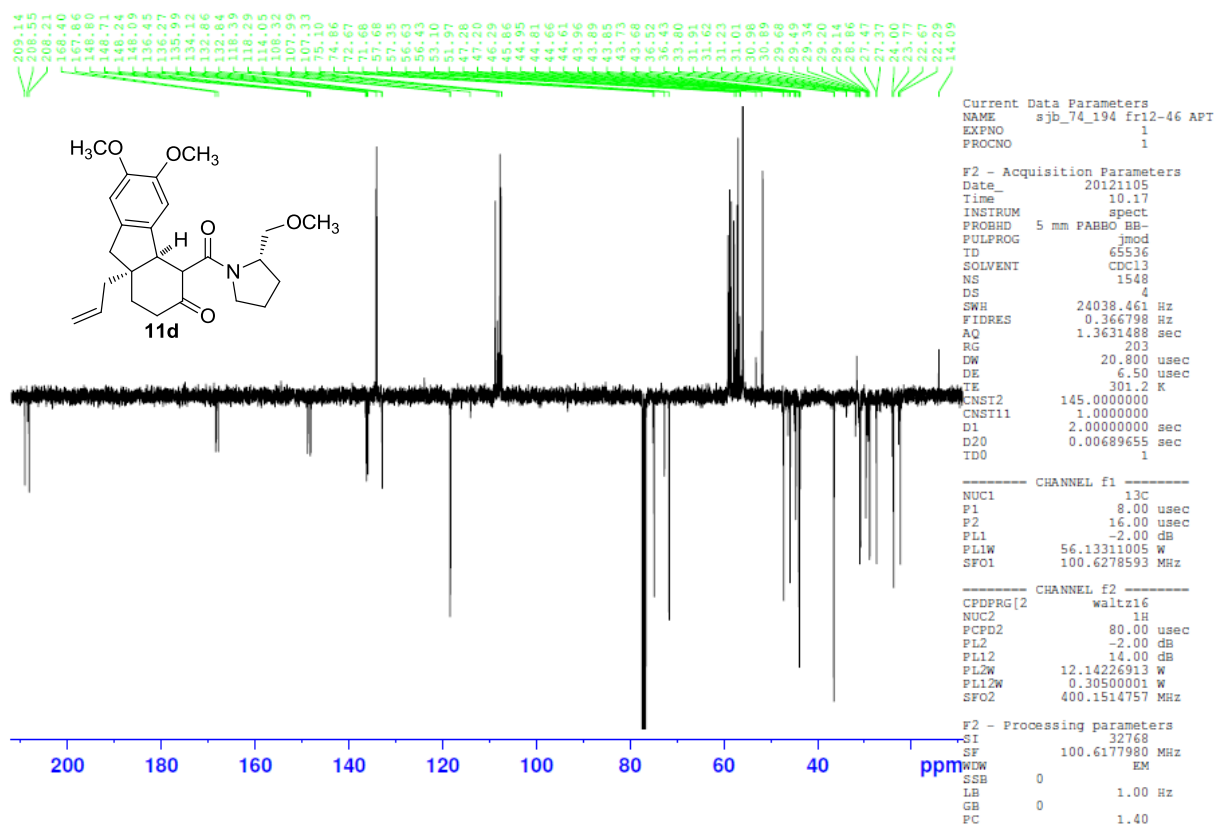

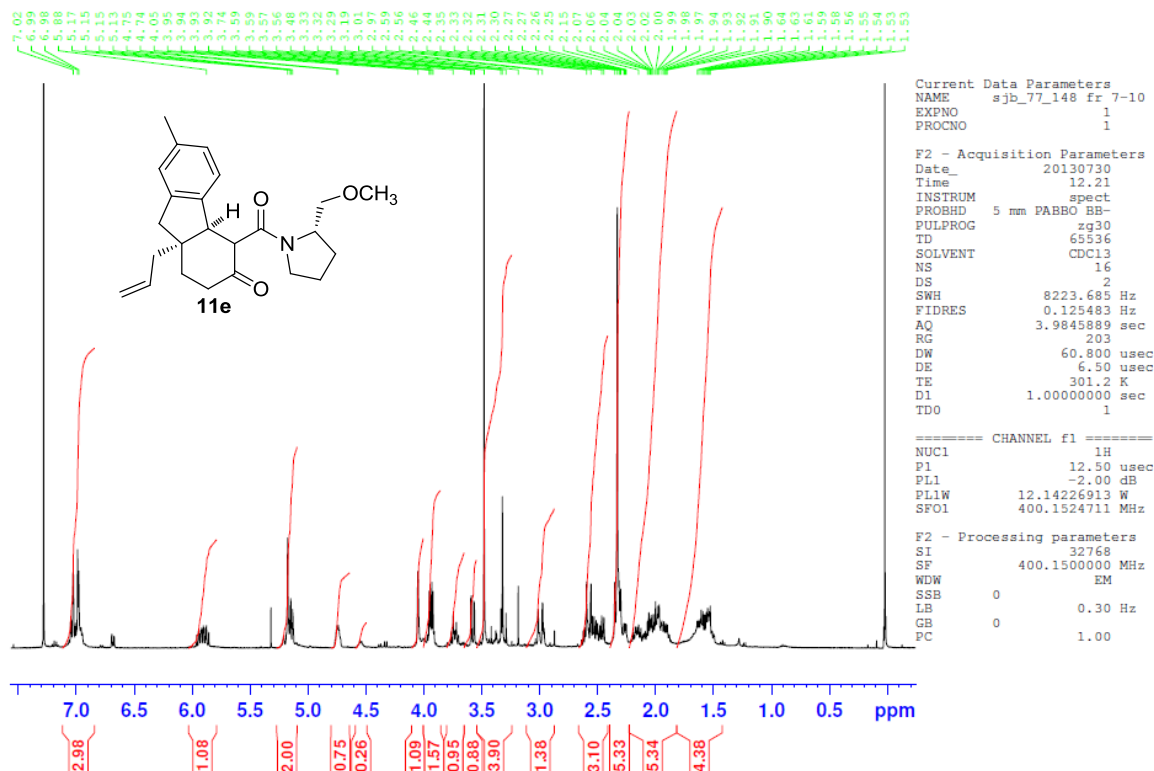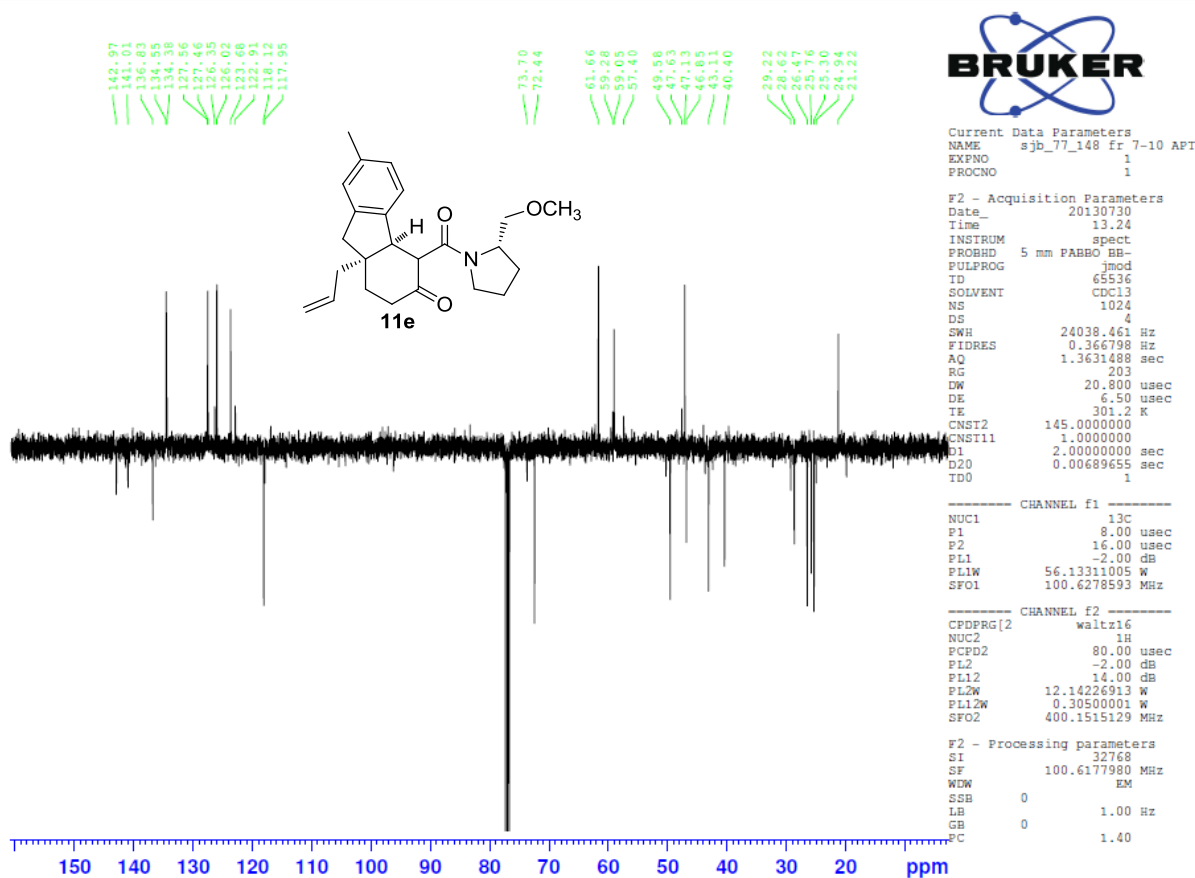

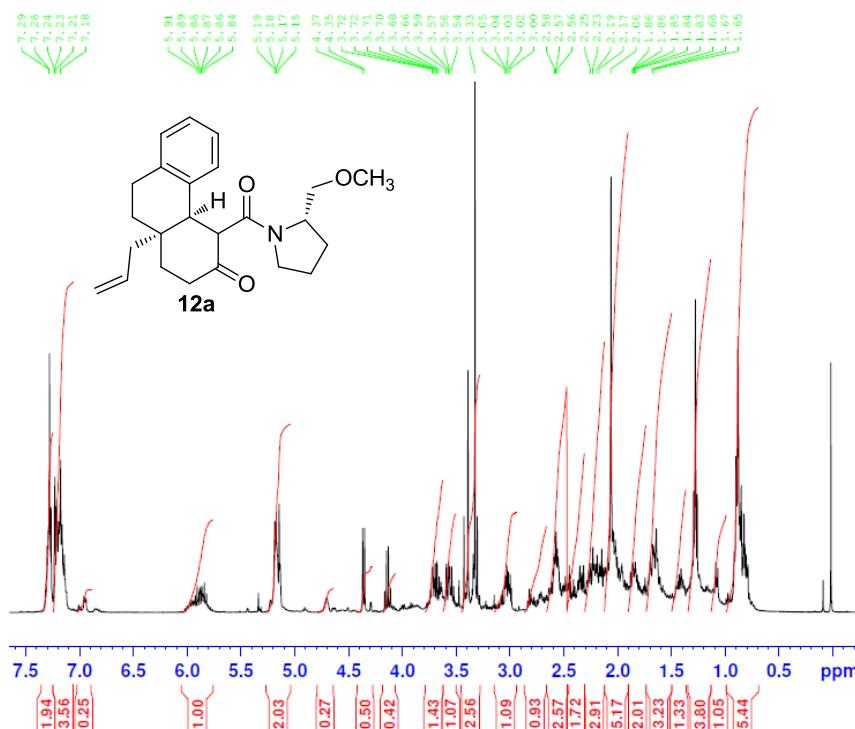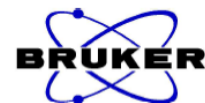

NAME sjb\_72\_077fp  
EXPNO 1  
PROCNO 1  
Date\_ 20120118  
Time 16.54  
INSTRUM spect  
PROBHD 5 mm PABBO BB-  
PULPROG zg30  
TD 65536  
SOLVENT CDCl3  
NS 16  
DS 2  
SWH 8223.685 Hz  
FIDRES 0.125483 Hz  
AQ 3.9846387 sec  
RG 101  
DW 60.800 usec  
DE 6.50 usec  
TE 297.1 K  
D1 1.00000000 sec  
TD0 1

===== CHANNEL f1 =====  
NUC1 1H  
P1 12.50 usec  
PL1 -2.00 dB  
PL1W 12.14226913 W  
SFO1 400.1524711 MHz  
SI 32768  
SF 400.1500000 MHz  
WDW EM  
SSB 0  
LB 0.30 Hz  
GB 0  
PC 1.00

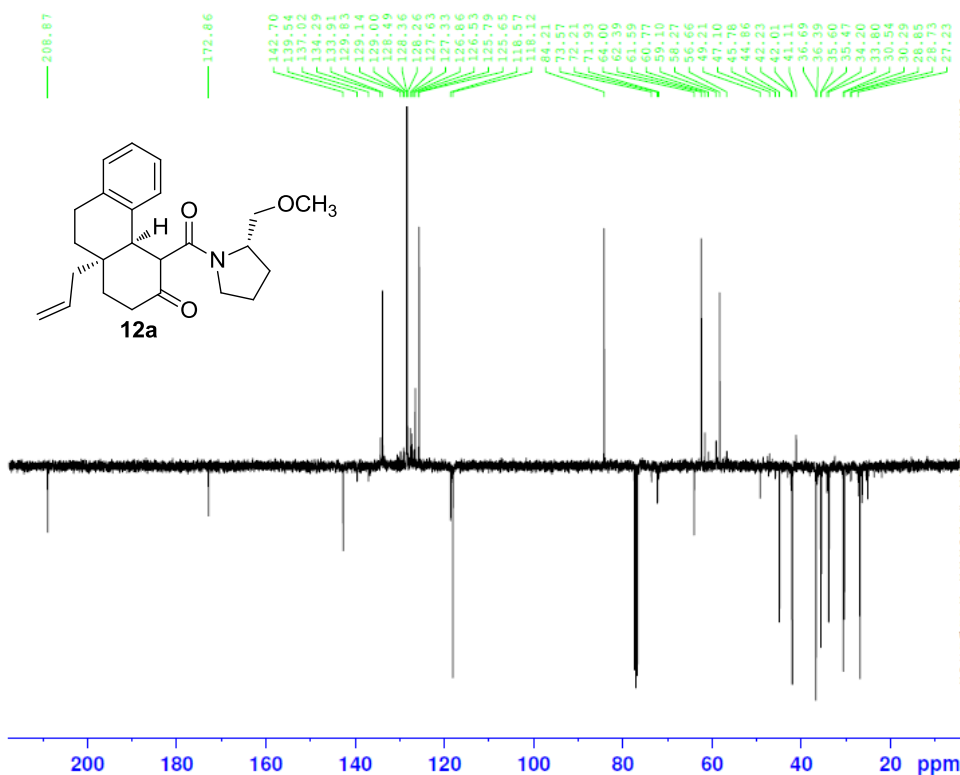

Current Data Parameters  
NAME sjb\_210 FC 666 phenyl APT 2  
EXPNO 1  
PROCNO 1

F2 - Acquisition Parameters  
Date\_ 20140325  
Time 19.35  
INSTRUM spect  
PROBHD 5 mm PABBO BB-  
PULPROG jmod  
TD 65536  
SOLVENT CDCl3  
NS 512  
DS 4  
SWH 24038.461 Hz  
FIDRES 0.366798 Hz  
AQ 1.3631488 sec  
RG 203  
DW 20.800 usec  
DE 6.50 usec  
TE 301.2 K  
CNST2 145.0000000  
CNST11 1.0000000  
D1 2.00000000 sec  
D20 0.00689655 sec  
TD0 1

===== CHANNEL f1 =====  
SFO1 100.6278593 MHz  
NUC1 13C  
P1 8.00 usec  
P2 16.00 usec  
PLW1 56.13299942 W

===== CHANNEL f2 =====  
SFO2 400.1516006 MHz  
NUC2 1H  
CPOPC[2] waltz16  
PCPD2 90.00 usec  
PLW2 12.14200020 W  
PLW12 0.24369000 W

F2 - Processing parameters  
SI 32768  
SF 100.6177980 MHz  
WDW EM  
SSB 0  
LB 1.00 Hz  
GB 0  
PC 1.40



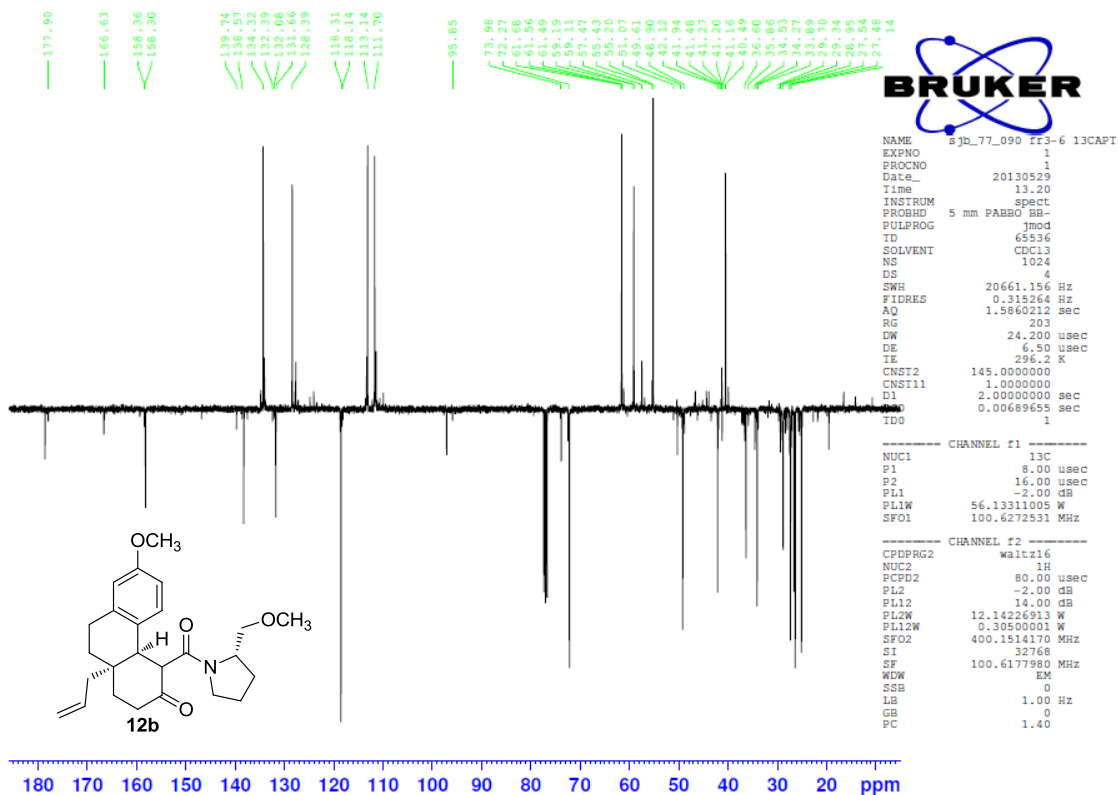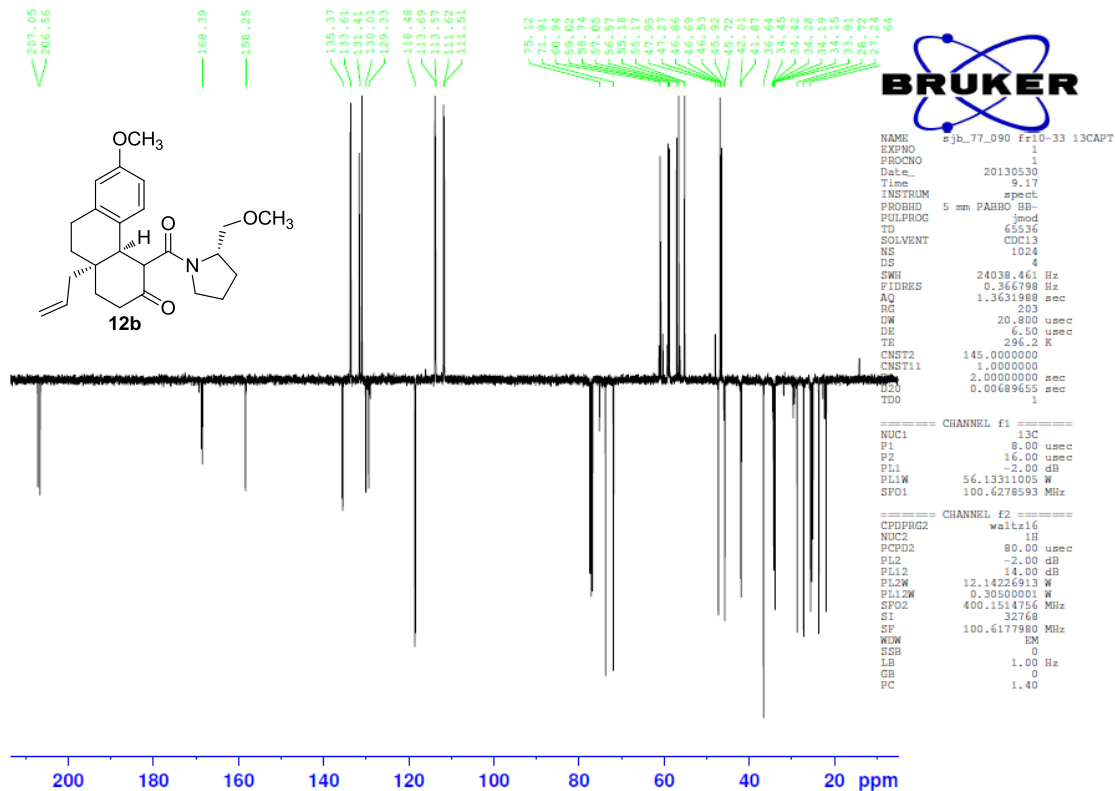

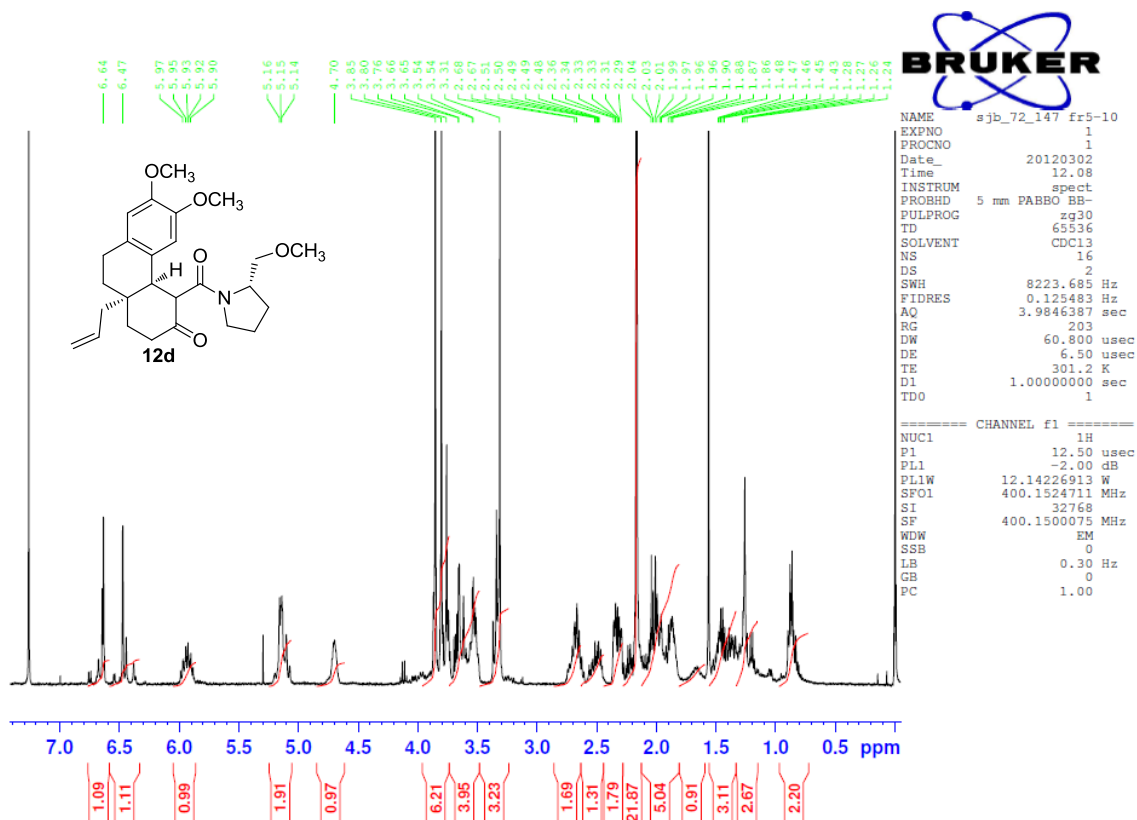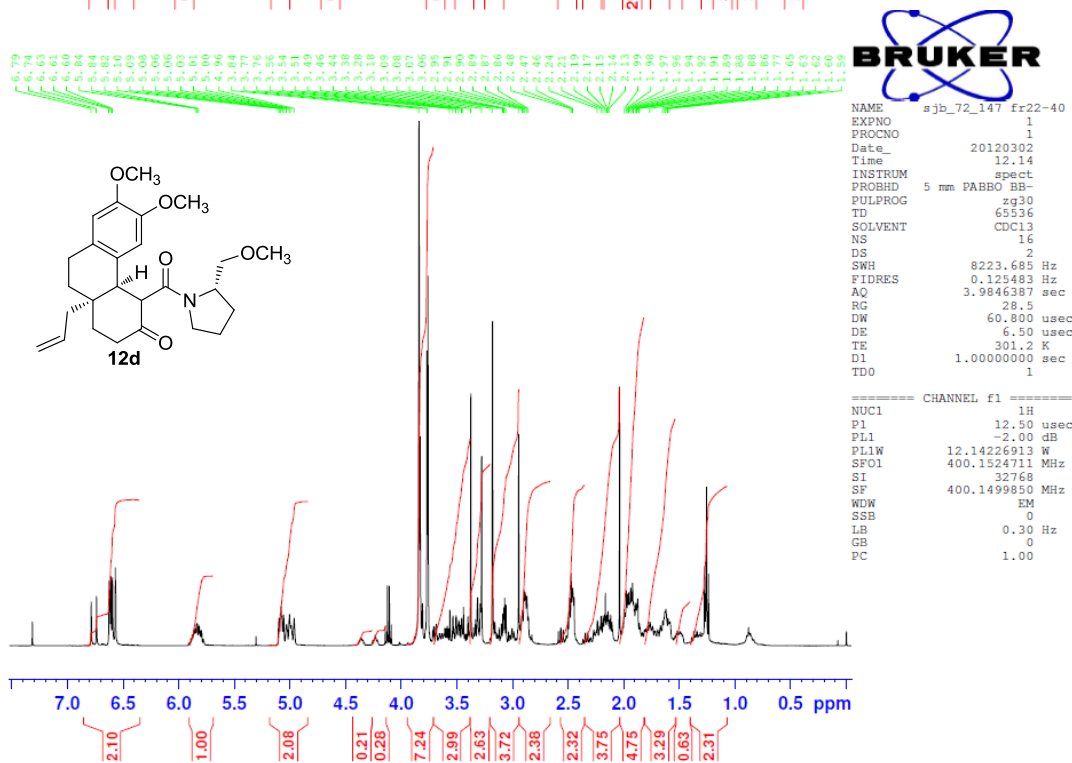

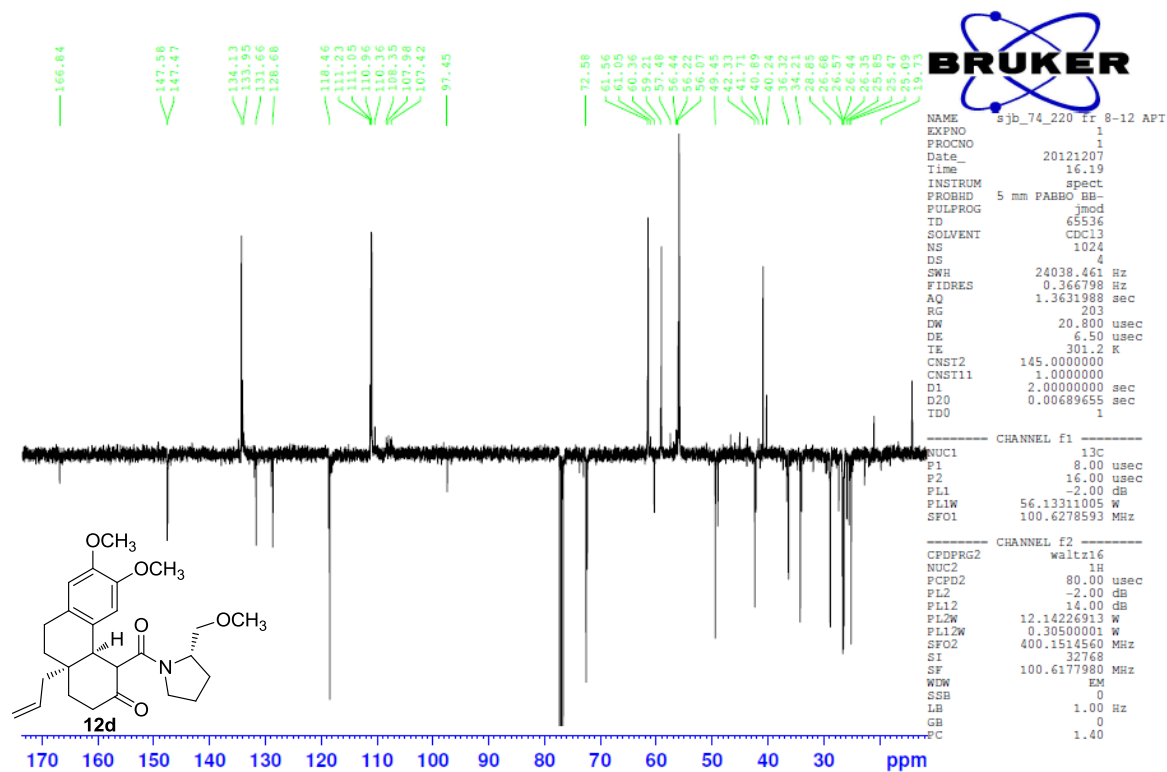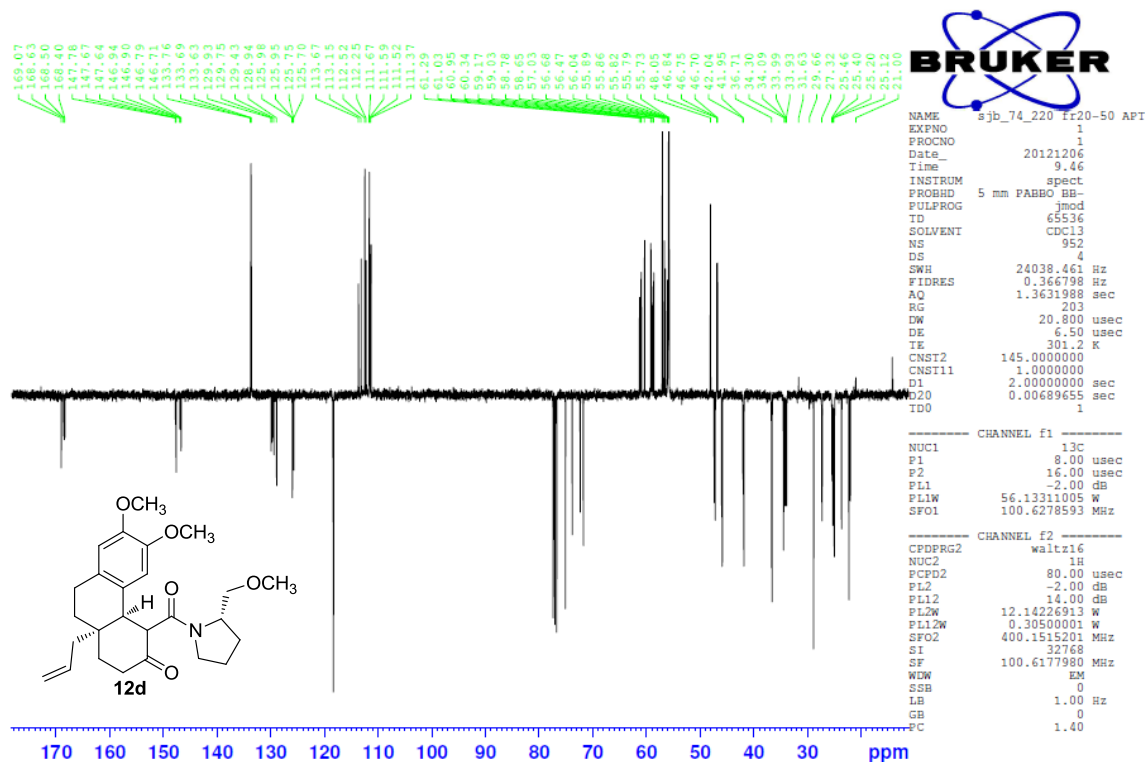

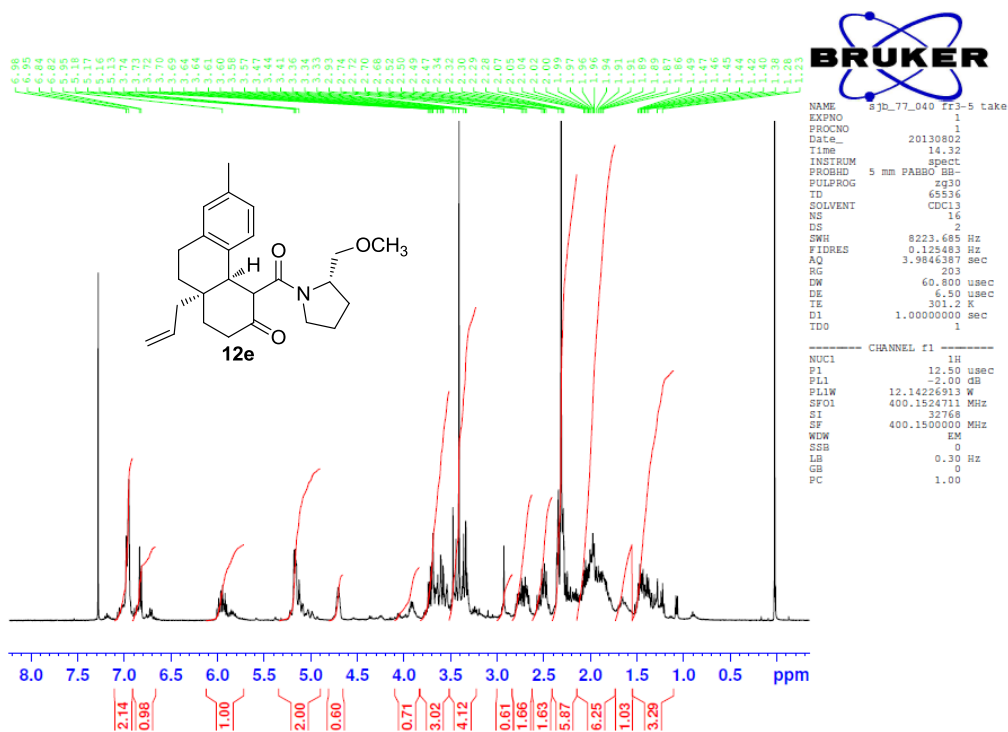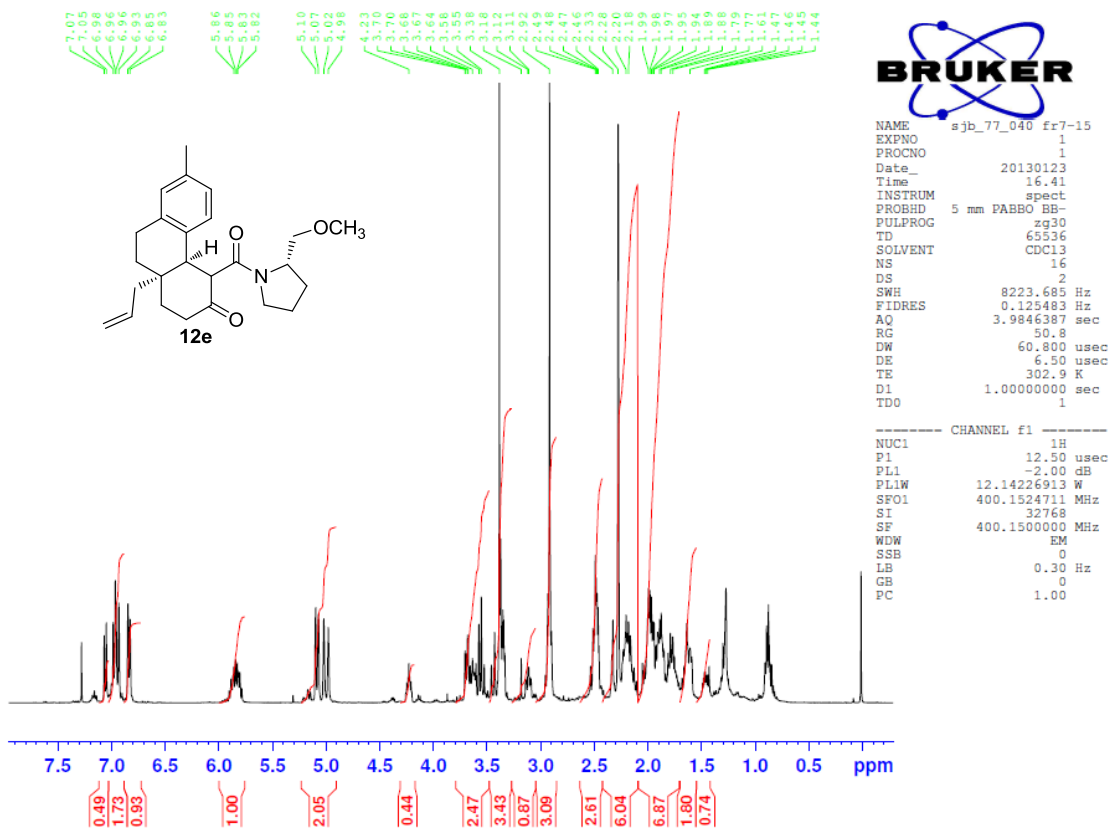

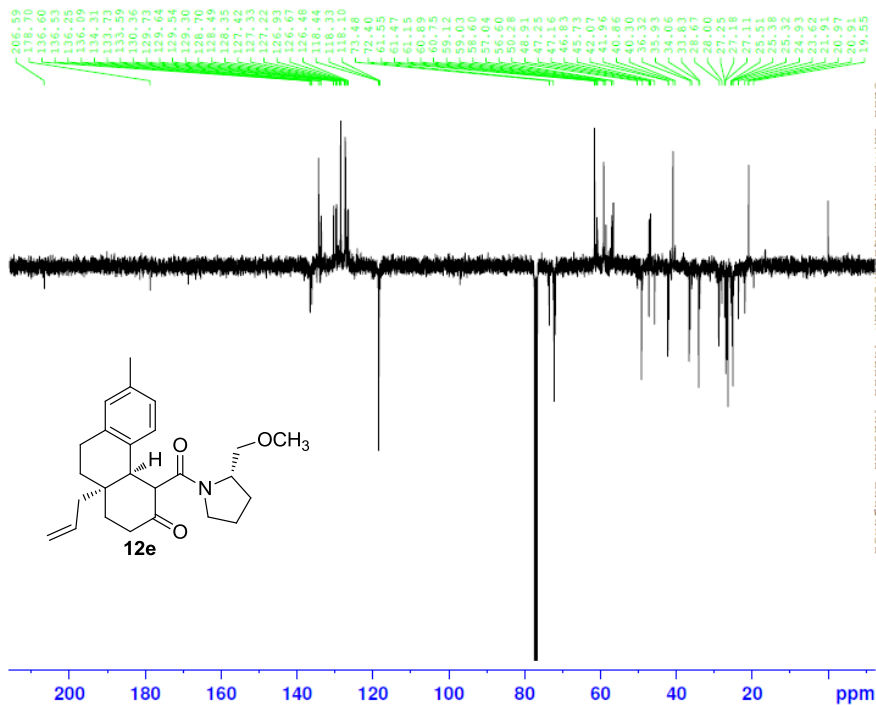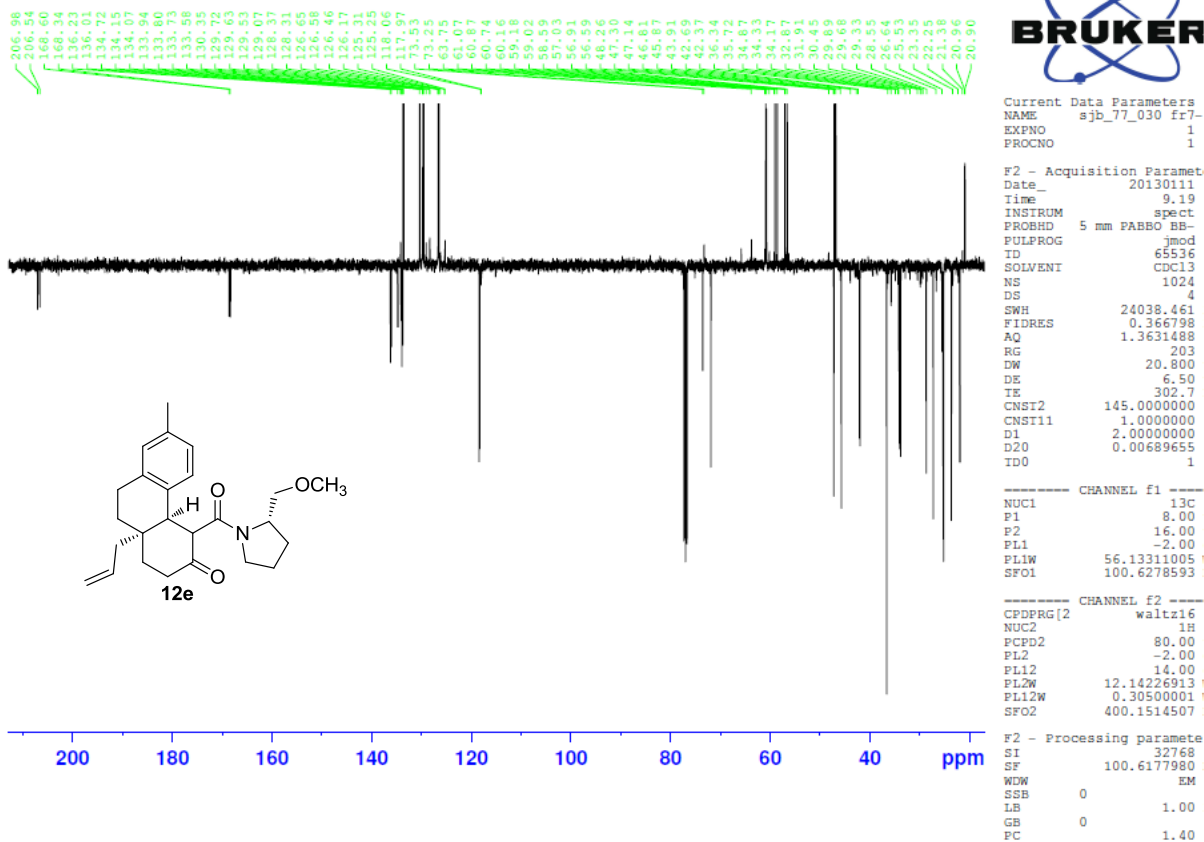

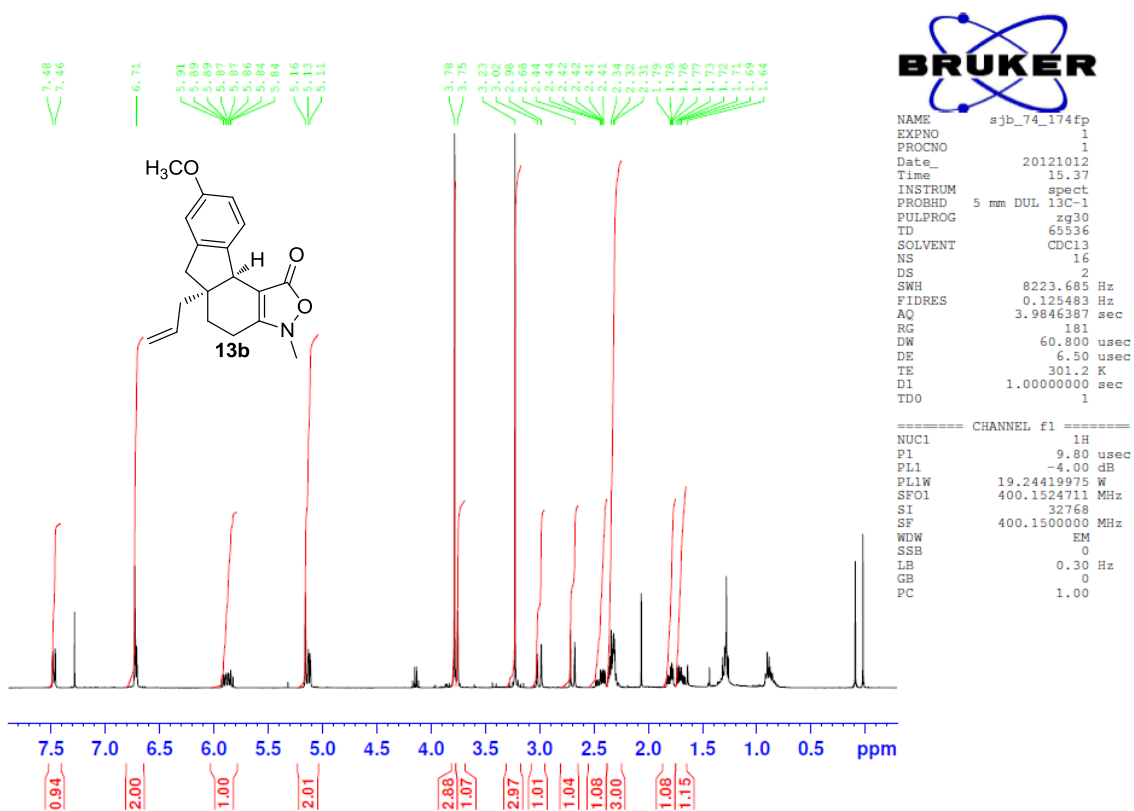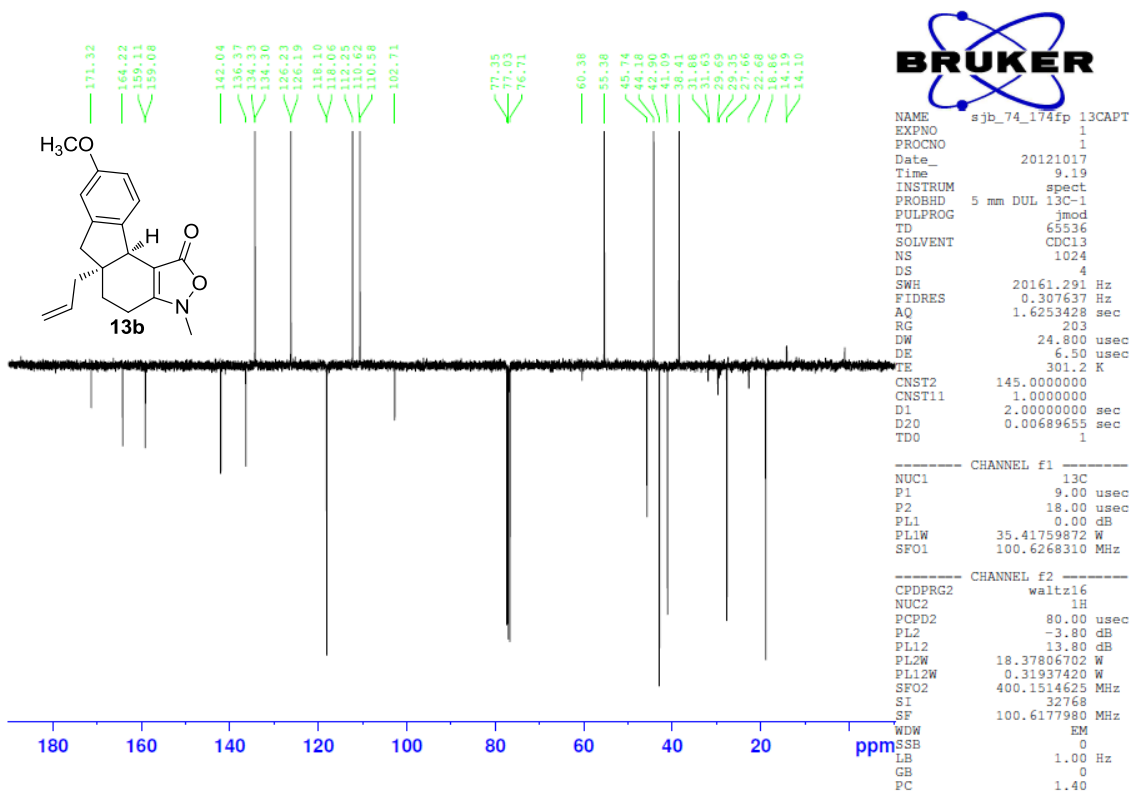

# Area Percent Report

Data Path : C:\msdchem\1\DATA\  
 Data File : sjb\_74\_174fp.D  
 Acq On : 12 Oct 2012 15:09  
 Operator : sjb  
 Sample : sjb\_74\_174fp  
 Misc :  
 ALS Vial : 85 Sample Multiplier: 1

Integration Parameters: autoint1.e  
 Integrator: ChemStation

Method : C:\msdchem\1\METHODS\JMB2.m  
 Title :

Signal : TIC: sjb\_74\_174fp.D\data.ms

| peak<br># | R.T.<br>min | first<br>scan | max<br>scan | last<br>scan | PK<br>TY | peak<br>height | corr.<br>area | corr.<br>% max. | % of<br>total |
|-----------|-------------|---------------|-------------|--------------|----------|----------------|---------------|-----------------|---------------|
| 1         | 12.202      | 1316          | 1332        | 1344         | BV 5     | 600471         | 23119397      | 3.01%           | 2.924%        |
| 2         | 12.436      | 1344          | 1373        | 1479         | VB       | 17087691       | 767689587     | 100.00%         | 97.076%       |

Abundance

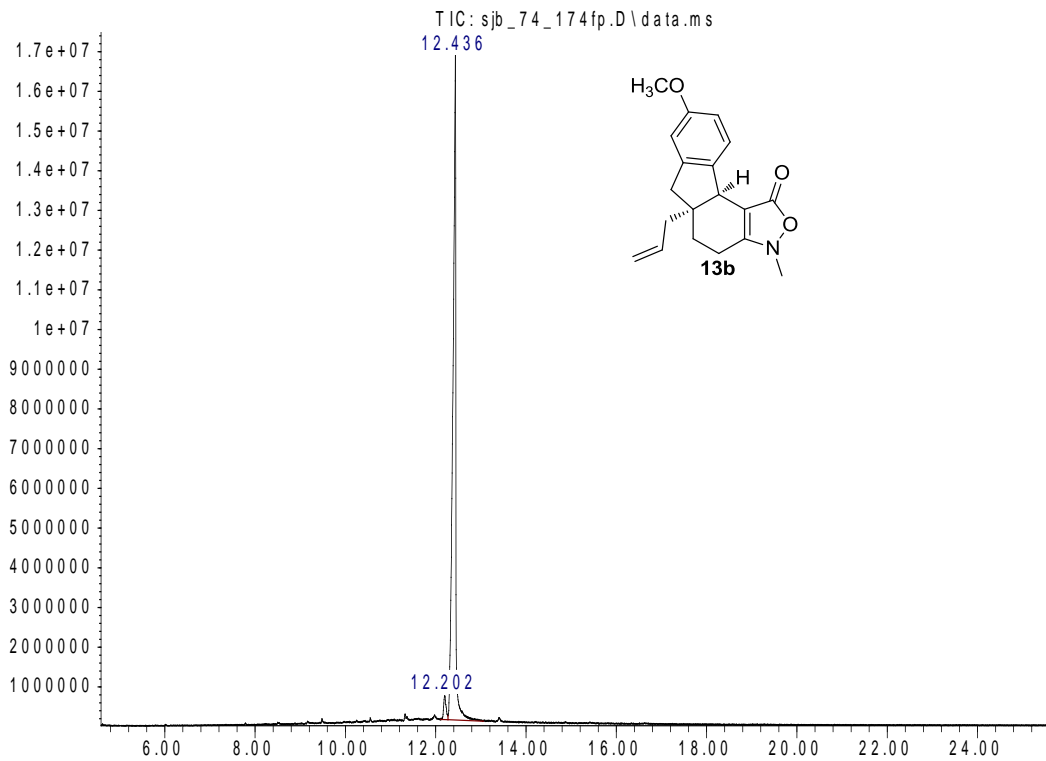

Time-->

m/z-->

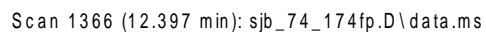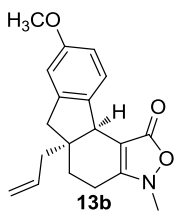

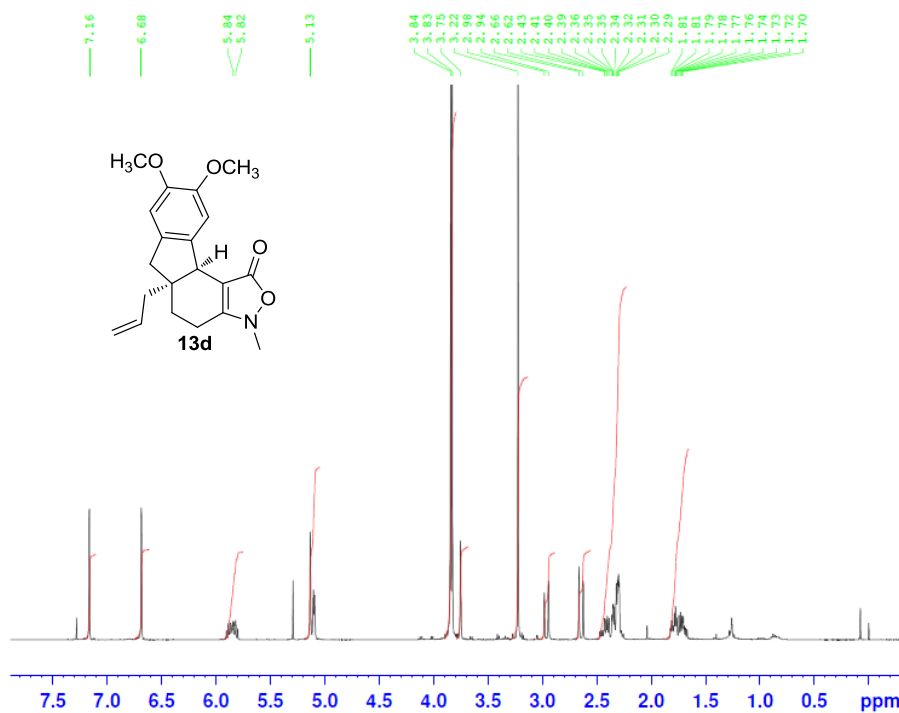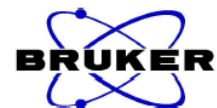

NAME sjb\_74\_171fp  
EXPNO 1  
PROCNO 1  
Date\_ 20121011  
Time 15.10  
INSTRUM spect  
PROBHD 5 mm DUL 13C-1  
PULPROG zg30  
TD 65536  
SOLVENT CDCl3  
NS 16  
DS 2  
SWH 8223.685 Hz  
FIDRES 0.125483 Hz  
AQ 3.9846387 sec  
RG 50.8  
DW 60.800 usec  
DE 6.50 usec  
TE 301.1 K  
D1 1.00000000 sec  
TD0 1

===== CHANNEL f1 =====  
NUC1 1H  
P1 9.80 usec  
PL1 -4.00 dB  
PLW 19.24419975 W  
SFO1 400.1524711 MHz  
SI 32768  
SF 400.1500000 MHz  
WDW EM  
SSB 0  
LB 0.30 Hz  
GB 0  
PC 1.00

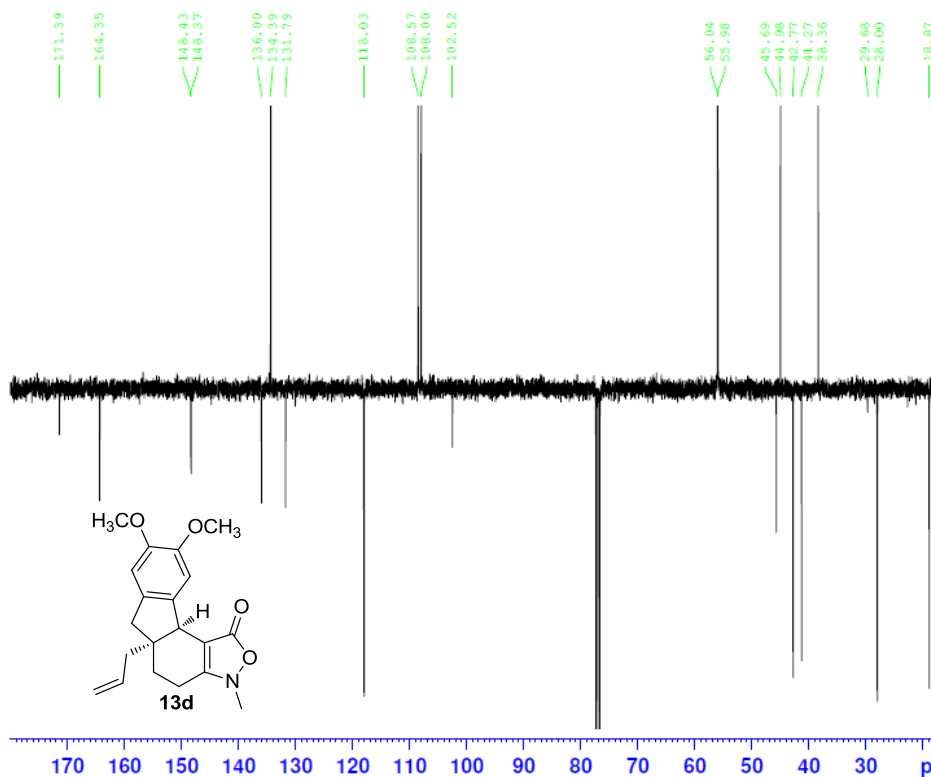

Current Data Parameters  
NAME sjb\_81\_128fp  
EXPNO 1  
PROCNO 1  
F2 - Acquisition Parameters  
Date\_ 20140325  
Time 20.07  
INSTRUM spect  
PROBHD 5 mm PABBO BB-  
PULPROG jmod  
TD 65536  
SOLVENT CDCl3  
NS 474  
DS 4  
SWH 24038.461 Hz  
FIDRES 0.366798 Hz  
AQ 1.3631488 sec  
RG 203  
DW 20.800 usec  
DE 6.50 usec  
TE 301.2 K  
CNST2 145.0000000  
CNST11 1.0000000  
D1 2.00000000 sec  
D20 0.00689655 sec  
TD0 1

===== CHANNEL f1 =====  
SFO1 100.6278593 MHz  
NUC1 13C  
P1 8.00 usec  
P2 16.00 usec  
PLW1 56.13299942 W

===== CHANNEL f2 =====  
SFO2 400.1516006 MHz  
NUC2 1H  
CPDPRG[2] waltz16  
PCPD2 90.00 usec  
PLW2 12.14200020 W  
PLW12 0.24369000 W

F2 - Processing parameters  
SI 32768  
SF 100.6177980 MHz  
WDW EM  
SSB 0  
LB 1.00 Hz  
GB 0  
PC 1.40

# Area Percent Report

Data Path : C:\msdchem\1\DATA\  
 Data File : sjb\_74\_171fp.D  
 Acq On : 11 Oct 2012 12:24  
 Operator : sjb  
 Sample : sjb\_74\_171fp  
 Misc :  
 ALS Vial : 85 Sample Multiplier: 1  
 Integration Parameters: autoint1.e  
 Integrator: ChemStation  
 Method : C:\msdchem\1\METHODS\JMB2.m  
 Title :  
 Signal : TIC: sjb\_74\_171fp.D\data.ms

| peak<br># | R.T.<br>min | first<br>scan | max<br>scan | last<br>scan | PK<br>TY | peak<br>height | corr.<br>area | corr.<br>% max. | % of<br>total |
|-----------|-------------|---------------|-------------|--------------|----------|----------------|---------------|-----------------|---------------|
| 1         | 8.918       | 753           | 758         | 764          | BV 2     | 35877          | 546275        | 0.14%           | 0.136%        |
| 2         | 10.051      | 949           | 956         | 964          | PV 6     | 33672          | 718804        | 0.18%           | 0.179%        |
| 3         | 13.207      | 1502          | 1507        | 1516         | PV 6     | 42452          | 1193281       | 0.30%           | 0.298%        |
| 4         | 13.489      | 1522          | 1557        | 1582         | PV 2     | 8446940        | 397073139     | 100.00%         | 99.067%       |
| 5         | 13.642      | 1582          | 1584        | 1587         | VV 4     | 63804          | 727438        | 0.18%           | 0.181%        |
| 6         | 13.673      | 1587          | 1589        | 1595         | VV 6     | 37292          | 555213        | 0.14%           | 0.139%        |

Sum of corrected areas: 400814149

JMB2.m Wed Oct 17 15:09:01 2012

Abundance

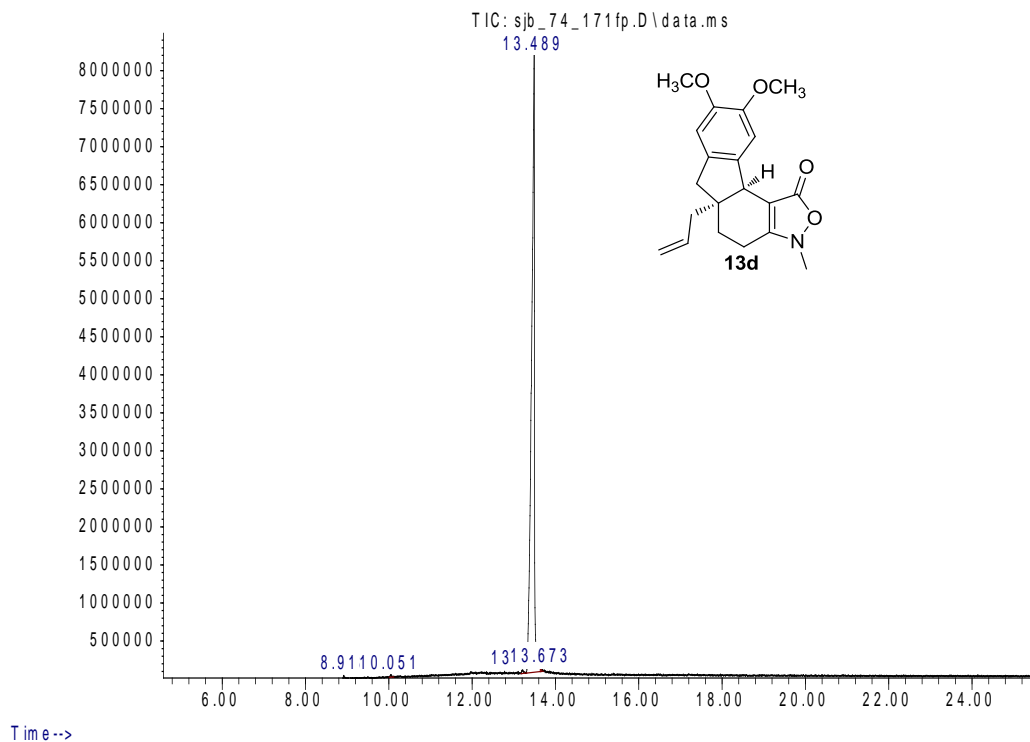

Abundance

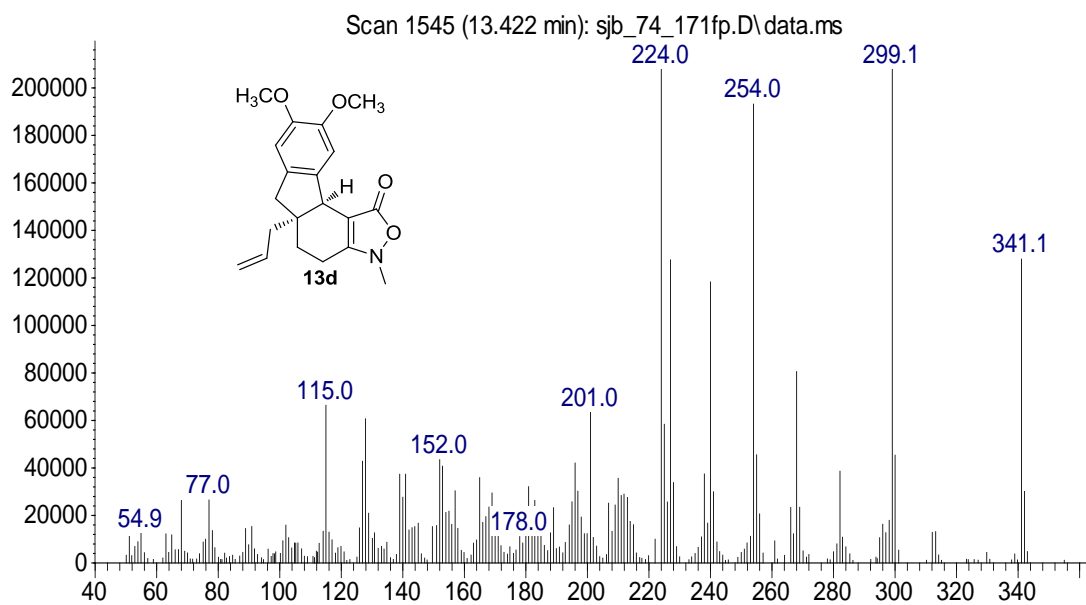

m/z-->

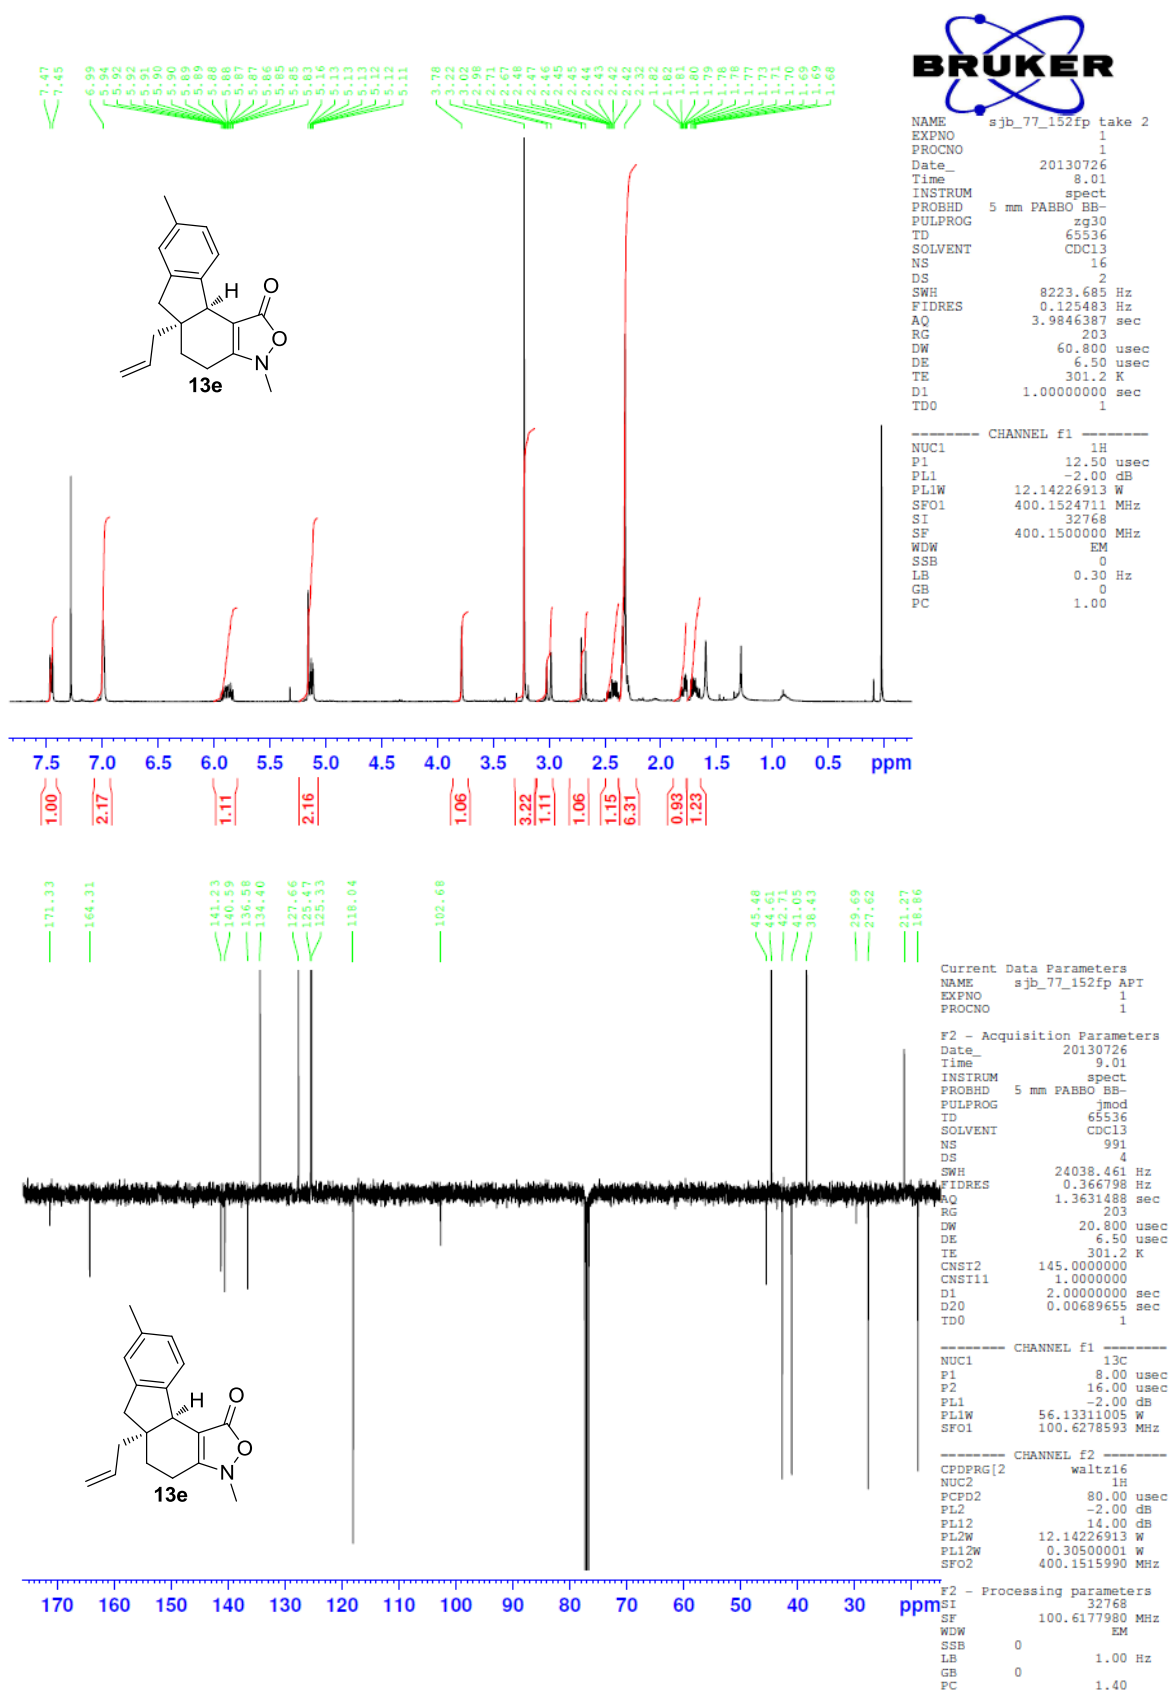

# Area Percent Report

Data Path : C:\msdchem\1\DATA\  
 Data File : sjb\_77\_152fp.D  
 Acq On : 16 Jul 2013 17:41  
 Operator : sjb  
 Sample : sjb\_77\_152fp  
 Misc :  
 ALS Vial : 85 Sample Multiplier: 1  
 Integration Parameters: autoint1.e  
 Integrator: ChemStation  
 Method : C:\msdchem\1\METHODS\ckr3.m  
 Title :

Signal : TIC: sjb\_77\_152fp.D\data.ms

| peak # | R.T. min | first scan | max scan | last scan | PK TY | peak height | corr. area | corr. % max. | % of total |
|--------|----------|------------|----------|-----------|-------|-------------|------------|--------------|------------|
| 1      | 11.207   | 1139       | 1158     | 1202      | BV    | 11463397    | 276482325  | 100.00%      | 95.401%    |
| 2      | 17.559   | 2229       | 2268     | 2297      | M5    | 248076      | 13329377   | 4.82%        | 4.599%     |

Sum of corrected areas: 289811703

ckr3.m Mon May 12 16:00:02 2014

Abundance

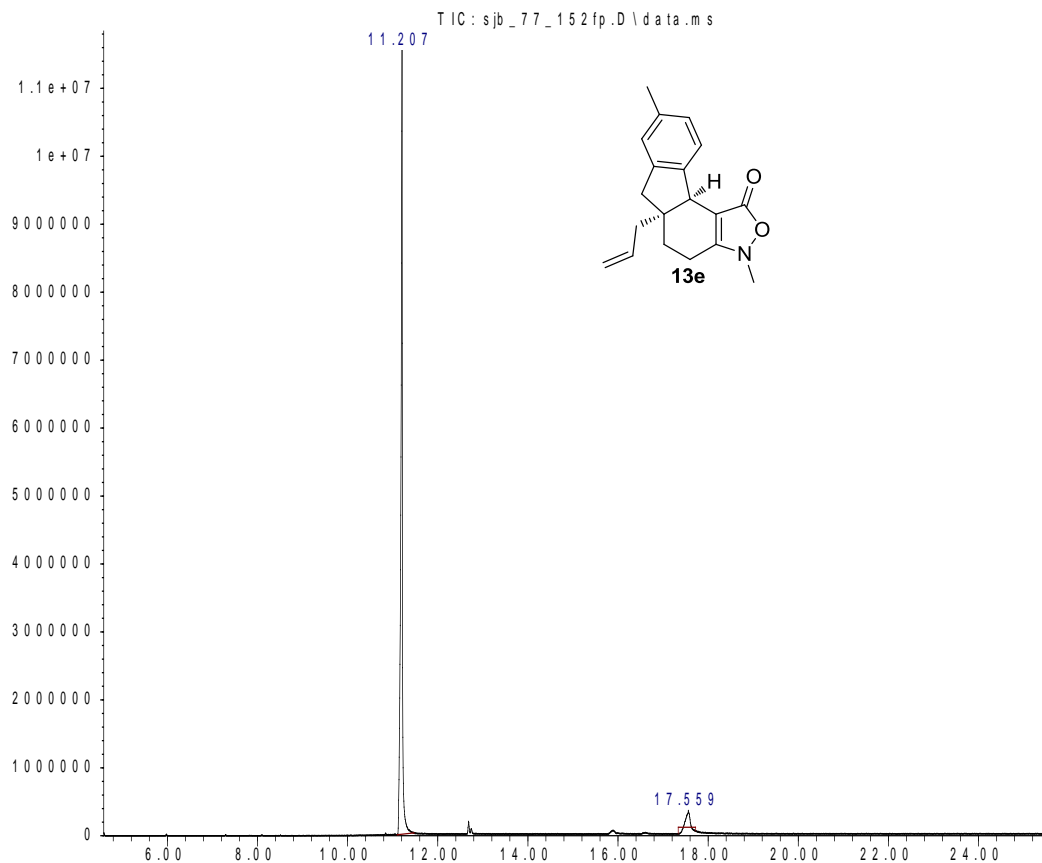

Abundance

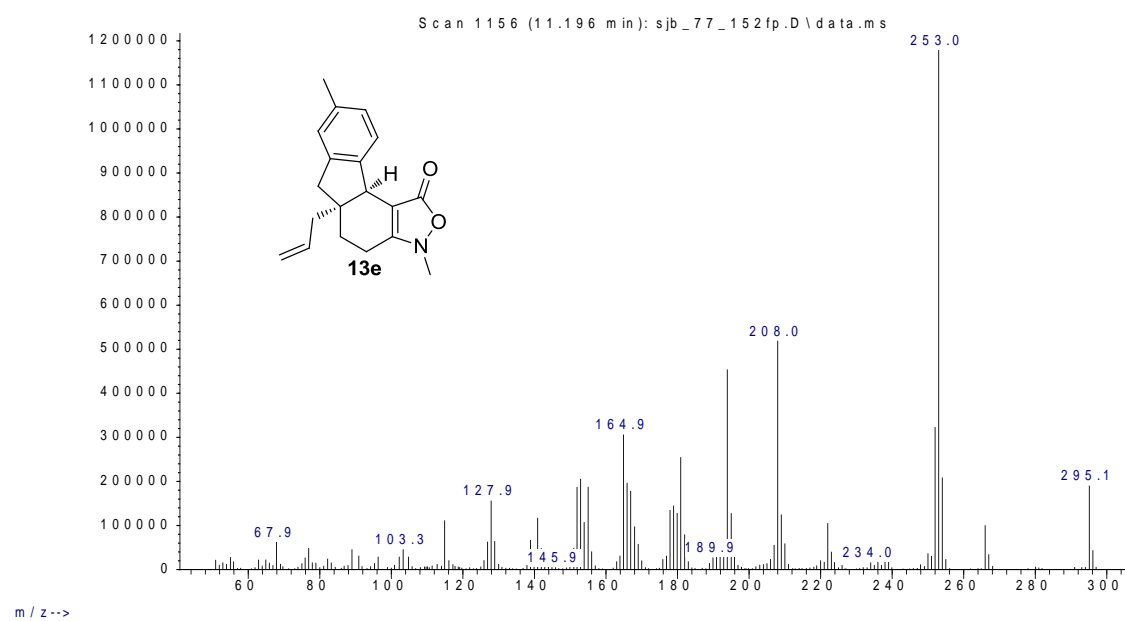

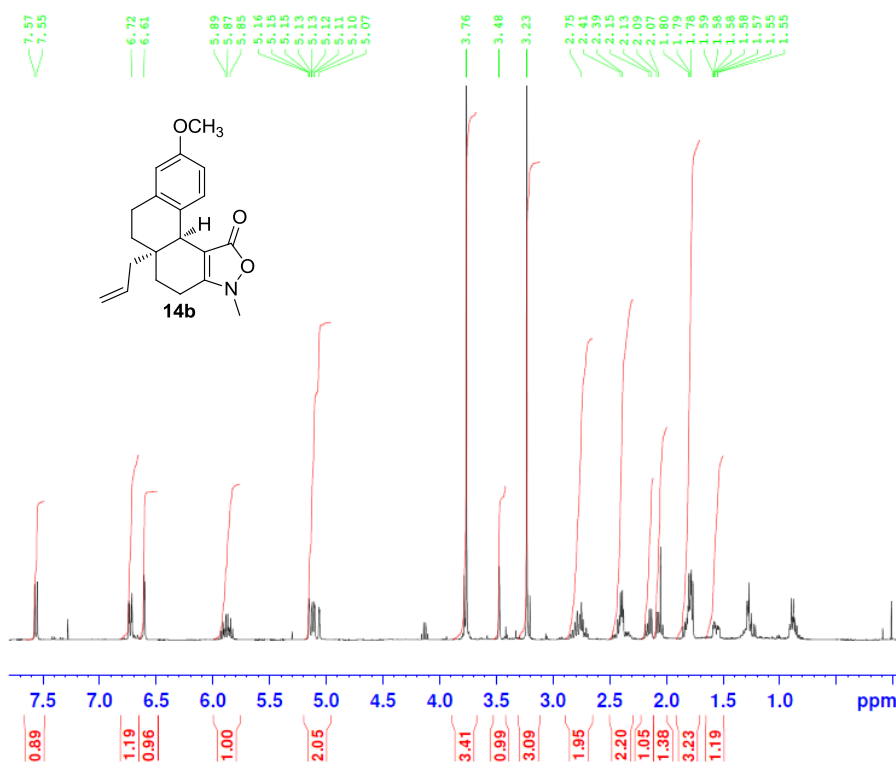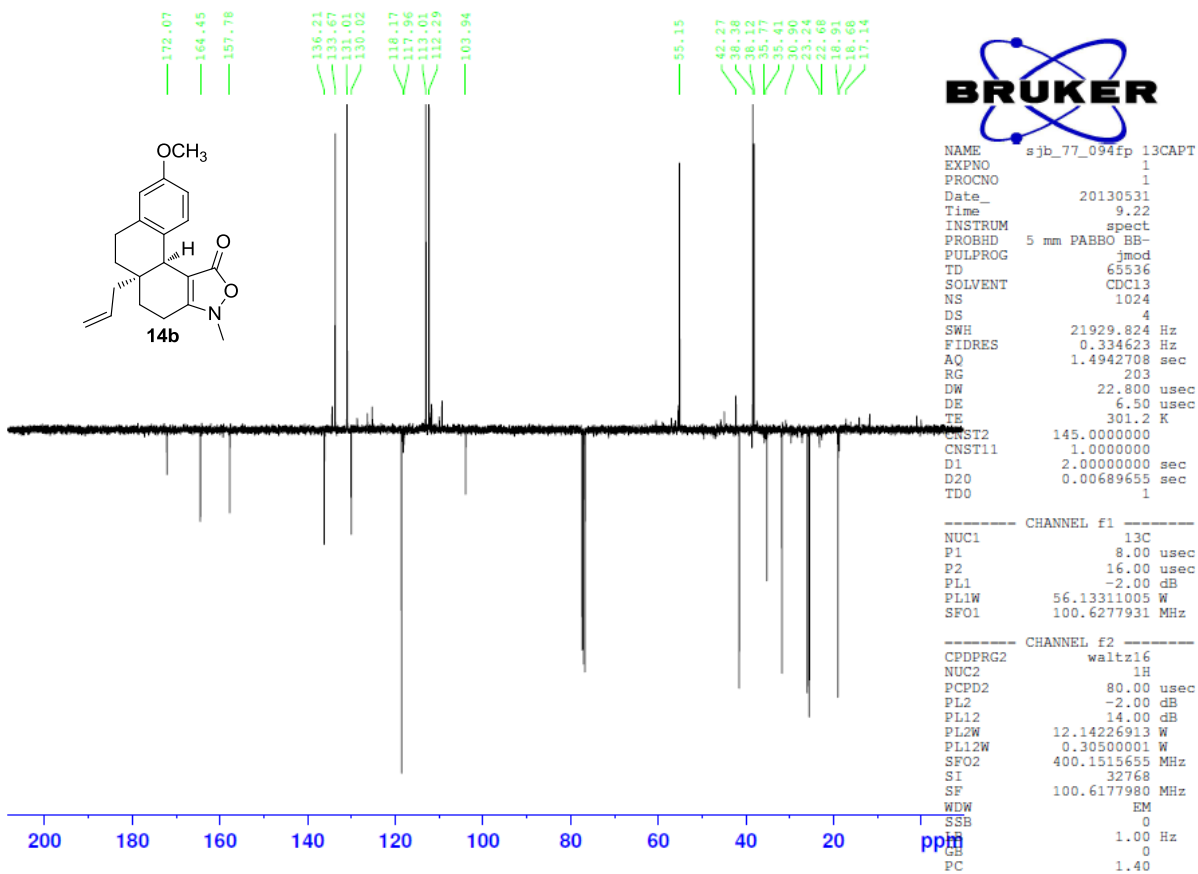

## Area Percent Report

Data Path : C:\msdchem\1\DATA\

Data File : sjb\_74\_053fp.D

Acq On : 3 Jul 2012 12:50

Operator : sjb

Sample : sjb\_74\_053fp

Misc :

ALS Vial : 100 Sample Multiplier: 1

Integration Parameters: autoint1.e

Integrator: ChemStation

Method : C:\msdchem\1\METHODS\JMB2.m

Title :

Signal : TIC: sjb\_74\_053fp.D\data.ms

| peak<br>#               | R.T.<br>min | first<br>scan | max<br>scan | last<br>scan | PK<br>TY | peak<br>height | corr.<br>area | corr.<br>% max. | % of<br>total |
|-------------------------|-------------|---------------|-------------|--------------|----------|----------------|---------------|-----------------|---------------|
| 1                       | 9.694       | 882           | 894         | 912          | BB       | 34783          | 1341908       | 2.20%           | 2.098%        |
| 2                       | 12.674      | 1367          | 1414        | 1420         | BV       | 87897          | 861272        | 1.42%           | 1.346%        |
| 3                       | 13.087      | 1474          | 1487        | 1498         | BV 4     | 45615          | 902735        | 1.48%           | 1.411%        |
| 4                       | 13.877      | 1595          | 1625        | 1647         | PV 2     | 1452537        | 60865753      | 100.00%         | 95.145%       |
| Sum of corrected areas: |             |               |             |              |          |                | 63971668      |                 |               |

JMB2.m Wed Oct 17 15:30:37 2012

Abundance

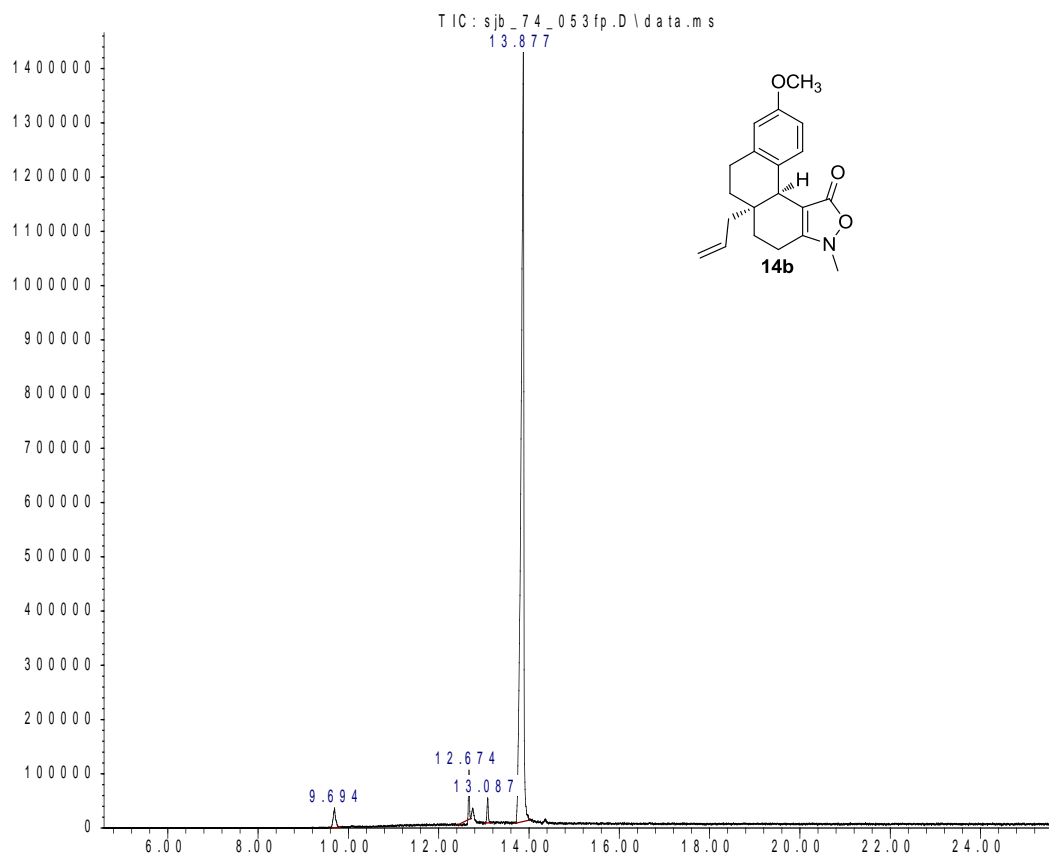

Time--&gt;

Abundance

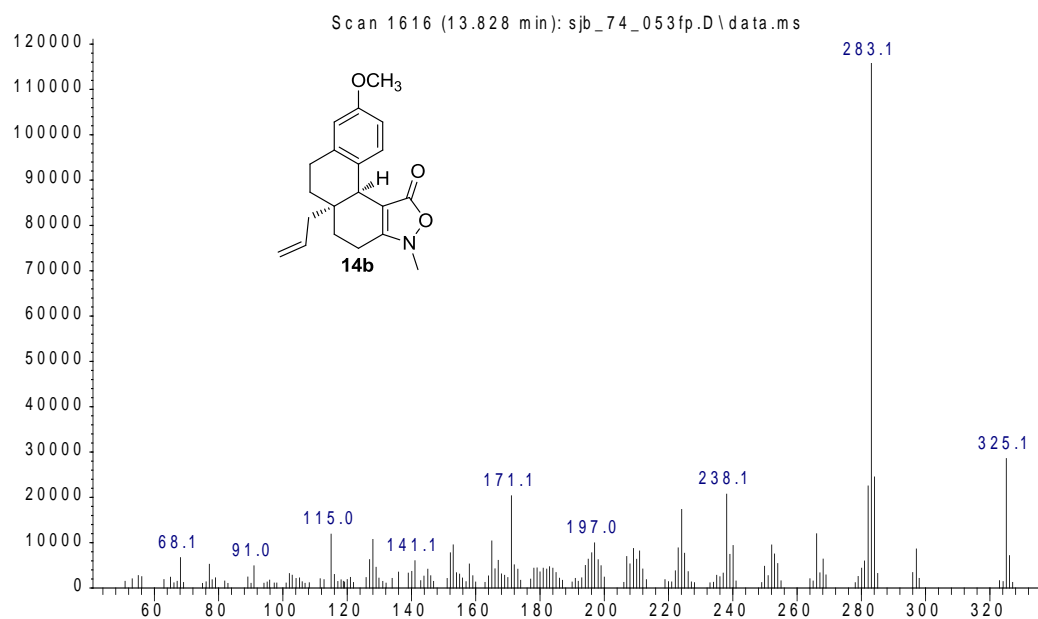

m/z-->

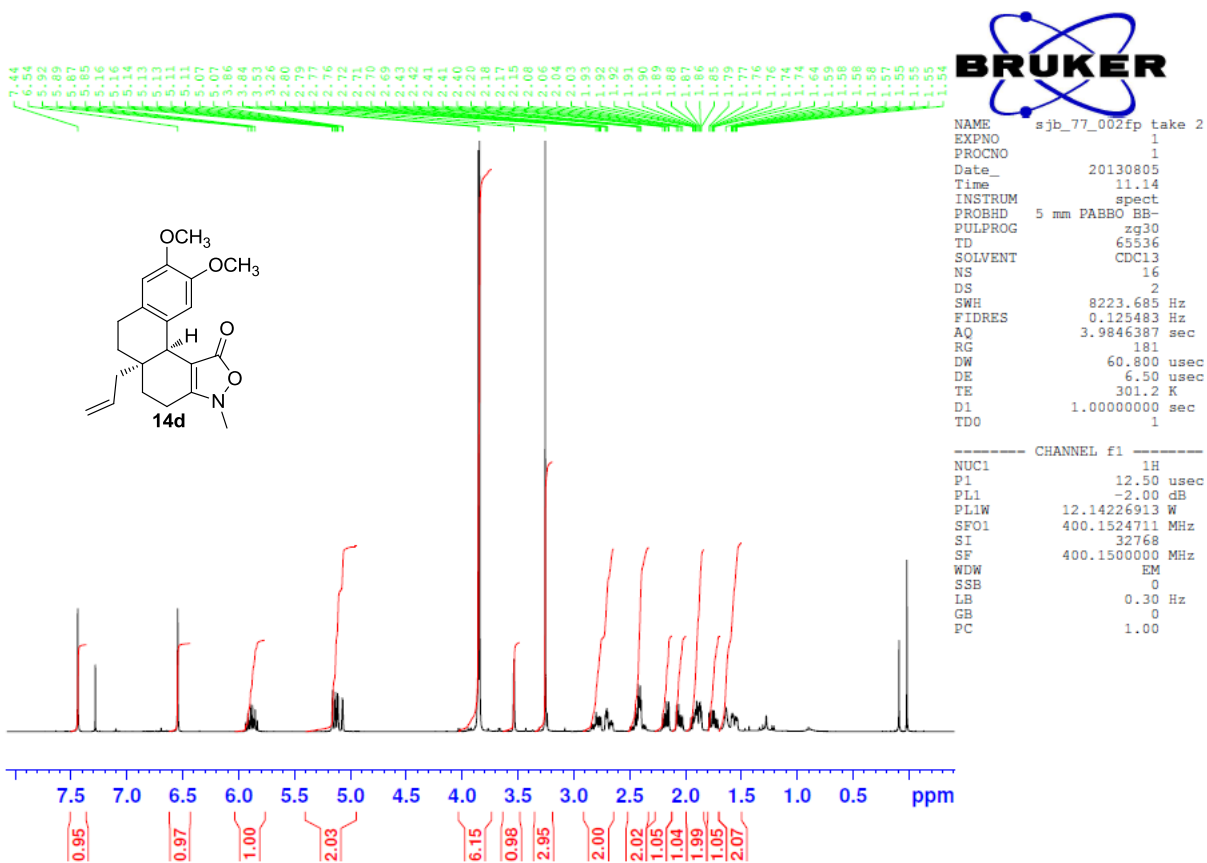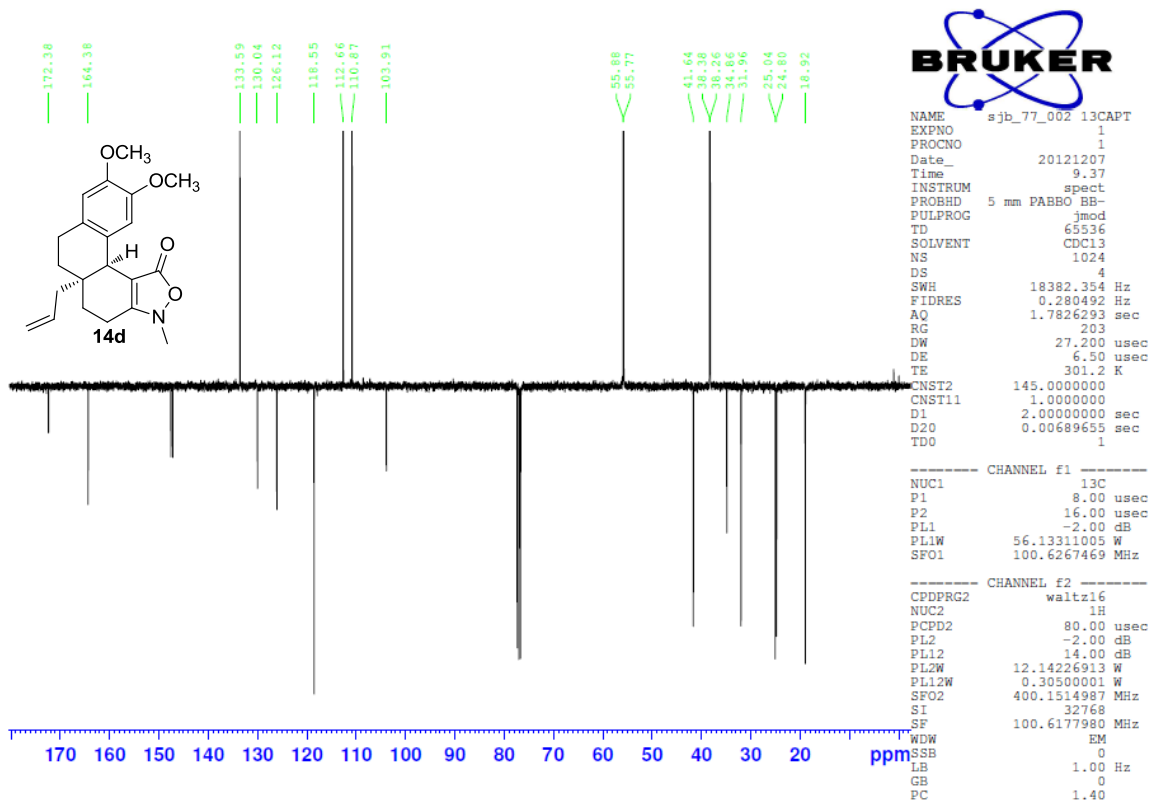

# Area Percent Report

Data Path : C:\msdchem\1\DATA\  
 Data File : sjb\_72\_195fp.D  
 Acq On : 1 May 2012 17:23  
 Operator : sjb  
 Sample : sjb\_72\_195fp  
 Misc :  
 ALS Vial : 45 Sample Multiplier: 1

Integration Parameters: autoint1.e  
 Integrator: ChemStation

Method : C:\msdchem\1\METHODS\JMB2.m  
 Title :

Signal : TIC: sjb\_72\_195fp.D\data.ms

| peak<br># | R.T.<br>min | first<br>scan | max<br>scan | last<br>scan | PK<br>TY | peak<br>height | corr.<br>area | corr.<br>% max. | % of<br>total |
|-----------|-------------|---------------|-------------|--------------|----------|----------------|---------------|-----------------|---------------|
| 1         | 13.743      | 1587          | 1601        | 1616         | PV 9     | 232062         | 6716431       | 2.01%           | 1.928%        |
| 2         | 13.839      | 1616          | 1618        | 1624         | VV 6     | 23517          | 354612        | 0.11%           | 0.102%        |
| 3         | 14.267      | 1683          | 1693        | 1708         | PV 6     | 188248         | 5335080       | 1.59%           | 1.531%        |
| 4         | 15.234      | 1817          | 1862        | 1912         | PV       | 5381726        | 334739484     | 100.00%         | 96.071%       |
| 5         | 15.673      | 1921          | 1938        | 1951         | PV 10    | 40476          | 1284013       | 0.38%           | 0.369%        |

Sum of corrected areas: 348429620

Abundance

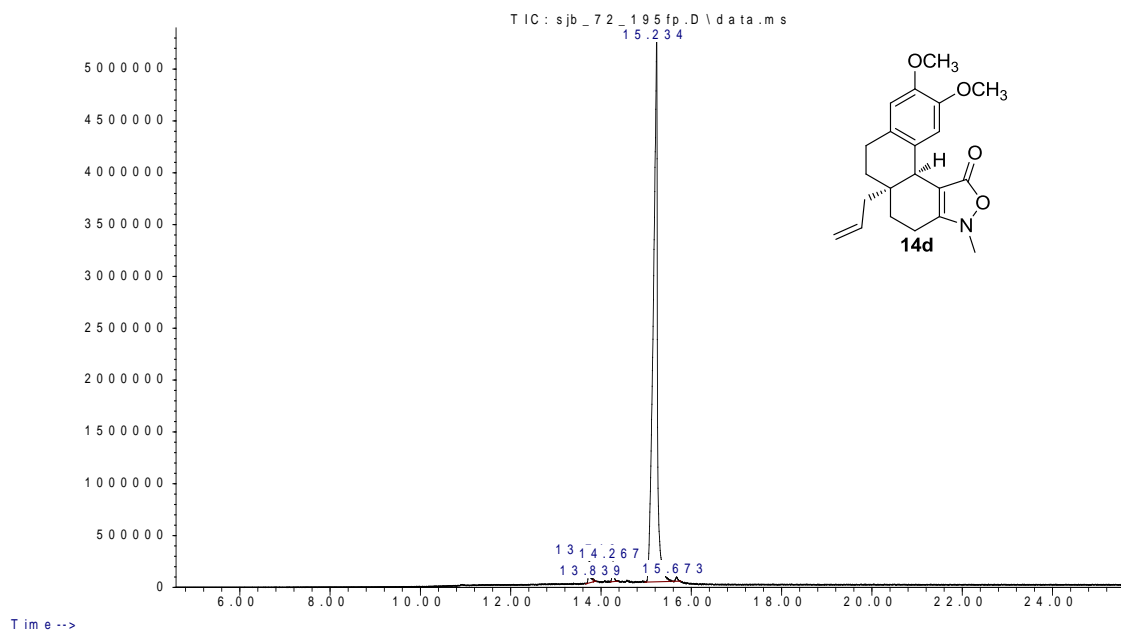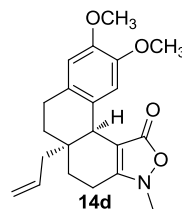

Abundance

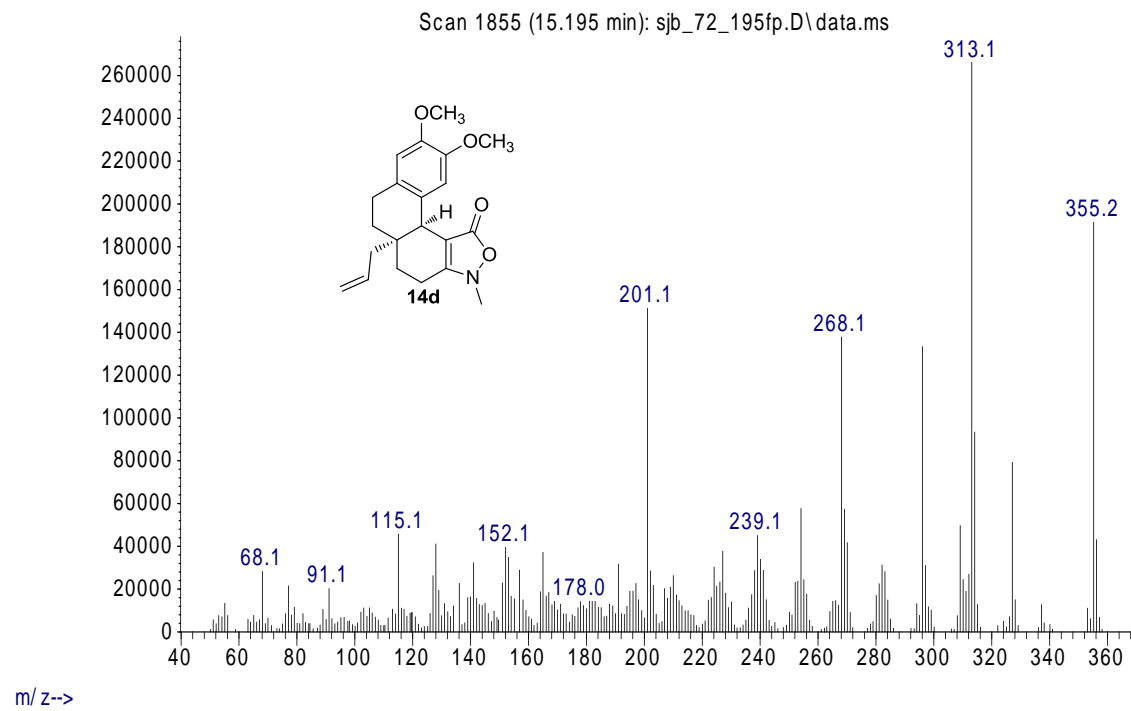

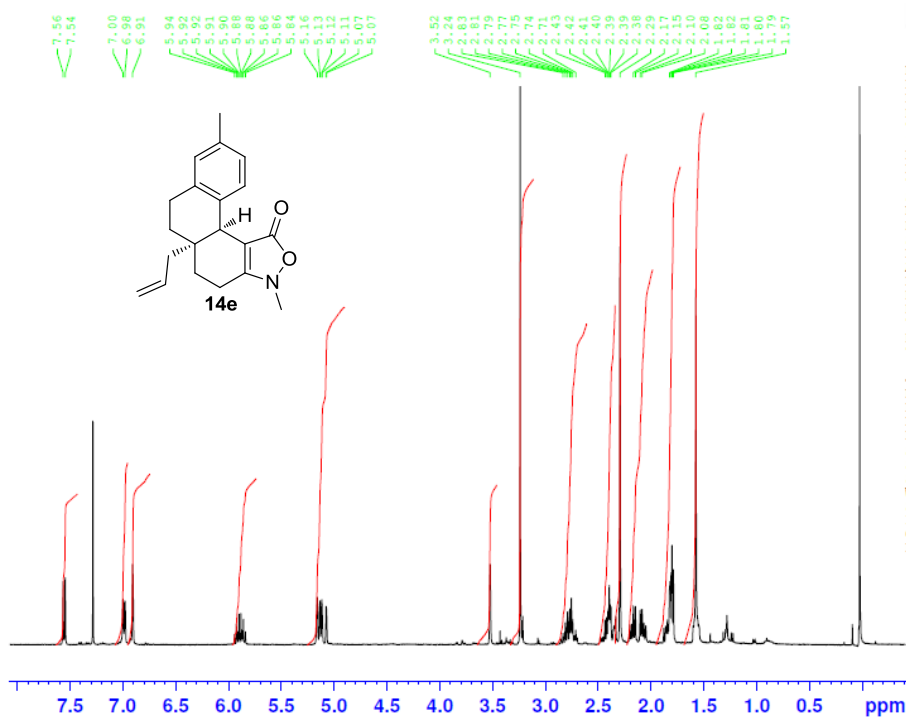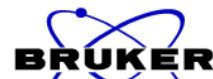

NAME sjb\_77\_041fp take 2  
 EXPNO 1  
 PROCNO 1  
 Date\_ 20130802  
 Time 14.24  
 INSTRUM spect  
 PROBHD 5 mm PABBO BB-  
 PULPROG zg30  
 TD 65536  
 SOLVENT CDCl3  
 NS 16  
 DS 2  
 SWH 8223.685 Hz  
 FIDRES 0.125483 Hz  
 AQ 3.9846387 sec  
 RG 203  
 DW 60.800 usec  
 DE 6.50 usec  
 TE 301.2 K  
 D1 1.00000000 sec  
 TDO 1

----- CHANNEL f1 -----  
 NUC1 1H  
 P1 12.50 usec  
 PL1 -2.00 dB  
 PL1W 12.14226913 W  
 SFO1 400.1524711 MHz  
 SI 32768  
 SF 400.1500000 MHz  
 WDW EM  
 SSB 0  
 LB 0.30 Hz  
 GB 0  
 PC 1.00

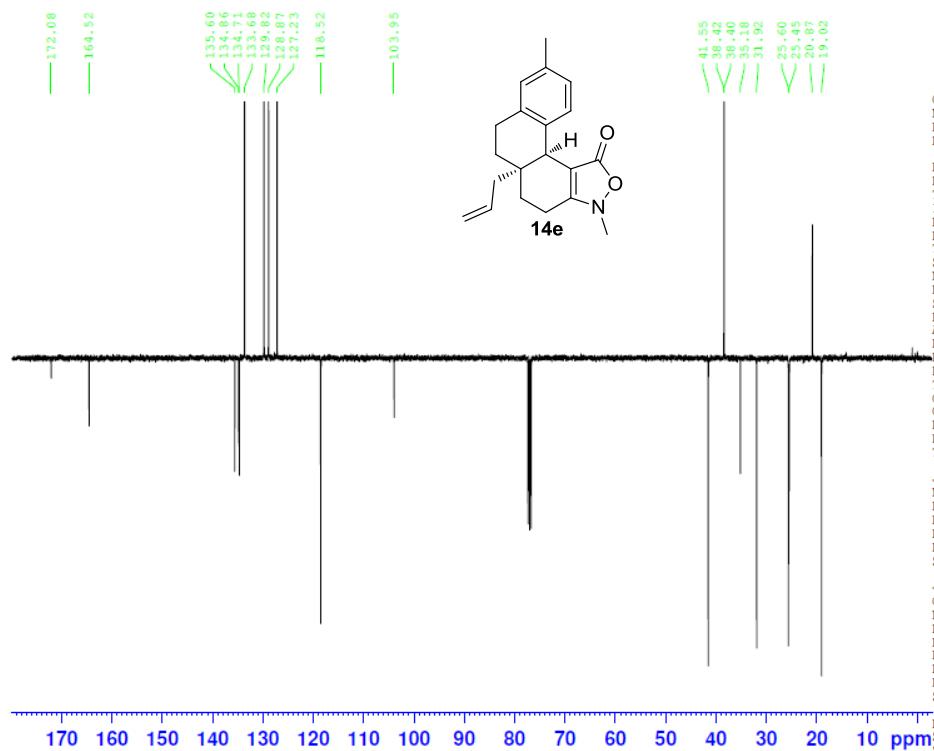

Current Data Parameters  
 NAME sjb\_77\_032fp APT  
 EXPNO 1  
 PROCNO 1  
 F2 - Acquisition Parameters  
 Date\_ 20130115  
 Time 13.42  
 INSTRUM spect  
 PROBHD 5 mm PABBO BB-  
 PULPROG jmod  
 TD 65536  
 SOLVENT CDCl3  
 NS 1024  
 DS 4  
 SWH 18382.354 Hz  
 FIDRES 0.280492 Hz  
 AQ 1.7825792 sec  
 RG 203  
 DW 27.200 usec  
 DE 6.50 usec  
 TE 299.5 K  
 CNST2 145.0000000  
 CNST11 1.0000000  
 D1 2.00000000 sec  
 D20 0.00689655 sec  
 TDO 1

----- CHANNEL f1 -----  
 NUC1 13C  
 P1 8.00 usec  
 P2 16.00 usec  
 PL1 -2.00 dB  
 PL1W 56.13311005 W  
 SFO1 100.6266983 MHz

----- CHANNEL f2 -----  
 CPDPRG[2] waltz16  
 NUC2 1H  
 PCPD2 80.00 usec  
 PL2 -2.00 dB  
 PL12 14.00 dB  
 PL2W 12.14226913 W  
 PL12W 0.30500001 W  
 SFO2 400.1515831 MHz

F2 - Processing parameters  
 SI 32768  
 SF 100.6177980 MHz  
 WDW EM  
 SSB 0  
 LB 1.00 Hz  
 GB 0  
 PC 1.40

# Area Percent Report

Data Path : C:\msdchem\1\DATA\  
 Data File : sjb\_77\_041fp.D  
 Acq On : 24 Jan 2013 16:52  
 Operator : sjb  
 Sample : sjb\_77\_041fp  
 Misc :  
 ALS Vial : 10 Sample Multiplier: 1

Integration Parameters: autoint1.e  
 Integrator: ChemStation

Method : C:\msdchem\1\5973N\PRECISION.M  
 Title :

Signal : TIC: sjb\_77\_041fp.D\data.ms

| peak<br># | R.T.<br>min | first<br>scan | max<br>scan | last<br>scan | PK<br>TY | peak<br>height | corr.<br>area | corr.<br>% max. | % of<br>total |
|-----------|-------------|---------------|-------------|--------------|----------|----------------|---------------|-----------------|---------------|
| 1         | 11.479      | 1205          | 1205        | 1205         | M        | -467102        | 0             | 0.00%           | 0.000%        |
| 2         | 11.616      | 1227          | 1229        | 1232         | VV 3     | 33842          | 476512        | 0.14%           | 0.141%        |
| 3         | 11.739      | 1249          | 1251        | 1254         | VV 4     | 30352          | 427668        | 0.13%           | 0.127%        |
| 4         | 11.815      | 1264          | 1264        | 1264         | M4       | -204808        | 0             | 0.00%           | 0.000%        |
| 5         | 12.336      | 1336          | 1355        | 1392         | VV       | 11066989       | 336059983     | 100.00%         | 99.591%       |
| 6         | 16.208      | 2026          | 2032        | 2041         | PV 10    | 18378          | 475433        | 0.14%           | 0.141%        |

Sum of corrected areas: 337439597

Abundance

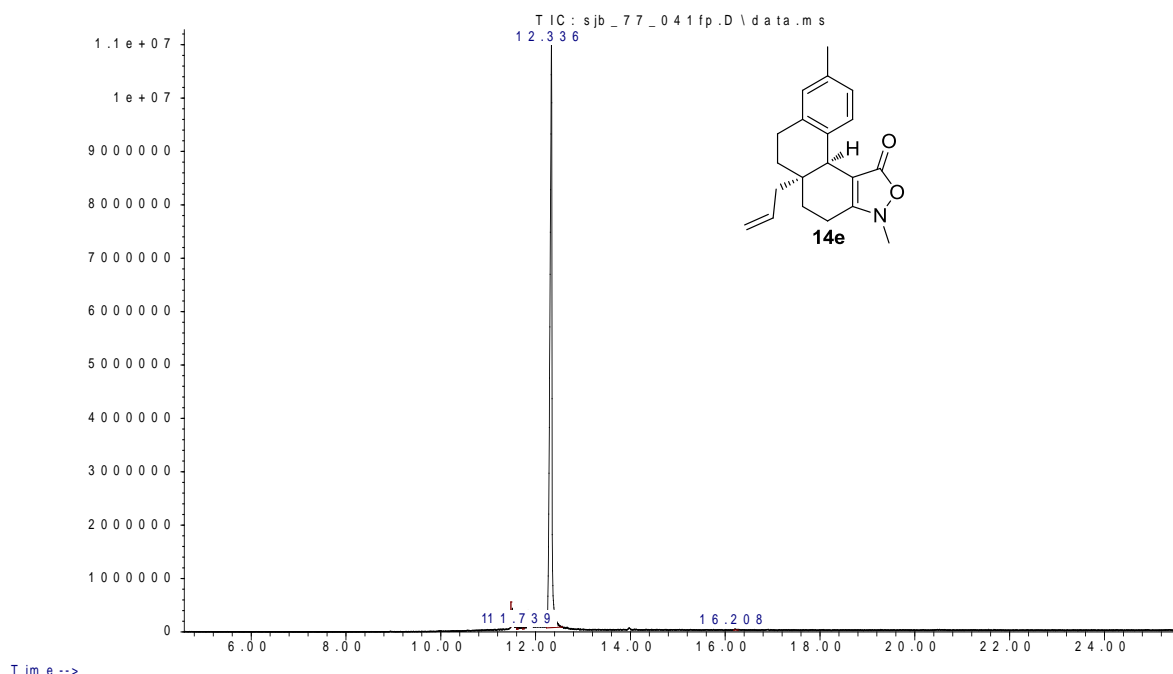

Abundance

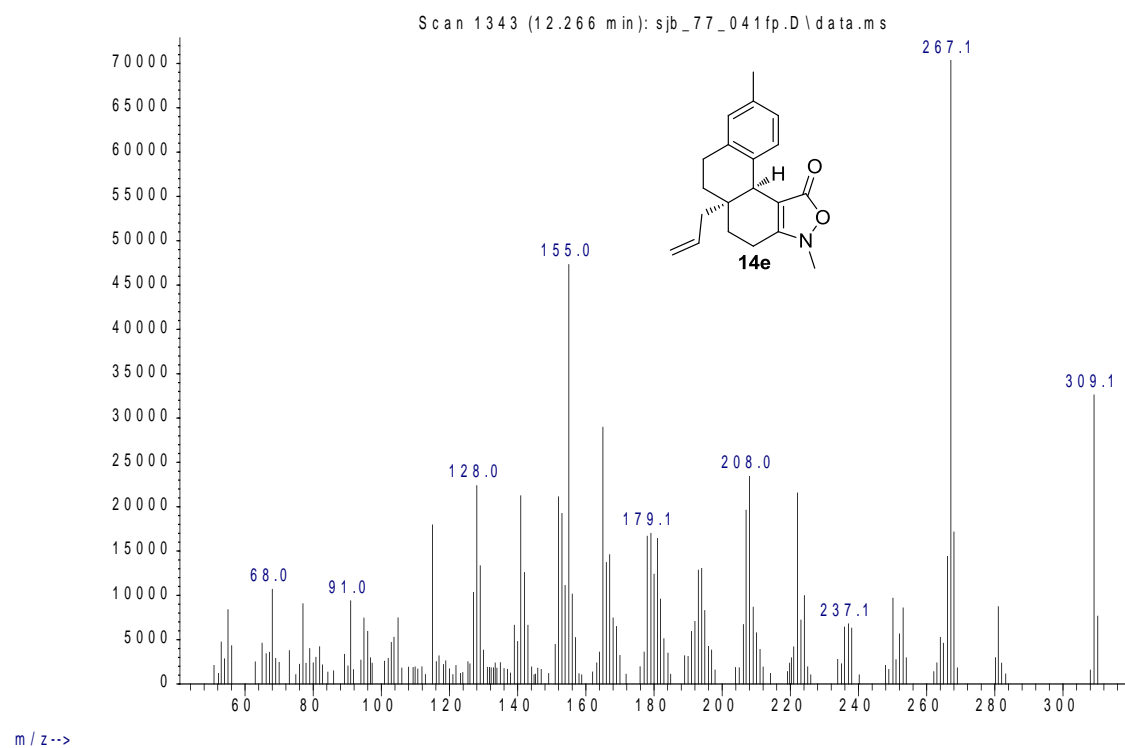

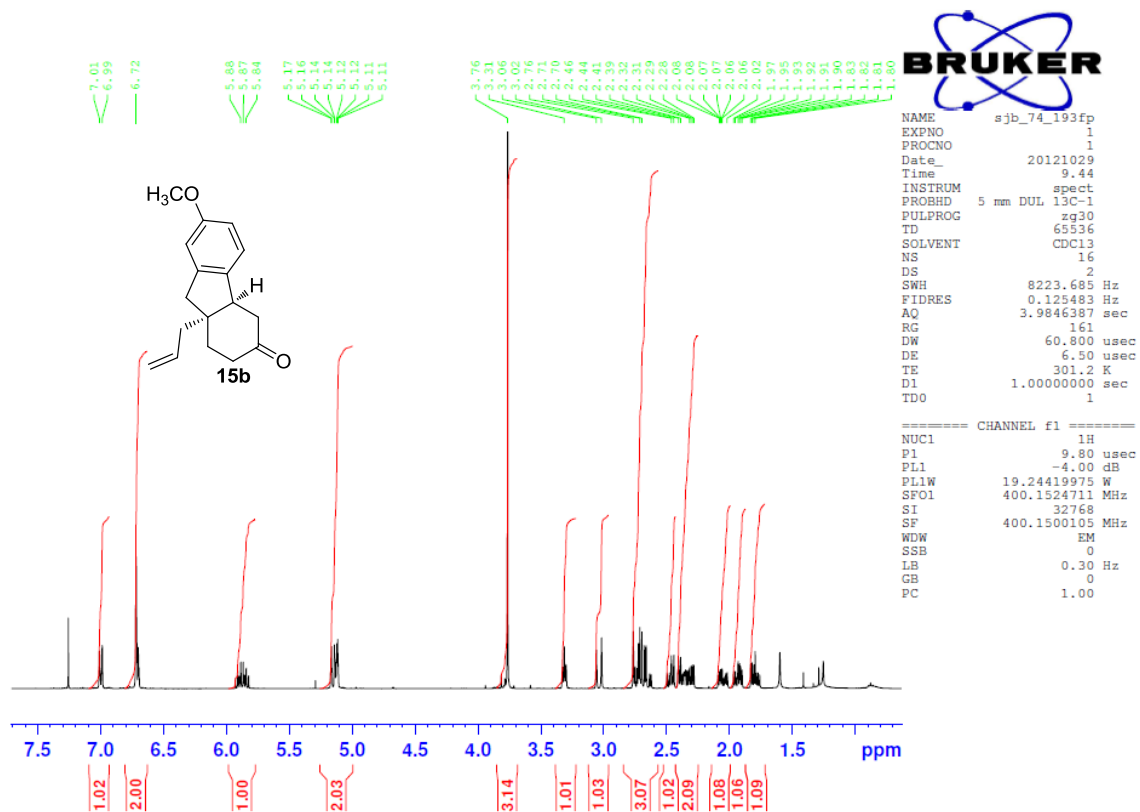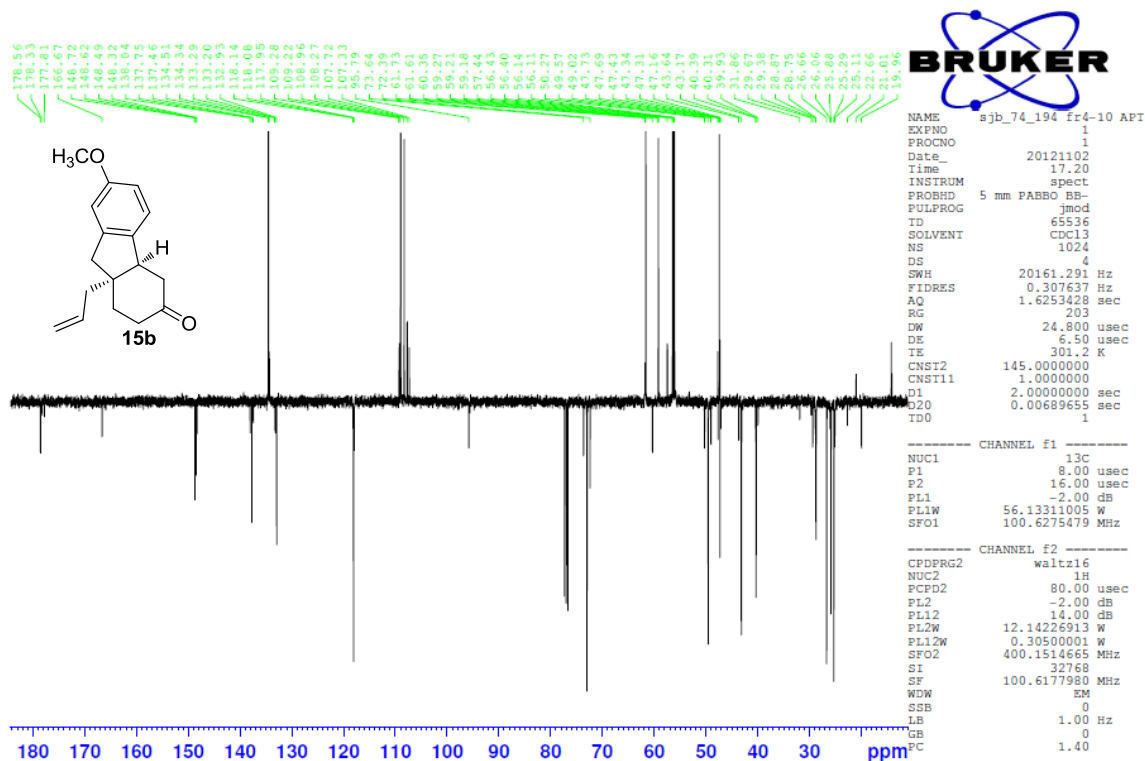

# Area Percent Report

Data Path : C:\msdchem\1\DATA\  
Data File : sjb\_74\_193fp.D  
Acq On : 26 Oct 2012 9:51  
Operator : sjb  
Sample : sjb\_74\_193fp  
Misc :  
ALS Vial : 25 Sample Multiplier: 1

Integration Parameters: autoint1.e  
Integrator: ChemStation

Method : C:\msdchem\1\METHODS\JMB2.m  
Title :

Signal : TIC: sjb\_74\_193fp.D\data.ms

| peak<br># | R.T.<br>min | first<br>scan | max<br>scan | last<br>scan | PK<br>TY | peak<br>height | corr.<br>area | corr.<br>% max. | % of<br>total |
|-----------|-------------|---------------|-------------|--------------|----------|----------------|---------------|-----------------|---------------|
| 1         | 8.048       | 601           | 606         | 619          | BB 2     | 136209         | 1898997       | 0.21%           | 0.206%        |
| 2         | 8.547       | 670           | 693         | 720          | BV       | 40169943       | 918832725     | 100.00%         | 99.531%       |
| 3         | 8.720       | 720           | 723         | 739          | VV 7     | 61335          | 1679808       | 0.18%           | 0.182%        |
| 4         | 9.560       | 862           | 870         | 875          | BV 3     | 63401          | 749249        | 0.08%           | 0.081%        |

Sum of corrected areas: 923160778

JMB2.m Thu Nov 08 10:08:59 2012

Abundance

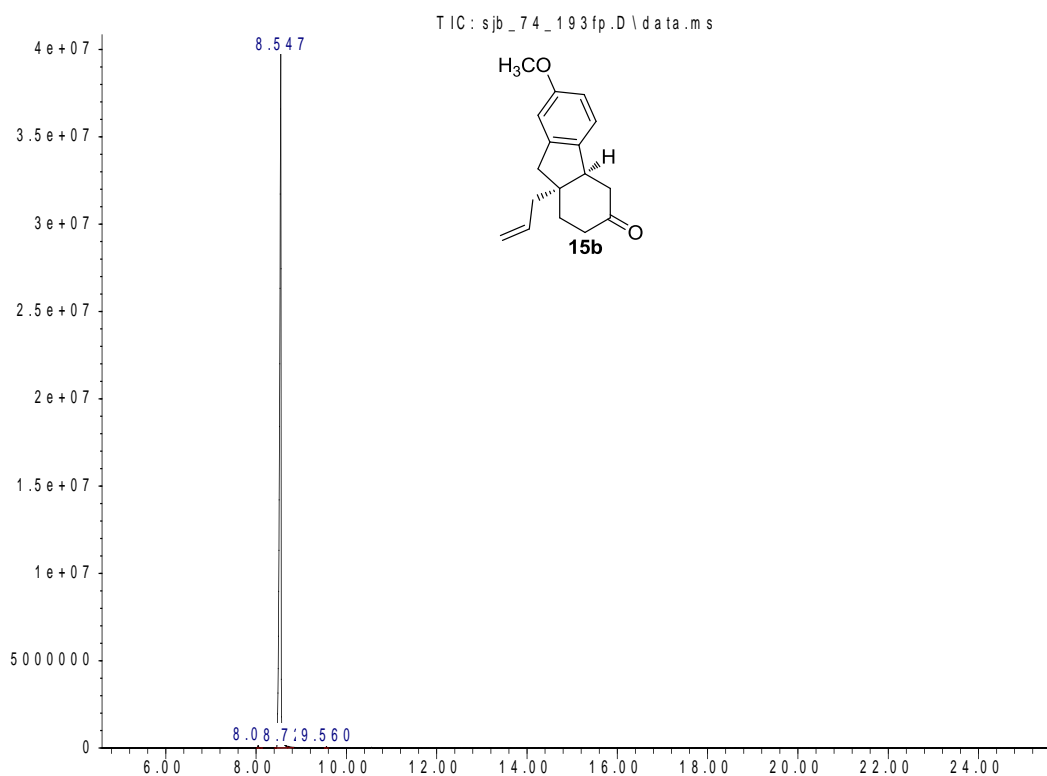

Time-->

Abundance

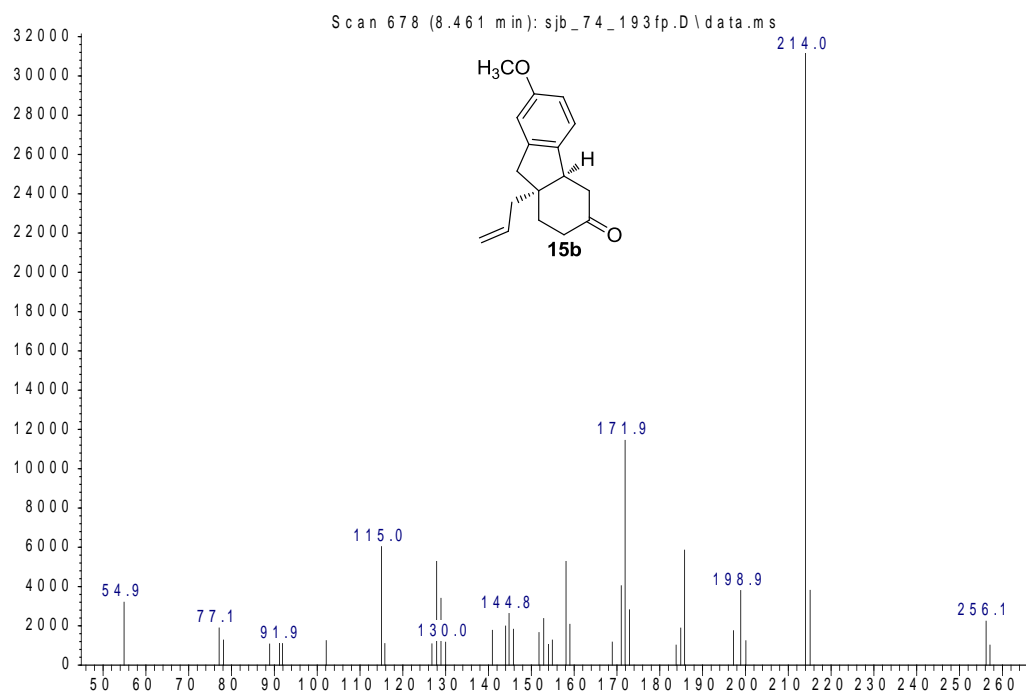

m/z-->

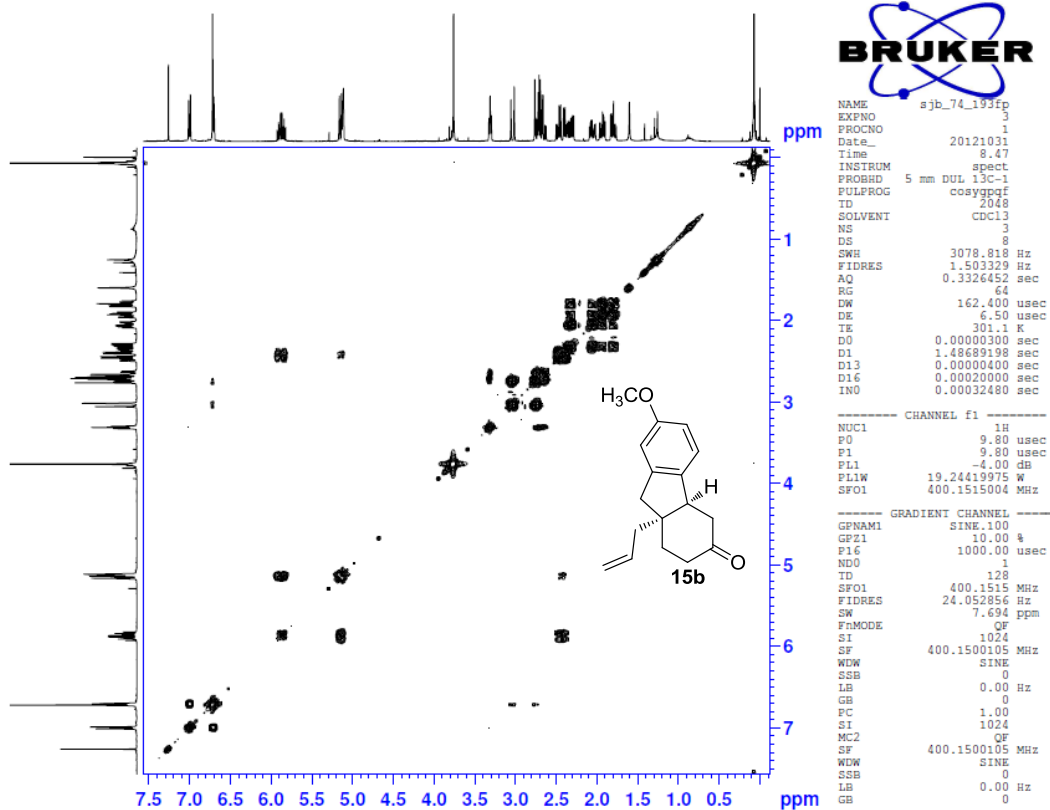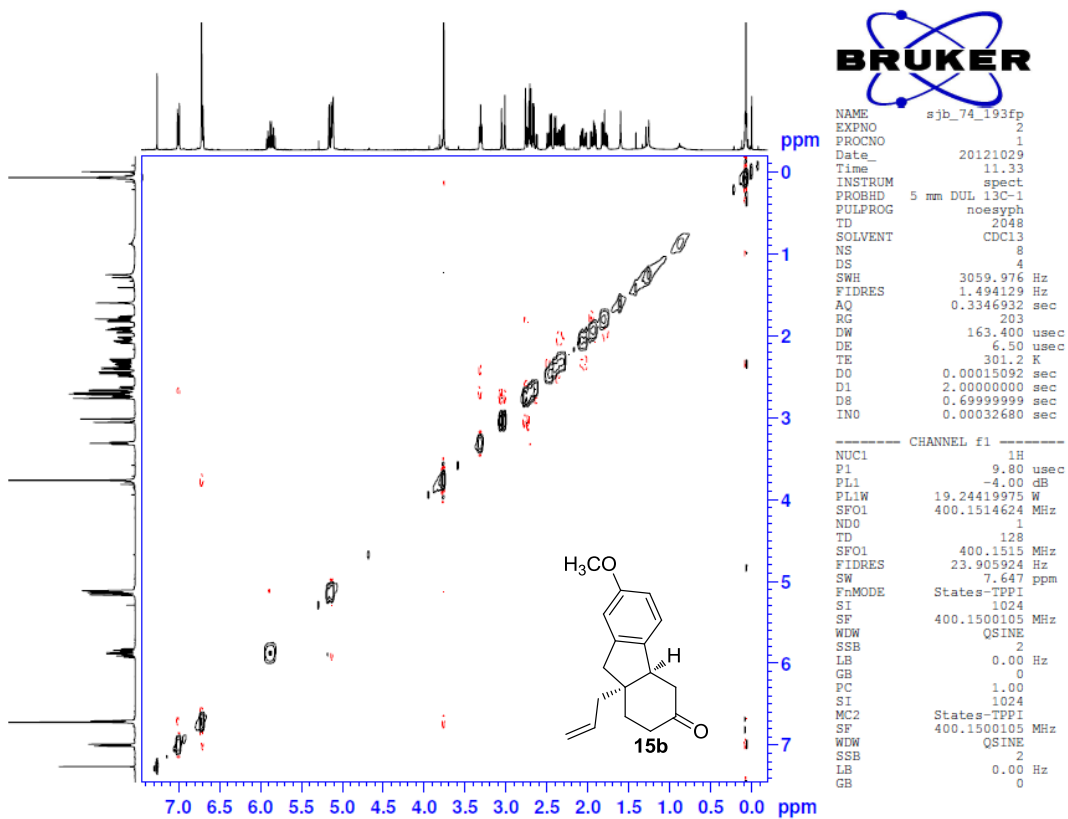

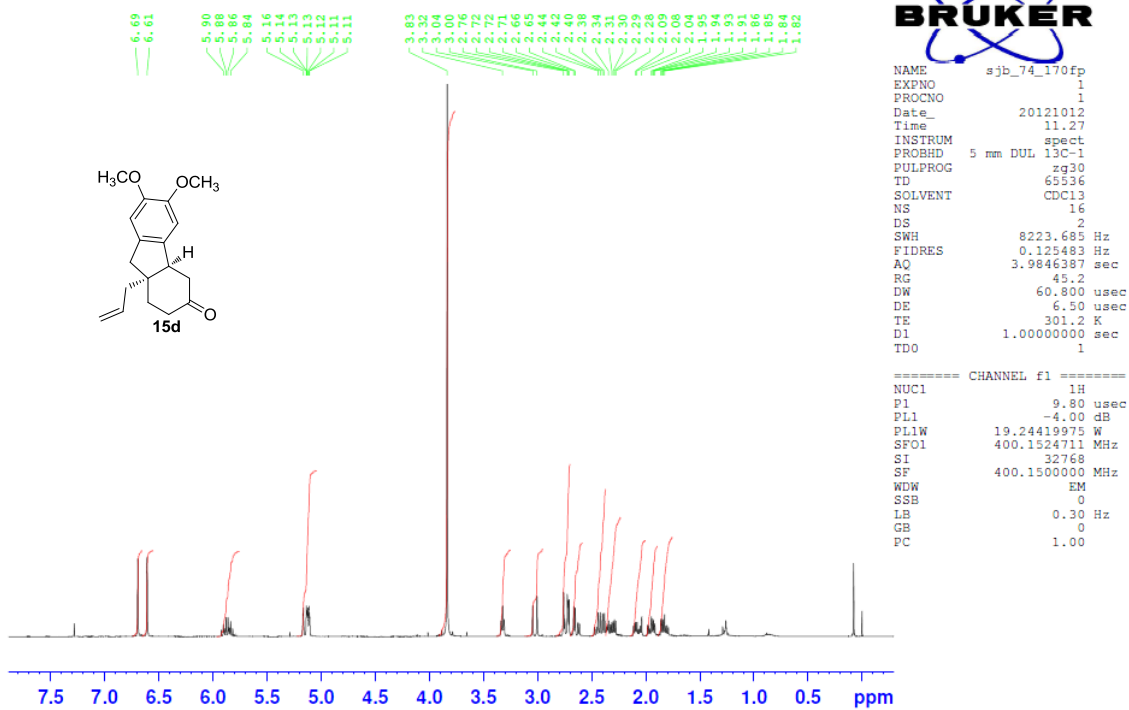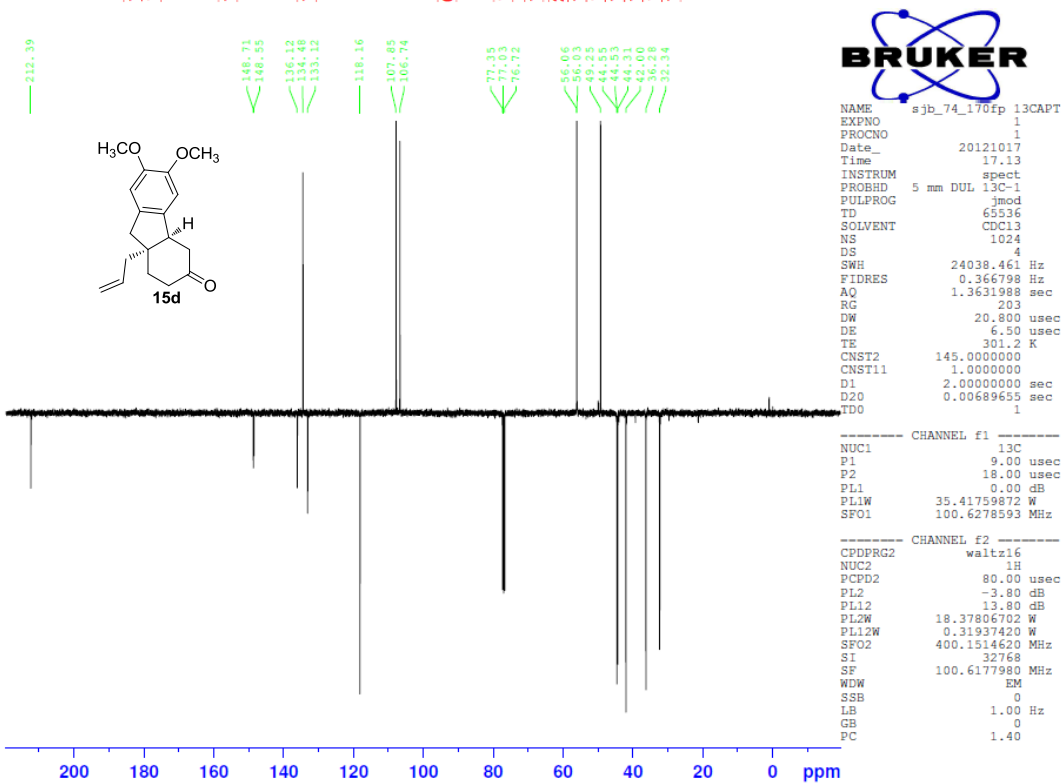

# Area Percent Report

Data Path : C:\msdchem\1\DATA\  
 Data File : sjb\_74\_170fp.D  
 Acq On : 12 Oct 2012 11:58  
 Operator : th  
 Sample : sjb\_74\_170fp  
 Misc :  
 ALS Vial : 10 Sample Multiplier: 1

Integration Parameters: autoint1.e  
 Integrator: ChemStation

Method : C:\msdchem\1\METHODS\JMB2.m  
 Title :

Signal : TIC: sjb\_74\_170fp.D\data.ms

| peak<br># | R.T.<br>min | first<br>scan | max<br>scan | last<br>scan | PK<br>TY | peak<br>height | corr.<br>area | corr.<br>% max. | % of<br>total |
|-----------|-------------|---------------|-------------|--------------|----------|----------------|---------------|-----------------|---------------|
| 1         | 9.520       | 845           | 863         | 903          | BV       | 30303782       | 659142387     | 100.00%         | 97.384%       |
| 2         | 9.769       | 903           | 907         | 921          | VV 6     | 35305          | 957519        | 0.15%           | 0.141%        |
| 3         | 12.858      | 1437          | 1447        | 1475         | VV 3     | 525720         | 16747955      | 2.54%           | 2.474%        |

Sum of corrected areas: 676847861

JMB2.m Wed Oct 17 14:59:13 2012

Abundance

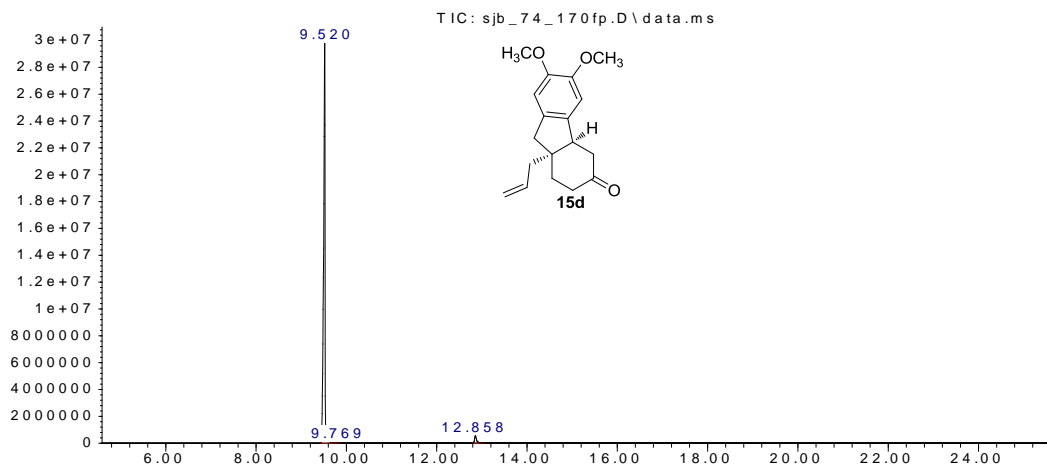

Abundance

Scan 858 (9.491 min): sjb\_74\_170fp.D\data.ms

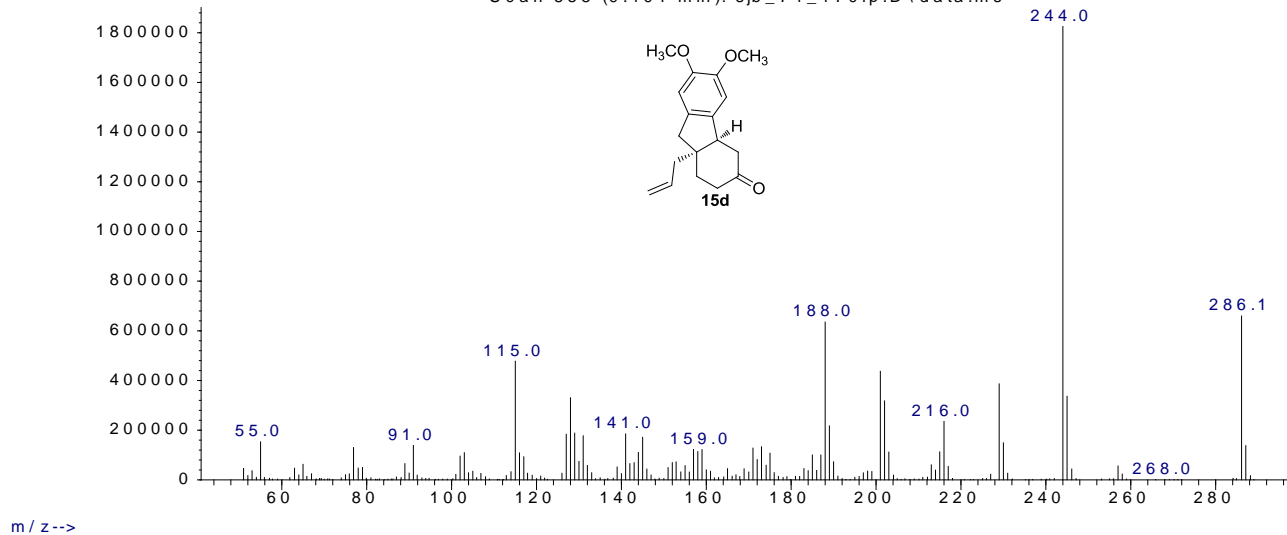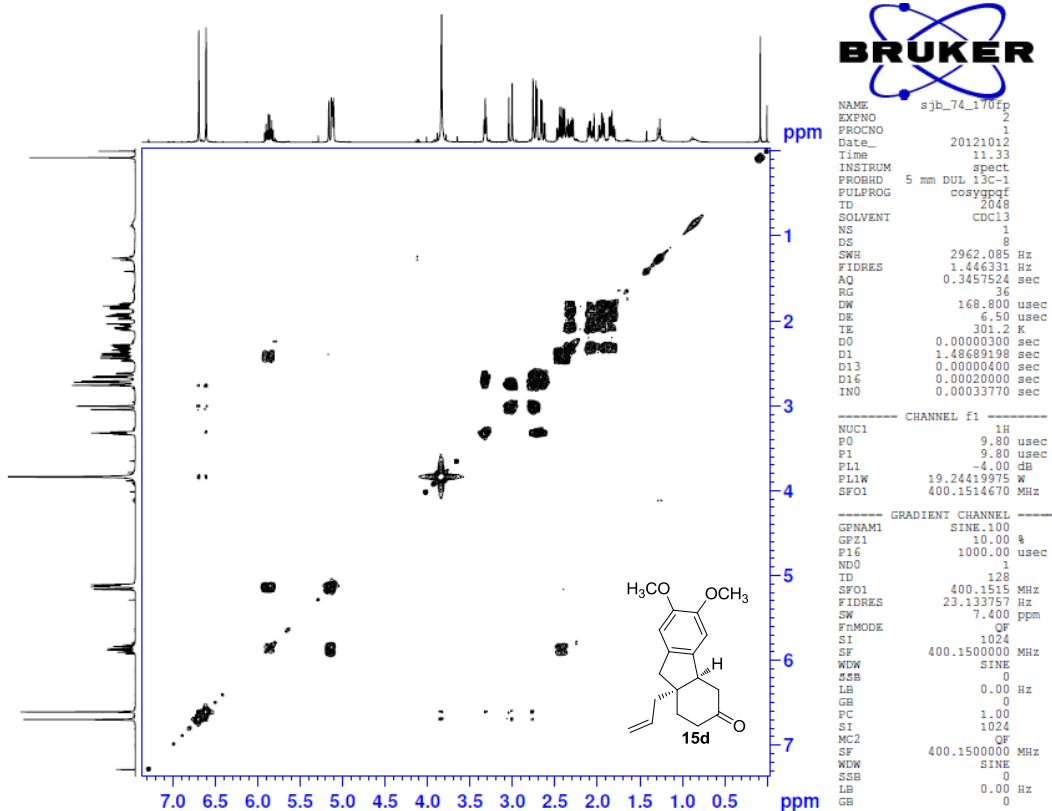

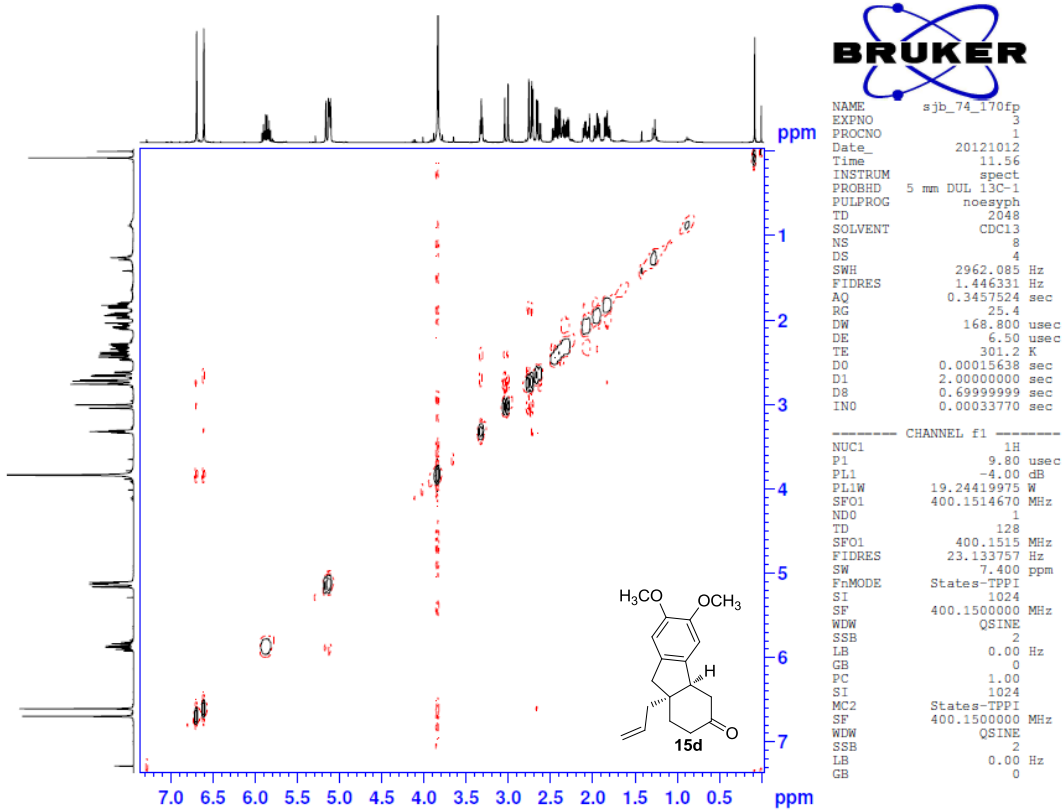

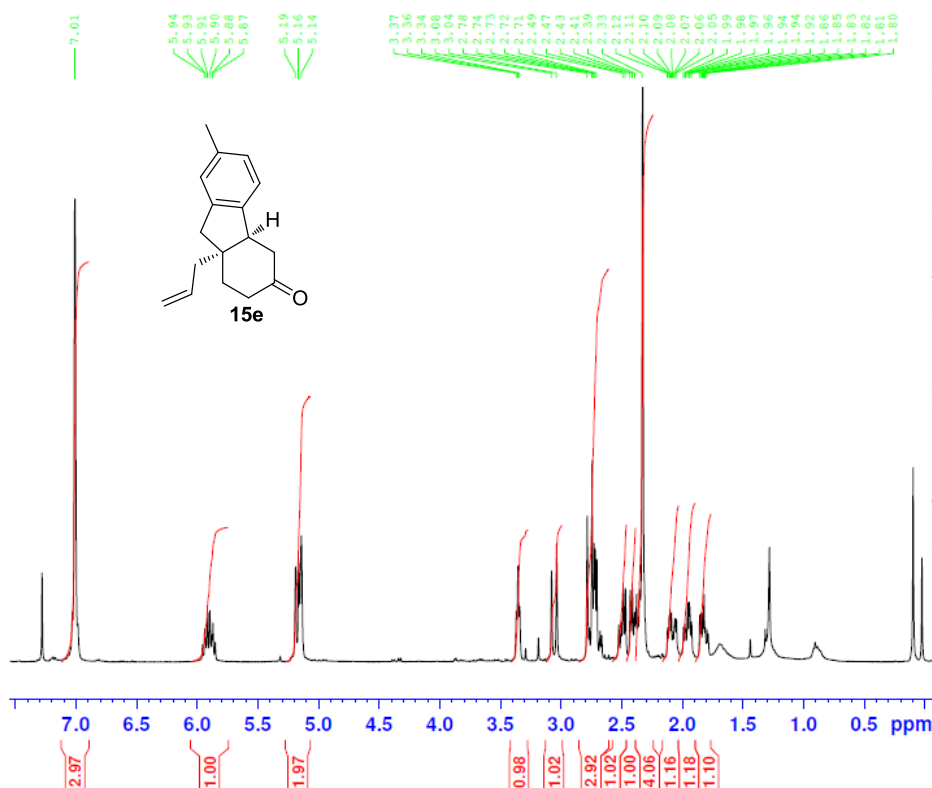

**BRUKER**

```

NAME      sjb_77_155fp take 2
EXPNO     1
PROCNO    1
Date_     20130730
Time      9.33
INSTRUM   spect
PROBHD    5 mm PABBO BB-
PULPROG   zg30
TD         65536
SOLVENT   CDCl3
NS         16
DS         2
SWH        8223.685 Hz
FIDRES     0.125483 Hz
AQ         3.9846387 sec
RG         144
DW         60.800 usec
DE         6.50 usec
TE         301.2 K
D1         1.00000000 sec
TD0        1

----- CHANNEL f1 -----
NUC1       1H
P1         12.50 usec
PL1        -2.00 dB
PL1W       12.14226913 W
SFO1       400.1524711 MHz
SI         32768
SF         400.1500000 MHz
WDW        EM
SSB        0
LB         0.30 Hz
GB         0
PC         1.00
  
```

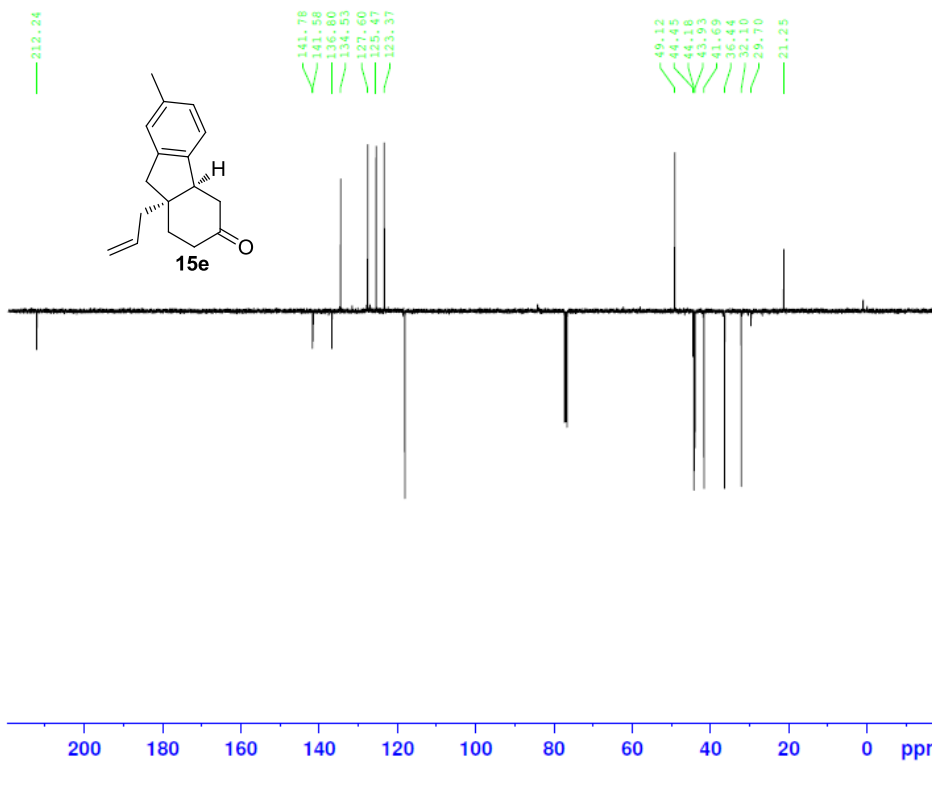

**BRUKER**

```

NAME      sjb_77_155fp APT
EXPNO     1
PROCNO    1
Date_     20130730
Time      10.38
INSTRUM   spect
PROBHD    5 mm PABBO BB-
PULPROG   jmod
TD         65536
SOLVENT   CDCl3
NS         1024
DS         4
SWH        24038.461 Hz
FIDRES     0.366798 Hz
AQ         1.3631988 sec
RG         203
DW         20.800 usec
DE         6.50 usec
TE         301.2 K
CNST2     145.0000000
CNST11    1.0000000
D1         2.00000000 sec
D20       0.00689655 sec
TD0        1

----- CHANNEL f1 -----
NUC1       13C
P1         8.00 usec
P2         16.00 usec
PL1        -2.00 dB
PL1W       56.13311005 W
SFO1       100.6278593 MHz

----- CHANNEL f2 -----
CPDPRG2   waltz16
NUC2       1H
PCPD2      80.00 usec
PL2        -2.00 dB
PL12       14.00 dB
PL2W       12.14226913 W
PL12W      0.30500001 W
SFO2       400.1514963 MHz
SI         32768
SF         100.6177980 MHz
WDW        EM
SSB        0
LB         1.00 Hz
GB         0
PC         1.40
  
```

# Area Percent Report

Data Path : C:\msdchem\1\DATA\  
 Data File : sjb\_77\_155fp.D  
 Acq On : 17 Jul 2013 19:26  
 Operator : JMB  
 Sample : sjb\_77\_155fp  
 Misc :  
 ALS Vial : 70 Sample Multiplier: 1

Integration Parameters: autoint1.e  
 Integrator: ChemStation

Method : C:\msdchem\1\5973N\PRECISION.M  
 Title :

Signal : TIC: sjb\_77\_155fp.D\data.ms

| peak<br># | R.T.<br>min | first<br>scan | max<br>scan | last<br>scan | PK<br>TY | peak<br>height | corr.<br>area | corr.<br>% max. | % of<br>total |
|-----------|-------------|---------------|-------------|--------------|----------|----------------|---------------|-----------------|---------------|
| 1         | 7.438       | 485           | 499         | 557          | PV       | 17547844       | 273377835     | 100.00%         | 99.173%       |
| 2         | 12.685      | 1406          | 1416        | 1423         | BV 3     | 71876          | 1506033       | 0.55%           | 0.546%        |
| 3         | 12.746      | 1423          | 1427        | 1438         | VV 6     | 38668          | 772660        | 0.28%           | 0.280%        |

Sum of corrected areas: 275656527

Abundance

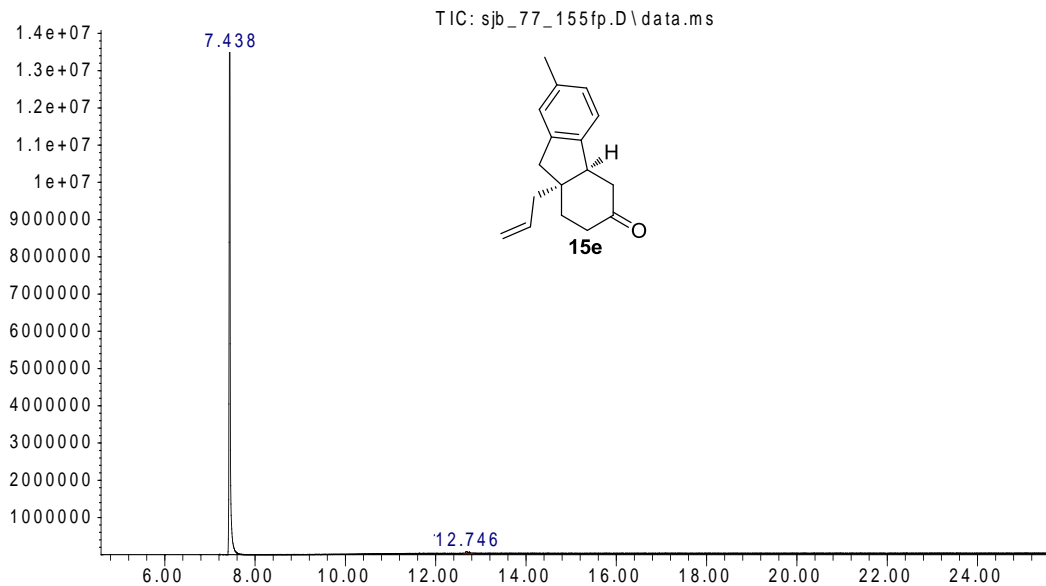

Time-->

Abundance

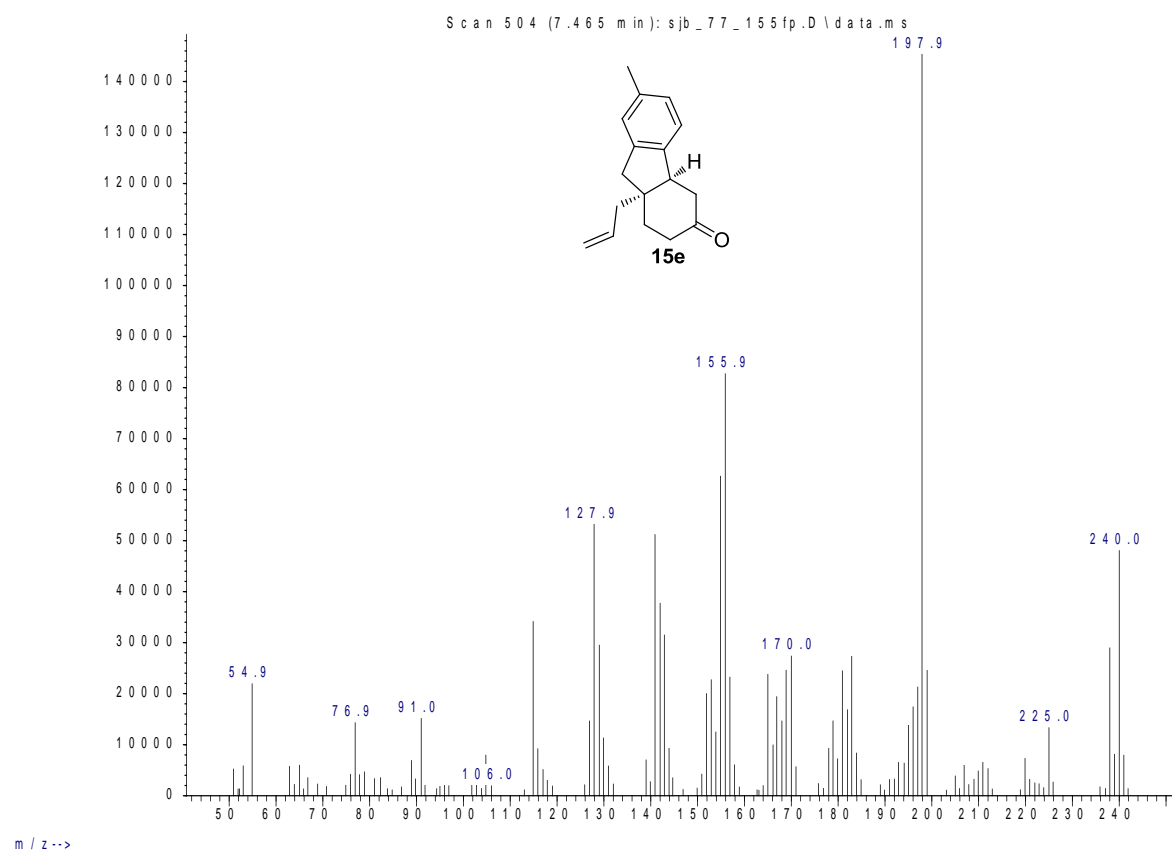

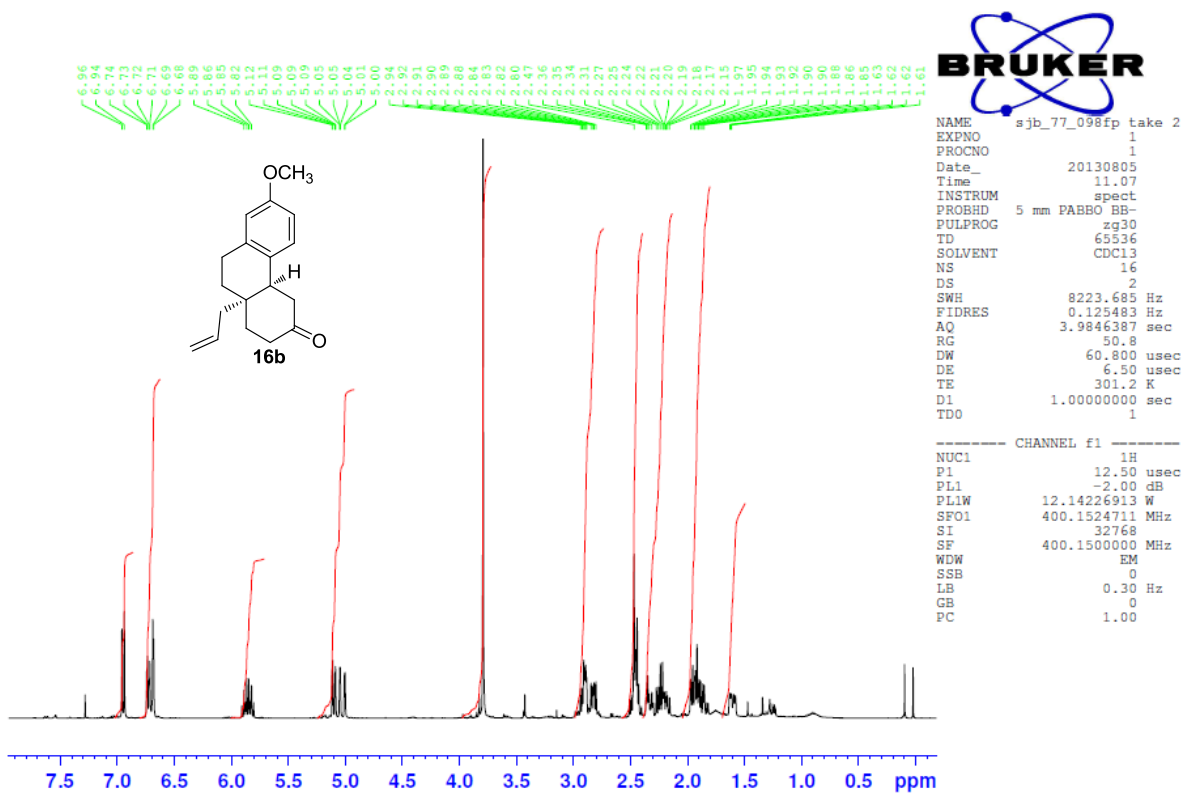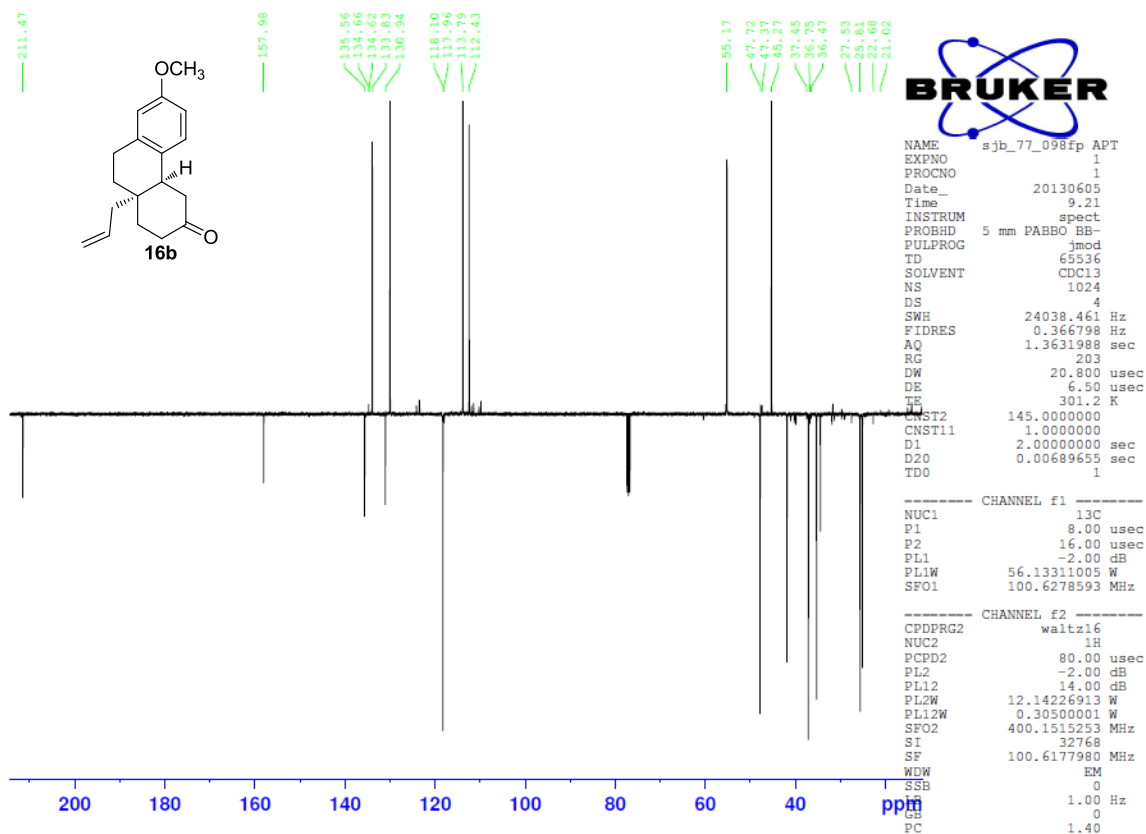

# Area Percent Report

Data Path : C:\msdchem\1\DATA\  
 Data File : sjb\_74\_055fp.D  
 Acq On : 5 Jul 2012 11:31  
 Operator : sjb  
 Sample : sjb\_74\_055fp  
 Misc :  
 ALS Vial : 100 Sample Multiplier: 1

Integration Parameters: autoint1.e  
 Integrator: ChemStation

Method : C:\msdchem\1\METHODS\JMB2.m  
 Title :

Signal : TIC: sjb\_74\_055fp.D\data.ms

| peak<br># | R.T.<br>min | first<br>scan | max<br>scan | last<br>scan | PK<br>TY | peak<br>height | corr.<br>area | corr.<br>% max. | % of<br>total |
|-----------|-------------|---------------|-------------|--------------|----------|----------------|---------------|-----------------|---------------|
| 1         | 8.844       | 737           | 745         | 759          | BB       | 519105         | 7434595       | 3.19%           | 3.034%        |
| 2         | 9.079       | 779           | 786         | 796          | BV       | 347741         | 4764015       | 2.05%           | 1.944%        |
| 3         | 9.434       | 833           | 848         | 892          | BV       | 11665755       | 232806835     | 100.00%         | 95.021%       |

Sum of corrected areas: 245005445

JMB2.m Mon Nov 12 10:09:42 2012

Abundance

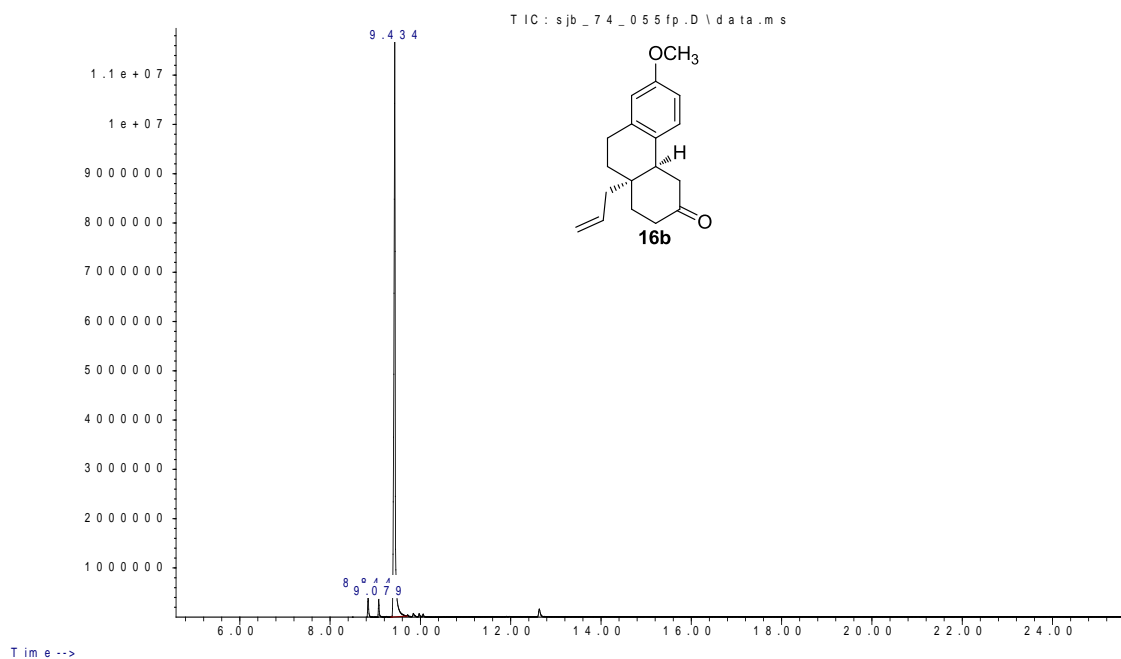

Abundance

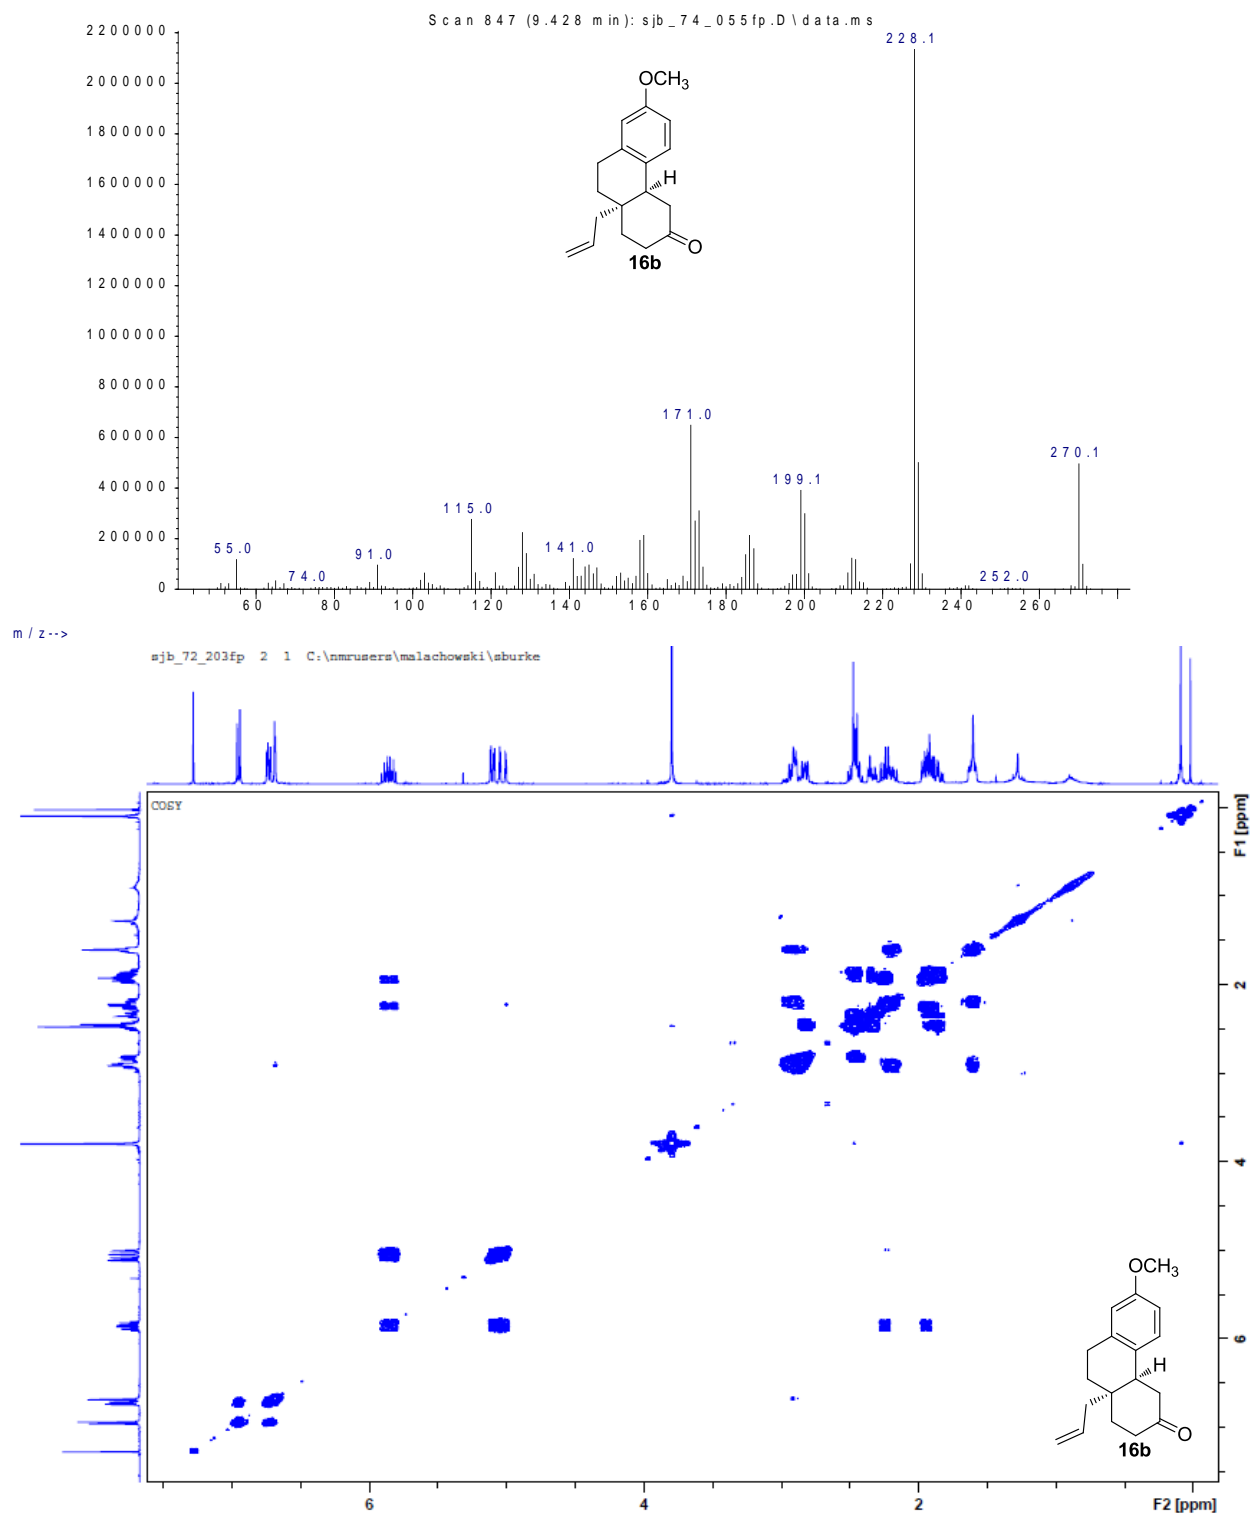

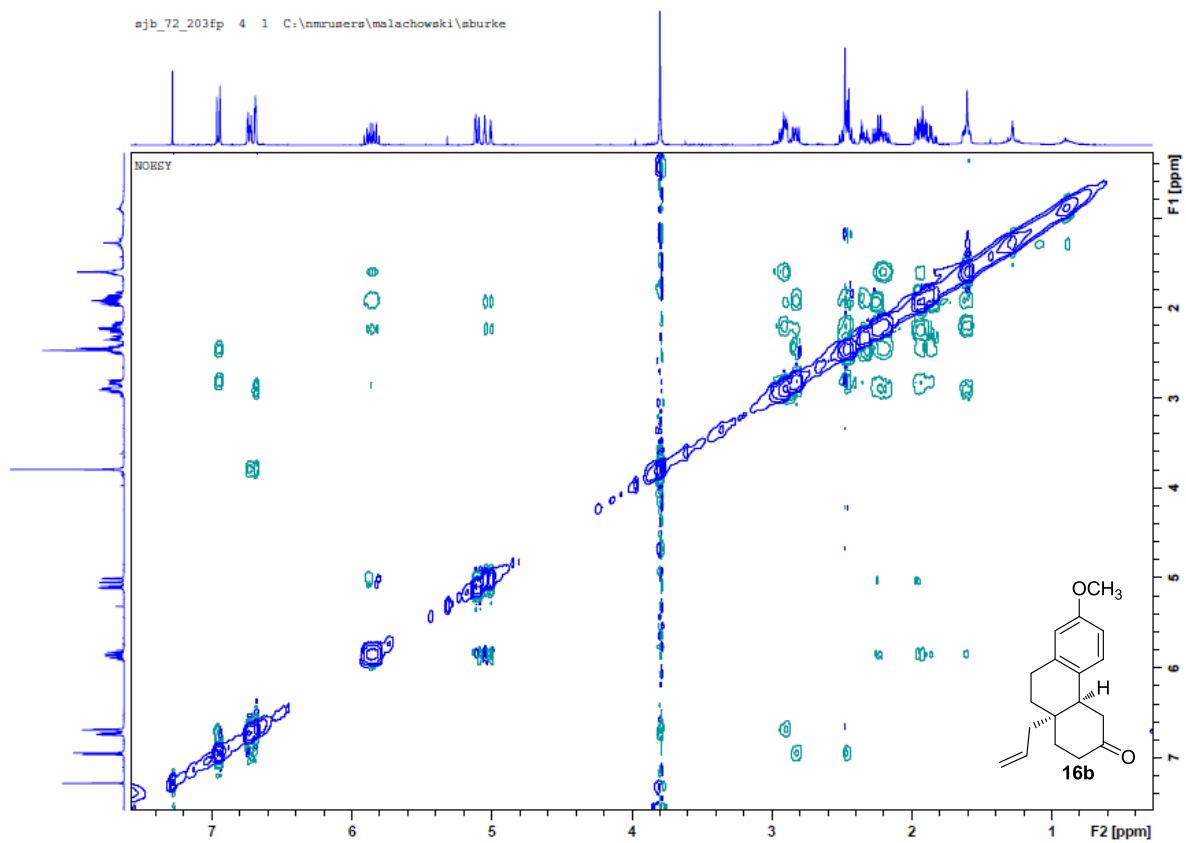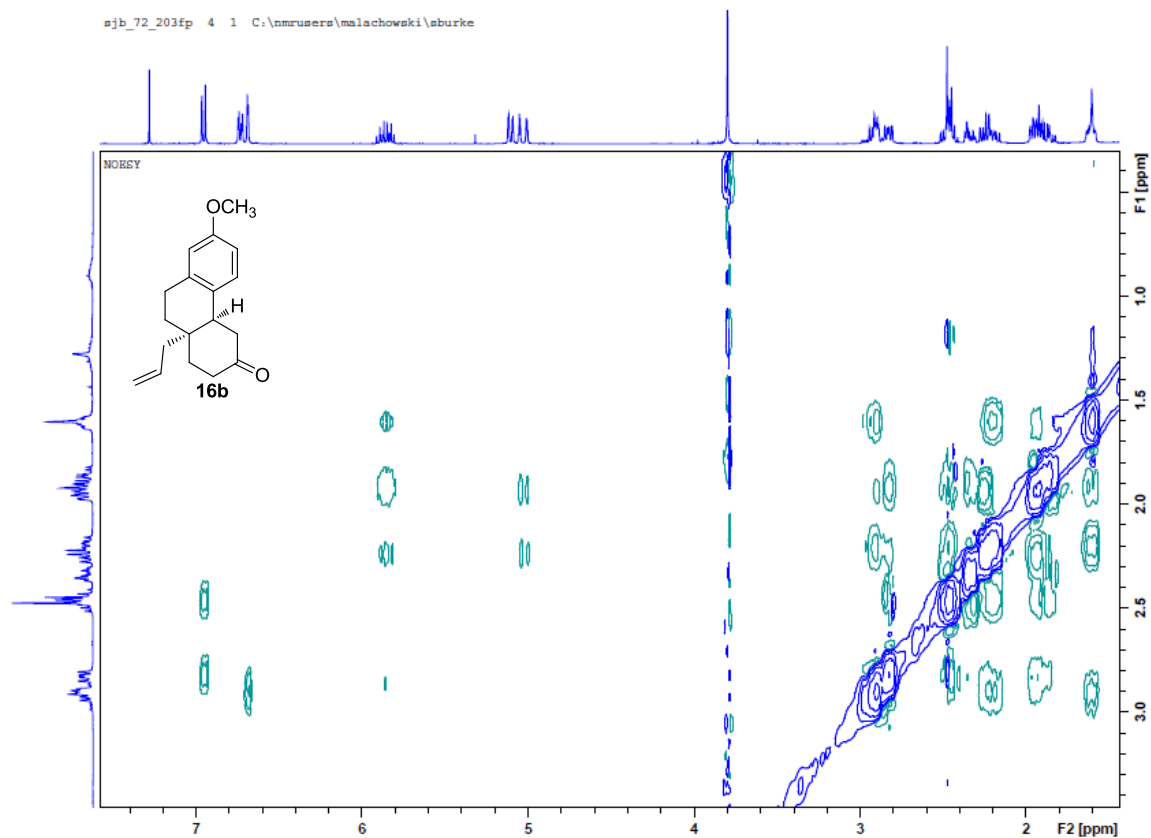

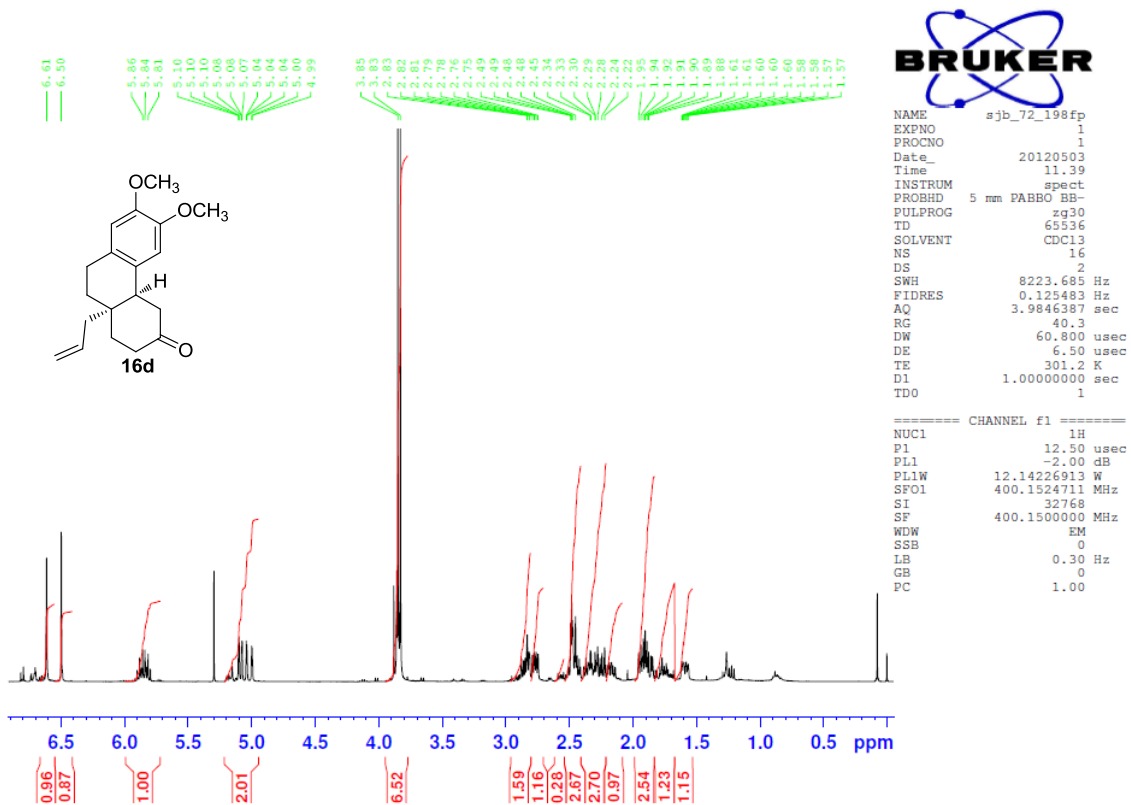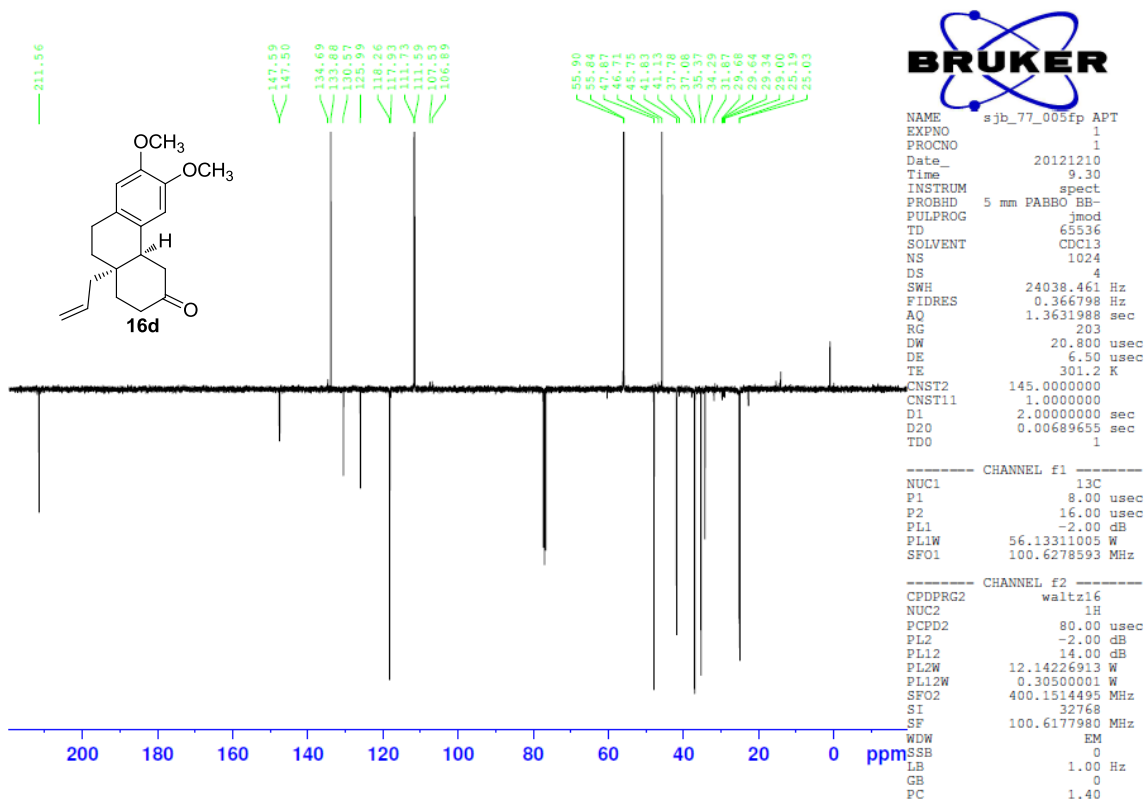

# Area Percent Report

Data Path : C:\msdchem\1\DATA\  
 Data File : sjb\_72\_198fp.D  
 Acq On : 3 May 2012 11:59  
 Operator : sjb  
 Sample : sjb\_72\_198fp  
 Misc :  
 ALS Vial : 55 Sample Multiplier: 1

Integration Parameters: autoint1.e  
 Integrator: ChemStation

Method : C:\msdchem\1\METHODS\JMB2.m  
 Title :

Signal : TIC: sjb\_72\_198fp.D\data.ms

| peak<br># | R.T.<br>min | first<br>scan | max<br>scan | last<br>scan | PK<br>TY | peak<br>height | corr.<br>area | corr.<br>% max. | % of<br>total |
|-----------|-------------|---------------|-------------|--------------|----------|----------------|---------------|-----------------|---------------|
| 1         | 9.415       | 838           | 845         | 854          | PV 3     | 35843          | 523833        | 0.06%           | 0.060%        |
| 2         | 9.771       | 888           | 907         | 926          | PV       | 639609         | 9434624       | 1.12%           | 1.081%        |
| 3         | 9.958       | 926           | 940         | 964          | VV 3     | 682972         | 12270772      | 1.45%           | 1.406%        |
| 4         | 10.386      | 999           | 1015        | 1076         | PV       | 37735401       | 845131612     | 100.00%         | 96.870%       |
| 5         | 10.748      | 1076          | 1078        | 1083         | VV 5     | 44991          | 946871        | 0.11%           | 0.109%        |
| 6         | 10.788      | 1083          | 1085        | 1090         | VV 5     | 27602          | 321745        | 0.04%           | 0.037%        |
| 7         | 14.044      | 1628          | 1654        | 1680         | VV 5     | 82632          | 3807415       | 0.45%           | 0.436%        |

Sum of corrected areas: 872436873

JMB2.m Thu Nov 08 10:05:52 2012

Abundance

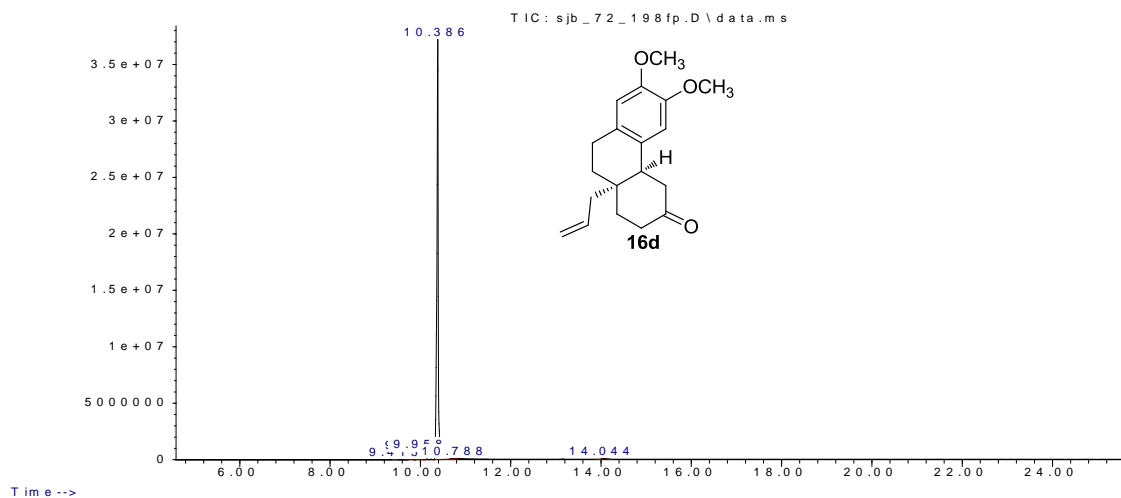

Abundance

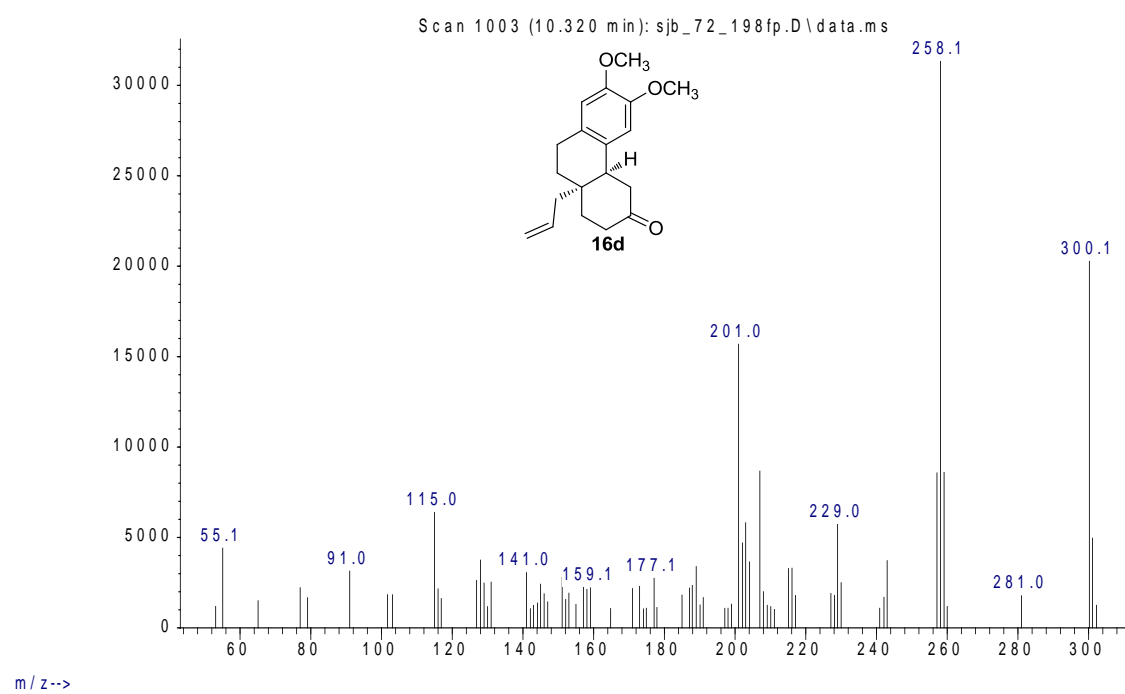

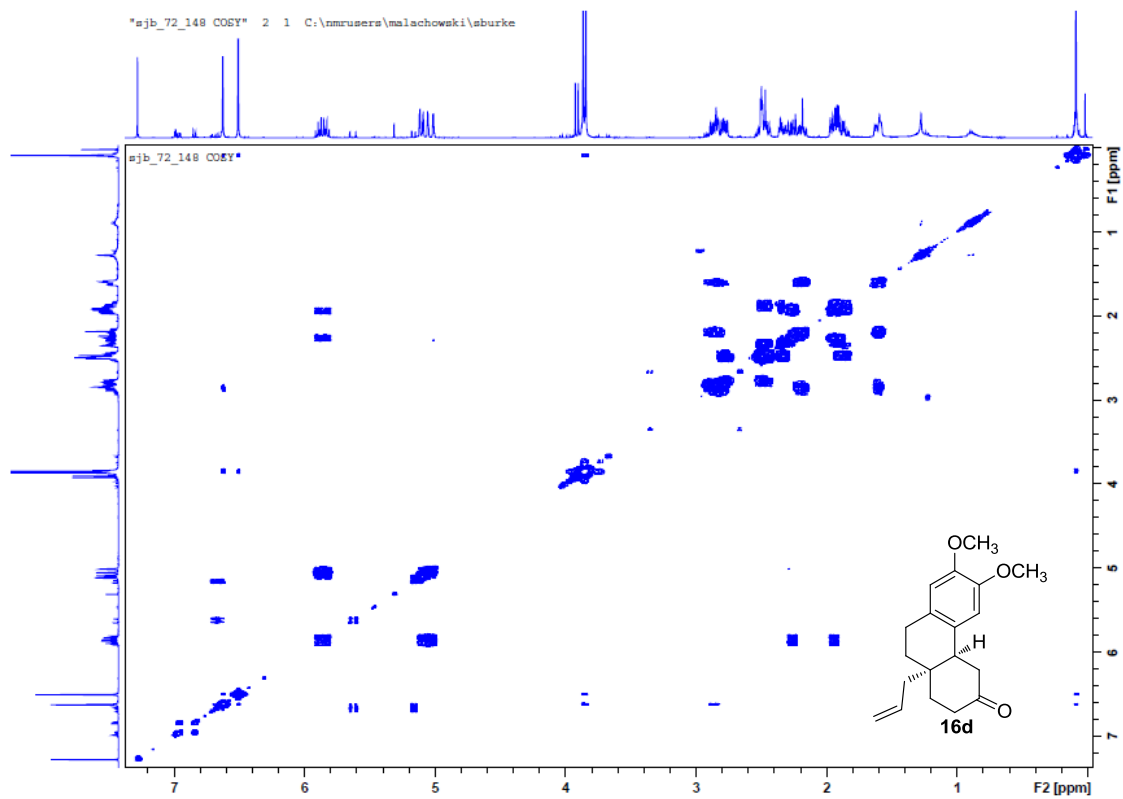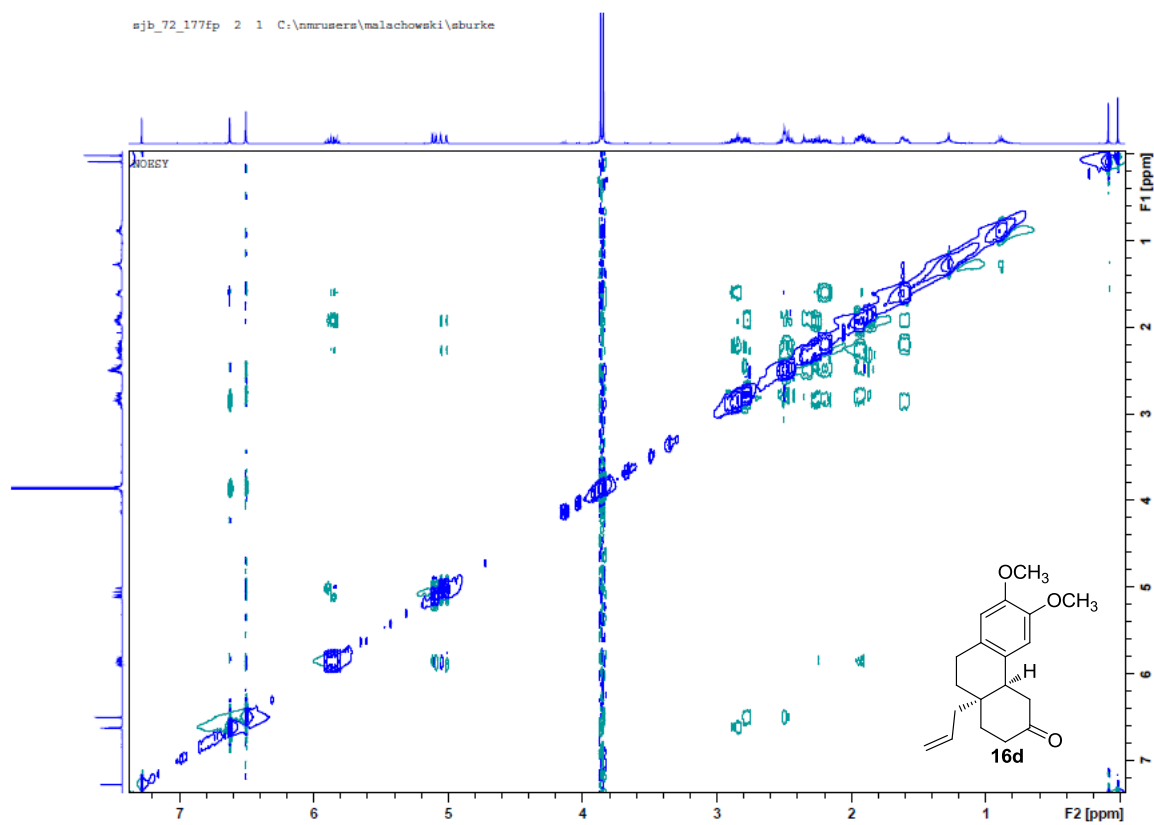

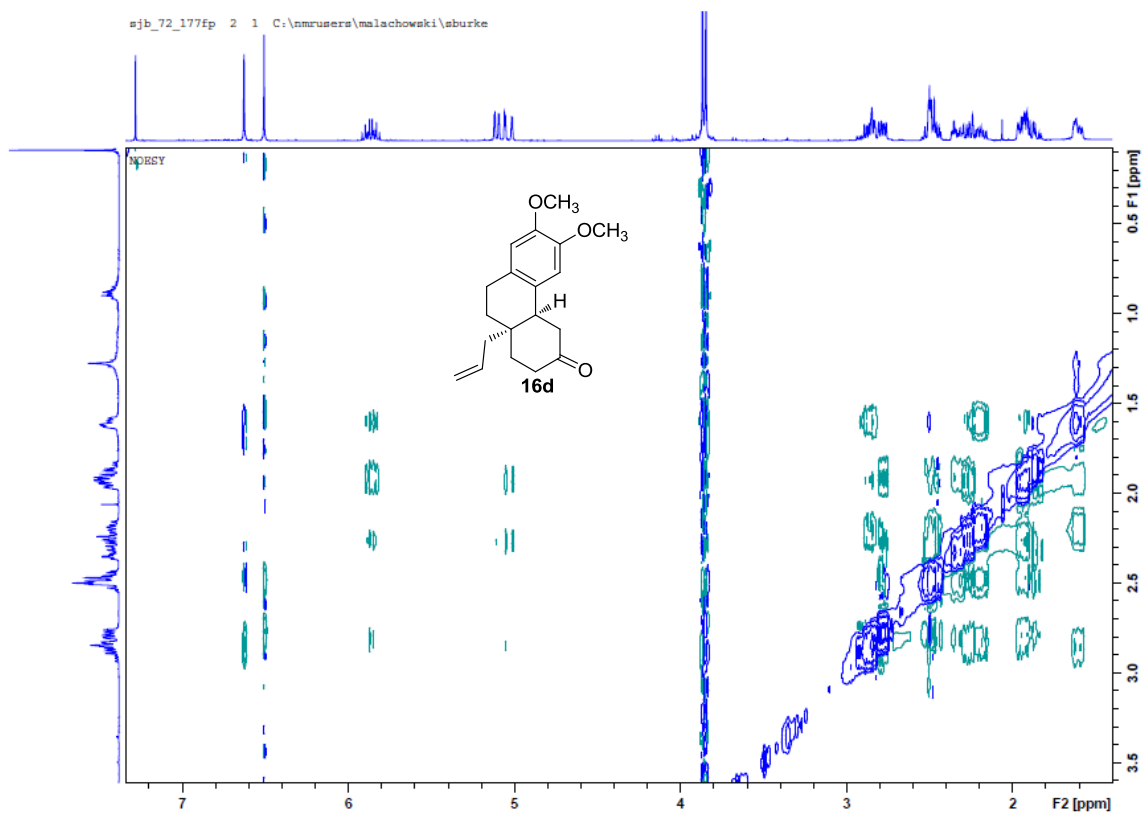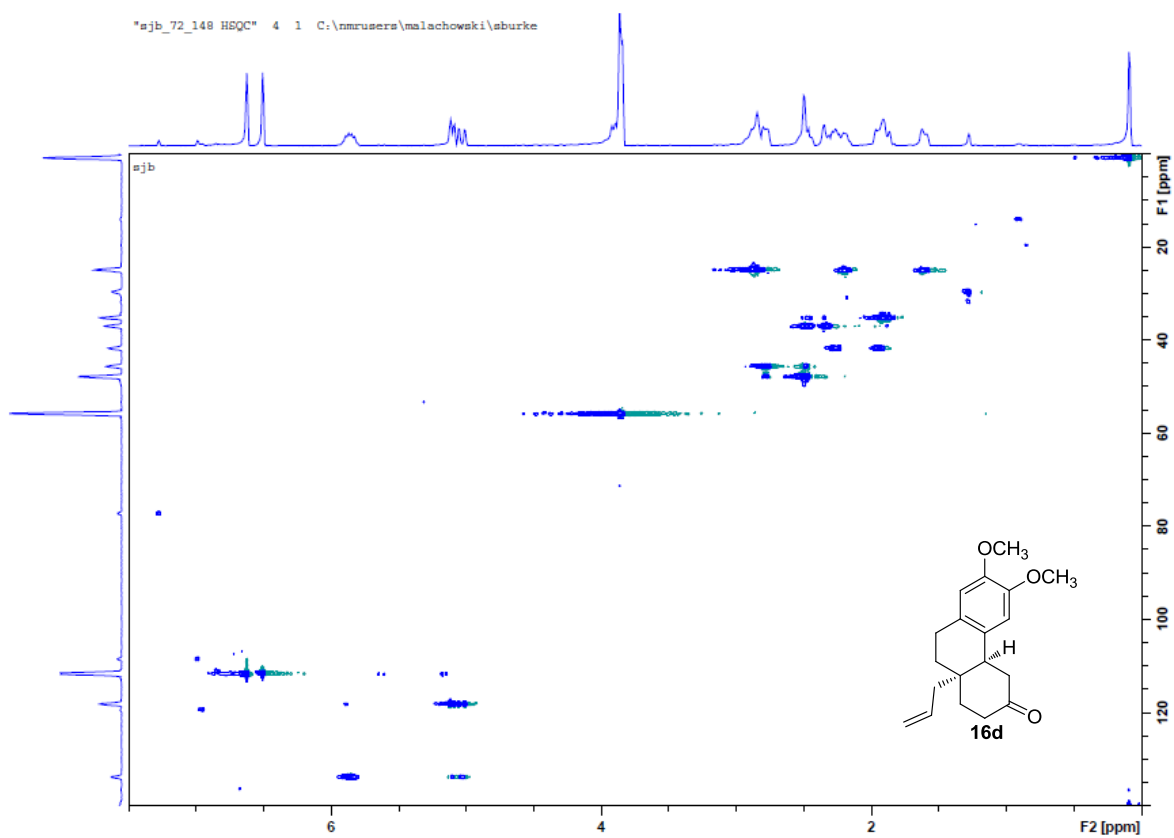

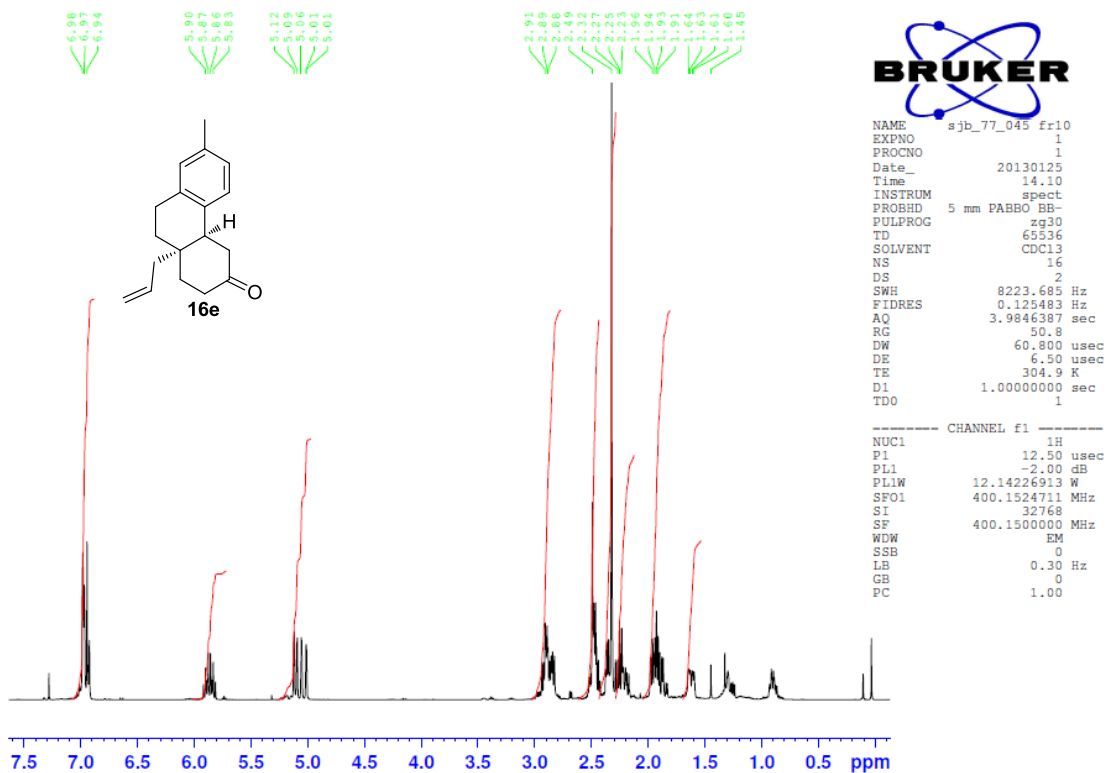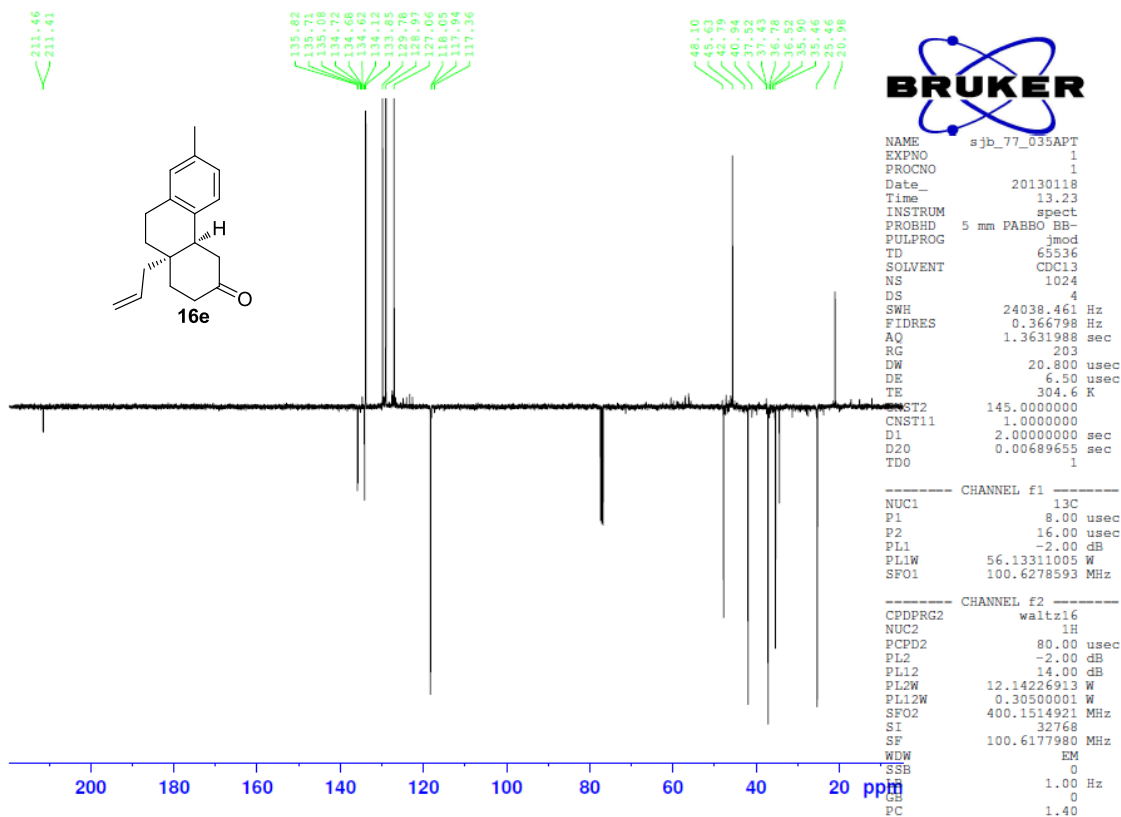

# Area Percent Report

Data Path : C:\msdchem\1\DATA\  
 Data File : sjb\_77\_035fp.D  
 Acq On : 17 Jan 2013 9:18  
 Operator : sjb  
 Sample : sjb\_77\_035fp  
 Misc :  
 ALS Vial : 15 Sample Multiplier: 1

Integration Parameters: autoint1.e  
 Integrator: ChemStation

Method : C:\msdchem\1\5973N\PRECISION.M  
 Title :

Signal : TIC: sjb\_77\_035fp.D\data.ms

| peak<br># | R.T.<br>min | first<br>scan | max<br>scan | last<br>scan | PK<br>TY | peak<br>height | corr.<br>area | corr.<br>% max. | % of<br>total |
|-----------|-------------|---------------|-------------|--------------|----------|----------------|---------------|-----------------|---------------|
| 1         | 7.859       | 567           | 573         | 586          | BV       | 921047         | 12330088      | 2.82%           | 2.645%        |
| 2         | 8.115       | 602           | 618         | 630          | BV 2     | 742118         | 9405778       | 2.15%           | 2.017%        |
| 3         | 8.452       | 662           | 677         | 691          | VV       | 22818856       | 436485499     | 100.00%         | 93.619%       |
| 4         | 11.442      | 1191          | 1199        | 1218         | PV 3     | 413116         | 8016772       | 1.84%           | 1.719%        |

Sum of corrected areas: 466238136

Abundance

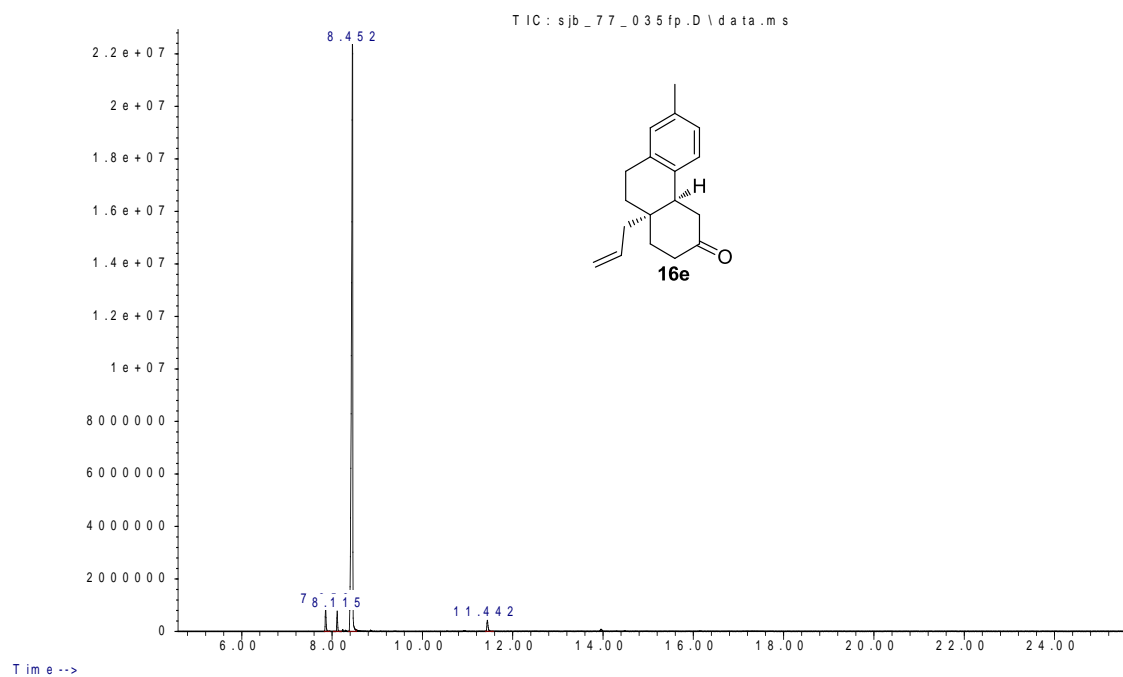

Abundance

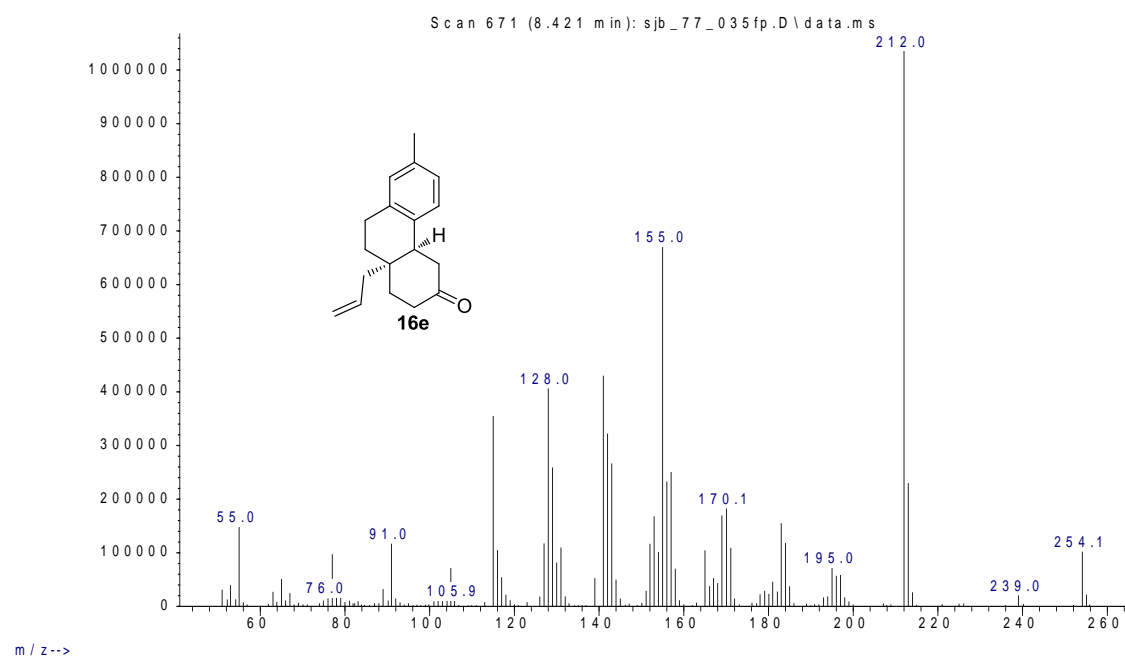

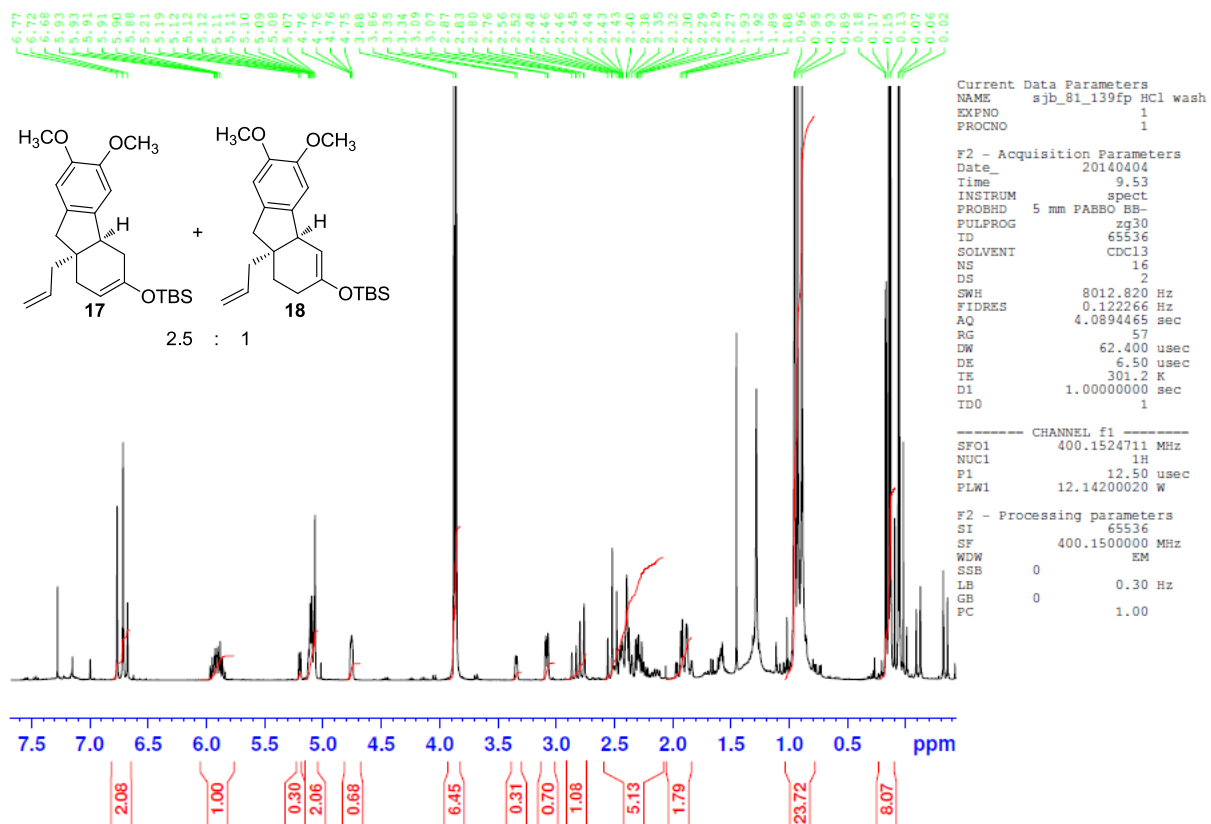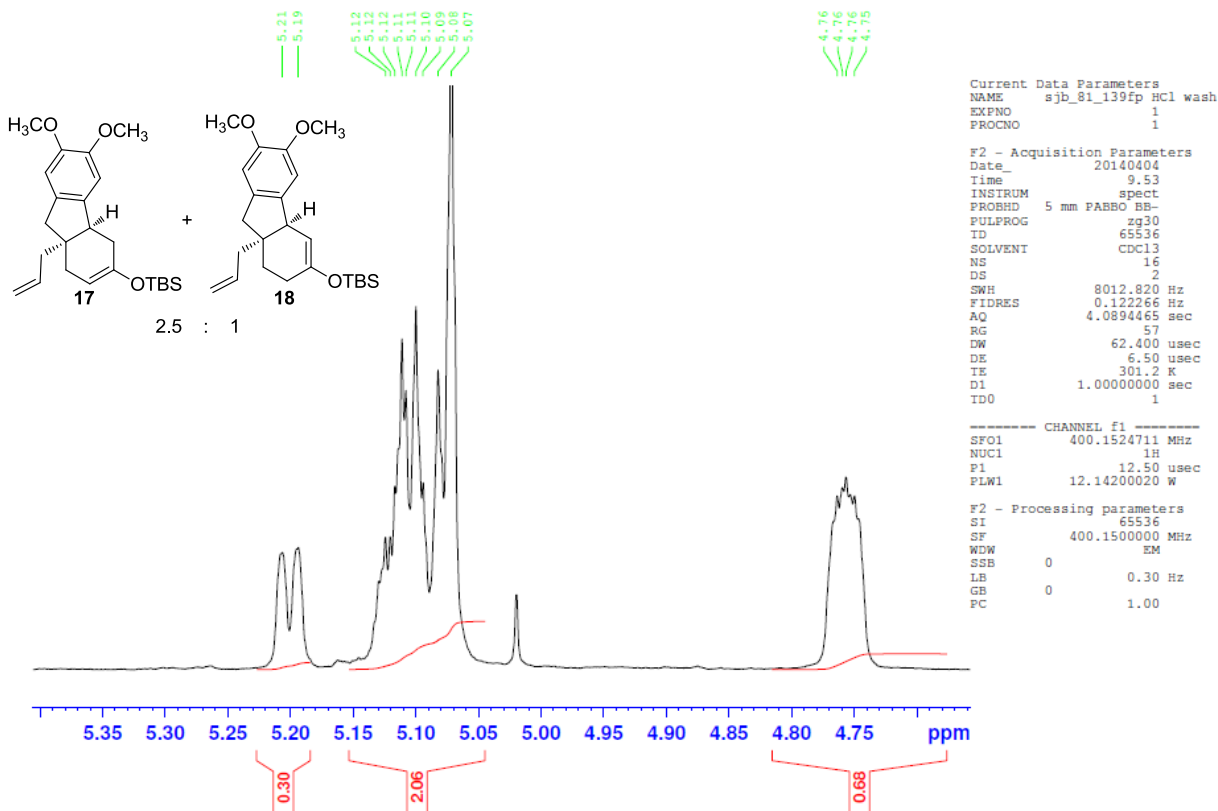

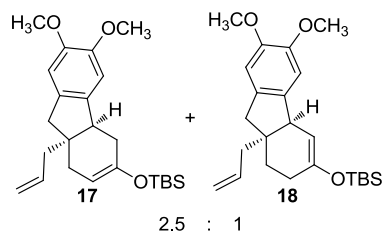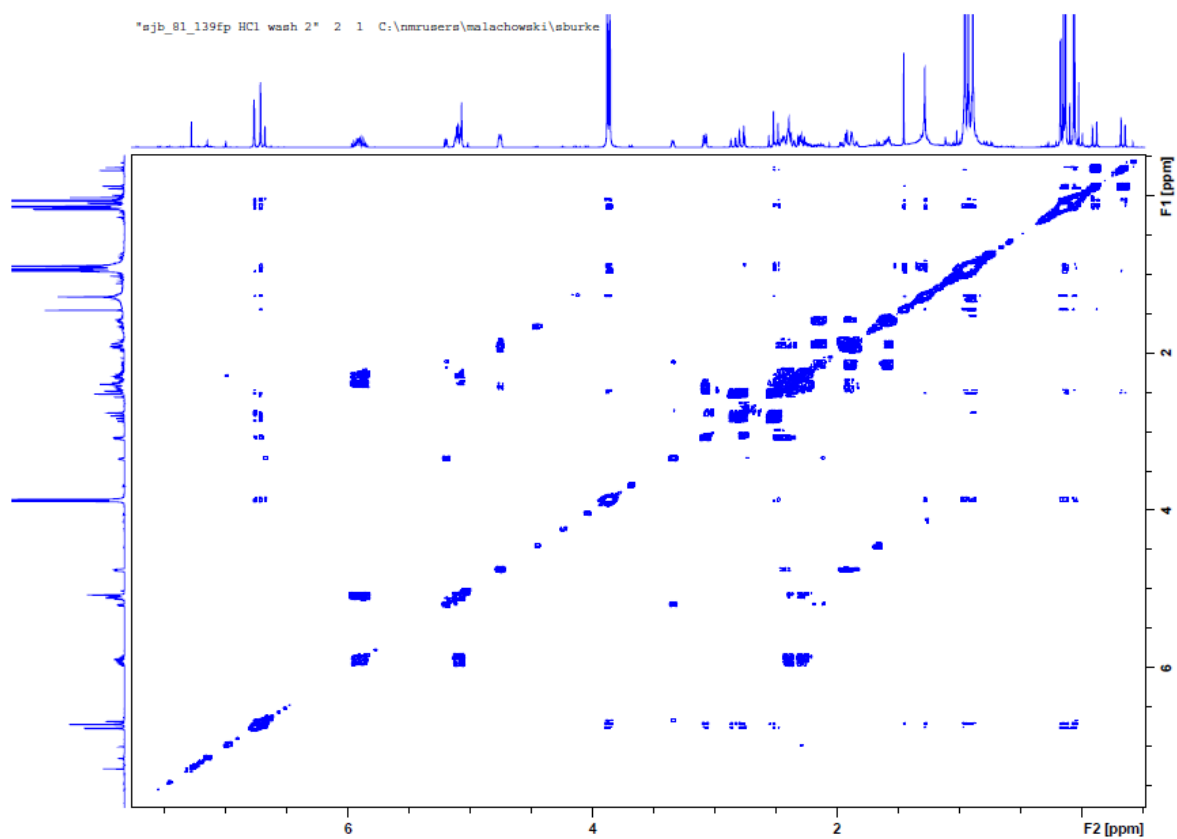

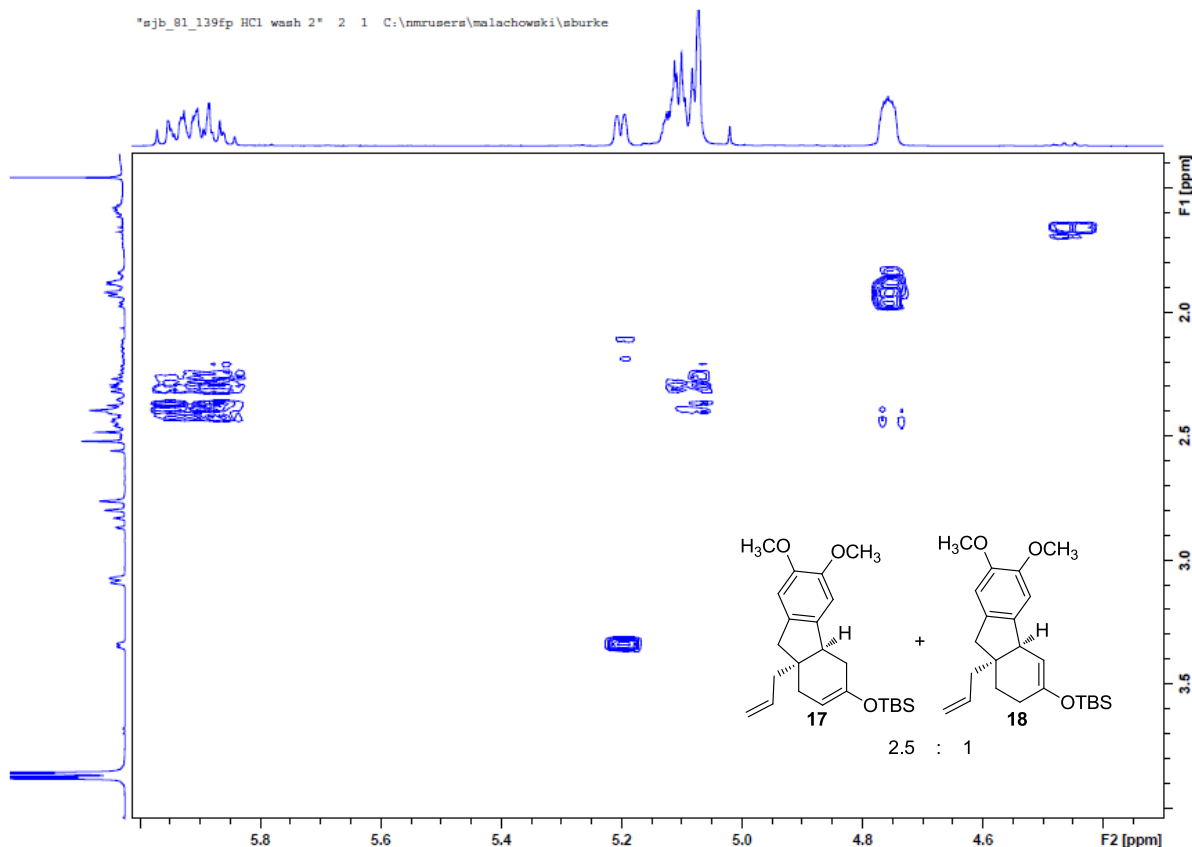

# Area Percent Report

Data Path : C:\msdchem\1\DATA\  
 Data File : sjb\_81\_139fp.D  
 Acq On : 4 Apr 2014 10:33  
 Operator : sjb  
 Sample : sjb\_81\_139fp  
 Misc :  
 ALS Vial : 100 Sample Multiplier: 1

Integration Parameters: autoint1.e  
 Integrator: ChemStation

Method : C:\msdchem\1\METHODS\ckr3.m  
 Title :

Signal : TIC: sjb\_81\_139fp.D\data.ms

| peak<br># | R.T.<br>min | first<br>scan | max<br>scan | last<br>scan | PK<br>TY | peak<br>height | corr.<br>area | corr.<br>% max. | % of<br>total |
|-----------|-------------|---------------|-------------|--------------|----------|----------------|---------------|-----------------|---------------|
| 1         | 8.833       | 737           | 743         | 748          | BV       | 449693         | 5482203       | 1.36%           | 0.899%        |
| 2         | 10.539      | 1028          | 1041        | 1044         | BV       | 22326971       | 404324493     | 100.00%         | 66.320%       |
| 3         | 10.570      | 1044          | 1047        | 1076         | VB       | 15532325       | 199850556     | 49.43%          | 32.781%       |



Abundance

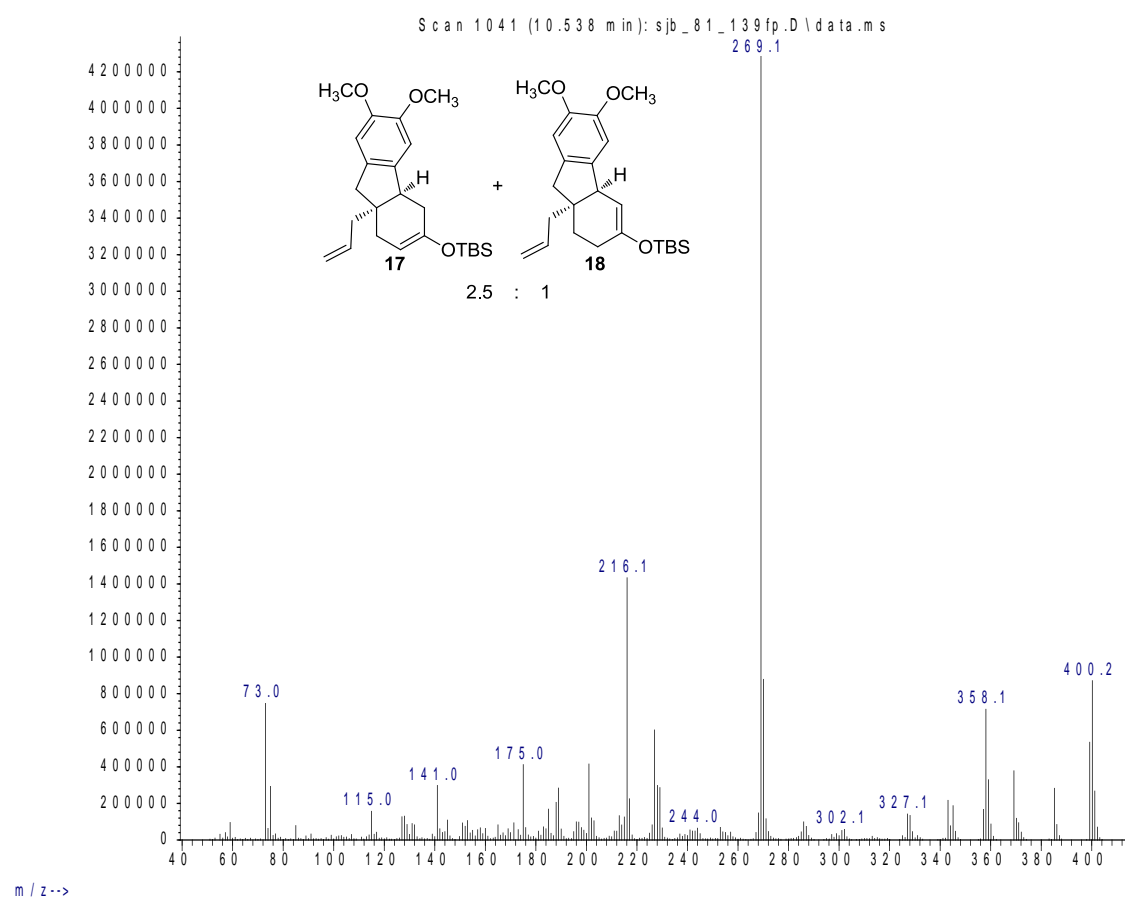

Abundance

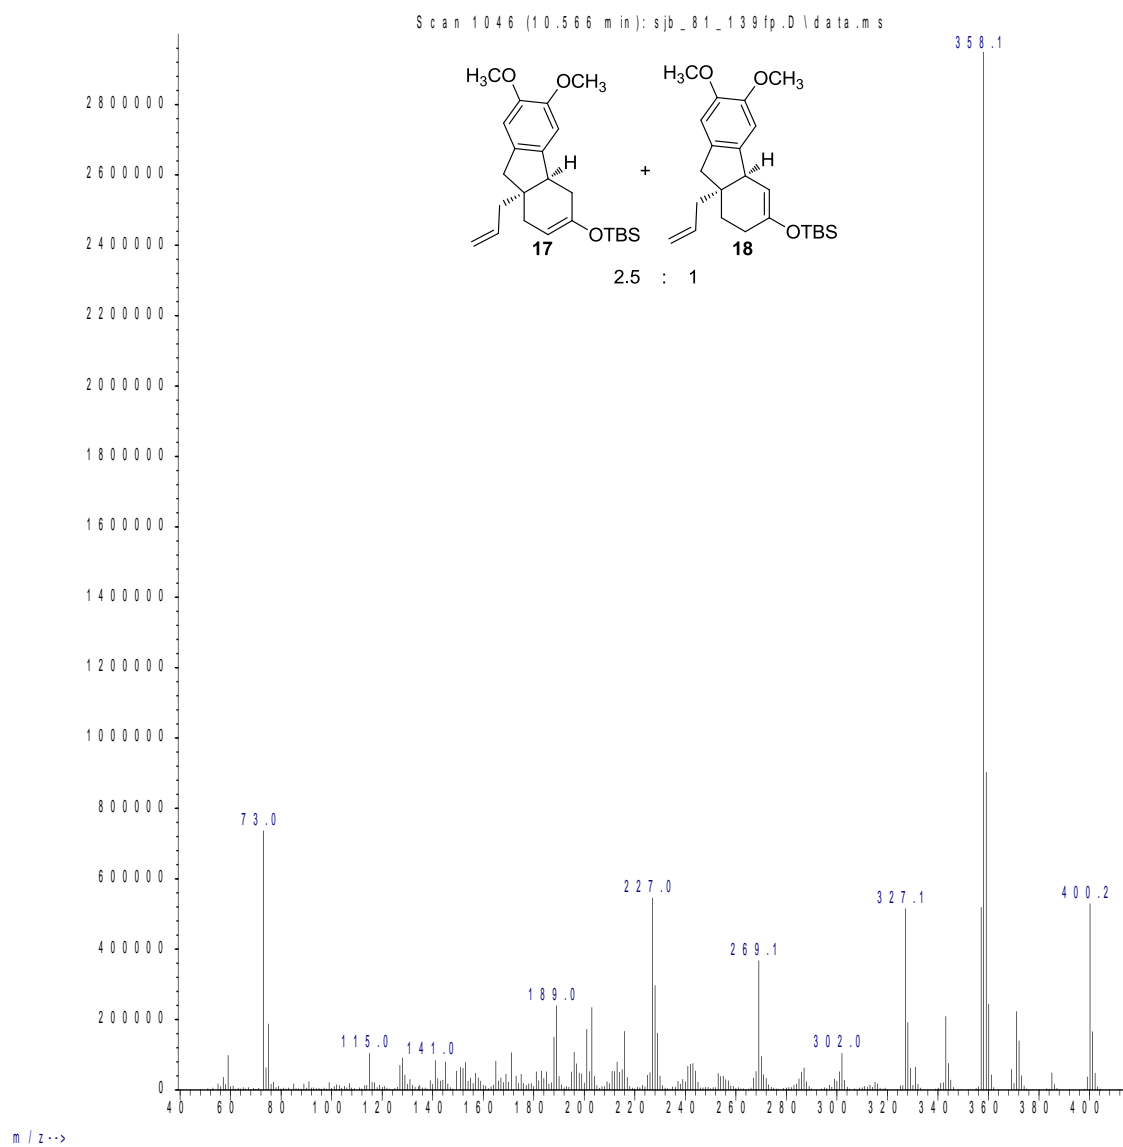

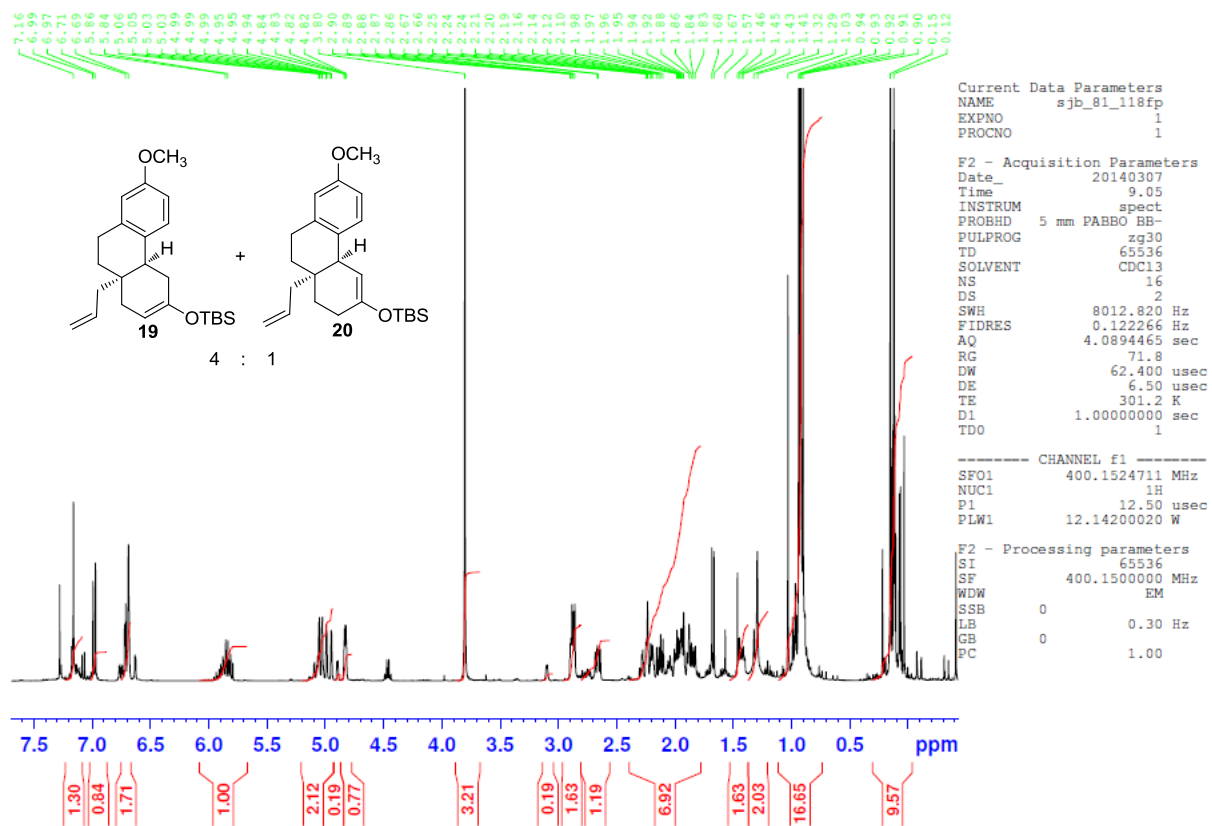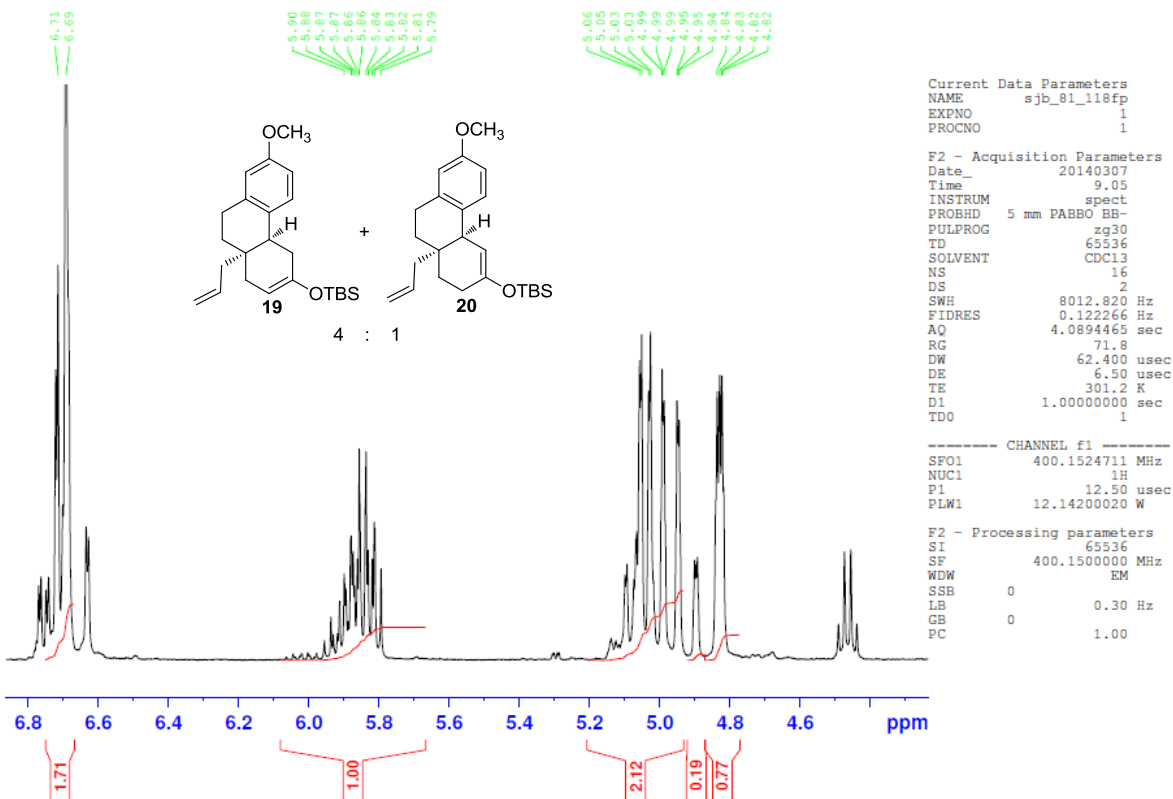

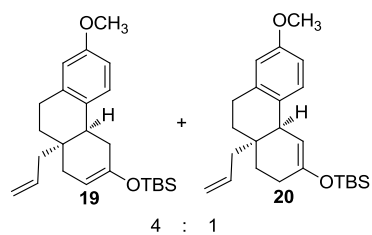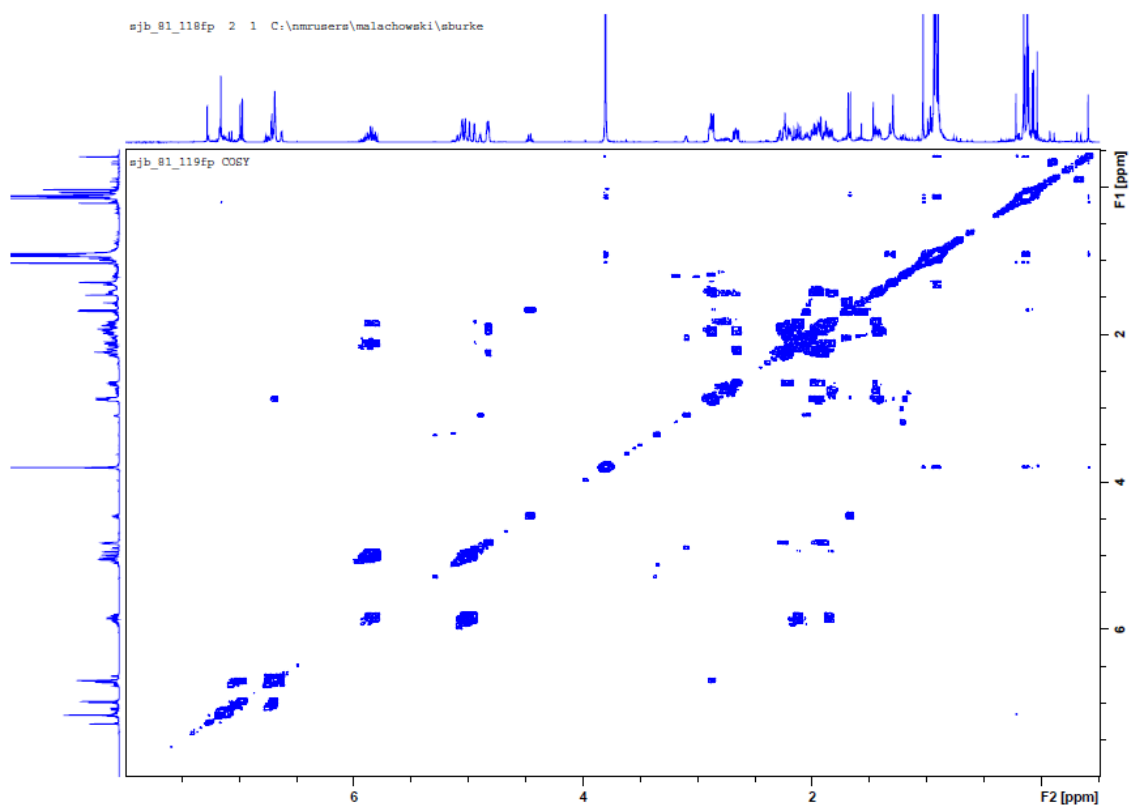

sjb\_81\_118fp 2 1 C:\nmrusers\malachowski\sburke

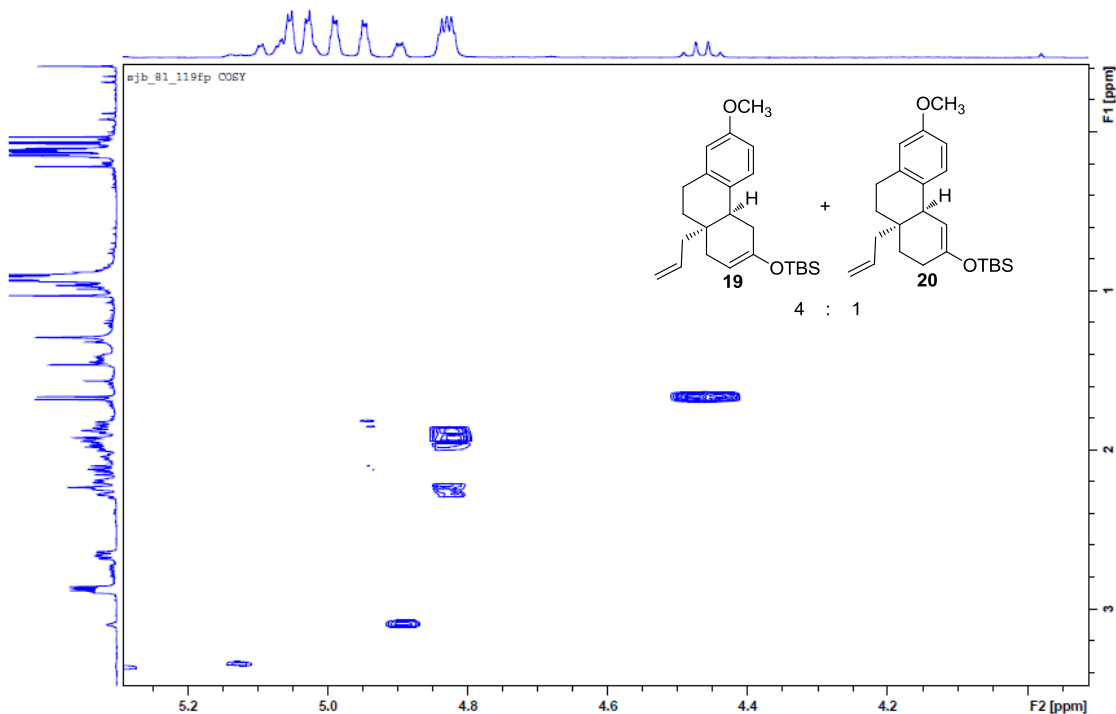

# Area Percent Report

Data Path : C:\msdchem\1\DATA\  
 Data File : sjb\_81\_118fp2.D  
 Acq On : 7 Mar 2014 10:09  
 Operator : sjb  
 Sample : sjb\_81\_118fp2  
 Misc :  
 ALS Vial : 85 Sample Multiplier: 1

Integration Parameters: autoint1.e  
 Integrator: ChemStation

Method : C:\msdchem\1\METHODS\ckr3.m  
 Title :

Signal : TIC: sjb\_81\_118fp2.D\data.ms

| peak<br># | R.T.<br>min | first<br>scan | max<br>scan | last<br>scan | PK<br>TY | peak<br>height | corr.<br>area | corr.<br>% max. | % of<br>total |
|-----------|-------------|---------------|-------------|--------------|----------|----------------|---------------|-----------------|---------------|
| 1         | 5.201       | 104           | 108         | 114          | PB 2     | 87210          | 899707        | 0.52%           | 0.342%        |
| 2         | 8.484       | 674           | 682         | 687          | PV       | 120399         | 1516861       | 0.87%           | 0.577%        |
| 3         | 8.838       | 736           | 744         | 755          | PV       | 1657895        | 20458627      | 11.73%          | 7.776%        |
| 4         | 9.977       | 936           | 943         | 948          | VV 2     | 341301         | 4863739       | 2.79%           | 1.849%        |
| 5         | 10.028      | 948           | 952         | 961          | VV       | 193154         | 3209783       | 1.84%           | 1.220%        |

|    |        |      |      |      |    |   |          |           |         |         |
|----|--------|------|------|------|----|---|----------|-----------|---------|---------|
| 6  | 10.130 | 965  | 970  | 973  | VV | 6 | 39706    | 723550    | 0.41%   | 0.275%  |
| 7  | 10.273 | 990  | 995  | 997  | VV | 5 | 131194   | 1980406   | 1.14%   | 0.753%  |
| 8  | 10.302 | 997  | 1000 | 1010 | VV | 2 | 213577   | 4417680   | 2.53%   | 1.679%  |
| 9  | 10.431 | 1010 | 1022 | 1030 | VV |   | 3434232  | 48673209  | 27.91%  | 18.499% |
| 10 | 10.508 | 1030 | 1036 | 1050 | VV |   | 13009865 | 174420154 | 100.00% | 66.291% |
| 11 | 10.611 | 1050 | 1054 | 1056 | VV | 5 | 112236   | 1948724   | 1.12%   | 0.741%  |

Sum of corrected areas: 263112441

ckr3.m Tue Mar 25 16:57:32 2014

Abundance

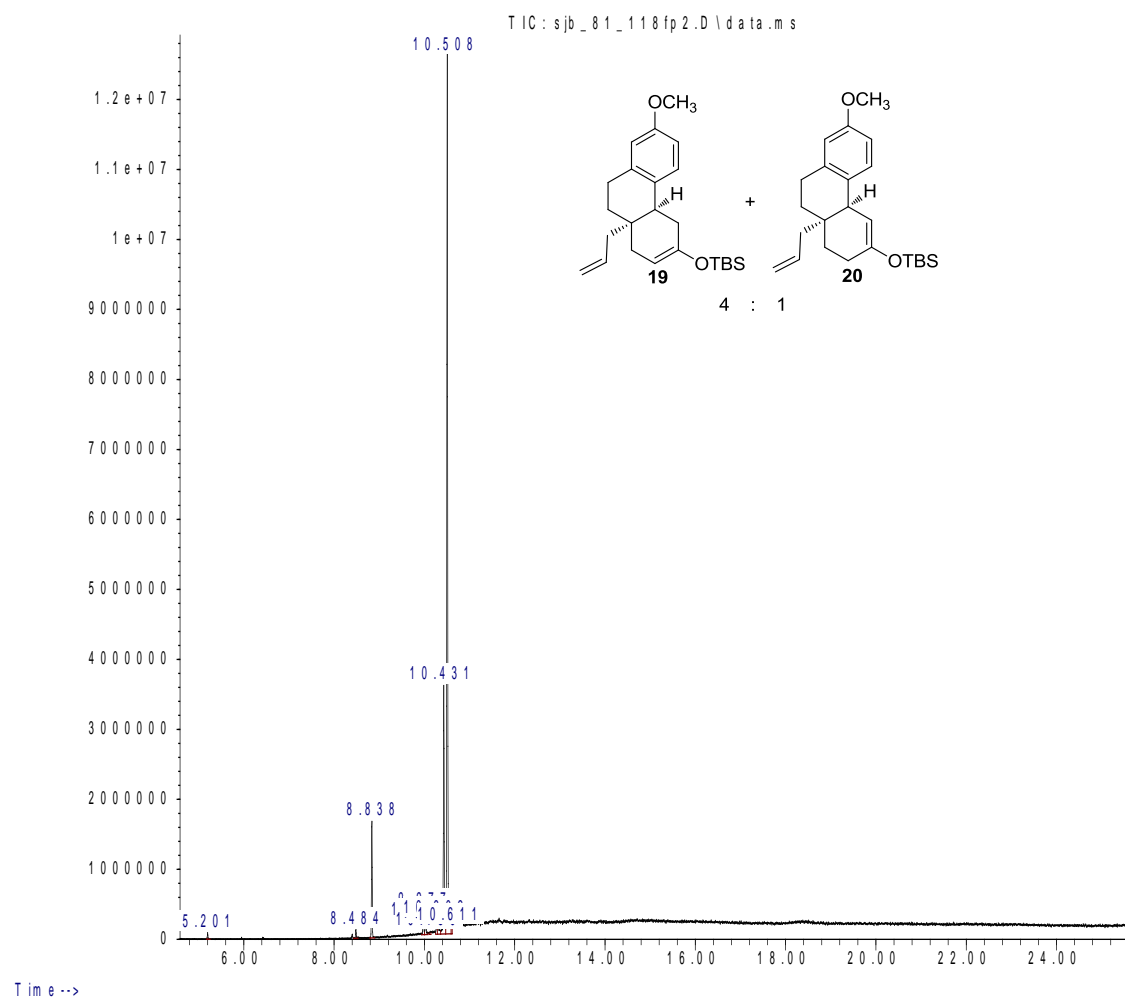

Abundance

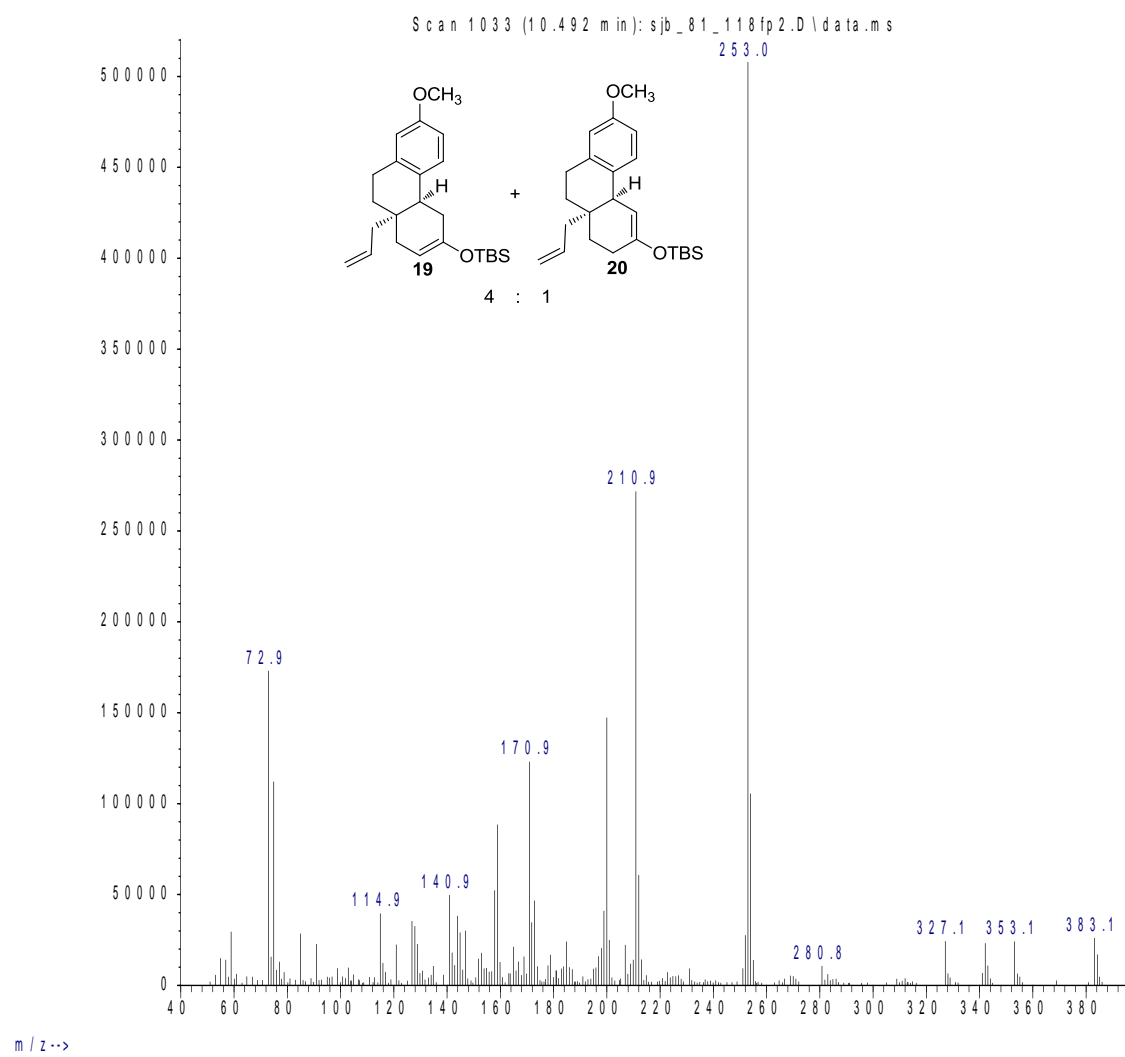

Abundance

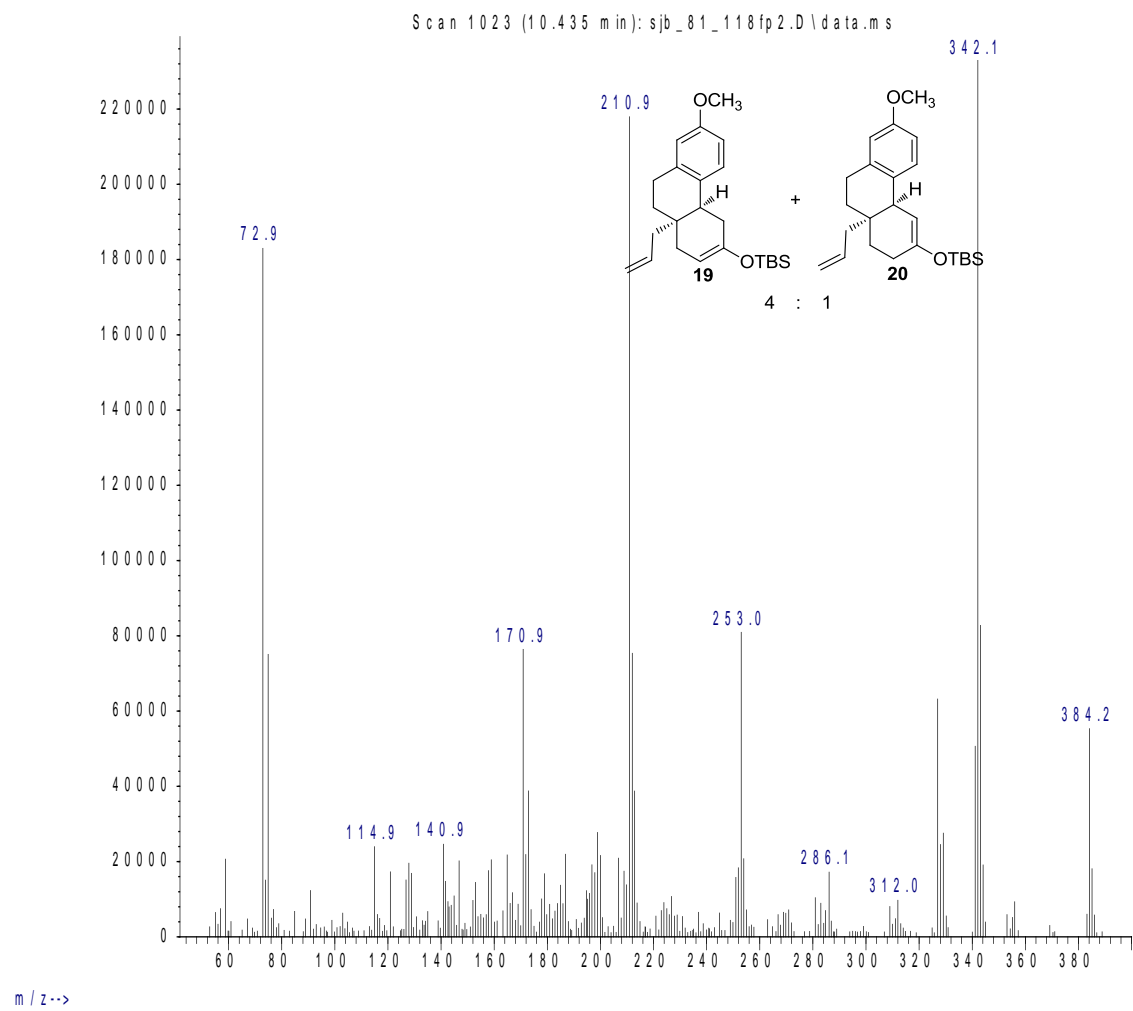

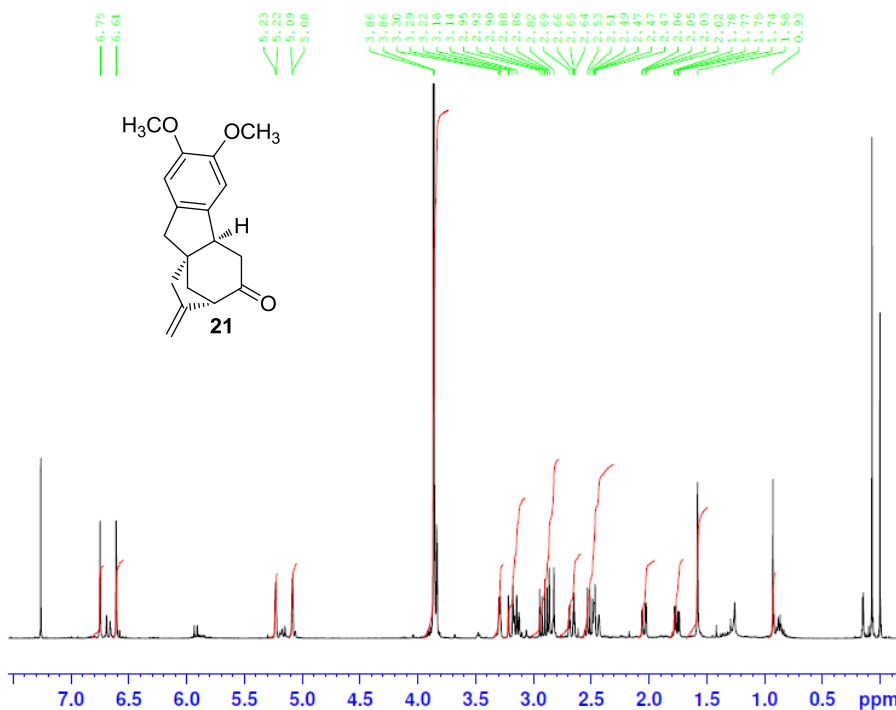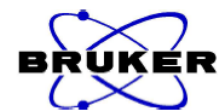

NAME sjb\_74\_180 fr3-5  
 EXPNO 1  
 PROCNO 1  
 Date\_ 20121022  
 Time 10.12  
 INSTRUM spect  
 PROBHD 5 mm DUL 13C-1  
 PULPROG zg30  
 TD 65536  
 SOLVENT CDCl<sub>3</sub>  
 NS 16  
 DS 2  
 SWH 8223.685 Hz  
 FIDRES 0.125483 Hz  
 AQ 3.9846387 sec  
 RG 203  
 DW 60.800 usec  
 DE 6.50 usec  
 TE 301.2 K  
 D1 1.00000000 sec  
 TD0 1

===== CHANNEL f1 =====  
 NUC1 1H  
 P1 9.80 usec  
 PL1 -4.00 dB  
 PL1W 19.24419975 W  
 SFO1 400.1524711 MHz  
 SI 32768  
 SF 400.1500084 MHz  
 WDW EM  
 SSB 0  
 LB 0.30 Hz  
 GB 0  
 PC 1.00

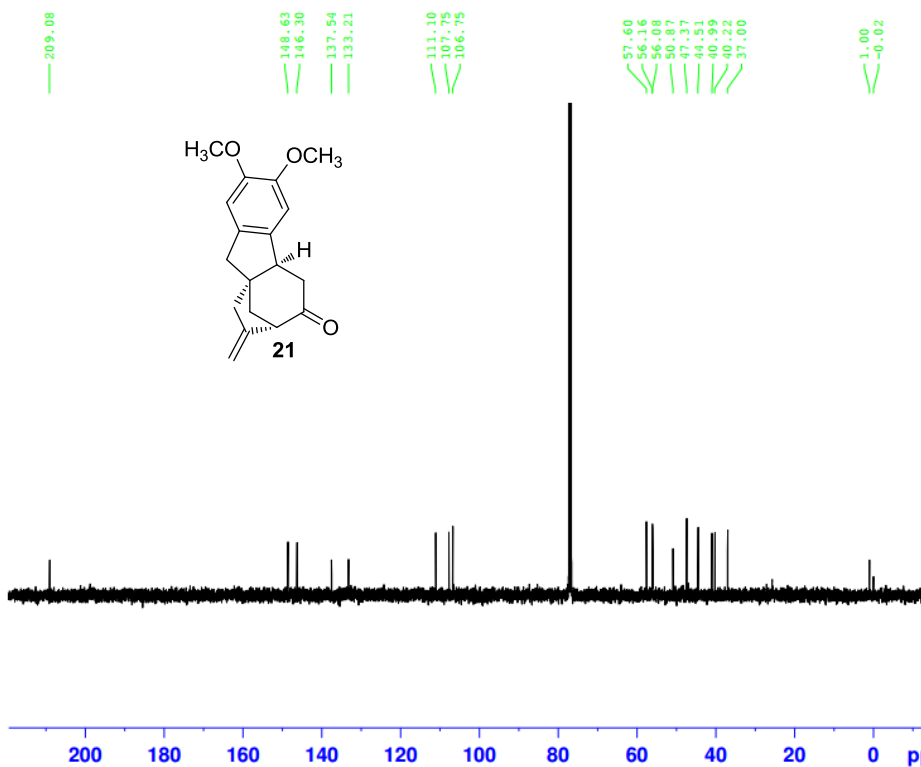

Current Data Parameters  
 NAME sjb\_74\_180 fr 3-5 13C  
 EXPNO 1  
 PROCNO 1

F2 - Acquisition Parameters  
 Date\_ 20121022  
 Time 11.38  
 INSTRUM spect  
 PROBHD 5 mm DUL 13C-1  
 PULPROG zgpg30  
 TD 65536  
 SOLVENT CDCl<sub>3</sub>  
 NS 256  
 DS 4  
 SWH 24038.461 Hz  
 FIDRES 0.366798 Hz  
 AQ 1.3631488 sec  
 RG 203  
 DW 20.800 usec  
 DE 6.50 usec  
 TE 301.2 K  
 D1 2.00000000 sec  
 D11 0.03000000 sec  
 TD0 1

===== CHANNEL f1 =====  
 NUC1 13C  
 P1 9.00 usec  
 PL1 0 dB  
 PL1W 35.41759872 W  
 SFO1 100.6278593 MHz  
 ===== CHANNEL f2 =====  
 CPDPRG2 waltz16  
 NUC2 1H  
 PCPD2 80.00 usec  
 PL2 -3.80 dB  
 PL12 13.80 dB  
 PL13 13.80 dB  
 PL2W 18.37806702 W  
 PL12W 0.31937420 W  
 PL13W 0.31937420 W  
 SFO2 400.1516006 MHz

F2 - Processing parameters  
 SI 32768  
 SF 100.6177980 MHz  
 WDW EM  
 SSB 0  
 LB 1.00 Hz  
 GB 0  
 PC 1.40

Area Percent Report

Data Path : C:\msdchem\1\DATA\  
Data File : sjb\_74\_180 fr3-5.D  
Acq On : 19 Oct 2012 11:34  
Operator : sjb  
Sample : sjb\_74\_180 fr3-5  
Misc :  
ALS Vial : 10 Sample Multiplier: 1

Integration Parameters: autoint1.e  
Integrator: ChemStation

Method : C:\msdchem\1\METHODS\ckr3.m  
Title :

Signal : TIC: sjb\_74\_180 fr3-5.D\data.ms

| peak<br># | R.T.<br>min | first<br>scan | max<br>scan | last<br>scan | PK<br>TY | peak<br>height | corr.<br>area | corr.<br>% max. | % of<br>total |
|-----------|-------------|---------------|-------------|--------------|----------|----------------|---------------|-----------------|---------------|
| 1         | 9.494       | 850           | 859         | 872          | BV       | 798947         | 11914481      | 5.98%           | 5.277%        |
| 2         | 9.969       | 931           | 942         | 967          | BV       | 11427409       | 199102091     | 100.00%         | 88.184%       |
| 3         | 10.725      | 1063          | 1074        | 1082         | BV       | 1129946        | 14764330      | 7.42%           | 6.539%        |

Sum of corrected areas: 225780902

ckr3.m Mon Apr 07 17:09:08 2014

Abundance

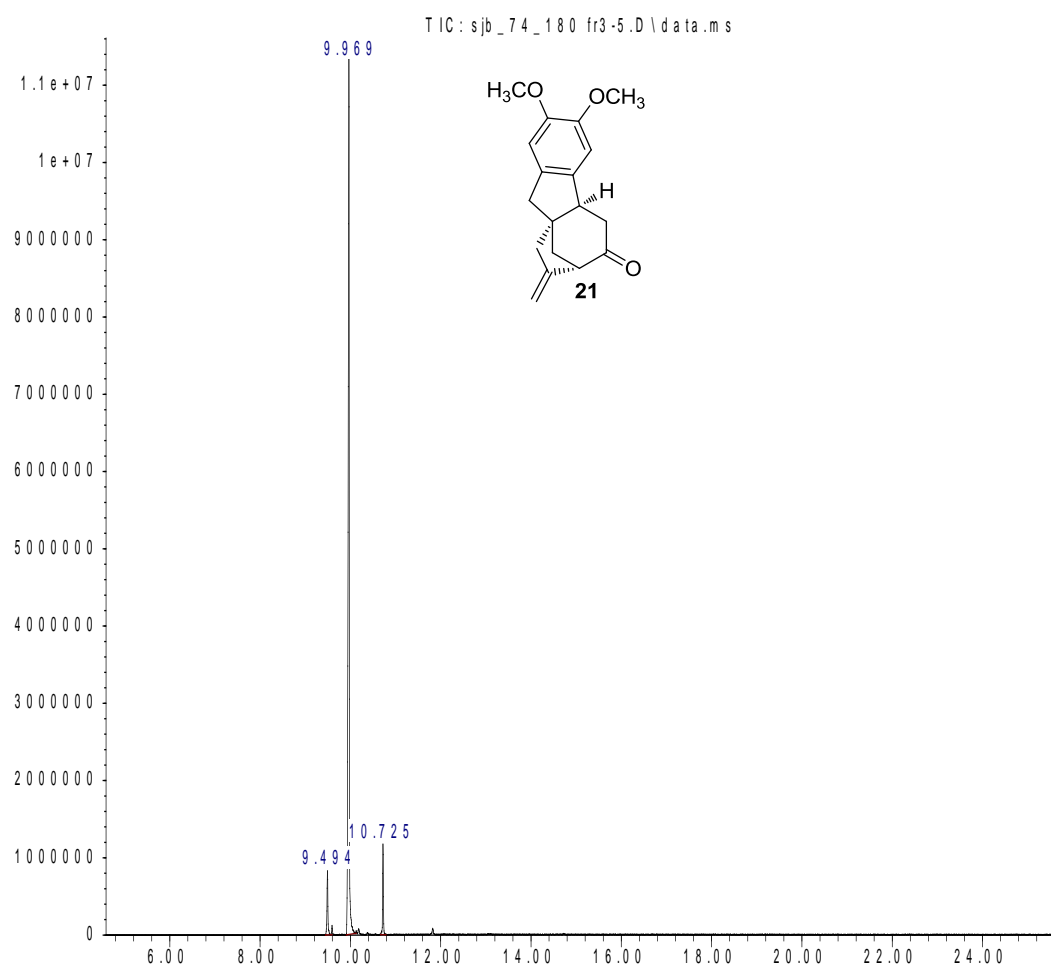

Abundance

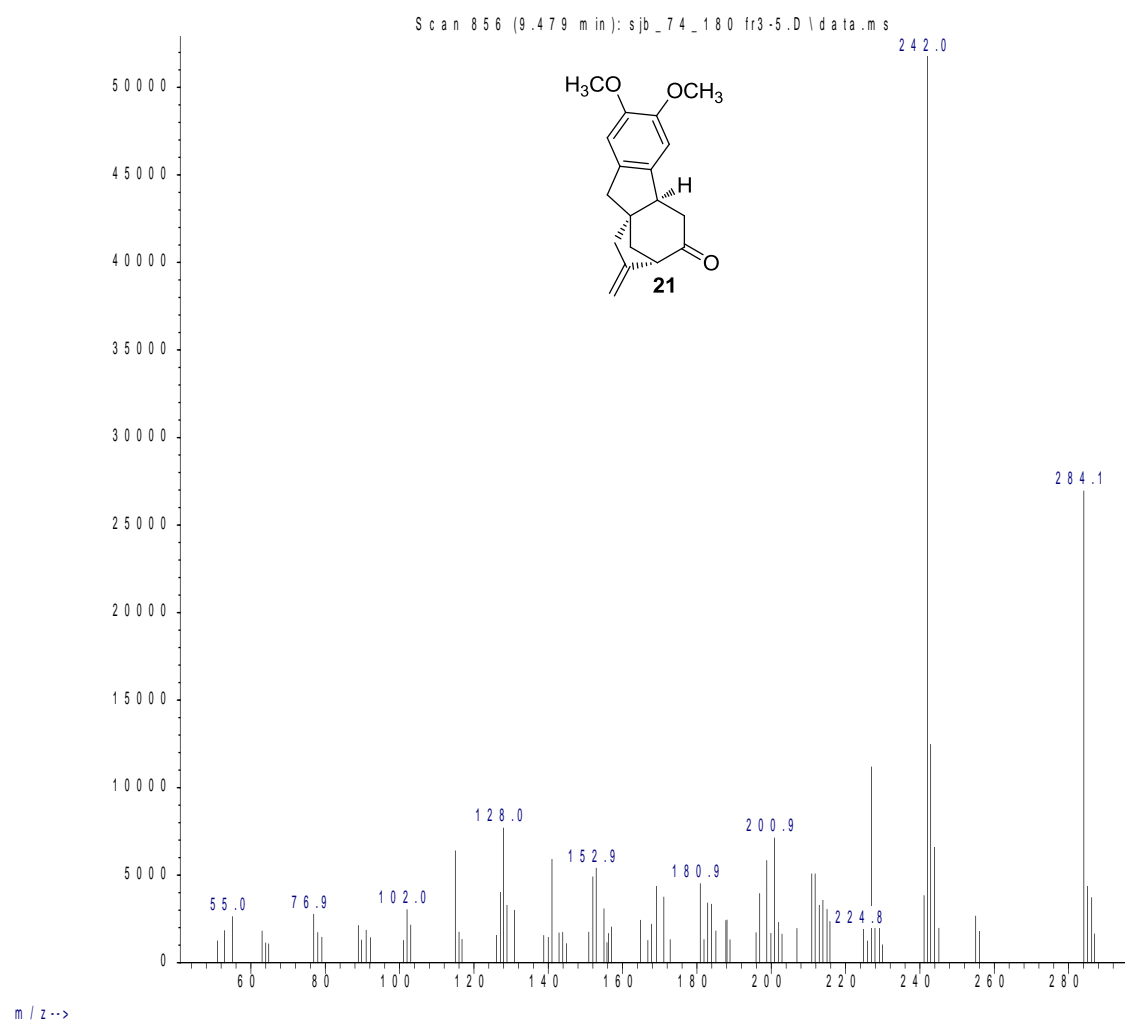

Abundance

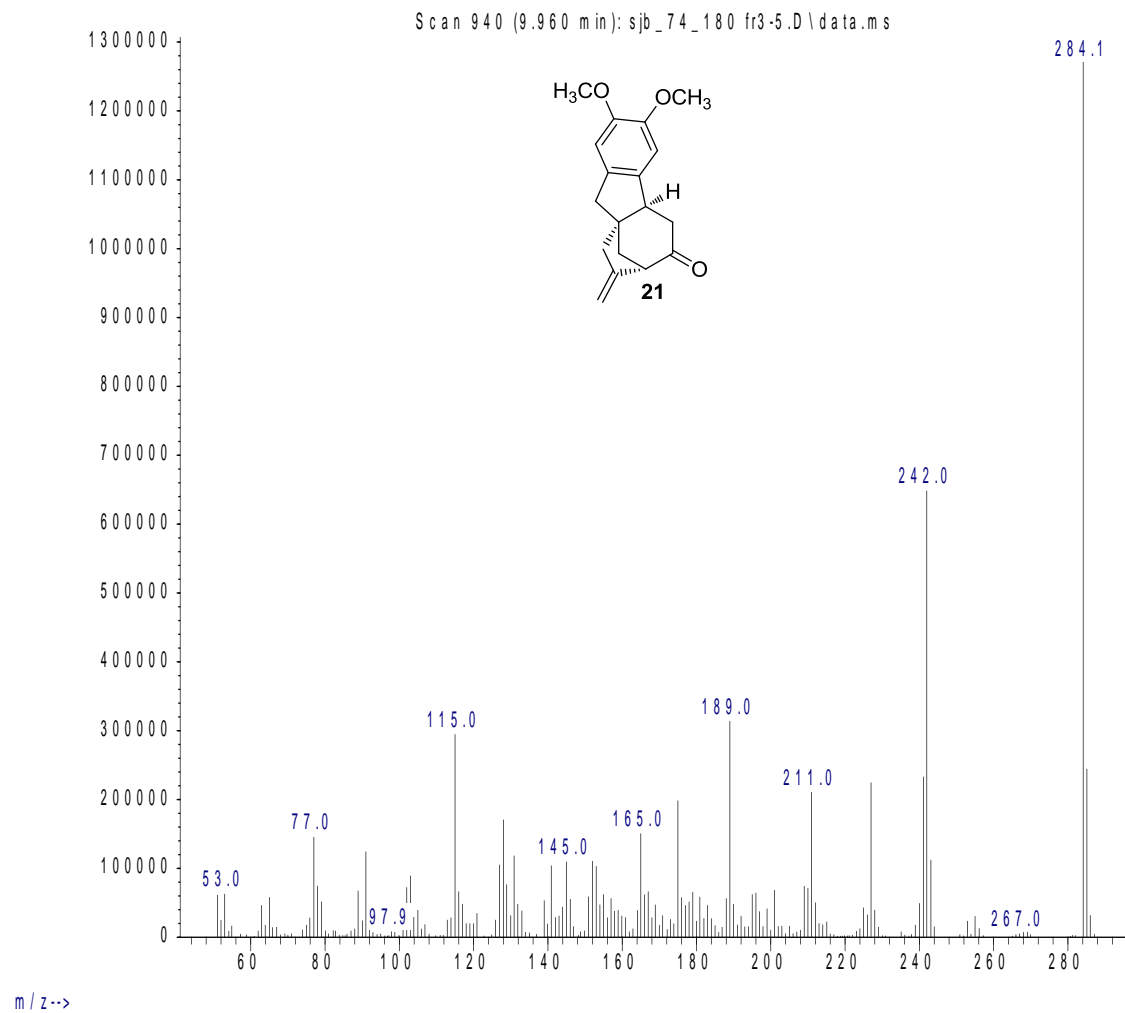

Abundance

Scan 1073 (10.721 min): sjb\_74\_180 fr3-5.D\data.ms

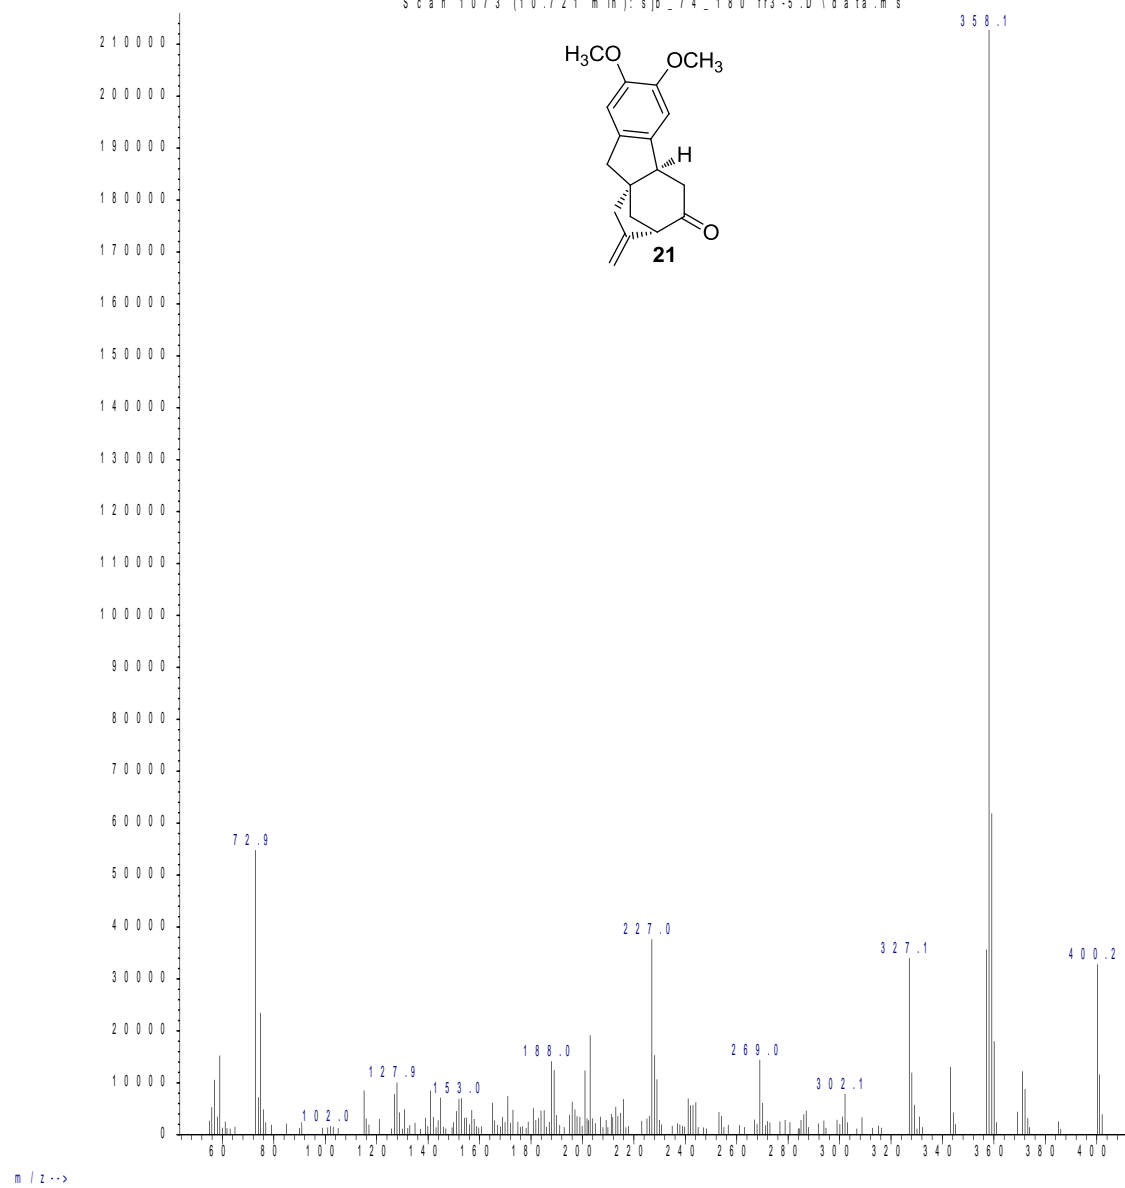

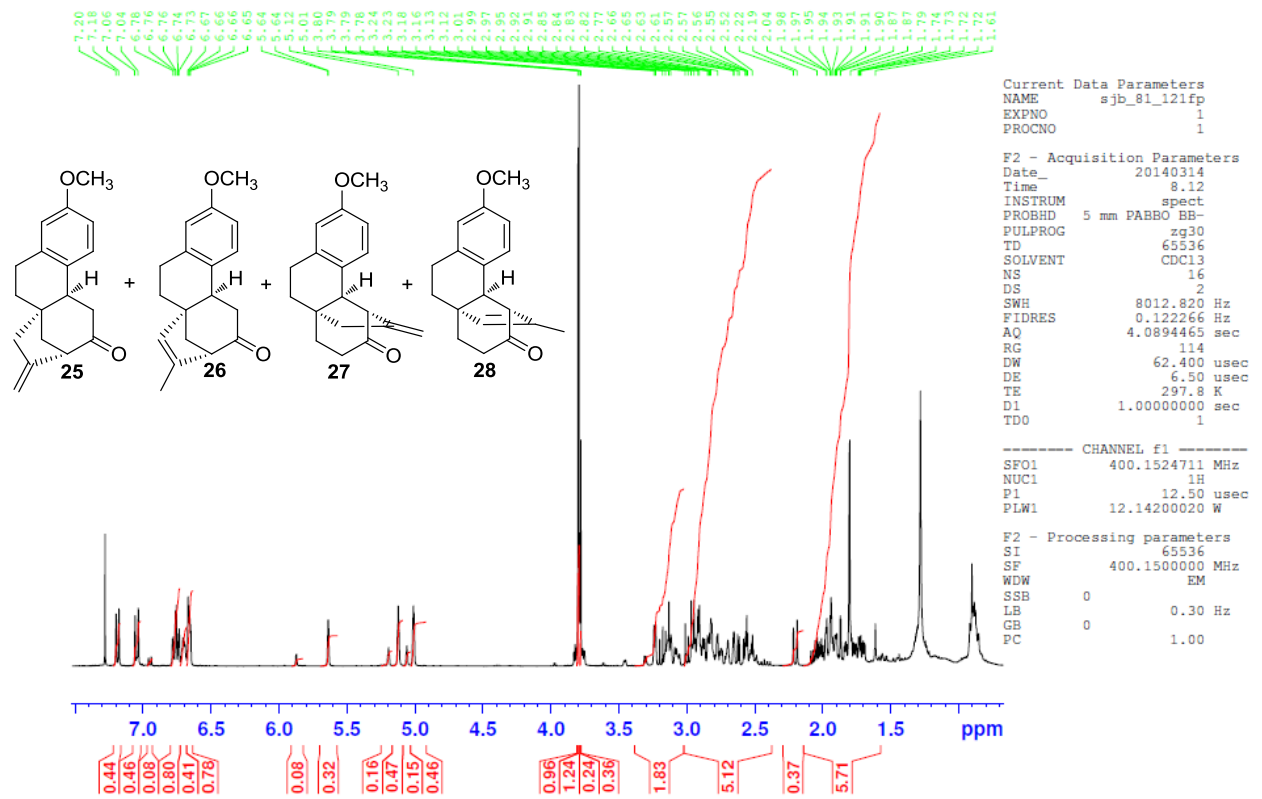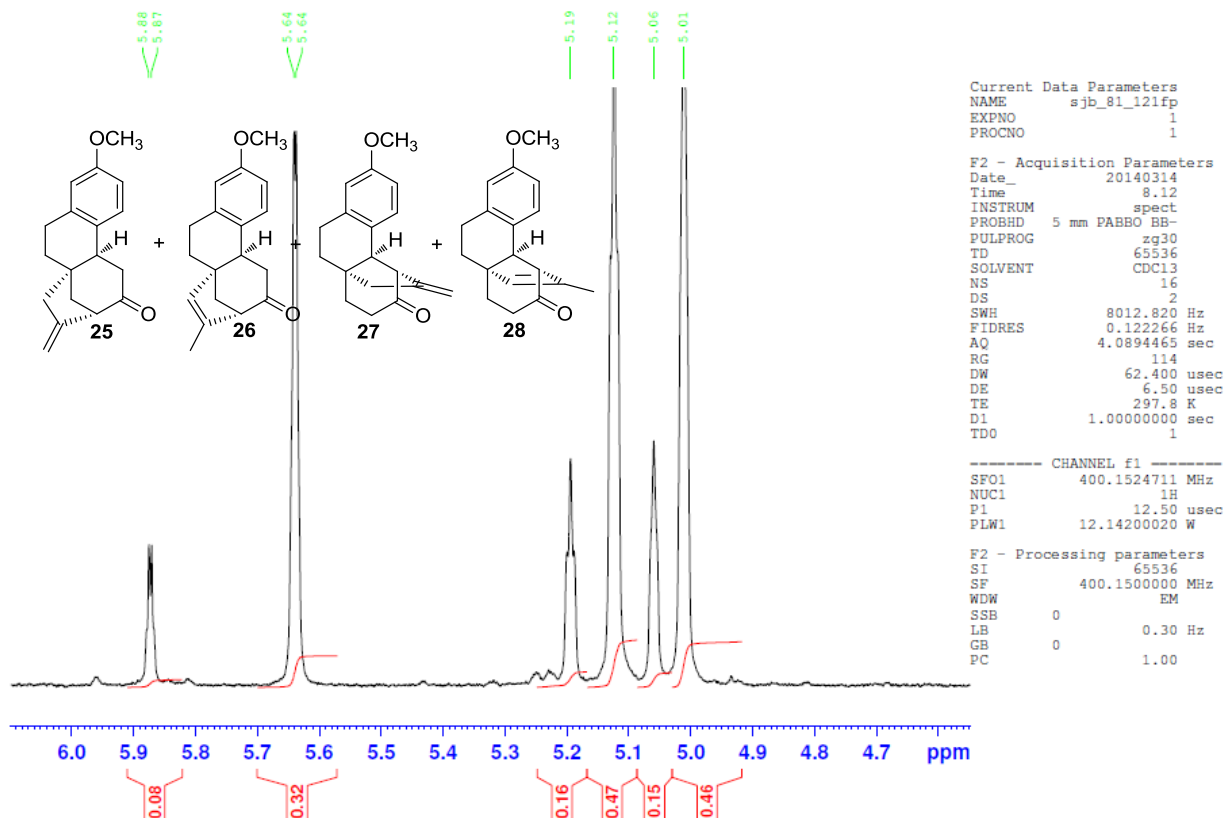

# Area Percent Report

Data Path : C:\msdchem\1\DATA\  
 Data File : sjb\_81\_121fp.D  
 Acq On : 14 Mar 2014 9:05  
 Operator : sjb  
 Sample : sjb\_81\_121fp  
 Misc :  
 ALS Vial : 90 Sample Multiplier: 1

Integration Parameters: autoint1.e  
 Integrator: ChemStation

Method : C:\msdchem\1\METHODS\ckr3.m  
 Title :

Signal : TIC: sjb\_81\_121fp.D\data.ms

| peak<br># | R.T.<br>min | first<br>scan | max<br>scan | last<br>scan | PK<br>TY | peak<br>height | corr.<br>area | corr.<br>% max. | % of<br>total |
|-----------|-------------|---------------|-------------|--------------|----------|----------------|---------------|-----------------|---------------|
| ---       | -----       | -----         | -----       | -----        | ---      | -----          | -----         | -----           | -----         |
| 1         | 8.867       | 743           | 749         | 758          | BV       | 3522428        | 56027446      | 14.44%          | 6.629%        |
| 2         | 8.942       | 758           | 762         | 782          | VB 4     | 398136         | 10292277      | 2.65%           | 1.218%        |
| 3         | 9.218       | 805           | 810         | 818          | BV 2     | 561113         | 10095541      | 2.60%           | 1.195%        |
| 4         | 9.298       | 818           | 824         | 863          | VV 2     | 22894893       | 387965102     | 100.00%         | 45.906%       |
| 5         | 9.594       | 867           | 876         | 917          | VV       | 24458757       | 380749882     | 98.14%          | 45.052%       |

Sum of corrected areas: 845130248

ckr3.m Thu Mar 27 12:26:01 2014

Abundance

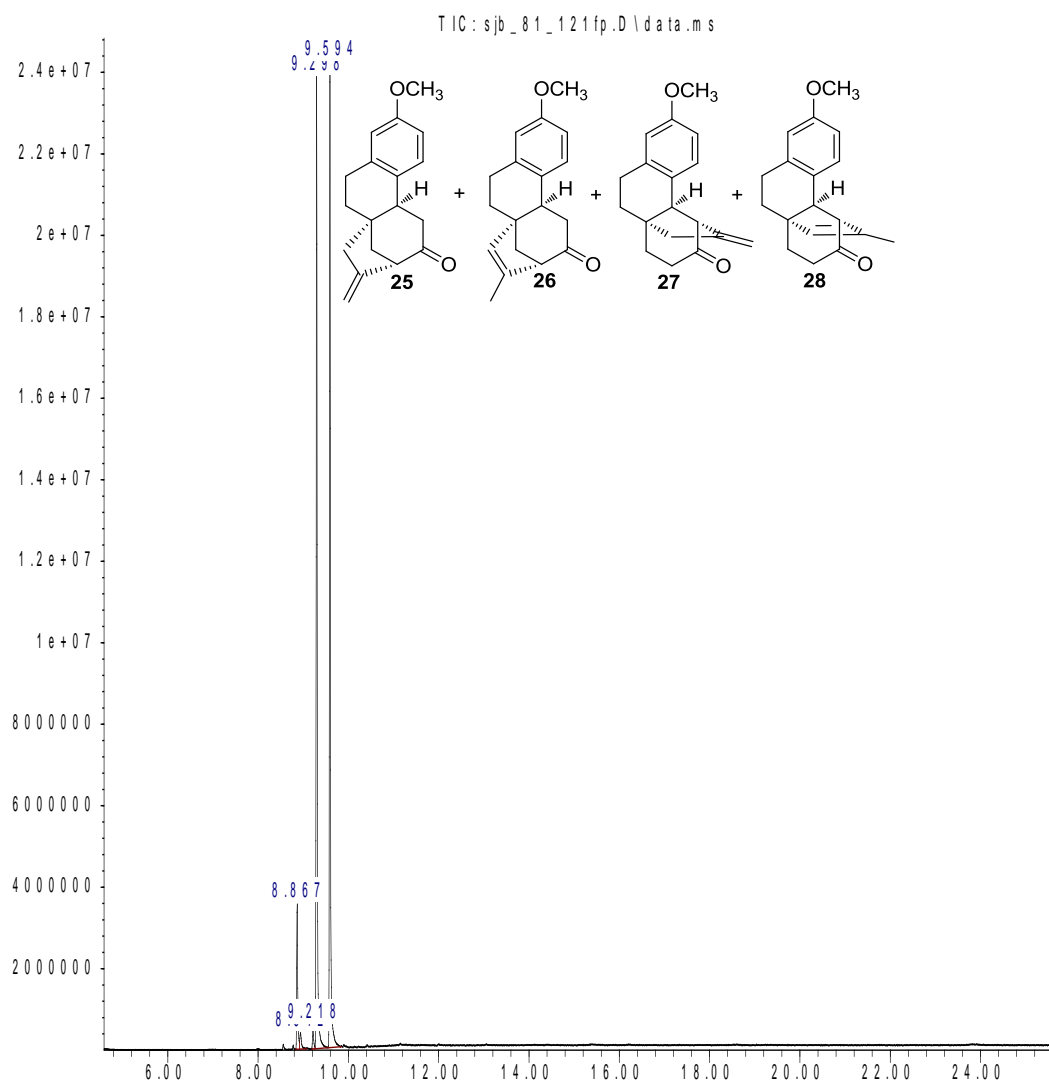

Time-->

Abundance

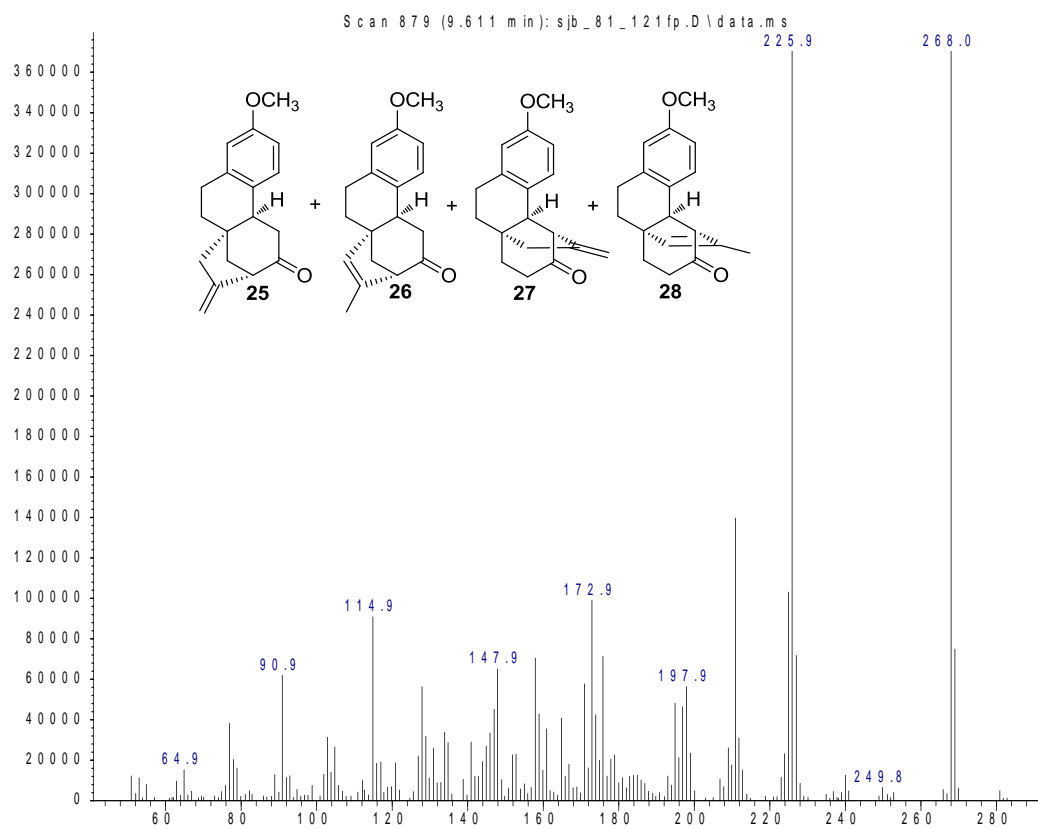

m/z-->

Abundance

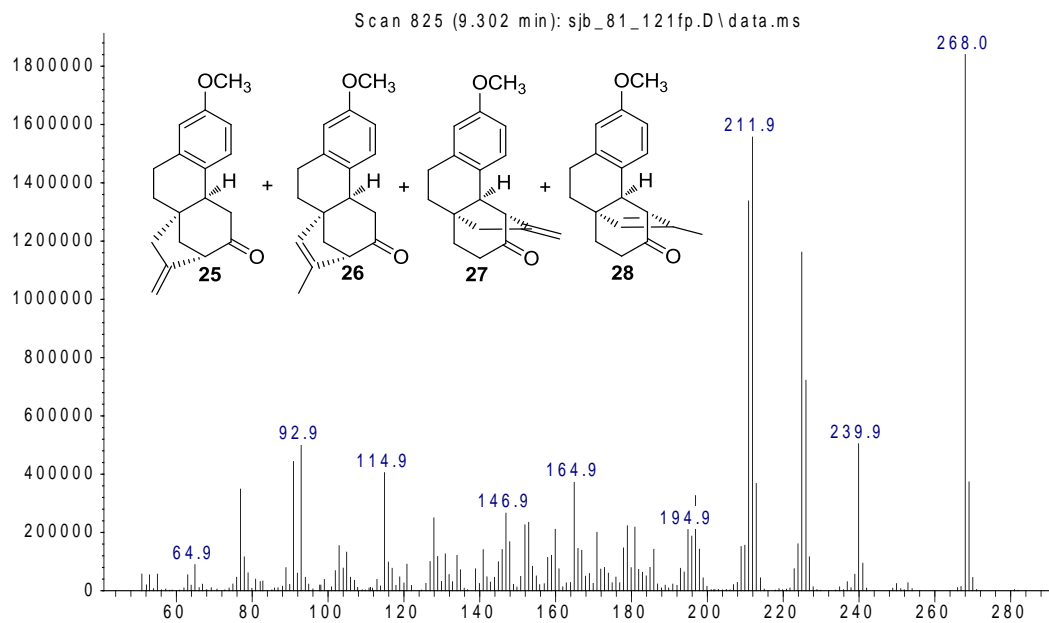

m/z-->

Abundance

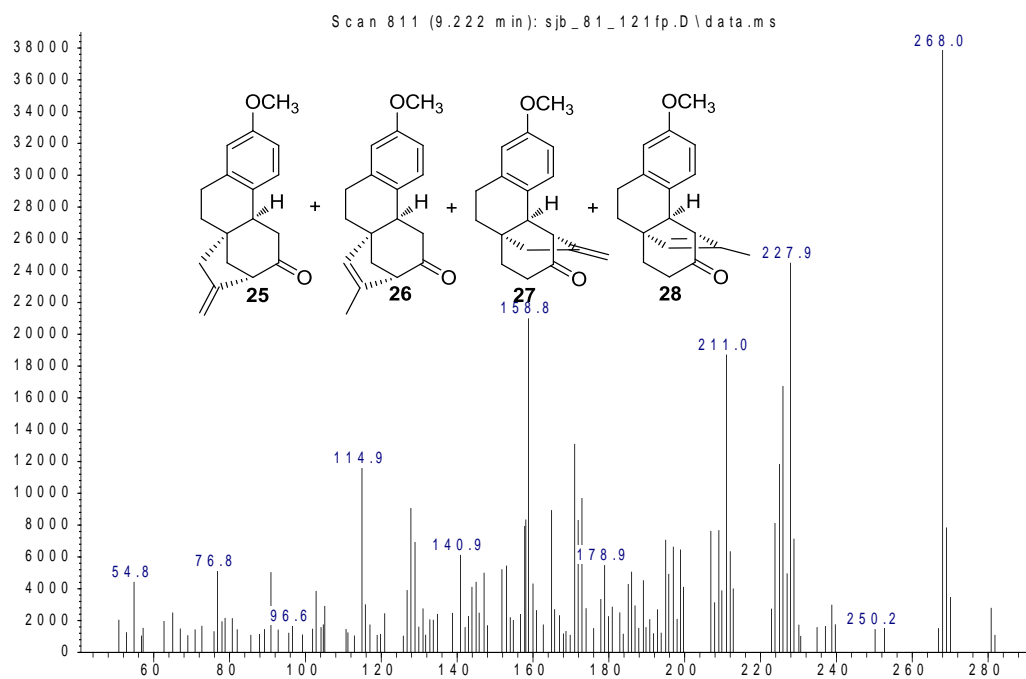

m/z-->

Abundance

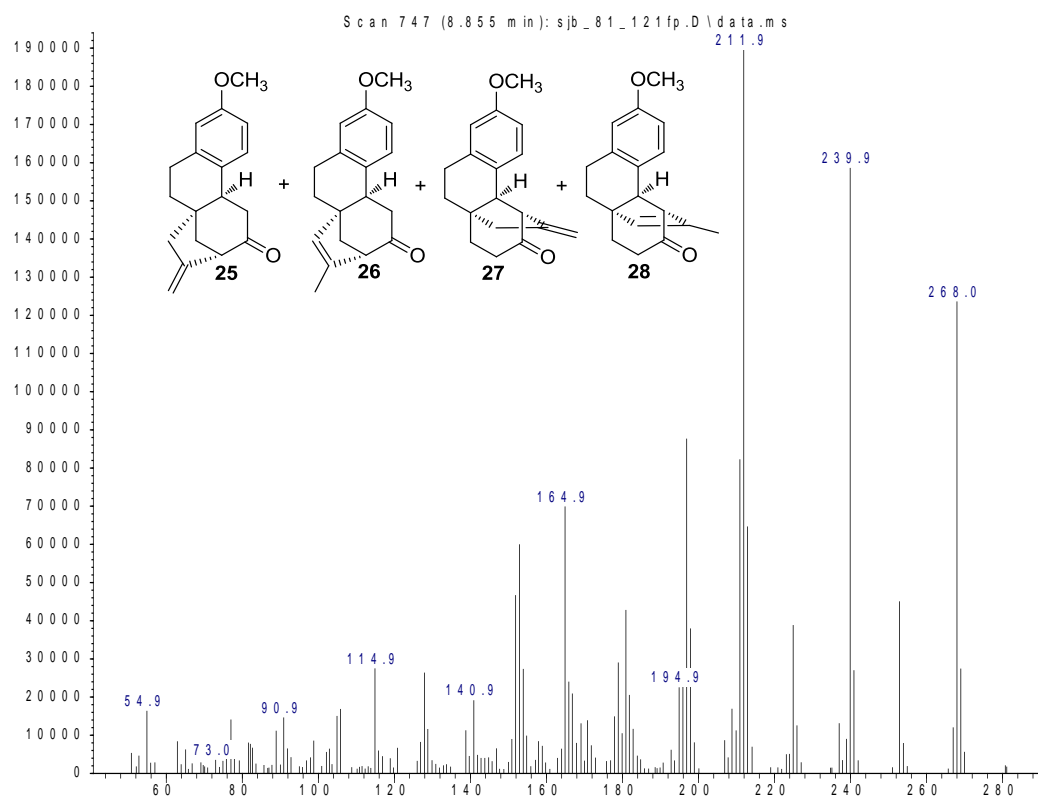

m/z-->

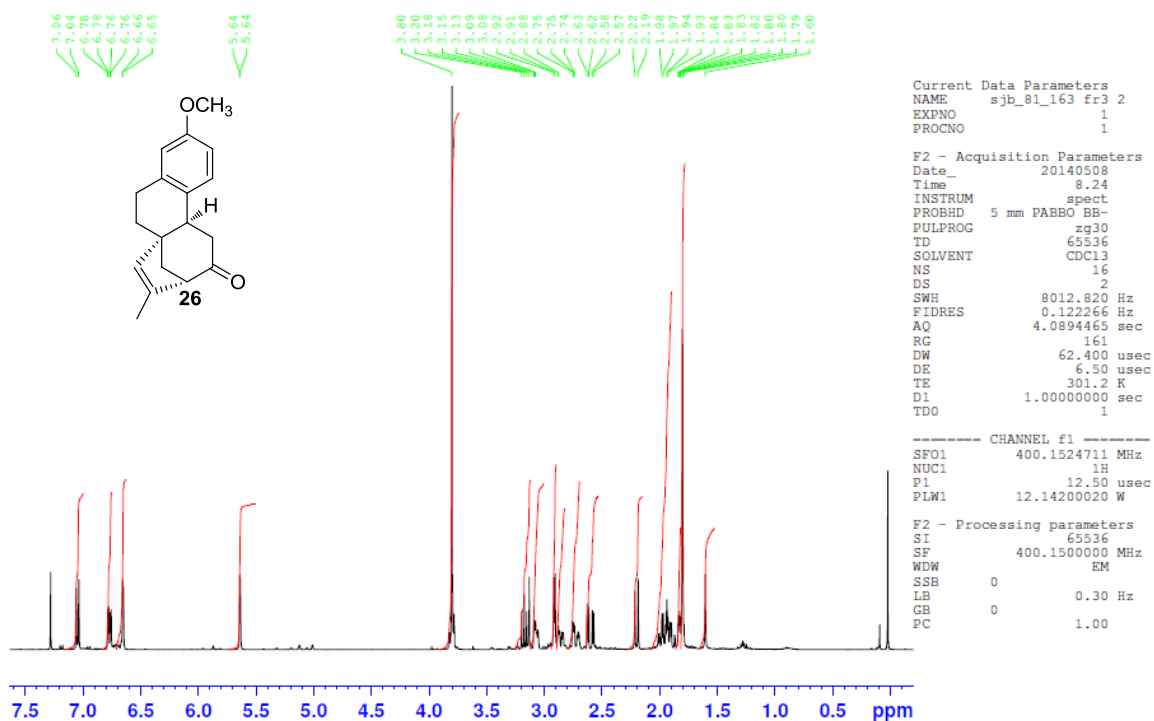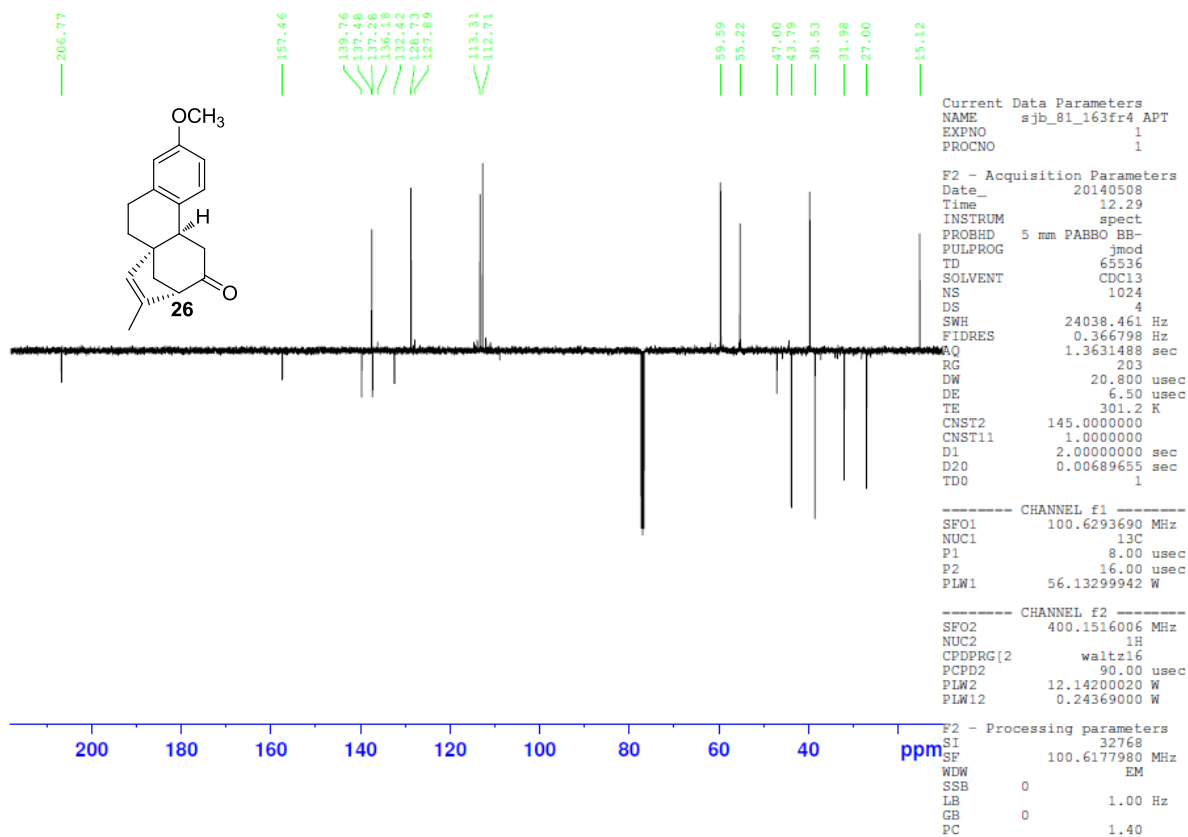

# Area Percent Report

Data Path : C:\msdchem\1\DATA\  
 Data File : sjb\_81\_163 fr4.D  
 Acq On : 7 May 2014 16:54  
 Operator : sjb  
 Sample : sjb\_81\_163 fr4  
 Misc :  
 ALS Vial : 100 Sample Multiplier: 1

Integration Parameters: autoint1.e  
 Integrator: ChemStation

Method : C:\msdchem\1\METHODS\ckr3.m  
 Title :

Signal : TIC: sjb\_81\_163 fr4.D\data.ms

| peak<br># | R.T.<br>min | first<br>scan | max<br>scan | last<br>scan | PK<br>TY | peak<br>height | corr.<br>area | corr.<br>% max. | % of<br>total |
|-----------|-------------|---------------|-------------|--------------|----------|----------------|---------------|-----------------|---------------|
| 1         | 8.861       | 743           | 748         | 757          | BV       | 436595         | 6037089       | 1.74%           | 1.626%        |
| 2         | 9.316       | 817           | 827         | 862          | VB       | 18042696       | 347130619     | 100.00%         | 93.508%       |
| 3         | 9.585       | 867           | 875         | 897          | BB       | 1151425        | 18062141      | 5.20%           | 4.865%        |

Sum of corrected areas: 371229849

ckr3.m Mon May 12 15:24:00 2014

Abundance

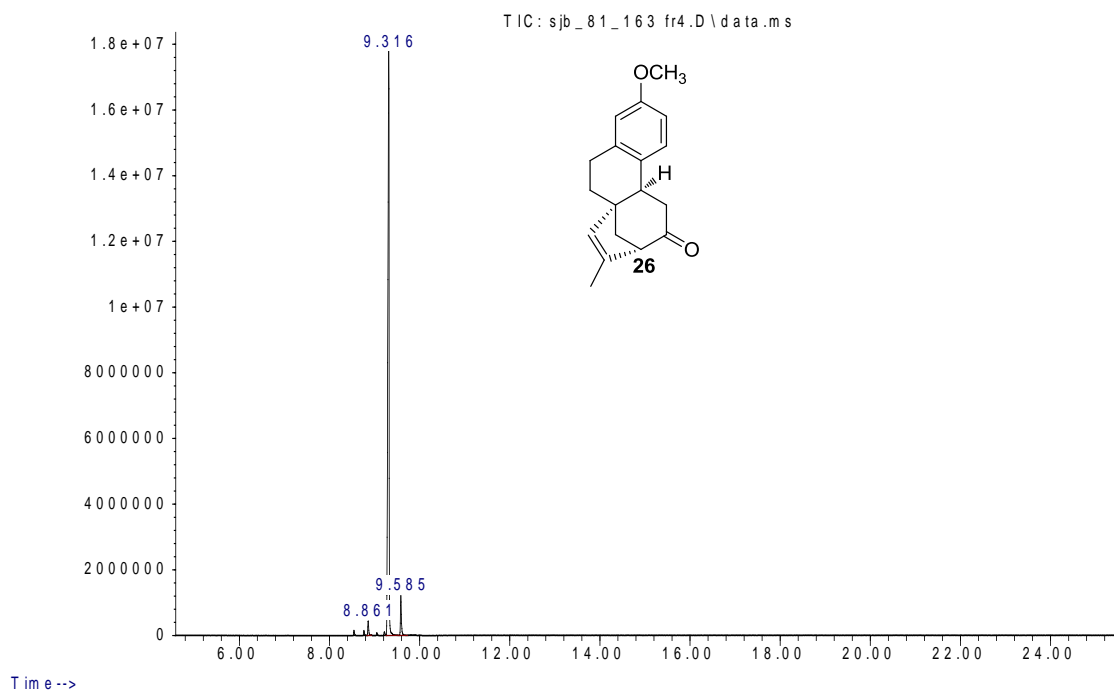

Abundance

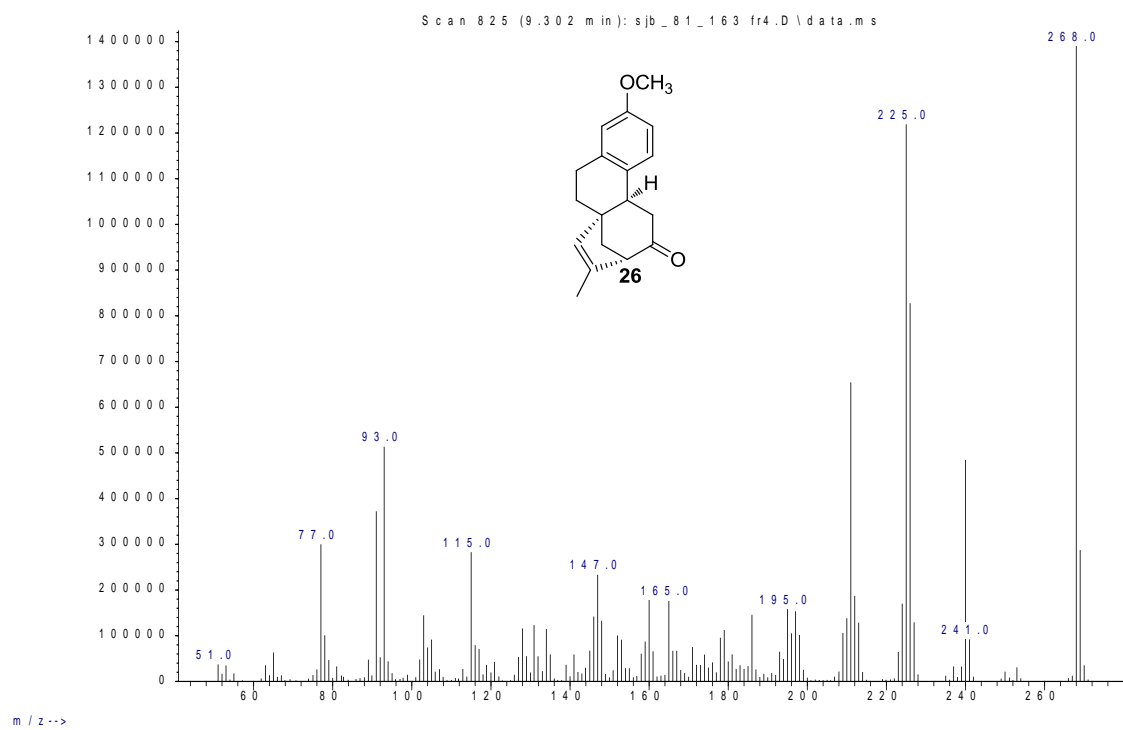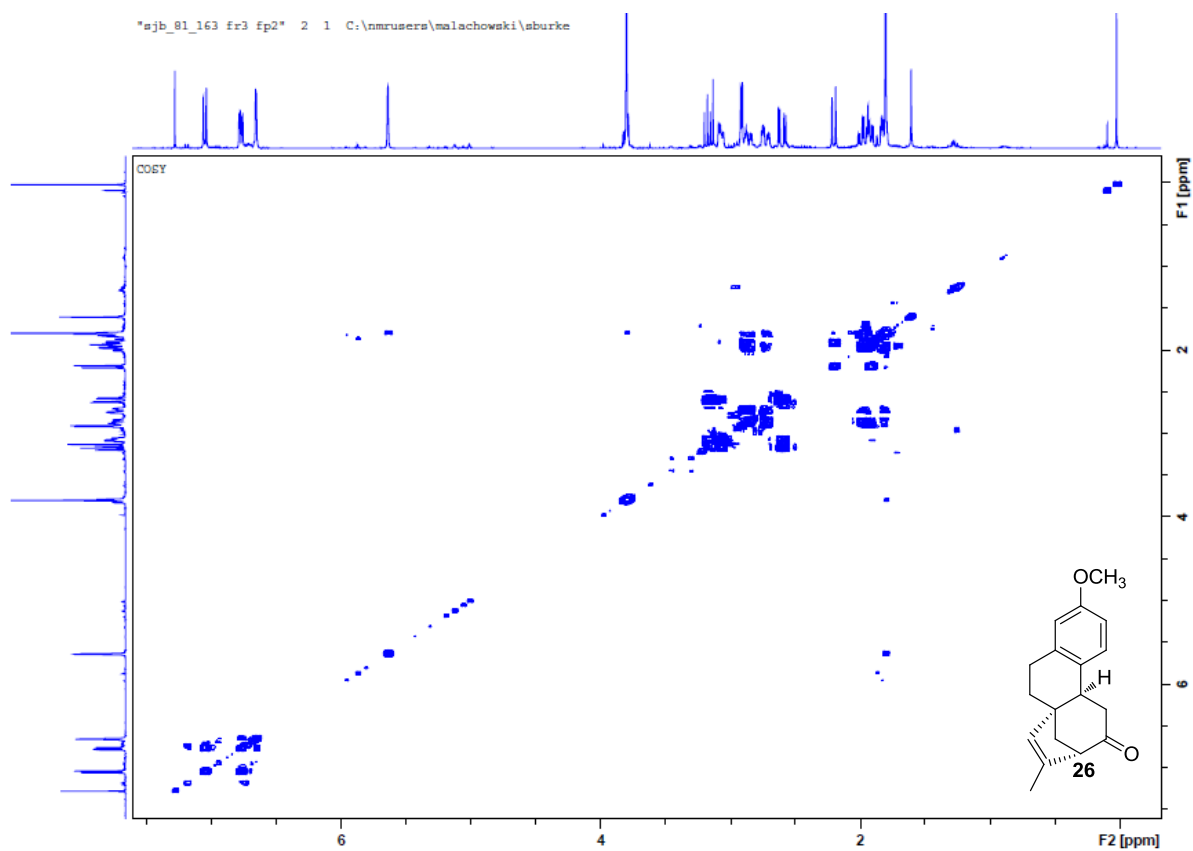

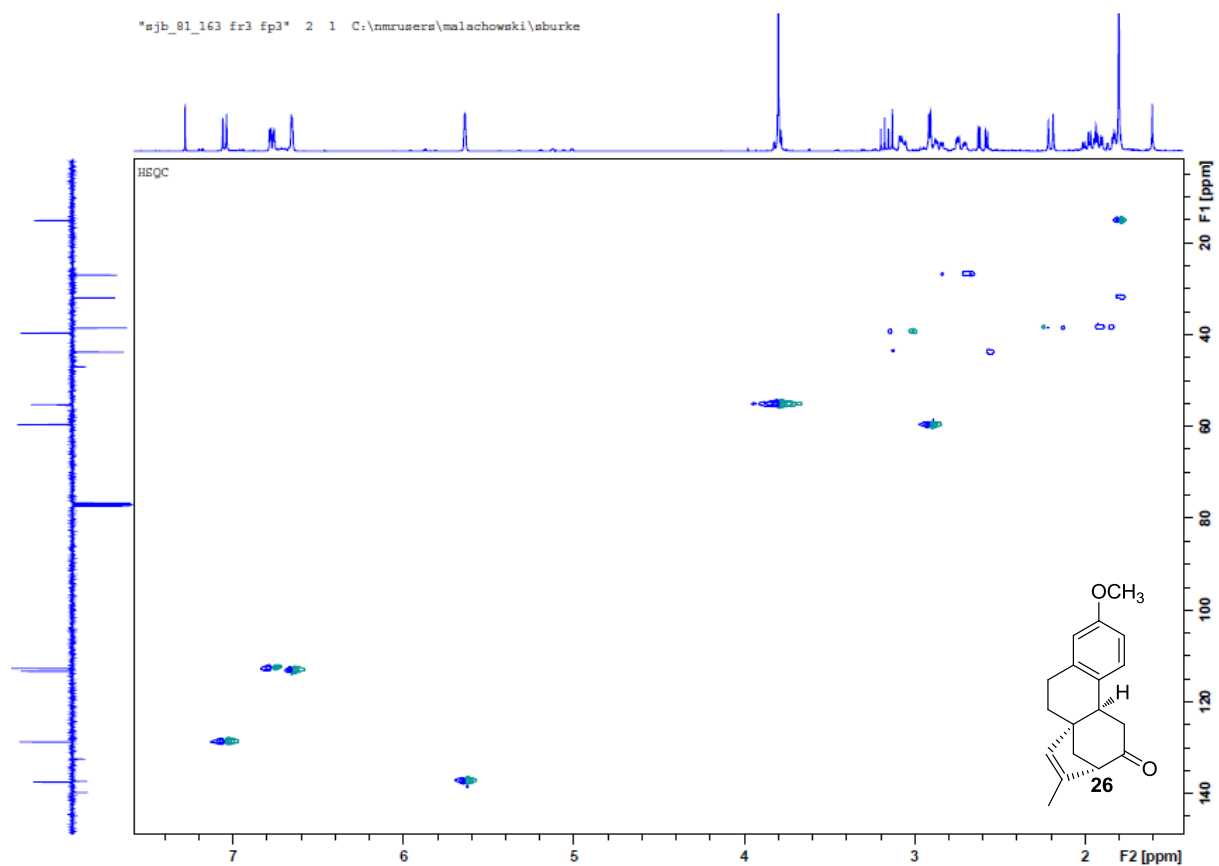

Supplement: c4ob02489c1.pdf [file c4ob02489c1.pdf]
